# Supplementary material
Source: PubMed Central journal article supplement (PMC5710734)

# Versatile Alkylation of (Hetero)Aryl iodides with Ketones via $\beta$ -C(sp<sup>3</sup>)-H Activation

Ru-Yi Zhu,<sup>†</sup> Luo-Yan Liu,<sup>†</sup> Han Seul Park,<sup>†</sup> Kai Hong,<sup>†</sup> Yongwei Wu,<sup>†</sup> Chris H. Senanayake,<sup>‡</sup> and Jin-Quan Yu<sup>\*†</sup>

<sup>†</sup> Department of Chemistry, The Scripps Research Institute, 10550 North Torrey Pines Road, La Jolla, California 92037, United States

<sup>‡</sup> Department of Chemical Development, Boehringer Ingelheim Pharmaceuticals Inc., 900 Ridgebury Road, Ridgefield, Connecticut 06877, United States

## Table of Contents

|                                                                    |     |
|--------------------------------------------------------------------|-----|
| General Information                                                | S1  |
| Substrate Structures                                               | S2  |
| Experimental Section                                               |     |
| Substrate Preparation                                              | S3  |
| The Scope of Ketones                                               | S12 |
| The Scope of Aryl Iodides                                          | S29 |
| The Scope of Heteroaryl Iodides                                    | S40 |
| The Late-Stage C(sp <sup>3</sup> )-H (Hetero)Arylation of Santonin | S48 |
| The Scale Up Reaction                                              | S50 |
| The Removal of Auxiliary                                           | S51 |
| References                                                         | S52 |
| <sup>1</sup> H and <sup>13</sup> C NMR Spectra                     | S52 |

## General Information

Ketones were obtained from the commercial sources or synthesized following literature procedures, and used to prepare the corresponding substrates. 2,2-Dimethyl aminoxyacetic acid hydrochloride was obtained from Combi-Blocks. AgTFA and HFIP (Hexafluoro-2-propanol) were obtained from Oakwood. Solvents were obtained from Sigma-Aldrich, Alfa-Aesar and Acros and used directly without further purification. Analytical thin layer chromatography was performed on 0.25 mm silica gel 60-F254. Visualization was carried out with UV light and Vogel's permanganate. <sup>1</sup>H NMR was recorded on Bruker AMX-400 instrument (400 MHz) or Bruker DRX-600 instrument (600 MHz). Chemical shifts were quoted in parts per million (ppm) referenced to 0.0 ppm for tetramethylsilane. The following abbreviations (or combinations thereof) were used to explain multiplicities: s = singlet, d = doublet, t = triplet, q = quartet, m = multiplet, br = broad. Coupling constants, *J*, were reported in Hertz unit (Hz). <sup>13</sup>C NMR spectra were recorded on Bruker AMX-400 instrument (100 MHz) or Bruker DRX-600 instrument (150 MHz), and were fully decoupled by broad band proton decoupling. <sup>19</sup>F NMR spectra were recorded on Bruker AMX-400 instrument (100 MHz), and were fully decoupled by broad band proton decoupling. Chemical shifts were reported in ppm referenced to either the center line of a triplet at 77.0 ppm of chloroform-*d* or the center line of a multiplet at 29.84 ppm of acetone-*d*<sup>6</sup>. High-resolution mass spectra (HRMS) were recorded on an Agilent Mass spectrometer using ESI-TOF (electrospray ionization-time of flight).

## Substrate Structures

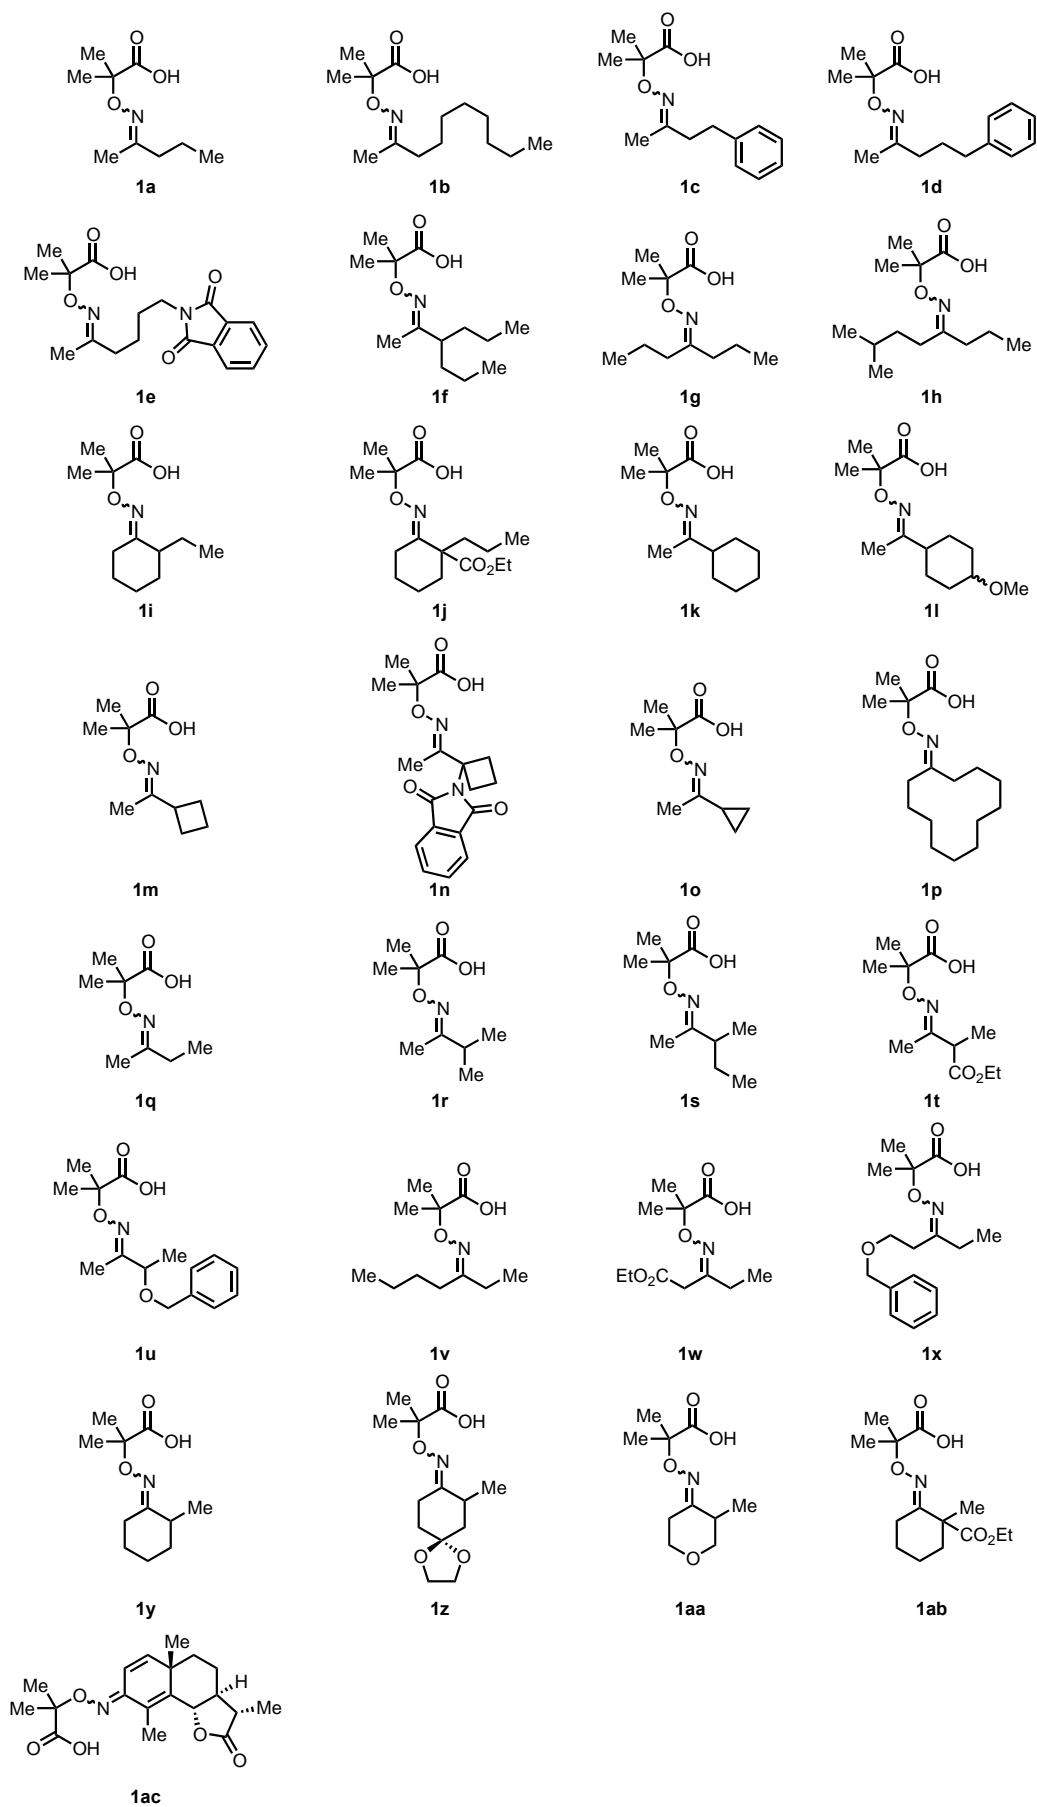

## Experimental Section

### Substrate Preparation

Ketones for making substrates **1a-d**, **1g**, **1i**, **1k**, **1m**, **1o-t**, **1v-ac** are commercially available. The syntheses of rest of ketones are based on literature.<sup>1</sup>

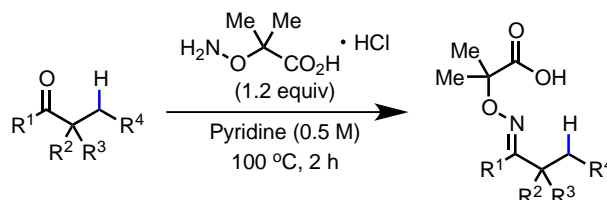

Ketone (2 mmol, 1 equiv) and 2,2-dimethyl aminoxyacetic acid hydrochloride (2.4 mmol, 372 mg, 1.2 equiv) were weighed in an oven dried 50 mL round bottom flask with a magnetic stir bar under air. 4 mL of pyridine was added and the mixture was stirred at 100 °C for 2 h. Upon completion, most pyridine was evaporated under vacuum. The resulting mixture was diluted with EtOAc (50 mL) and washed successively with water (100 mL) and diluted HCl aqueous solution (100 mL, ca. 0.01 M). The organic phase was dried with anhydrous Na<sub>2</sub>SO<sub>4</sub> and the solvent was removed under vacuum. Notably, the pure compounds were obtained in good yields for most cases without any chromatography.

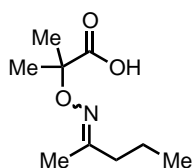

#### 2-Methyl-2-((pentan-2-ylideneamino)oxy)propanoic acid (**1a**)

White solid, E/Z (3.1:1). <sup>1</sup>H NMR (600 MHz, CDCl<sub>3</sub>) of E isomer (major) δ 2.24-2.22 (m, 2H), 1.92 (s, 3H), 1.61-1.53 (m, 2H), 1.50 (s, 6H), 0.93 (t, *J* = 7.2 Hz, 3H). <sup>1</sup>H NMR (600 MHz, CDCl<sub>3</sub>) of Z isomer (minor) δ 2.38-2.36 (m, 2H), 1.93 (s, 3H), 1.61-1.53 (m, 2H), 1.50 (s, 6H), 0.96 (t, *J* = 7.2 Hz, 3H). <sup>13</sup>C NMR (150 MHz, CDCl<sub>3</sub>) of E/Z mixture δ 177.48, 177.37, 161.45, 160.95, 80.78, 80.67, 37.79, 31.31, 24.22, 20.12, 19.28, 18.94, 14.33, 14.03, 13.41. HRMS (ESI-TOF) Calcd for C<sub>9</sub>H<sub>16</sub>NO<sub>3</sub><sup>-</sup> [M-H]<sup>-</sup>: 186.1136, found: 186.1132.

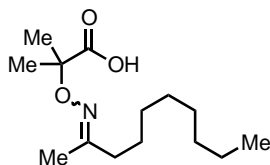

#### 2-((Decan-2-ylideneamino)oxy)-2-methylpropanoic acid (**1b**)

Colorless oil, E/Z (3.0:1). <sup>1</sup>H NMR (600 MHz, CDCl<sub>3</sub>) of E/Z mixture δ 2.38-2.35 (m, 1H), 2.25-2.21 (m, 3.0H), 1.92-1.90 (m, 6.0H), 1.53-1.50 (m, 16.4H), 1.30-1.26 (m, 21.1H), 0.90-0.86 (m, 6.1H). <sup>13</sup>C NMR (150 MHz, CDCl<sub>3</sub>) of E/Z mixture δ 176.85, 162.00, 161.51, 80.88, 80.76, 35.91, 31.81, 31.78, 29.47, 29.40, 29.21, 29.18, 29.14, 29.09, 28.98, 25.94, 25.44, 24.30, 24.26, 22.62, 22.60, 20.17, 14.44, 14.05. HRMS (ESI-TOF) Calcd for C<sub>14</sub>H<sub>26</sub>NO<sub>3</sub><sup>-</sup> [M-H]<sup>-</sup>: 256.1918, found: 256.1912.

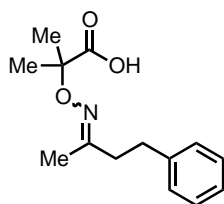

**2-Methyl-2-(((4-phenylbutan-2-ylidene)amino)oxy)propanoic acid (1c)**

E/Z (2.4:1). <sup>1</sup>H NMR (600 MHz, CDCl<sub>3</sub>) of E isomer (major) δ 7.30-7.27 (m, 2H), 7.20-7.16 (m, 3H), 2.88-2.85 (m, 2H), 2.60-2.57 (m, 2H), 1.93 (s, 3H), 1.44 (s, 6H). <sup>1</sup>H NMR (600 MHz, CDCl<sub>3</sub>) of Z isomer (minor) δ 7.31-7.29 (m, 2H), 7.23-7.20 (m, 3H), 2.85-2.83 (m, 2H), 2.70-2.68 (m, 2H), 1.88 (s, 3H), 1.46 (s, 6H). <sup>13</sup>C NMR (150 MHz, CDCl<sub>3</sub>) of E/Z mixture δ 176.62, 176.54, 160.80, 160.31, 140.60, 140.36, 128.52, 128.50, 128.26, 128.24, 126.36, 126.25, 81.05, 80.91, 37.51, 32.10, 31.56, 31.45, 24.21, 24.18, 20.53, 14.82. HRMS (ESI-TOF) Calcd for C<sub>14</sub>H<sub>18</sub>NO<sub>3</sub><sup>-</sup> [M-H]<sup>-</sup>: 248.1292, found: 248.1297.

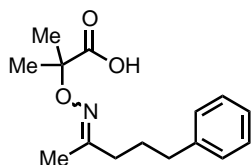

**2-Methyl-2-(((5-phenylpentan-2-ylidene)amino)oxy)propanoic acid (1d)**

E/Z (3.4:1). <sup>1</sup>H NMR (600 MHz, CDCl<sub>3</sub>) of E/Z mixture δ 7.30-7.28 (m, 2.6H), 7.22-7.16 (m, 3.9H), 2.66-2.62 (m, 2.6H), 2.42-2.40 (m, 0.59H), 2.29-2.27 (m, 2H), 1.93 (s, 0.81H), 1.91 (s, 3H), 1.89-1.83 (m, 2.7H), 1.51 (s, 6H), 1.48 (s, 1.7H). <sup>13</sup>C NMR (150 MHz, CDCl<sub>3</sub>) of E/Z mixture δ 176.51, 176.48, 161.64, 161.06, 141.44, 141.35, 128.42, 126.03, 125.99, 81.01, 80.90, 35.65, 35.43, 35.08, 29.14, 27.57, 27.07, 24.30, 24.25, 20.23, 14.63. HRMS (ESI-TOF) Calcd for C<sub>15</sub>H<sub>20</sub>NO<sub>3</sub><sup>-</sup> [M-H]<sup>-</sup>: 262.1449, found: 262.1455.

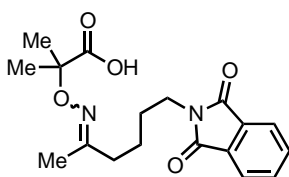

**2-(((6-(1,3-Dioxisoindolin-2-yl)hexan-2-ylidene)amino)oxy)-2-methylpropanoic acid (1e)**

White solid, E/Z (6.2:1). <sup>1</sup>H NMR (600 MHz, CDCl<sub>3</sub>) of E isomer (major) δ 7.86-7.84 (m, 2H), 7.73-7.71 (m, 2H), 3.69 (t, *J* = 7.2 Hz, 2H), 2.29 (t, *J* = 7.2 Hz, 2H), 1.90 (s, 3H), 1.73-1.68 (m, 2H), 1.62-1.57 (m, 2H), 1.50 (s, 6H). <sup>13</sup>C NMR (150 MHz, CDCl<sub>3</sub>) of E isomer (major) δ 176.13, 168.48, 160.07, 133.97, 132.02, 123.26, 81.05, 37.51, 35.17, 27.78, 24.19, 23.06, 14.56. HRMS (ESI-TOF) Calcd for C<sub>18</sub>H<sub>21</sub>N<sub>2</sub>O<sub>5</sub><sup>-</sup> [M-H]<sup>-</sup>: 345.1456, found: 345.1450.

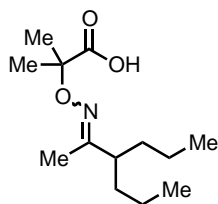

**2-Methyl-2-(((3-propylhexan-2-ylidene)amino)oxy)propanoic acid (1f)**

Colorless oil, E/Z (10.0:1). <sup>1</sup>H NMR (600 MHz, CDCl<sub>3</sub>) of E isomer (major) δ 2.37-2.31 (m, 1H), 1.82-1.80 (m, 3H), 1.50 (s, 6H), 1.43-1.38 (m, 4H), 1.25-1.18 (m, 4H), 0.90-0.87 (m, 3H). <sup>13</sup>C NMR (150 MHz, CDCl<sub>3</sub>) of E/Z mixture δ 177.15, 164.21, 80.89, 44.65, 34.48, 24.28, 20.43, 13.88, 10.78. HRMS (ESI-TOF) Calcd for C<sub>13</sub>H<sub>24</sub>NO<sub>3</sub><sup>-</sup> [M-H]<sup>-</sup>: 242.1762, found: 242.1755.

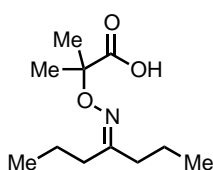

**2-((Heptan-4-ylideneamino)oxy)-2-methylpropanoic acid (1g)**

Colorless oil. <sup>1</sup>H NMR (600 MHz, CDCl<sub>3</sub>) δ 2.35-2.32 (m, 2H), 2.24-2.22 (m, 2H), 1.60-1.52 (m, 4H), 1.50 (s, 6H), 0.96 (t, *J* = 7.2 Hz, 3H), 0.94 (t, *J* = 7.2 Hz, 3H). <sup>13</sup>C NMR (150 MHz, CDCl<sub>3</sub>) δ 175.82, 165.29, 81.01, 36.31, 30.45, 24.34, 19.22, 19.16, 14.21, 13.62. HRMS (ESI-TOF) Calcd for C<sub>11</sub>H<sub>20</sub>NO<sub>3</sub><sup>-</sup> [M-H]<sup>-</sup>: 214.1449, found: 214.1444.

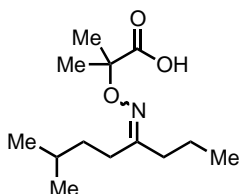

**2-Methyl-2-(((7-methyloctan-4-ylidene)amino)oxy)propanoic acid (1h)**

Colorless oil, E/Z (1:1). <sup>1</sup>H NMR (600 MHz, CDCl<sub>3</sub>) of E/Z mixture δ 2.35-2.32 (m, 2H), 2.25-2.21 (m, 2H), 1.59-1.53 (m, 3H), 1.50 (s, 3H), 1.49 (s, 3H), 1.42-1.35 (m, 2H), 0.97-0.90 (m, 9H). <sup>13</sup>C NMR (150 MHz, CDCl<sub>3</sub>) of E/Z mixture δ 176.44, 165.38, 165.25, 80.90, 80.87, 36.24, 34.82, 34.55, 32.30, 30.44, 28.21, 27.64, 26.53, 24.28, 22.29, 22.25, 19.24, 19.20, 14.22, 13.60. HRMS (ESI-TOF) Calcd for C<sub>13</sub>H<sub>24</sub>NO<sub>3</sub><sup>-</sup> [M-H]<sup>-</sup>: 242.1762, found: 242.1768.

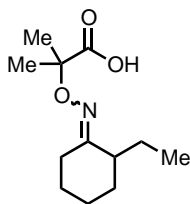

**2-(((2-Ethylcyclohexylidene)amino)oxy)-2-methylpropanoic acid (1i)**

E/Z (3.3:1). <sup>1</sup>H NMR (600 MHz, CDCl<sub>3</sub>) of E/Z mixture δ 3.37-3.33 (m, 0.30H), 2.70-2.66

(m, 1H), 2.34-2.30 (m, 1H), 2.28-2.27 (m, 0.30H), 2.24-2.18 (m, 1.3H), 1.96-1.88 (m, 1.6H), 1.79-1.38 (m, 19.8H), 0.91 (t,  $J = 7.2$  Hz, 3H), 0.88 (t,  $J = 7.2$  Hz, 1.0H).  $^{13}\text{C}$  NMR (150 MHz,  $\text{CDCl}_3$ ) of E/Z mixture  $\delta$  175.65, 166.80, 166.30, 166.29, 80.51, 80.42, 43.53, 34.66, 32.24, 29.51, 28.42, 26.66, 25.88, 23.94, 23.88, 23.85, 23.82, 23.49, 23.36, 22.93, 19.98, 11.45, 11.29. HRMS (ESI-TOF) Calcd for  $\text{C}_{12}\text{H}_{20}\text{NO}_3^-$  [M-H] $^-$ : 226.1449, found: 226.1445.

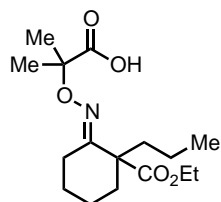

**(E)-2-(((2-(Ethoxycarbonyl)-2-propylcyclohexylidene)amino)oxy)-2-methylpropanoic acid (1j)**

Colorless oil.  $^1\text{H}$  NMR (600 MHz,  $\text{CDCl}_3$ )  $\delta$  4.17 (q,  $J = 7.2$  Hz, 2H), 3.13-3.09 (m, 1H), 2.37-2.33 (m, 1H), 2.00-1.95 (m, 1H), 1.85-1.80 (m, 1H), 1.79-1.74 (m, 1H), 1.70-1.60 (m, 2H), 1.54-1.50 (m, 1H), 1.52 (s, 6H), 1.47-1.41 (m, 2H), 1.34-1.23 (m, 2H), 1.25 (t,  $J = 7.2$  Hz, 3H), 0.88 (t,  $J = 7.2$  Hz, 3H).  $^{13}\text{C}$  NMR (150 MHz,  $\text{CDCl}_3$ )  $\delta$  177.19, 173.36, 162.66, 81.31, 61.00, 54.12, 37.63, 35.54, 25.55, 24.15, 24.13, 24.03, 22.53, 17.80, 14.43, 14.11. HRMS (ESI-TOF) Calcd for  $\text{C}_{16}\text{H}_{26}\text{NO}_5^-$  [M-H] $^-$ : 312.1816, found: 312.1812.

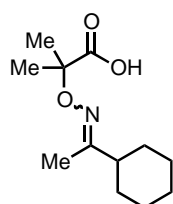

**2-(((1-Cyclohexylethylidene)amino)oxy)-2-methylpropanoic acid (1k)**

White solid, E/Z (20:1).  $^1\text{H}$  NMR (600 MHz,  $\text{CDCl}_3$ ) of E isomer (major)  $\delta$  2.22-2.18 (m, 1H), 1.90-1.88 (s, 3H), 1.81-1.79 (m, 4H), 1.72-1.69 (m, 1H), 1.50 (s, 6H), 1.33-1.18 (m, 5H).  $^{13}\text{C}$  NMR (150 MHz,  $\text{CDCl}_3$ ) of E isomer (major)  $\delta$  176.23, 165.36, 81.01, 44.70, 29.92, 28.77, 25.86, 24.32, 13.00. HRMS (ESI-TOF) Calcd for  $\text{C}_{12}\text{H}_{20}\text{NO}_3^-$  [M-H] $^-$ : 226.1449, found: 226.1443.

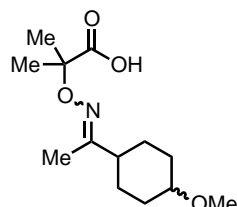

**2-(((1-(4-Methoxycyclohexyl)ethylidene)amino)oxy)-2-methylpropanoic acid (1l)**

Colorless oil, E/Z (>20:1).  $^1\text{H}$  NMR (600 MHz,  $\text{CDCl}_3$ ) of E isomer (major)  $\delta$  3.46-3.43 (m, 1H), 3.36 (s, 4.2H), 3.31 (s, 3H), 3.16-3.11 (m, 1.4H), 2.28-2.23 (m, 1H), 2.19-2.12 (m, 4.0H), 1.97-1.94 (m, 2H), 1.90-1.88 (m, 8.8H), 1.74-1.67 (m, 2H), 1.55-1.44 (m, 20.0H), 1.38-1.32

(m, 3H), 1.29-1.21 (m, 3H).  $^{13}\text{C}$  NMR (150 MHz,  $\text{CDCl}_3$ ) of E isomer (major)  $\delta$  176.66, 176.54, 164.21, 163.58, 80.97, 80.93, 78.75, 74.54, 55.68, 55.58, 43.81, 43.54, 31.17, 28.69, 27.91, 24.26, 24.21, 23.95, 13.07, 12.58. HRMS (ESI-TOF) Calcd for  $\text{C}_{13}\text{H}_{22}\text{NO}_4^-$  [M-H] $^-$ : 256.1554, found: 256.1556.

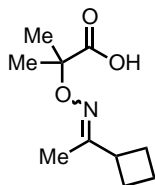

**2-(((1-Cyclobutylethylidene)amino)oxy)-2-methylpropanoic acid (1m)**

White solid, E/Z (10:1).  $^1\text{H}$  NMR (600 MHz,  $\text{CDCl}_3$ ) of E isomer (major)  $\delta$  3.12 (quintet,  $J = 8.4$  Hz, 1H), 2.18-2.08 (m, 4H), 2.02-1.96 (m, 1H), 1.87 (s, 3H), 1.86-1.80 (m, 1H), 1.51 (s, 6H).  $^{13}\text{C}$  NMR (150 MHz,  $\text{CDCl}_3$ ) of E/Z mixture  $\delta$  176.29, 163.33, 81.06, 40.16, 26.64, 25.62, 24.34, 18.21, 12.63. HRMS (ESI-TOF) Calcd for  $\text{C}_{10}\text{H}_{16}\text{NO}_3^-$  [M-H] $^-$ : 198.1136, found: 198.1133.

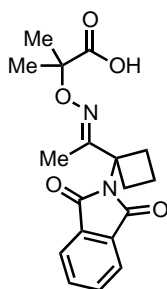

**(E)-2-(((1-(1-(1,3-Dioxoisindolin-2-yl)cyclobutyl)ethylidene)amino)oxy)-2-methylpropanoic acid (1n)**

White solid.  $^1\text{H}$  NMR (600 MHz,  $\text{CDCl}_3$ )  $\delta$  7.82-7.78 (m, 2H), 7.72-7.69 (m, 2H), 2.87-2.76 (m, 4H), 2.01 (s, 3H), 2.00-1.94 (m, 2H), 1.50 (s, 6H).  $^{13}\text{C}$  NMR (150 MHz,  $\text{CDCl}_3$ )  $\delta$  176.89, 168.10, 156.69, 134.05, 131.96, 123.11, 81.70, 61.45, 31.28, 24.07, 17.24, 10.56. HRMS (ESI-TOF) Calcd for  $\text{C}_{18}\text{H}_{19}\text{N}_2\text{O}_5^-$  [M-H] $^-$ : 343.1299, found: 343.1293.

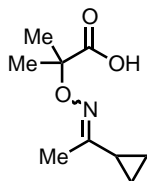

**2-(((1-Cyclopropylethylidene)amino)oxy)-2-methylpropanoic acid (1o)**

White solid, E/Z (3.2:1).  $^1\text{H}$  NMR (600 MHz,  $\text{CDCl}_3$ ) of E isomer (major)  $\delta$  1.76 (s, 3H), 1.69-1.64 (m, 1H), 1.52 (s, 6H).  $^{13}\text{C}$  NMR (150 MHz,  $\text{CDCl}_3$ ) of E isomer (major)  $\delta$  176.40, 162.69, 162.65, 81.06, 81.03, 24.32, 15.49, 14.90, 11.85, 9.80, 5.9, 5.5. HRMS (ESI-TOF) Calcd for  $\text{C}_9\text{H}_{14}\text{NO}_3^-$  [M-H] $^-$ : 184.0979, found: 184.0986.

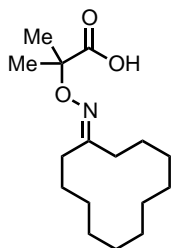

**2-((Cyclododecylideneamino)oxy)-2-methylpropanoic acid (1p)**

White solid.  $^1\text{H}$  NMR (600 MHz,  $\text{CDCl}_3$ )  $\delta$  2.47-2.45 (m, 2H), 2.37-2.35 (m, 2H), 1.72-1.68 (m, 2H), 1.65-1.60 (m, 2H), 1.53 (s, 6H), 1.41-1.28 (m, 14H).  $^{13}\text{C}$  NMR (150 MHz,  $\text{CDCl}_3$ )  $\delta$  176.27, 163.80, 81.02, 30.54, 27.60, 25.70, 25.26, 24.52, 24.42, 23.57, 23.41, 23.38, 22.98, 22.68, 22.64. HRMS (ESI-TOF) Calcd for  $\text{C}_{16}\text{H}_{28}\text{NO}_3^-$  [M-H] $^-$ : 282.2075, found: 282.2071.

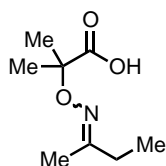

**2-((Butan-2-ylideneamino)oxy)-2-methylpropanoic acid (1q)**

White solid, E/Z (1:1).  $^1\text{H}$  NMR (600 MHz,  $\text{CDCl}_3$ )  $\delta$  2.44-2.39 (m, 2H), 2.32-2.27 (m, 2H), 1.95-1.93 (m, 6H), 1.53-1.52 (m, 12H), 1.14-1.08 (m, 6H).  $^{13}\text{C}$  NMR (150 MHz,  $\text{CDCl}_3$ ) of E/Z mixture  $\delta$  177.23, 177.00, 162.80, 162.21, 80.88, 80.72, 29.41, 24.27, 24.24, 22.73, 19.60, 19.58, 14.36, 10.52, 9.9. HRMS (ESI-TOF) Calcd for  $\text{C}_8\text{H}_{14}\text{NO}_3^-$  [M-H] $^-$ : 172.0979, found: 172.0972.

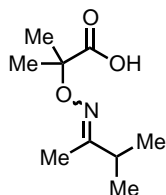

**2-Methyl-2-(((3-methylbutan-2-ylidene)amino)oxy)propanoic acid (1r)**

White solid, E/Z (16.7:1).  $^1\text{H}$  NMR (600 MHz,  $\text{CDCl}_3$ ) of E isomer (major)  $\delta$  2.54 (septet, J = 7.2 Hz, 1H), 1.89 (s, 3H), 1.50 (s, 6H), 1.13 (s, 3H), 1.12 (s, 3H).  $^{13}\text{C}$  NMR (150 MHz,  $\text{CDCl}_3$ ) of E isomer (major)  $\delta$  176.16, 165.95, 81.05, 34.80, 24.32, 19.58, 12.37. HRMS (ESI-TOF) Calcd for  $\text{C}_9\text{H}_{16}\text{NO}_3^-$  [M-H] $^-$ : 186.1136, found: 186.1139.

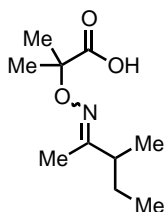

**2-Methyl-2-(((3-methylpentan-2-ylidene)amino)oxy)propanoic acid (1s)**

Colorless oil, E/Z (10:1).  $^1\text{H}$  NMR (600 MHz,  $\text{CDCl}_3$ ) of E isomer (major)  $\delta$  2.38-2.32 (m,



1H), 1.86 (s, 3H), 1.55-1.50 (m, 1H), 1.51 (s, 3H), 1.50 (s, 3H), 1.47-1.42 (m, 1H), 1.09 (d,  $J = 7.2$  Hz, 3H), 0.86 (t,  $J = 7.2$  Hz, 3H).  $^{13}\text{C}$  NMR (150 MHz,  $\text{CDCl}_3$ ) of E isomer (major)  $\delta$  176.36, 165.18, 80.98, 41.45, 26.65, 24.30, 17.42, 11.56. HRMS (ESI-TOF) Calcd for  $\text{C}_{10}\text{H}_{18}\text{NO}_3^-$  [M-H] $^-$ : 200.1292, found: 200.1285.

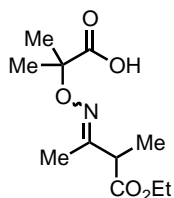

**2-(((4-Ethoxy-3-methyl-4-oxobutan-2-ylidene)amino)oxy)-2-methylpropanoic acid (1t)**

Colorless oil, E/Z (3.8:1).  $^1\text{H}$  NMR (600 MHz,  $\text{CDCl}_3$ ) of E isomer (major)  $\delta$  4.17 (qd,  $J_1 = 1.8$  Hz,  $J_2 = 7.2$  Hz, 2H), 3.39 (q,  $J = 7.2$  Hz, 1H), 1.93 (s, 3H), 1.53 (s, 6H), 1.35 (d,  $J = 7.2$  Hz, 3H), 1.26 (t,  $J = 7.2$  Hz, 3H).  $^1\text{H}$  NMR (600 MHz,  $\text{CDCl}_3$ ) of Z isomer (minor)  $\delta$  4.19 (q,  $J_2 = 7.2$  Hz, 2H), 3.92 (q,  $J = 7.2$  Hz, 1H), 1.94 (s, 3H), 1.52 (d,  $J = 14.4$  Hz, 6H), 1.34 (d,  $J = 7.2$  Hz, 3H), 1.28 (t,  $J = 7.2$  Hz, 3H).  $^{13}\text{C}$  NMR (150 MHz,  $\text{CDCl}_3$ ) of E isomer (major)  $\delta$  177.51, 172.11, 158.33, 81.26, 61.14, 45.86, 24.13, 24.08, 14.27, 14.05.  $^{13}\text{C}$  NMR (150 MHz,  $\text{CDCl}_3$ ) of Z isomer (minor)  $\delta$  176.97, 172.21, 157.41, 81.42, 61.34, 39.80, 23.90, 17.99, 12.90, 12.67. HRMS (ESI-TOF) Calcd for  $\text{C}_{11}\text{H}_{18}\text{NO}_5^-$  [M-H] $^-$ : 244.1190, found: 244.1197.

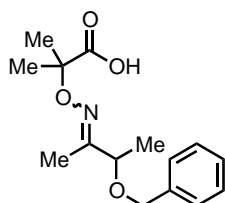

**2-(((3-(Benzyloxy)butan-2-ylidene)amino)oxy)-2-methylpropanoic acid (1u)**

Colorless oil, E/Z (14.3:1).  $^1\text{H}$  NMR (600 MHz,  $\text{CDCl}_3$ ) of E isomer (major)  $\delta$  7.34-7.25 (m, 5H), 4.43 (d,  $J = 11.4$  Hz, 1H), 4.30 (d,  $J = 12.0$  Hz, 1H), 4.05 (q,  $J = 6.6$  Hz, 1H), 1.89 (s, 3H), 1.54 (s, 3H), 1.53 (s, 3H), 1.30 (d,  $J = 6.6$  Hz, 3H).  $^{13}\text{C}$  NMR (150 MHz,  $\text{CDCl}_3$ ) of E isomer (major)  $\delta$  179.23, 160.11, 137.88, 128.36, 127.87, 127.65, 80.94, 75.46, 70.37, 24.13, 23.99, 18.84, 9.12. HRMS (ESI-TOF) Calcd for  $\text{C}_{15}\text{H}_{20}\text{NO}_4^-$  [M-H] $^-$ : 278.1398, found: 278.1392.

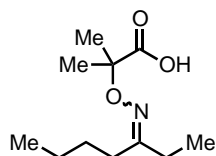

**2-((Heptan-3-ylideneamino)oxy)-2-methylpropanoic acid (1v)**

Colorless oil, E/Z (1:1).  $^1\text{H}$  NMR (600 MHz,  $\text{CDCl}_3$ ) of E/Z mixture  $\delta$  2.39-2.34 (m, 2H), 2.31-2.23 (m, 2H), 1.54-1.46 (m, 2H), 1.50 (s, 6H), 1.39-1.31 (m, 2H), 1.13-1.07 (m, 3H), 0.94-0.91 (m, 3H).  $^{13}\text{C}$  NMR (150 MHz,  $\text{CDCl}_3$ ) of E/Z mixture  $\delta$  176.73, 176.61, 165.99, 80.91, 33.63, 28.19, 27.92, 27.79, 27.75, 24.28, 22.71, 22.22, 21.88, 13.73, 10.41, 10.10. HRMS (ESI-TOF) Calcd for  $\text{C}_{11}\text{H}_{20}\text{NO}_3^-$  [M-H] $^-$ : 214.1449, found: 214.1443.

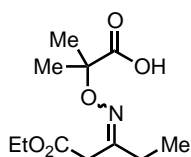

**2-(((1-Ethoxy-1-oxopentan-3-ylidene)amino)oxy)-2-methylpropanoic acid (1w)**

Colorless oil, E/Z (2.6:1). <sup>1</sup>H NMR (600 MHz, CDCl<sub>3</sub>) of E/Z mixture δ 4.22-4.15 (m, 2H), 3.36 (s, 1.5H), 3.24 (s, 0.5H), 2.46 (q, *J* = 7.8 Hz, 0.6H), 2.32 (q, *J* = 7.2 Hz, 1.4H), 1.52 (s, 6H), 1.30-1.26 (m, 3H), 1.12-1.07 (m, 3H). <sup>13</sup>C NMR (150 MHz, CDCl<sub>3</sub>) of E/Z mixture δ 177.50, 176.27, 169.45, 169.34, 158.49, 156.57, 81.83, 81.15, 61.72, 61.19, 39.37, 34.63, 28.69, 24.23, 24.06, 23.93, 21.92, 14.02, 10.16, 9.71. HRMS (ESI-TOF) Calcd for C<sub>11</sub>H<sub>18</sub>NO<sub>5</sub><sup>-</sup> [M-H]<sup>-</sup>: 244.1190, found: 244.1182.

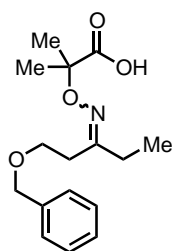

**2-(((1-(Benzyloxy)pentan-3-ylidene)amino)oxy)-2-methylpropanoic acid (1x)**

Colorless oil, E/Z (1.7:1). <sup>1</sup>H NMR (600 MHz, CDCl<sub>3</sub>) of E/Z mixture δ 7.36-7.28 (m, 5H), 4.52 (s, 1.2H), 4.51 (s, 0.7H), 3.70 (t, *J* = 6.6 Hz, 0.8H), 3.63 (t, *J* = 6.6 Hz, 1.2H), 2.68 (t, *J* = 6.6 Hz, 1.2H), 2.56 (t, *J* = 6.6 Hz, 0.7H), 2.39 (q, *J* = 7.8 Hz, 0.7H), 2.26 (t, *J* = 7.2 Hz, 1.3H), 1.51-1.49 (m, 6H), 1.09-1.06 (m, 3H). <sup>13</sup>C NMR (150 MHz, CDCl<sub>3</sub>) of E/Z mixture δ 176.32, 176.18, 163.35, 162.34, 137.95, 137.41, 128.45, 128.38, 127.89, 127.84, 127.71, 127.67, 81.29, 81.04, 73.06, 72.93, 66.54, 66.05, 34.11, 28.95, 27.88, 24.25, 24.08, 22.17, 10.32, 9.96. HRMS (ESI-TOF) Calcd for C<sub>16</sub>H<sub>22</sub>NO<sub>4</sub><sup>-</sup> [M-H]<sup>-</sup>: 292.1554, found: 292.1550.

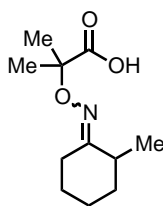

**2-Methyl-2-(((2-methylcyclohexylidene)amino)oxy)propanoic acid (1y)**

Colorless oil, E/Z (6.6:1). <sup>1</sup>H NMR (600 MHz, CDCl<sub>3</sub>) of E/Z mixture δ 3.56-3.51 (m, 0.13H), 3.09-3.06 (m, 0.86H), 2.40-2.22 (m, 1H), 1.97-1.92 (m, 2H), 1.84-1.77 (m, 1.7H), 1.62-1.43 (m, 8.7H), 1.35-1.29 (m, 1H), 1.13-1.10 (m, 3H). <sup>13</sup>C NMR (150 MHz, CDCl<sub>3</sub>) of E/Z mixture δ 176.58, 176.45, 166.98, 166.90, 80.91, 80.89, 37.52, 37.50, 35.70, 31.55, 28.40, 27.73, 26.61, 26.14, 25.01, 24.98, 24.48, 24.30, 24.28, 24.18, 24.16, 20.14, 16.62, 16.32. HRMS (ESI-TOF) Calcd for C<sub>11</sub>H<sub>18</sub>NO<sub>3</sub><sup>-</sup> [M-H]<sup>-</sup>: 212.1292, found: 212.1298.

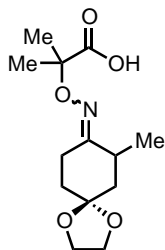

**2-Methyl-2-(((7-methyl-1,4-dioxaspiro[4.5]decan-8-ylidene)amino)oxy)propanoic acid (1z)**

White solid, E/Z (16.7:1). <sup>1</sup>H NMR (600 MHz, CDCl<sub>3</sub>) of E isomer (major) δ 4.01-3.97 (m, 4H), 3.25-3.21 (m, 1H), 2.72-2.65 (m, 1H), 2.16-2.10 (m, 1H), 1.97-1.94 (m, 1H), 1.89-1.86 (m, 1H), 1.71-1.65 (m, 1H), 1.58-1.53 (m, 1H), 1.51 (s, 6H), 1.13-1.11 (m, 3H). <sup>13</sup>C NMR (150 MHz, CDCl<sub>3</sub>) of E isomer (major) δ 176.45, 164.26, 107.65, 81.15, 64.59, 64.50, 43.13, 34.75, 33.46, 24.26, 24.13, 22.04, 16.09. HRMS (ESI-TOF) Calcd for C<sub>13</sub>H<sub>20</sub>NO<sub>5</sub><sup>-</sup> [M-H]<sup>-</sup>: 270.1347, found: 270.1355.

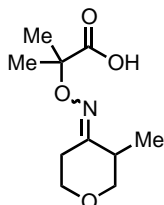

**2-Methyl-2-(((3-methyldihydro-2H-pyran-4(3H)-ylidene)amino)oxy)propanoic acid (1aa)**

Colorless oil, E/Z (4.0:1). <sup>1</sup>H NMR (600 MHz, CDCl<sub>3</sub>) of E isomer (major) δ 3.94-3.90 (m, 2H), 3.63-3.59 (m, 1H), 3.36-3.32 (m, 1H), 3.00-2.96 (m, 1H), 2.59-2.54 (m, 1H), 2.40-2.35 (m, 1H), 1.52 (s, 6H), 1.08 (d, *J* = 7.2 Hz, 3H). <sup>13</sup>C NMR (150 MHz, CDCl<sub>3</sub>) of E/Z mixture δ 177.57, 177.20, 161.57, 161.10, 81.05, 80.77, 74.15, 72.16, 68.23, 67.13, 37.01, 30.30, 28.91, 25.80, 24.27, 24.15, 24.12, 24.04, 22.05, 12.79. HRMS (ESI-TOF) Calcd for C<sub>10</sub>H<sub>16</sub>NO<sub>4</sub><sup>-</sup> [M-H]<sup>-</sup>: 214.1085, found: 214.1080.

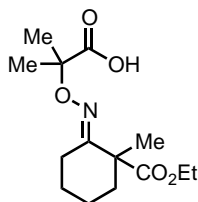

**(E)-2-(((2-(Ethoxycarbonyl)-2-methylcyclohexylidene)amino)oxy)-2-methylpropanoic acid (1ab)**

Colorless oil. <sup>1</sup>H NMR (600 MHz, CDCl<sub>3</sub>) δ 4.19-4.15 (m, 2H), 3.19-3.15 (m, 1H), 2.42-2.39 (m, 1H), 2.00-1.94 (m, 1H), 1.83-1.80 (m, 1H), 1.71-1.67 (m, 1H), 1.52 (s, 6H), 1.50-1.39 (m, 3H), 1.37-1.35 (m, 3H), 1.27-1.24 (m, 3H). <sup>13</sup>C NMR (150 MHz, CDCl<sub>3</sub>) δ 176.34, 174.02, 163.93, 81.47, 61.26, 50.23, 37.70, 25.40, 24.20, 23.95, 22.57, 22.55, 14.06. HRMS (ESI-TOF) Calcd for C<sub>14</sub>H<sub>22</sub>NO<sub>5</sub><sup>-</sup> [M-H]<sup>-</sup>: 284.1503, found: 284.1500.

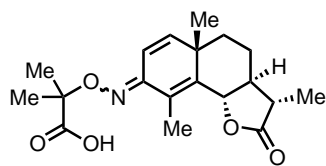

**2-Methyl-2-(((3S,3aS,5aS,9bS)-3,5a,9-trimethyl-2-oxo-2,3,3a,4,5,5a-hexahydronaphtho[1,2-b]furan-8(9bH)-ylidene)amino)oxy)propanoic acid (**1ac**)**

Pale yellow solid, E/Z (11.1:1). <sup>1</sup>H NMR (600 MHz, CDCl<sub>3</sub>) of E isomer (major) δ 6.87 (d, *J* = 10.2 Hz, 3H), 6.15 (d, *J* = 9.6 Hz, 3H), 4.82-4.79 (m, 1H), 2.40-2.34 (m, 1H), 2.14 (s, 3H), 2.03-1.99 (m, 1H), 1.84-1.77 (m, 2H), 1.71-1.64 (m, 1H), 1.58 (s, 3H), 1.57 (s, 3H), 1.52-1.47 (m, 1H), 1.27-1.25 (m, 6H). <sup>13</sup>C NMR (150 MHz, CDCl<sub>3</sub>) of E isomer (major) δ 177.83, 175.97, 151.79, 147.69, 141.32, 122.22, 112.60, 82.01, 53.48, 40.96, 38.10, 25.60, 24.31, 23.55, 12.44, 12.08. HRMS (ESI-TOF) Calcd for C<sub>19</sub>H<sub>24</sub>NO<sub>5</sub> [M-H]<sup>-</sup>: 346.1660, found: 346.1669.

**The Scope of Ketones**

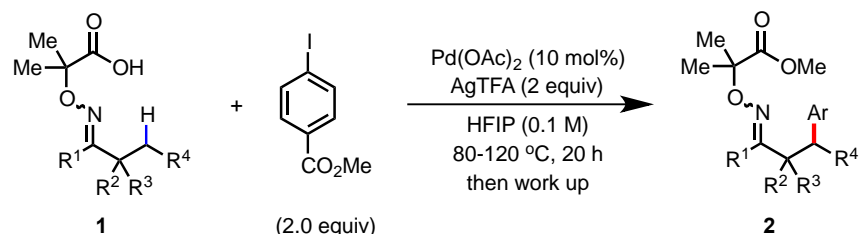

**General Procedure for  $\beta$ -C(sp<sup>3</sup>)-H Arylation of Ketones:** Substrate **1** (0.10 mmol), ArI (0.20 mmol, 52.4 mg), Pd(OAc)<sub>2</sub> (0.01 mmol, 2.3 mg), and AgTFA (0.20 mmol, 44.2 mg) were weighed into a reaction vial (10 mL) with a magnetic stir bar under air. HFIP (1.0 mL) was added, and the vial was sealed with a cap. The reaction mixture was stirred at 80-120 °C for 20 hours. Upon completion, the reaction mixture was cooled to room temperature and diluted with EtOAc. Then the reaction mixture was filtered through a short celite plug and transferred to a reaction vial (10 mL) with a magnetic stir bar. The solvent was evaporated under vacuum. Anhydrous MeOH (1.0 mL) was added to the mixture. SOCl<sub>2</sub> (0.30 mmol, 22  $\mu$ L) was added dropwise at room temperature. The reaction mixture was stirred at room temperature for 30 min. Upon completion, the solvent was removed under vacuum and the resulting mixture was purified by preparative thin-layer chromatography.

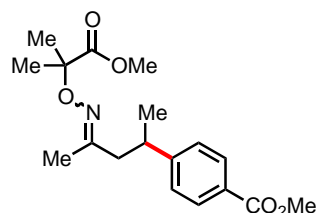

**Methyl 4-(4-(((1-methoxy-2-methyl-1-oxopropan-2-yl)oxy)imino)pentan-2-yl)benzoate (**2a**)**

Substrate **1a** was arylated following the general arylation procedure at 120 °C. After purification by preparative thin-layer chromatography (Hexane : EtOAc = 5:1 as eluent), **2a**

E/Z (3.7:1) was obtained as a colorless oil (25.1 mg, 75%). <sup>1</sup>H NMR (600 MHz, CDCl<sub>3</sub>) of E isomer (major) δ 7.96-7.94 (m, 2H), 7.27-7.25 (m, 2H), 3.90 (s, 3H), 3.67 (s, 3H), 3.10 (sextet, *J* = 7.2 Hz, 1H), 2.44 (ABqd, *J*<sub>1</sub> = 7.2 Hz, *J*<sub>2</sub> = 14.4 Hz, 2H), 1.79 (s, 3H), 1.42 (s, 3H), 1.39 (s, 3H), 1.24 (d, *J* = 6.6 Hz, 3H). <sup>1</sup>H NMR (600 MHz, CDCl<sub>3</sub>) of Z isomer (minor) δ 7.98-7.96 (m, 2H), 7.32-7.30 (m, 2H), 3.90 (s, 3H), 3.72 (s, 3H), 3.27 (sextet, *J* = 7.2 Hz, 1H), 2.60 (ABqd, *J*<sub>1</sub> = 7.2 Hz, *J*<sub>2</sub> = 13.2 Hz, 2H), 1.62 (s, 3H), 1.49 (s, 3H), 1.44 (s, 3H), 1.30 (d, *J* = 7.2 Hz, 3H). <sup>13</sup>C NMR (150 MHz, CDCl<sub>3</sub>) of E/Z mixture δ 174.95, 174.92, 167.06, 156.49, 155.99, 151.95, 151.76, 129.74, 129.73, 128.07, 126.99, 126.96, 80.68, 51.95, 43.80, 37.91, 37.01, 36.79, 24.30, 24.17, 24.06, 24.03, 21.76, 21.52, 20.84, 14.50. HRMS (ESI-TOF) Calcd for C<sub>18</sub>H<sub>26</sub>NO<sub>5</sub><sup>+</sup> [M+H]<sup>+</sup>: 336.1805, found: 336.1800.

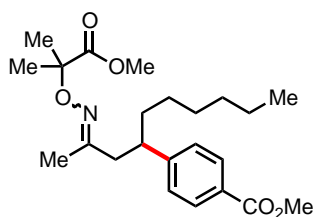

**Methyl 4-(2-(((1-methoxy-2-methyl-1-oxopropan-2-yl)oxy)imino)decan-4-yl)benzoate (2b)**

Substrate **1b** was arylated following the general arylation procedure at 120 °C. After purification by preparative thin-layer chromatography (Hexane : EtOAc = 10:1 as eluent), **2b** E/Z (2.8:1) was obtained as a colorless oil (31.7 mg, 78%). <sup>1</sup>H NMR (600 MHz, CDCl<sub>3</sub>) of E isomer (major) δ 7.96-7.94 (m, 2H), 7.21-7.20 (m, 2H), 3.90 (s, 3H), 3.66 (s, 3H), 2.94-2.89 (m, 1H), 2.51-2.40 (m, 2H), 1.75 (s, 3H), 1.68-1.61 (m, 1H), 1.56-1.48 (m, 1H), 1.38 (s, 3H), 1.34 (s, 3H), 1.27-1.02 (m, 8H), 1.24 (t, *J* = 7.2 Hz, 3H). <sup>13</sup>C NMR (150 MHz, CDCl<sub>3</sub>) of E/Z mixture δ 174.94, 167.11, 156.67, 156.07, 150.46, 130.18, 129.61, 129.60, 128.19, 128.04, 127.70, 127.65, 127.22, 80.60, 80.52, 51.93, 42.91, 42.63, 42.52, 36.08, 31.64, 29.20, 29.13, 27.29, 27.22, 24.33, 24.16, 23.98, 23.95, 22.55, 22.53, 14.52, 13.99. HRMS (ESI-TOF) Calcd for C<sub>23</sub>H<sub>36</sub>NO<sub>5</sub><sup>+</sup> [M+H]<sup>+</sup>: 406.2588, found: 406.2592.

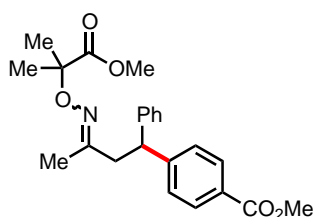

**Methyl**

**4-(3-(((1-methoxy-2-methyl-1-oxopropan-2-yl)oxy)imino)-1-phenylbutyl)benzoate (2c)**

Substrate **1c** was arylated following the general arylation procedure at 100 °C. After purification by preparative thin-layer chromatography (Toluene : EtOAc = 30:1 as eluent), **2c** E/Z (2.7:1) was obtained as a colorless oil (20.7 mg, 52%). <sup>1</sup>H NMR (600 MHz, CDCl<sub>3</sub>) of E isomer (major) δ 7.94-7.92 (m, 2H), 7.30-7.16 (m, 7H), 4.38 (t, *J* = 8.4 Hz, 1H), 3.88 (s, 3H), 3.60 (s, 3H), 2.96-2.90 (m, 2H), 1.80 (s, 3H), 1.32 (s, 3H), 1.31 (s, 3H). <sup>13</sup>C NMR (150 MHz, CDCl<sub>3</sub>) of E/Z mixture δ 174.82, 166.95, 156.08, 155.32, 149.35, 149.30, 143.27, 143.18,

129.74, 129.73, 128.53, 128.33, 128.13, 127.99, 127.92, 127.87, 127.79, 126.67, 126.51, 80.73, 52.00, 51.97, 51.93, 47.72, 47.09, 41.52, 35.68, 24.20, 24.18, 24.02, 20.69, 14.59. HRMS (ESI-TOF) Calcd for  $C_{23}H_{28}NO_5^+$  [M+H]<sup>+</sup>: 398.1962, found: 398.1960.

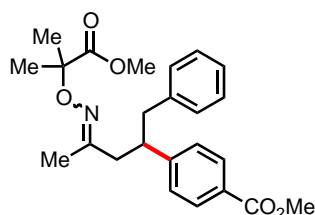

### Methyl

#### 4-(4-(((1-methoxy-2-methyl-1-oxopropan-2-yl)oxy)imino)-1-phenylpentan-2-yl)benzoate (2d)

Substrate **1d** was arylated following the general arylation procedure at 120 °C. After purification by preparative thin-layer chromatography (Hexane : EtOAc = 5:1 as eluent), **2d** E/Z (3.0:1) was obtained as a colorless oil (26.7 mg, 65%). <sup>1</sup>H NMR (600 MHz, CDCl<sub>3</sub>) of E/Z mixture δ 7.93-7.91 (m, 0.71H), 7.90-7.88 (m, 2H), 7.24-7.23 (m, 0.72H), 7.21-7.11 (m, 6.2H), 7.05-7.04 (m, 0.74H), 6.95-6.94 (m, 2H), 3.90 (s, 1.0H), 3.88 (s, 3H), 3.70 (s, 1.0H), 3.64 (s, 3H), 3.44-3.39 (m, 0.33H), 3.25 (quintet, *J* = 7.2 Hz, 1H), 2.98-2.92 (m, 1.7H), 2.82-2.79 (m, 1.4H), 2.59-2.49 (m, 2.4H), 1.76 (s, 3H), 1.49 (s, 1.0H), 1.45 (s, 1.0H), 1.39 (s, 4.0H), 1.37 (s, 3H). <sup>13</sup>C NMR (150 MHz, CDCl<sub>3</sub>) of E/Z mixture δ 174.91, 174.86, 167.08, 167.04, 156.37, 155.74, 149.37, 139.45, 129.59, 129.50, 129.11, 129.00, 128.20, 128.13, 127.85, 127.79, 80.72, 51.98, 51.95, 44.62, 44.42, 43.13, 42.58, 41.32, 24.39, 24.18, 24.02, 23.92, 20.82, 14.64. HRMS (ESI-TOF) Calcd for  $C_{24}H_{30}NO_5^+$  [M+H]<sup>+</sup>: 412.2118, found: 412.2112.

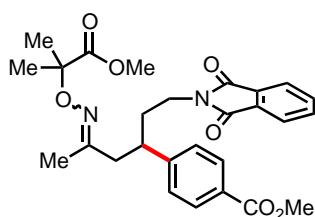

### (E)-Methyl

#### 4-(1-(1,3-dioxisoindolin-2-yl)-5-(((1-methoxy-2-methyl-1-oxopropan-2-yl)oxy)imino)hexan-3-yl)benzoate (2e)

Substrate **1e** was arylated following the general arylation procedure at 120 °C. After purification by preparative thin-layer chromatography (Hexane : EtOAc = 2:1 as eluent), **2e** E/Z (2.7:1) was obtained as a colorless oil (24.8 mg, 50%). <sup>1</sup>H NMR (600 MHz, CDCl<sub>3</sub>) of E/Z mixture δ 7.89-7.87 (m, 2H), 7.85-7.83 (m, 5.5H), 7.76-7.72 (m, 7.3H), 7.66-7.63 (m, 7.2H), 7.30-7.28 (m, 2H), 7.24-7.22 (m, 5.4H), 3.87 (s, 3H), 3.86 (s, 8.0H), 3.71-3.68 (m, 5.8H), 3.64-3.57 (m, 15.8H), 3.24-3.18 (m, 1H), 3.07-3.02 (m, 2.7H), 2.78 (dd, *J*<sub>1</sub> = 6.0 Hz, *J*<sub>2</sub> = 13.2 Hz, 1H), 2.53-2.50 (m, 3.7H), 2.44-2.41 (m, 2.6H), 2.22-2.10 (m, 3.8H), 2.07-1.99 (m, 3.8Hz), 1.74 (s, 8.0H), 1.51 (s, 3H), 1.43 (s, 3H), 1.38 (s, 3H), 1.37 (s, 8.0H), 1.32 (s, 8.0H). <sup>13</sup>C NMR (150 MHz, CDCl<sub>3</sub>) of E/Z mixture δ 174.83, 168.38, 168.12, 166.76, 155.84,

155.36, 148.69, 133.90, 133.75, 133.70, 132.06, 131.94, 131.89, 129.73, 128.18, 127.57, 127.55, 123.18, 123.02, 122.99, 80.68, 80.62, 77.21, 77.00, 76.79, 51.93, 51.88, 43.03, 42.83, 41.11, 37.45, 37.20, 36.46, 33.98, 33.61, 29.92, 27.89, 24.14, 23.93, 23.88, 21.01, 20.74, 14.64. HRMS (ESI-TOF) Calcd for  $C_{27}H_{31}N_2O_7^+$   $[M+H]^+$ : 495.2126, found: 495.2120.

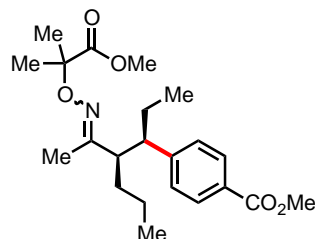

### Methyl

#### 4-(4-(1-(((1-methoxy-2-methyl-1-oxopropan-2-yl)oxy)imino)ethyl)heptan-3-yl)benzoate (2f-mono)

Substrate **1f** was arylated following the general arylation procedure at 80 °C. After purification by preparative thin-layer chromatography (Hexane : EtOAc = 5:1 as eluent), **2f-mono** E/Z (8.0:1) was obtained as a colorless oil (25.4 mg, 65%, d.r. > 20:1).  $^1H$  NMR (600 MHz,  $CDCl_3$ ) of E isomer (major)  $\delta$  7.91-7.90 (m, 2H), 7.15-7.14 (m, 2H), 3.89 (s, 3H), 3.65 (s, 3H), 2.59-2.52 (m, 2H), 1.95-1.89 (m, 1H), 1.69-1.63 (m, 1H), 1.52-1.39 (m, 2H), 1.47 (s, 3H), 1.33 (s, 3H), 1.30-1.25 (m, 1H), 1.25 (s, 3H), 1.20-1.11 (m, 1H), 0.89 (t,  $J = 7.2$  Hz, 3H), 0.67 (t,  $J = 7.2$  Hz, 3H).  $^{13}C$  NMR (150 MHz,  $CDCl_3$ ) of E isomer (major)  $\delta$  175.13, 167.17, 158.16, 149.07, 129.21, 128.71, 127.88, 80.50, 51.91, 51.80, 50.23, 49.58, 32.20, 26.48, 24.13, 23.80, 20.34, 13.92, 11.75, 11.65. HRMS (ESI-TOF) Calcd for  $C_{22}H_{34}NO_5^+$   $[M+H]^+$ : 392.2431, found: 392.2427.

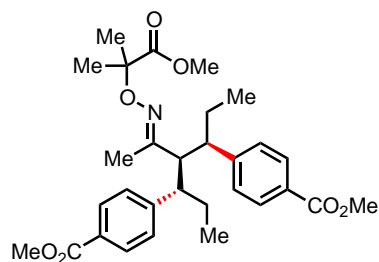

### Dimethyl

#### 4,4'-(4-((E)-1-(((1-methoxy-2-methyl-1-oxopropan-2-yl)oxy)imino)ethyl)heptane-3,5-diyl)dibenzoate (2f-di)

Substrate **1f** was arylated following the general arylation procedure at 80 °C. After purification by preparative thin-layer chromatography (Hexane : EtOAc = 5:1 as eluent), **2f-di** was obtained as a colorless oil (5.3 mg, 10%, d.r. > 20:1).  $^1H$  NMR (600 MHz,  $CDCl_3$ )  $\delta$  7.91-7.90 (m, 4H), 7.15-7.14 (m, 4H), 3.90 (s, 6H), 3.72 (s, 3H), 3.05 (t,  $J = 7.2$  Hz, 1H), 2.86-2.82 (m, 2H), 2.08-2.01 (m, 2H), 1.72-1.66 (m, 2H), 1.33 (s, 6H), 0.80 (t,  $J = 7.2$  Hz, 6H), 0.75 (s, 3H).  $^{13}C$  NMR (150 MHz,  $CDCl_3$ )  $\delta$  175.12, 167.08, 157.08, 148.06, 129.18, 128.20, 80.68, 53.55, 51.99, 51.91, 47.12, 27.28, 24.11, 15.03, 11.86. HRMS (ESI-TOF) Calcd for  $C_{30}H_{40}NO_7^+$   $[M+H]^+$ : 526.2799, found: 526.2792.

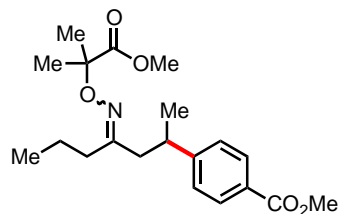

**Methyl 4-(4-(((1-methoxy-2-methyl-1-oxopropan-2-yl)oxy)imino)heptan-2-yl)benzoate (2g-mono)**

Substrate **1g** was arylated following the general arylation procedure at 120 °C. After purification by preparative thin-layer chromatography (Hexane : EtOAc = 5:1 as eluent), **2g-mono** E/Z (10:1) was obtained as a colorless oil (8.0 mg, 22%). <sup>1</sup>H NMR (600 MHz, CDCl<sub>3</sub>) of E isomer (major) δ 7.96-7.94 (m, 2H), 7.26-7.25 (m, 2H), 3.90 (s, 3H), 3.66 (s, 3H), 3.13 (sextet, *J* = 7.2 Hz, 1H), 2.48-2.45 (m, 1H), 2.40-2.36 (m, 1H), 2.32-2.26 (m, 1H), 2.19-2.14 (m, 1H), 1.52-1.46 (m, 2H), 1.41 (s, 3H), 1.40 (s, 3H), 1.23 (d, *J* = 7.2 Hz, 3H), 0.90 (t, *J* = 7.2 Hz, 3H). <sup>13</sup>C NMR (150 MHz, CDCl<sub>3</sub>) of E isomer (major) δ 175.04, 167.12, 159.02, 152.40, 129.71, 127.95, 126.99, 80.62, 51.95, 51.87, 41.97, 36.74, 30.41, 24.10, 24.03, 21.70, 19.08, 14.17. HRMS (ESI-TOF) Calcd for C<sub>20</sub>H<sub>30</sub>NO<sub>5</sub><sup>+</sup> [M+H]<sup>+</sup>: 364.2118, found: 364.2112.

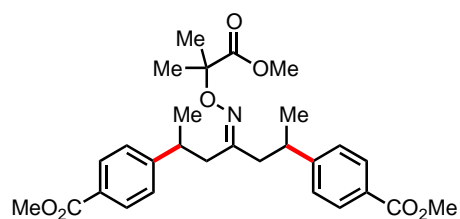

**Dimethyl**

**4,4'-(5-(((1-methoxy-2-methyl-1-oxopropan-2-yl)oxy)imino)nonane-3,7-diyl)dibenzoate (2g-di)**

Substrate **1g** was arylated following the general arylation procedure at 120 °C. After purification by preparative thin-layer chromatography (Hexane : EtOAc = 5:1 as eluent), **2g-di** was obtained as a colorless oil (29.9 mg, 60%, d.r. = 1:1). <sup>1</sup>H NMR (600 MHz, CDCl<sub>3</sub>) δ 7.95-7.93 (m, 4H), 7.92-7.90 (m, 4H), 7.26-7.24 (m, 4H), 7.15-7.12 (m, 4H), 3.92 (s, 3H), 3.91 (s, 3H), 3.90 (s, 3H), 3.89 (s, 3H), 3.67 (s, 3H), 3.65 (s, 3H), 3.28-3.21 (m, 2H), 3.07-3.00 (m, 2H), 2.63 (dd, *J*<sub>1</sub> = 7.2 Hz, *J*<sub>2</sub> = 13.2 Hz, 1H), 2.54-2.51 (m, 1H), 2.46-2.42 (m, 1H), 2.32 (dd, *J*<sub>1</sub> = 7.8 Hz, *J*<sub>2</sub> = 12.6 Hz, 1H), 2.25-2.21 (m, 1H), 2.20-2.10 (m, 3H), 1.45 (s, 3H), 1.41 (s, 3H), 1.39 (s, 3H), 1.38 (s, 3H), 1.26 (d, *J* = 7.2 Hz, 3H), 1.24 (d, *J* = 7.2 Hz, 3H), 1.13 (d, *J* = 6.6 Hz, 3H), 1.12 (d, *J* = 6.6 Hz, 3H). <sup>13</sup>C NMR (150 MHz, CDCl<sub>3</sub>) δ 174.78, 174.76, 167.05, 167.02, 167.00, 166.98, 157.04, 156.93, 152.13, 152.06, 151.61, 129.70, 129.65, 129.62, 128.22, 127.92, 127.89, 126.93, 126.88, 80.87, 80.84, 51.97, 51.92, 51.89, 51.86, 42.67, 42.66, 37.15, 37.12, 36.78, 36.77, 36.57, 36.52, 24.18, 24.14, 23.98, 23.88, 21.77, 21.71, 21.65, 21.55. HRMS (ESI-TOF) Calcd for C<sub>28</sub>H<sub>36</sub>NO<sub>7</sub><sup>+</sup> [M+H]<sup>+</sup>: 498.2486, found: 498.2482.



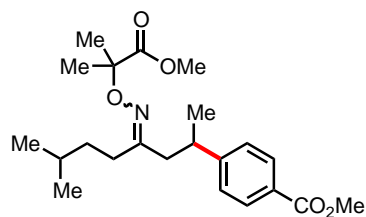

### Methyl

#### 4-(4-(((1-methoxy-2-methyl-1-oxopropan-2-yl)oxy)imino)-7-methyloctan-2-yl)benzoate (2h)

Substrate **1h** was arylated following the general arylation procedure at 120 °C. After purification by preparative thin-layer chromatography (Hexane : EtOAc = 5:1 as eluent), **2h** E/Z (1.1:1) was obtained as a colorless oil (25.5 mg, 65%). <sup>1</sup>H NMR (600 MHz, CDCl<sub>3</sub>) of E/Z mixture δ 7.97-7.94 (m, 4.5H), 7.31-7.29 (m, 2H), 7.27-7.25 (m, 2.6H), 3.90 (s, 3H), 3.89 (s, 3.3H), 3.70 (s, 3H), 3.66 (s, 3.3H), 3.29 (sextet, *J* = 7.2 Hz, 1H), 3.13 (sextet, *J* = 7.2 Hz, 1.1H), 2.66-2.62 (m, 1.1H), 2.49-2.45 (m, 2.3H), 2.40-2.36 (m, 1.1H), 2.32-2.27 (m, 1.3H), 2.20-2.15 (m, 1.2H), 1.94-1.89 (m, 1H), 1.87-1.82 (m, 1.3H), 1.52-1.40 (m, 17H), 1.33-1.21 (m, 12H), 0.89 (d, *J* = 6.6 Hz, 6.6H), 0.79 (t, *J* = 6.6 Hz, 6.1H). <sup>13</sup>C NMR (150 MHz, CDCl<sub>3</sub>) of E/Z mixture δ 174.99, 174.97, 167.07, 167.05, 159.44, 159.24, 152.36, 151.95, 129.69, 129.68, 126.97, 126.95, 80.70, 80.57, 51.95, 51.92, 51.83, 41.87, 36.84, 36.72, 36.60, 34.83, 34.49, 32.47, 28.06, 27.34, 26.44, 24.20, 24.06, 24.00, 22.29, 22.21, 21.70, 21.69. HRMS (ESI-TOF) Calcd for C<sub>22</sub>H<sub>34</sub>NO<sub>5</sub><sup>+</sup> [M+H]<sup>+</sup>: 392.2431, found: 392.2437.

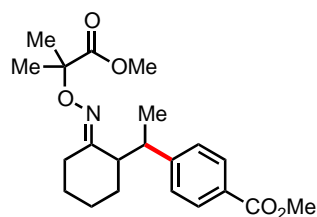

### (E)-Methyl

#### 4-(4-(((1-methoxy-2-methyl-1-oxopropan-2-yl)oxy)imino)pentan-2-yl)benzoate (2i)

Substrate **1i** was arylated following the general arylation procedure at 80 °C. After purification by preparative thin-layer chromatography (Hexane : EtOAc = 10:1 as eluent), **2i** was obtained as a colorless oil (25.5 mg, 68%, d.r. = 2:1). <sup>1</sup>H NMR (600 MHz, CDCl<sub>3</sub>) δ 7.93-7.89 (m, 3H), 7.30-7.28 (m, 1H), 7.23-7.20 (m, 2H), 3.89 (s, 1.5H), 3.88 (s, 3H), 3.64 (s, 3H), 3.60 (s, 1.5H), 3.10 (quintet, *J* = 7.2 Hz, 1H), 3.13-3.08 (m, 0.5H), 2.62 (ddd, *J*<sub>1</sub> = 4.2 Hz, *J*<sub>2</sub> = 7.2 Hz, *J*<sub>3</sub> = 13.6 Hz, 1H), 2.46 (td, *J*<sub>1</sub> = 4.8 Hz, *J*<sub>2</sub> = 7.8 Hz, 1H), 2.20-2.15 (m, 1H), 2.07-2.04 (m, 1H), 2.04-2.00 (m, 0.5H), 1.93-1.88 (m, 0.5H), 1.82-1.72 (m, 2H), 1.68-1.62 (m, 2.5H), 1.61-1.51 (m, 2.5H), 1.48-1.36 (m, 1.5H), 1.32 (s, 1.5H), 1.31 (s, 3H), 1.29 (d, *J* = 6.6 Hz, 1.5H), 1.27 (s, 3H), 1.23 (d, *J* = 6.6 Hz, 3H), 1.15 (s, 1.5H). <sup>13</sup>C NMR (150 MHz, CDCl<sub>3</sub>) δ 174.97, 167.17, 161.00, 160.86, 152.34, 150.84, 129.47, 129.35, 128.03, 127.69, 127.65, 80.49, 80.21, 51.92, 51.90, 51.86, 51.72, 48.01, 39.66, 38.85, 38.73, 29.21, 29.06, 28.15, 27.76, 26.24, 24.48, 24.42, 24.08, 23.84, 23.61, 23.29, 20.39, 20.18, 18.16. HRMS (ESI-TOF) Calcd for C<sub>21</sub>H<sub>30</sub>NO<sub>5</sub><sup>+</sup> [M+H]<sup>+</sup>: 376.2118, found: 376.2112.

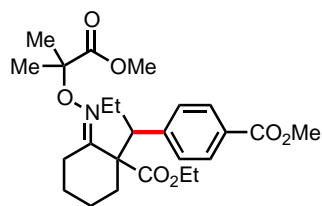

### Methyl

#### 4-(1-((*E*)-1-(ethoxycarbonyl)-2-(((1-methoxy-2-methyl-1-oxopropan-2-yl)oxy)imino)cyclohexylpropyl)benzoate (**2j**)

Substrate **1j** was arylated following the general arylation procedure at 100 °C. After purification by preparative thin-layer chromatography (Hexane : EtOAc = 5:1 as eluent), **2j** was obtained as a colorless oil (33.7 mg, 73%, d.r. = 2.4:1). <sup>1</sup>H NMR (600 MHz, CDCl<sub>3</sub>) δ 7.93-7.91 (m, 2H), 7.24-7.22 (m, 2H), 4.23-4.15 (m, 2H), 3.90 (s, 3H), 3.89 (s, 1.3H), 3.82-3.77 (m, 0.80H), 3.77 (s, 1.3H), 3.76 (s, 3H), 3.50-3.47 (m, 0.42H), 3.40-3.37 (m, 0.42H), 3.28-3.22 (m, 2H), 2.40-2.36 (m, 0.40H), 2.10-2.04 (m, 1H), 1.92-1.86 (m, 0.47H), 1.83-1.61 (m, 5.6H), 1.60 (s, 1.3H), 1.55 (s, 6H), 1.54 (s, 1.3H), 1.52-1.39 (m, 1.6H), 1.39-1.31 (m, 2.6H), 1.27 (t, *J* = 7.2 Hz, 3H), 1.24-1.19 (m, 1.1H), 1.06 (t, *J* = 7.2 Hz, 1.3H), 0.65 (t, *J* = 7.2 Hz, 1.3H), 0.62 (t, *J* = 7.2 Hz, 3H). <sup>13</sup>C NMR (150 MHz, CDCl<sub>3</sub>) δ 174.88, 174.79, 172.23, 171.88, 167.12, 167.03, 160.21, 157.55, 146.53, 146.23, 130.48, 129.77, 129.16, 128.87, 128.61, 128.51, 81.35, 81.28, 60.77, 58.58, 57.43, 51.93, 51.62, 50.52, 37.01, 25.89, 24.70, 24.58, 24.48, 24.40, 24.34, 24.16, 24.11, 23.88, 23.78, 22.97, 22.42, 14.17, 13.80, 12.81, 12.67. HRMS (ESI-TOF) Calcd for C<sub>25</sub>H<sub>36</sub>NO<sub>7</sub><sup>+</sup> [M+H]<sup>+</sup>: 462.2486, found: 462.2490.

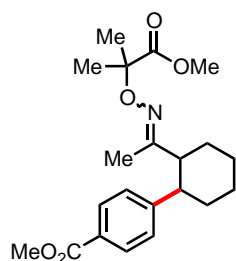

### Methyl

#### 4-(2-(1-(((1-methoxy-2-methyl-1-oxopropan-2-yl)oxy)imino)ethyl)cyclohexyl)benzoate (**2k**)

Substrate **1k** was arylated following the general arylation procedure at 80 °C. After purification by preparative thin-layer chromatography (Hexane : EtOAc = 10:1 as eluent), **2w** E/Z (7.8:1) was obtained as a colorless oil (27.0 mg, 72%). <sup>1</sup>H NMR (600 MHz, CDCl<sub>3</sub>) of E isomer (major) δ 7.92-7.90 (m, 2H), 7.20-7.18 (m, 2H), 3.89 (s, 1.5H), 3.88 (s, 3H), 3.62 (s, 3H), 2.72-2.68 (m, 1H), 2.56-2.52 (m, 1H), 1.88-1.81 (m, 4H), 1.62 (s, 3H), 1.47-1.38 (m, 4H), 1.28 (s, 3H), 1.20 (s, 3H). <sup>13</sup>C NMR (150 MHz, CDCl<sub>3</sub>) of E isomer (major) δ 174.94, 167.12, 159.73, 150.87, 129.58, 127.86, 127.53, 80.47, 51.91, 51.88, 49.02, 47.06, 35.40, 31.13, 26.38, 25.76, 24.11, 23.71, 12.12. HRMS (ESI-TOF) Calcd for C<sub>21</sub>H<sub>30</sub>NO<sub>5</sub><sup>+</sup> [M+H]<sup>+</sup>: 376.2118, found: 376.2111.

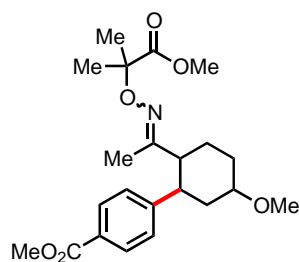

### Methyl

#### 4-((5-methoxy-2-(1-(((1-methoxy-2-methyl-1-oxopropan-2-yl)oxy)imino)ethyl)cyclohexyl)benzoate (21)

Substrate **11** was arylated following the general arylation procedure at 80 °C. After purification by preparative thin-layer chromatography (Hexane : EtOAc = 5:1 as eluent), **2x** E/Z (>20:1) was obtained as a colorless oil (27.1 mg, 67%). <sup>1</sup>H NMR (600 MHz, CDCl<sub>3</sub>) of E isomer (major) δ 7.95-7.93 (m, 2H), 7.30-7.28 (m, 2H), 3.90 (s, 3H), 3.74 (s, 3H), 3.37 (s, 3H), 3.29-3.24 (m, 1H), 2.95-2.92 (m, 1H), 2.77-2.75 (m, 1H), 2.27-2.21 (m, 1H), 2.10-2.08 (m, 1H), 2.01-1.98 (m, 1H), 1.89-1.87 (m, 1H), 1.75-1.68 (m, 1H), 1.66-1.62 (m, 1H), 1.46 (s, 3H), 1.44 (s, 3H), 1.38 (s, 3H). <sup>13</sup>C NMR (150 MHz, CDCl<sub>3</sub>) of E isomer (major) δ 174.84, 167.14, 157.59, 149.24, 129.32, 127.83, 127.66, 80.95, 79.81, 55.48, 52.16, 51.94, 46.03, 43.88, 31.21, 27.96, 26.65, 24.26, 24.21, 16.42. HRMS (ESI-TOF) Calcd for C<sub>20</sub>H<sub>32</sub>NO<sub>6</sub><sup>+</sup> [M+H]<sup>+</sup>: 406.2224, found: 406.2220.

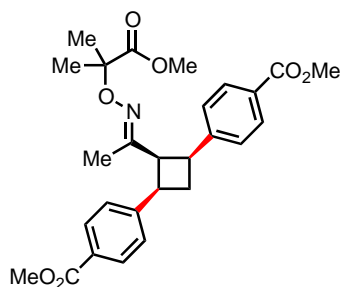

### Dimethyl

#### 4,4'-(2-((E)-1-(((1-methoxy-2-methyl-1-oxopropan-2-yl)oxy)imino)ethyl)cyclobutane-1,3-diyl)dibenzoate (2m-cis)

Substrate **1m** was arylated following the general arylation procedure at 80 °C. After purification by preparative thin-layer chromatography (Hexane : EtOAc = 5:1 as eluent), **2m-cis** was obtained as a colorless oil (20.7 mg, 43%). The assignment of cis/trans structure was based on <sup>1</sup>H NMR patterns by comparing with literatures.<sup>2</sup> <sup>1</sup>H NMR (600 MHz, CDCl<sub>3</sub>) δ 7.96-7.94 (m, 4H), 7.21-7.20 (m, 4H), 4.07-3.99 (m, 3H), 3.90 (s, 6H), 3.70 (s, 3H), 3.00 (q, *J* = 10.8 Hz, 1H), 2.81-2.76 (m, 1H), 1.20 (s, 6H), 1.04 (s, 3H). <sup>13</sup>C NMR (150 MHz, CDCl<sub>3</sub>) δ 174.66, 167.11, 155.16, 146.92, 129.36, 127.70, 126.66, 80.62, 51.95, 51.84, 51.72, 38.45, 29.89, 23.92, 15.38. HRMS (ESI-TOF) Calcd for C<sub>27</sub>H<sub>32</sub>NO<sub>7</sub><sup>+</sup> [M+H]<sup>+</sup>: 482.2173, found: 482.2170.

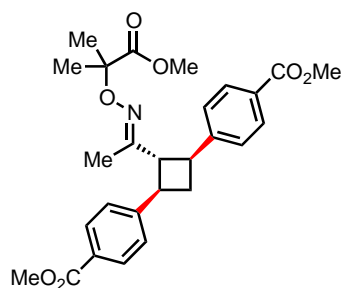

### Dimethyl

#### 4,4'-(2-((*E*)-1-(((1-methoxy-2-methyl-1-oxopropan-2-yl)oxy)imino)ethyl)cyclobutane-1,3-diyl)dibenzoate (2m-trans)

Substrate **1m** was arylated following the general arylation procedure at 80 °C. After purification by preparative thin-layer chromatography (Hexane : EtOAc = 5:1 as eluent), **2m-trans** was obtained as a colorless oil (18.3 mg, 38%). The assignment of cis/trans structure was based on <sup>1</sup>H NMR patterns by comparing with literatures.<sup>2</sup> <sup>1</sup>H NMR (600 MHz, CDCl<sub>3</sub>) δ 7.99-7.98 (m, 4H), 7.35-7.33 (m, 4H), 3.91 (s, 6H), 3.67 (s, 3H), 3.61 (q, *J* = 9.6 Hz, 2H), 3.12 (t, *J* = 9.6 Hz, 1H), 2.75-2.71 (m, 1H), 2.28 (q, *J* = 10.2 Hz, 1H), 1.73 (s, 3H), 1.51 (s, 6H). <sup>13</sup>C NMR (150 MHz, CDCl<sub>3</sub>) δ 174.76, 166.96, 157.18, 148.70, 129.74, 128.33, 126.84, 81.25, 55.34, 52.02, 52.01, 40.29, 32.62, 24.13, 13.06. HRMS (ESI-TOF) Calcd for C<sub>27</sub>H<sub>32</sub>NO<sub>7</sub><sup>+</sup> [M+H]<sup>+</sup>: 482.2173, found: 482.2175.

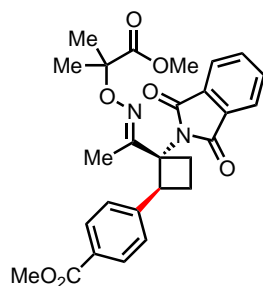

### Methyl

#### 4-(2-(1,3-dioxoisindolin-2-yl)-2-((*E*)-1-(((1-methoxy-2-methyl-1-oxopropan-2-yl)oxy)imino)ethyl)cyclobutyl)benzoate (2n-mono)

Substrate **1n** was arylated following the general arylation procedure at 80 °C. After purification by preparative thin-layer chromatography (Hexane : EtOAc = 2:1 as eluent), **2n-mono** was obtained as a colorless oil (15.3 mg, 31%). <sup>1</sup>H NMR (600 MHz, CDCl<sub>3</sub>) δ 8.01-7.99 (m, 2H), 7.82-7.80 (m, 2H), 7.73-7.71 (m, 2H), 7.62-7.61 (m, 2H), 4.68-4.65 (m, 1H), 3.92 (s, 3H), 3.76 (s, 3H), 3.24 (t, *J* = 7.8 Hz, 1H), 2.41-2.31 (m, 3H), 1.54 (s, 3H), 1.52 (s, 3H), 1.27 (s, 3H). <sup>13</sup>C NMR (150 MHz, CDCl<sub>3</sub>) δ 174.68, 167.97, 167.21, 153.20, 145.09, 134.12, 131.82, 129.26, 129.05, 128.47, 123.10, 81.87, 67.27, 52.00, 46.38, 28.99, 24.38, 23.90, 23.63, 12.24. HRMS (ESI-TOF) Calcd for C<sub>27</sub>H<sub>29</sub>N<sub>2</sub>O<sub>7</sub><sup>+</sup> [M+H]<sup>+</sup>: 493.1969, found: 493.1963.

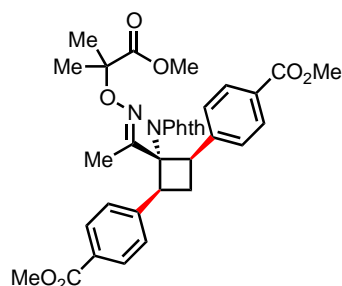

### Dimethyl

#### 4,4'-(2-(1,3-dioxoisindolin-2-yl)-2-((*E*)-1-(((1-methoxy-2-methyl-1-oxopropan-2-yl)oxy)imino)ethyl)cyclobutane-1,3-diyl)dibenzoate (**2n-di**)

Substrate **1n** was arylated following the general arylation procedure at 80 °C. After purification by preparative thin-layer chromatography (Hexane : EtOAc = 2:1 as eluent), **2n-di** was obtained as a colorless oil (30.7 mg, 49%). <sup>1</sup>H NMR (600 MHz, CDCl<sub>3</sub>) δ 7.98-7.96 (m, 4H), 7.88-7.86 (m, 2H), 7.79-7.77 (m, 2H), 7.49-7.47 (m, 4H), 4.83 (t, *J* = 9.6 Hz, 2H), 3.90 (s, 6H), 3.68 (s, 3H), 3.08 (q, *J* = 10.8 Hz, 1H), 2.85 (q, *J* = 10.8 Hz, 1H), 1.21 (s, 6H), 0.99 (s, 3H). <sup>13</sup>C NMR (150 MHz, CDCl<sub>3</sub>) δ 174.27, 168.92, 167.14, 152.48, 145.81, 134.40, 131.54, 129.04, 128.03, 127.98, 123.20, 81.59, 71.98, 51.98, 51.84, 44.14, 23.91, 14.72. HRMS (ESI-TOF) Calcd for C<sub>35</sub>H<sub>35</sub>N<sub>2</sub>O<sub>9</sub><sup>+</sup> [M+H]<sup>+</sup>: 627.2337, found: 627.2330.

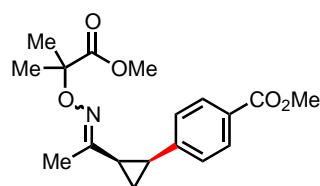

### Methyl

#### 4-(2-((*E*)-1-(((1-methoxy-2-methyl-1-oxopropan-2-yl)oxy)imino)ethyl)cyclopropyl)benzoate (**2o**)

Substrate **1o** was arylated following the general arylation procedure at 120 °C. After purification by preparative thin-layer chromatography (Hexane : EtOAc = 5:1 as eluent), **2o** E/Z (6.7:1) was obtained as a colorless oil (15.0 mg, 45%). <sup>1</sup>H NMR (600 MHz, CDCl<sub>3</sub>) δ 7.89-7.88 (m, 2H), 7.19-7.18 (m, 2H), 3.89 (s, 3H), 3.74 (s, 3H), 2.41-2.37 (m, 1H), 2.02-1.98 (m, 1H), 1.66 (q, *J* = 6.0 Hz, 1H), 1.52 (s, 6H), 1.40 (s, 3H), 1.38 (s, 3H), 1.23-1.19 (m, 1H). <sup>13</sup>C NMR (150 MHz, CDCl<sub>3</sub>) δ 174.90, 167.16, 154.11, 143.70, 129.12, 128.13, 127.82, 80.75, 52.01, 51.95, 26.10, 24.33, 24.05, 23.03, 15.69, 9.31. HRMS (ESI-TOF) Calcd for C<sub>18</sub>H<sub>24</sub>NO<sub>5</sub><sup>+</sup> [M+H]<sup>+</sup>: 334.1649, found: 334.1642.

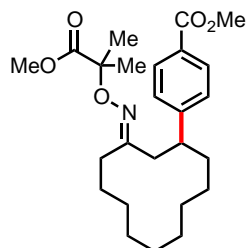

### (*E*)-Methyl

**4-(3-(((1-methoxy-2-methyl-1-oxopropan-2-yl)oxy)imino)cyclododecyl)benzoate  
(2p-mono-E)**

Substrate **1p** was arylated following the general arylation procedure at 120 °C. After purification by preparative thin-layer chromatography (Hexane : EtOAc = 10:1 as eluent), **2p-mono-E** was obtained as a colorless oil (20.7 mg, 48% including **2p-mono-Z**). <sup>1</sup>H NMR (600 MHz, CDCl<sub>3</sub>) δ 7.98-7.96 (m, 2H), 7.32-7.30 (m, 2H), 3.91 (s, 3H), 3.72 (s, 3H), 3.22 (t, *J* = 12.0 Hz, 1H), 3.02-2.97 (m, 1H), 2.48-2.42 (m, 1H), 2.22-2.17 (m, 1H), 1.99-1.93 (m, 2H), 1.83-1.77 (m, 1H), 1.61-1.53 (m, 3H), 1.50 (s, 3H), 1.47 (s, 3H), 1.44-1.08 (m, 13H). <sup>13</sup>C NMR (150 MHz, CDCl<sub>3</sub>) δ 175.09, 167.08, 157.14, 151.11, 129.76, 128.23, 127.61, 80.89, 51.99, 40.66, 35.20, 30.64, 30.36, 25.83, 24.34, 24.16, 24.04, 23.19, 22.90, 22.56, 22.42. HRMS (ESI-TOF) Calcd for C<sub>25</sub>H<sub>38</sub>NO<sub>5</sub><sup>+</sup> [M+H]<sup>+</sup>: 432.2744, found: 432.2740.

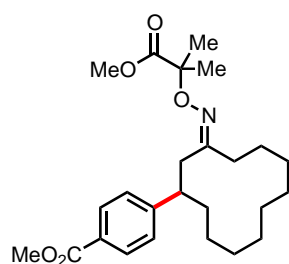

**(Z)-Methyl**

**4-(3-(((1-methoxy-2-methyl-1-oxopropan-2-yl)oxy)imino)cyclododecyl)benzoate  
(2p-mono-Z)**

Substrate **1p** was arylated following the general arylation procedure at 120 °C. After purification by preparative thin-layer chromatography (Hexane : EtOAc = 10:1 as eluent), **2p-mono-Z** was obtained as a colorless oil (20.7 mg, 48% including **2p-mono-E**). <sup>1</sup>H NMR (600 MHz, CDCl<sub>3</sub>) δ 7.96-7.94 (m, 2H), 7.28-7.26 (m, 2H), 3.90 (s, 3H), 3.68 (s, 3H), 3.30-3.25 (m, 1H), 2.69 (dd, *J*<sub>1</sub> = 10.2 Hz, *J*<sub>2</sub> = 15.0 Hz, 1H), 2.55-2.51 (m, 1H), 2.38-2.34 (m, 1H), 2.30 (dd, *J*<sub>1</sub> = 4.2 Hz, *J*<sub>2</sub> = 15.0 Hz, 1H), 1.78-1.72 (m, 1H), 1.69-1.64 (m, 2H), 1.57-1.52 (m, 1H), 1.48 (s, 3H), 1.46 (s, 3H), 1.42-1.30 (m, 11H), 1.12-1.06 (m, 1H). <sup>13</sup>C NMR (150 MHz, CDCl<sub>3</sub>) δ 175.12, 167.13, 158.21, 151.17, 129.58, 127.91, 127.57, 80.80, 51.96, 39.79, 38.07, 30.66, 27.47, 25.47, 24.68, 24.43, 24.23, 24.18, 23.80, 22.93, 22.77, 21.50. HRMS (ESI-TOF) Calcd for C<sub>25</sub>H<sub>38</sub>NO<sub>5</sub><sup>+</sup> [M+H]<sup>+</sup>: 432.2744, found: 432.2745.

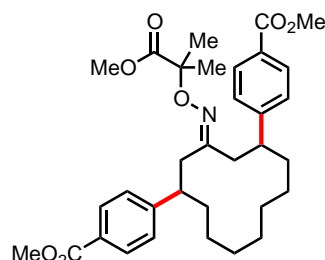

**Dimethyl**

**4,4'-(3-(((1-methoxy-2-methyl-1-oxopropan-2-yl)oxy)imino)cyclododecane-1,5-diyl)dibenzoate (2p-di)**

Substrate **1p** was arylated following the general arylation procedure at 120 °C. After

purification by preparative thin-layer chromatography (Hexane : EtOAc = 10:1 as eluent), **2p-di** was obtained as a colorless oil (22.6 mg, 40%). <sup>1</sup>H NMR (600 MHz, CDCl<sub>3</sub>) δ 8.02-7.98 (m, 4H), 7.37-7.32 (m, 4H), 3.92 (s, 3H), 3.91 (s, 3H), 3.73 (s, 3H), 3.20 (t, *J* = 12.6 Hz, 1H), 3.13-3.04 (m, 2H), 2.65 (dd, *J*<sub>1</sub> = 10.8 Hz, *J*<sub>2</sub> = 14.4 Hz, 1H), 2.45 (dd, *J*<sub>1</sub> = 3.6 Hz, *J*<sub>2</sub> = 14.4 Hz, 1H), 2.10 (dd, *J*<sub>1</sub> = 3.0 Hz, *J*<sub>2</sub> = 12.6 Hz, 1H), 2.03-1.95 (m, 2H), 1.71-1.67 (m, 1H), 1.56 (s, 3H), 1.52 (s, 3H), 1.49-1.13 (m, 13H). <sup>13</sup>C NMR (150 MHz, CDCl<sub>3</sub>) δ 174.87, 167.04, 167.01, 156.54, 151.09, 150.97, 129.89, 129.76, 128.40, 128.20, 127.50, 127.36, 81.07, 52.03, 52.01, 51.98, 42.80, 42.75, 42.33, 36.94, 30.37, 29.52, 24.29, 24.23, 24.19, 23.61, 23.37, 22.26, 21.49. HRMS (ESI-TOF) Calcd for C<sub>33</sub>H<sub>44</sub>NO<sub>7</sub><sup>+</sup> [M+H]<sup>+</sup>: 566.3112, found: 566.3117.

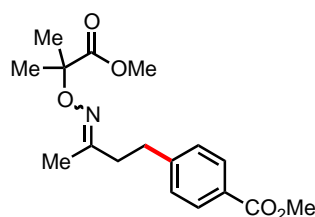

#### Methyl 4-(3-(((1-methoxy-2-methyl-1-oxopropan-2-yl)oxy)imino)butyl)benzoate (**2q**)

Substrate **1q** was arylated following the general arylation procedure at 80 °C except the use of PhCF<sub>3</sub> as solvent instead of HFIP. After purification by preparative thin-layer chromatography (Hexane : EtOAc = 5:1 as eluent), **2q** E/Z (2.7:1) was obtained as a colorless oil (24.4 mg, 76%). <sup>1</sup>H NMR (600 MHz, CDCl<sub>3</sub>) of E isomer (major) δ 7.95-7.93 (m, 2H), 7.25-7.24 (m, 2H), 3.90 (s, 3H), 3.68 (s, 3H), 2.88-2.85 (m, 2H), 2.50-2.48 (m, 2H), 1.87 (s, 3H), 1.44 (s, 6H). <sup>1</sup>H NMR (600 MHz, CDCl<sub>3</sub>) of Z isomer (minor) δ 7.97-7.95 (m, 2H), 7.29-7.28 (m, 2H), 3.91 (s, 3.6H), 3.90 (s, 3H), 3.73 (s, 3H), 2.91-2.88 (m, 2H), 2.65-2.62 (m, 2H), 1.75 (s, 3H), 1.48 (s, 6H). <sup>13</sup>C NMR (150 MHz, CDCl<sub>3</sub>) of E/Z mixture δ 174.91, 167.06, 157.26, 156.56, 146.84, 129.71, 129.64, 128.40, 128.04, 127.90, 80.73, 80.54, 51.97, 51.94, 36.99, 32.14, 31.58, 30.98, 24.16, 24.12, 20.47, 14.59. HRMS (ESI-TOF) Calcd for C<sub>17</sub>H<sub>24</sub>NO<sub>5</sub><sup>+</sup> [M+H]<sup>+</sup>: 322.1649, found: 322.1658.

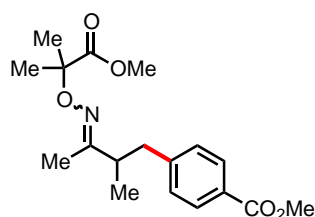

#### Methyl

#### 4-(3-(((1-methoxy-2-methyl-1-oxopropan-2-yl)oxy)imino)-2-methylbutyl)benzoate (**2r-mono**)

Substrate **1r** was arylated following the general arylation procedure at 80 °C except the use of PhCF<sub>3</sub> as solvent instead of HFIP. After purification by preparative thin-layer chromatography (Hexane : EtOAc = 5:1 as eluent), **2r-mono** E/Z (8.3:1) was obtained as a colorless oil (10.4 mg, 31%). <sup>1</sup>H NMR (600 MHz, CDCl<sub>3</sub>) of E isomer (major) δ 7.94-7.92 (m, 2H), 7.21-7.20 (m, 2H), 3.90 (s, 3H), 3.66 (s, 3H), 2.92-2.87 (m, 1H), 2.70-2.62 (m, 2H), 1.82

(s, 3H), 1.42 (s, 3H), 1.38 (s, 3H), 1.05 (d,  $J = 6.6$  Hz, 3H).  $^{13}\text{C}$  NMR (150 MHz,  $\text{CDCl}_3$ ) of E isomer (major)  $\delta$  174.93, 167.11, 160.18, 145.80, 129.52, 129.02, 127.92, 80.76, 51.96, 51.89, 41.22, 40.12, 24.16, 23.96, 17.89, 12.24. HRMS (ESI-TOF) Calcd for  $\text{C}_{18}\text{H}_{26}\text{NO}_5^+$   $[\text{M}+\text{H}]^+$ : 336.1805, found: 336.1812.

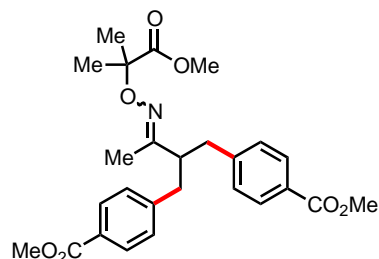

### Dimethyl

#### 4,4'-(2-(1-((1-methoxy-2-methyl-1-oxopropan-2-yl)oxy)imino)ethyl)propane-1,3-diyl)dibenzoate (**2r-di**)

Substrate **1r** was arylated following the general arylation procedure at 80 °C except the use of  $\text{PhCF}_3$  as solvent instead of HFIP. After purification by preparative thin-layer chromatography (Hexane : EtOAc = 5:1 as eluent), **2r-di** E/Z (7.3:1) was obtained as a colorless oil (25.9 mg, 55%).  $^1\text{H}$  NMR (600 MHz,  $\text{CDCl}_3$ ) of E isomer (major)  $\delta$  7.94-7.92 (m, 4H), 7.19-7.18 (m, 4H), 3.89 (s, 6H), 3.59 (s, 3H), 2.92-2.86 (m, 3H), 2.79-2.76 (m, 2H), 1.70 (s, 3H), 1.32 (s, 6H).  $^{13}\text{C}$  NMR (150 MHz,  $\text{CDCl}_3$ ) of E isomer (major)  $\delta$  174.79, 166.99, 157.63, 145.00, 129.60, 128.97, 128.13, 80.84, 51.97, 51.88, 48.32, 38.79, 23.99, 13.22. HRMS (ESI-TOF) Calcd for  $\text{C}_{26}\text{H}_{32}\text{NO}_7^+$   $[\text{M}+\text{H}]^+$ : 470.2173, found: 470.2180.

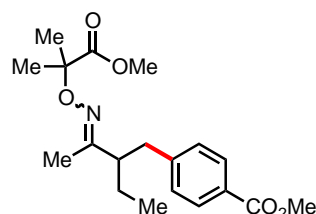

#### Methyl 4-(2-ethyl-3-((1-methoxy-2-methyl-1-oxopropan-2-yl)oxy)imino)butylbenzoate (**2s**)

Substrate **1s** was arylated following the general arylation procedure at 80 °C except the use of  $\text{PhCF}_3$  as solvent instead of HFIP. After purification by preparative thin-layer chromatography (Hexane : EtOAc = 5:1 as eluent), **2s** E/Z (9.1:1) was obtained as a colorless oil (28.6 mg, 82%).  $^1\text{H}$  NMR (600 MHz,  $\text{CDCl}_3$ ) of E isomer (major)  $\delta$  7.93-7.92 (m, 2H), 7.20-7.19 (m, 2H), 3.89 (s, 3H), 3.64 (s, 3H), 2.82-2.72 (m, 2H), 2.51 (quintet,  $J = 7.2$  Hz, 1H), 1.75 (s, 3H), 1.48 (quintet,  $J = 7.2$  Hz, 2H), 1.42 (s, 3H), 1.37 (s, 3H), 0.82 (t,  $J = 7.2$  Hz, 3H).  $^{13}\text{C}$  NMR (150 MHz,  $\text{CDCl}_3$ ) of E isomer (major)  $\delta$  175.02, 167.11, 158.57, 145.76, 129.50, 128.97, 127.88, 80.71, 51.95, 51.86, 48.02, 38.50, 24.90, 24.13, 23.92, 11.77, 11.28. HRMS (ESI-TOF) Calcd for  $\text{C}_{19}\text{H}_{28}\text{NO}_5^+$   $[\text{M}+\text{H}]^+$ : 350.1962, found: 350.1961.



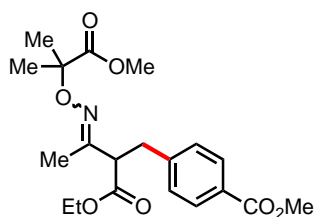

### Methyl

#### 4-(2-(ethoxycarbonyl)-3-(((1-methoxy-2-methyl-1-oxopropan-2-yl)oxy)imino)butyl)benzoate (2t)

Substrate **1t** was arylated following the general arylation procedure at 120 °C. After purification by preparative thin-layer chromatography (Hexane : EtOAc = 5:1 as eluent), **2t** E/Z (3.9:1) was obtained as a colorless oil (31.4 mg, 80%). <sup>1</sup>H NMR (600 MHz, CDCl<sub>3</sub>) of E isomer (major) δ 7.94-7.92 (m, 2H), 7.25-7.23 (m, 2H), 4.15-4.06 (m, 2H), 3.90 (s, 3H), 3.66 (s, 3H), 3.57 (t, *J* = 7.8 Hz, 2H), 3.23 (dd, *J*<sub>1</sub> = 7.8 Hz, *J*<sub>2</sub> = 14.4 Hz, 1H), 3.04 (dd, *J*<sub>1</sub> = 7.8 Hz, *J*<sub>2</sub> = 14.4 Hz, 1H), 1.88 (s, 3H), 1.44 (s, 3H), 1.39 (s, 3H), 1.19 (t, *J* = 7.2 Hz, 3H). <sup>13</sup>C NMR (150 MHz, CDCl<sub>3</sub>) of E/Z mixture δ 174.54, 174.47, 170.99, 170.87, 167.00, 166.97, 154.02, 153.52, 144.41, 144.01, 129.65, 129.04, 128.93, 128.36, 81.31, 81.13, 61.09, 60.99, 52.84, 52.02, 51.99, 51.95, 47.22, 34.90, 24.10, 24.08, 24.02, 23.90, 14.06, 14.04, 12.96. HRMS (ESI-TOF) Calcd for C<sub>20</sub>H<sub>28</sub>NO<sub>7</sub><sup>+</sup> [M+H]<sup>+</sup>: 394.1860, found: 394.1862.

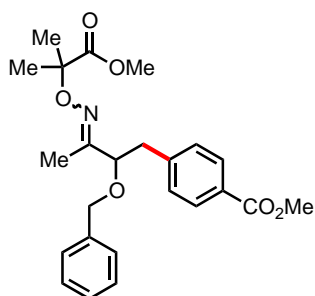

### Methyl

#### 4-(2-(benzyloxy)-3-(((1-methoxy-2-methyl-1-oxopropan-2-yl)oxy)imino)butyl)benzoate (2u)

Substrate **1u** was arylated following the general arylation procedure at 100 °C. After purification by preparative thin-layer chromatography (Hexane : EtOAc = 5:1 as eluent), **2u** E/Z (12:1) was obtained as a colorless oil (17.1 mg, 40%). <sup>1</sup>H NMR (600 MHz, CDCl<sub>3</sub>) of E isomer (major) δ 7.93-7.92 (m, 2H), 7.27-7.23 (m, 5H), 7.14-7.13 (m, 2H), 4.43 (d, *J* = 12.0 Hz, 1H), 4.22 (d, *J* = 12.0 Hz, 1H), 4.12 (dd, *J*<sub>1</sub> = 6.0 Hz, *J*<sub>2</sub> = 8.4 Hz, 1H), 3.91 (s, 3H), 3.66 (s, 3H), 3.06 (dd, *J*<sub>1</sub> = 8.4 Hz, *J*<sub>2</sub> = 13.8 Hz, 1H), 2.85 (dd, *J*<sub>1</sub> = 6.0 Hz, *J*<sub>2</sub> = 13.8 Hz, 1H), 1.91 (s, 3H), 1.48 (s, 3H), 1.41 (s, 3H). <sup>13</sup>C NMR (150 MHz, CDCl<sub>3</sub>) of E isomer (major) δ 174.62, 167.09, 156.91, 143.08, 129.53, 129.48, 129.41, 128.28, 128.24, 127.67, 127.63, 81.18, 80.15, 70.42, 52.00, 39.40, 24.19, 23.91, 9.53. HRMS (ESI-TOF) Calcd for C<sub>24</sub>H<sub>30</sub>NO<sub>6</sub><sup>+</sup> [M+H]<sup>+</sup>: 428.2068, found: 428.2067.

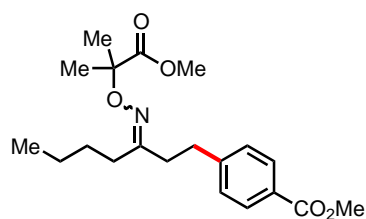

#### Methyl 4-(3-(((1-methoxy-2-methyl-1-oxopropan-2-yl)oxy)imino)heptyl)benzoate (**2v**)

Substrate **1v** was arylated following the general arylation procedure at 80 °C except the use of PhCF<sub>3</sub> as solvent instead of HFIP. After purification by preparative thin-layer chromatography (Hexane : EtOAc = 5:1 as eluent), **2v** E/Z (1.2:1) was obtained as a colorless oil (27.2 mg, 75%). <sup>1</sup>H NMR (600 MHz, CDCl<sub>3</sub>) of E/Z mixture δ 7.97-7.93 (m, 4.5H), 7.29-7.28 (m, 2.4H), 7.26-7.24 (m, 2H), 3.91 (s, 3.6H), 3.90 (s, 3H), 3.72 (s, 3.6H), 3.68 (s, 3H), 2.91-2.89 (m, 2.4H), 2.87-2.84 (m, 2H), 2.59-2.57 (m, 2.4H), 2.49-2.46 (m, 2H), 2.33-2.30 (m, 2H), 2.06-2.04 (m, 2.4H), 1.49 (s, 7.2H), 1.45 (s, 6H), 1.48-1.39 (m, 4.4H), 1.36-1.31 (m, 2H), 1.29-1.25 (m, 2.5H), 0.91 (t, *J* = 7.2 Hz, 3H), 0.86 (t, *J* = 7.2 Hz, 3.6H). <sup>13</sup>C NMR (150 MHz, CDCl<sub>3</sub>) of E/Z mixture δ 174.98, 174.96, 167.10, 167.07, 159.91, 159.88, 147.24, 147.14, 129.78, 129.70, 129.61, 128.40, 128.37, 127.99, 80.67, 80.66, 51.96, 51.93, 51.88, 51.86, 35.19, 34.17, 32.04, 31.80, 30.04, 29.64, 28.23, 28.08, 27.80, 25.83, 24.12, 24.08, 22.65, 22.08, 13.78, 13.75. HRMS (ESI-TOF) Calcd for C<sub>20</sub>H<sub>30</sub>NO<sub>5</sub><sup>+</sup> [M+H]<sup>+</sup>: 364.2118, found: 364.2113.

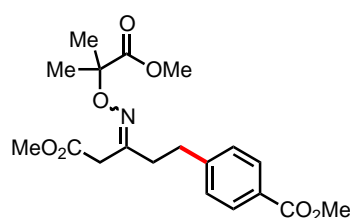

#### Methyl

#### 4-(5-methoxy-3-(((1-methoxy-2-methyl-1-oxopropan-2-yl)oxy)imino)-5-oxopentyl)benzoate (**2w**)

Substrate **1w** was arylated following the general arylation procedure at 80 °C. After purification by preparative thin-layer chromatography (Hexane : EtOAc = 5:1 as eluent), **2w** E/Z (1.8:1) was obtained as a colorless oil (29.9 mg, 79%). <sup>1</sup>H NMR (600 MHz, CDCl<sub>3</sub>) of E/Z mixture δ 7.97-7.94 (m, 3.1H), 7.29-7.25 (m, 3.1H), 3.91 (s, 1.6H), 3.90 (s, 3H), 3.72 (s, 1.6H), 3.69 (s, 3H), 3.68 (s, 4.6H), 3.34 (s, 2H), 3.08 (s, 1.1H), 2.94-2.90 (m, 3.2H), 2.73-2.70 (m, 1.1H), 2.63-2.60 (m, 2H), 1.50 (s, 3.5H), 1.44 (s, 6H). <sup>13</sup>C NMR (150 MHz, CDCl<sub>3</sub>) of E/Z mixture δ 174.52, 174.44, 169.98, 169.24, 167.06, 167.03, 154.12, 152.52, 146.63, 129.78, 129.66, 128.41, 128.38, 128.14, 127.96, 81.33, 52.03, 52.00, 51.96, 39.95, 35.85, 34.68, 31.69, 31.34, 30.16, 24.06, 23.99. HRMS (ESI-TOF) Calcd for C<sub>19</sub>H<sub>26</sub>NO<sub>7</sub><sup>+</sup> [M+H]<sup>+</sup>: 380.1704, found: 380.1700.

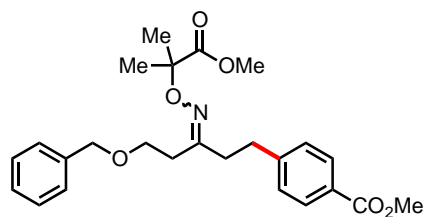

### Methyl

#### 4-(5-(benzyloxy)-3-(((1-methoxy-2-methyl-1-oxopropan-2-yl)oxy)imino)pentyl)benzoate (2x)

Substrate **1x** was arylated following the general arylation procedure at 100 °C. After purification by preparative thin-layer chromatography (Hexane : EtOAc = 5:1 as eluent), **2x** E/Z (1:1.2) was obtained as a colorless oil (30.9 mg, 70%). <sup>1</sup>H NMR (600 MHz, CDCl<sub>3</sub>) of E/Z mixture δ 7.95-7.91 (m, 3.7H), 7.35-7.28 (m, 5.1H), 7.25-7.23 (m, 1.7H), 7.22-7.20 (m, 2H), 4.50 (s, 2H), 4.47 (s, 1.7H), 3.91 (s, 2.5H), 3.90 (s, 3H), 3.69 (s, 2.4H), 3.68-3.67 (m, 2H), 3.66 (s, 3H), 3.61-3.59 (m, 1.7H), 2.91-2.88 (m, 1.8H), 2.88-2.85 (m, 2H), 2.67-2.65 (m, 2H), 2.64-2.62 (m, 1.8H), 2.57-2.54 (m, 2H), 2.40-2.38 (m, 1.7H), 1.48 (s, 5.5H), 1.43 (s, 5.5H). <sup>13</sup>C NMR (150 MHz, CDCl<sub>3</sub>) of E/Z mixture δ 174.82, 167.13, 167.08, 157.87, 157.65, 147.18, 146.98, 138.22, 129.73, 129.61, 128.43, 128.41, 128.37, 128.35, 128.03, 127.80, 127.63, 127.60, 127.58, 127.55, 80.89, 80.88, 72.94, 72.83, 67.31, 66.58, 51.99, 51.96, 51.93, 36.06, 34.87, 31.90, 31.61, 30.52, 29.66, 24.11, 24.09. HRMS (ESI-TOF) Calcd for C<sub>25</sub>H<sub>32</sub>NO<sub>6</sub><sup>+</sup> [M+H]<sup>+</sup>: 442.2224, found: 442.2228.

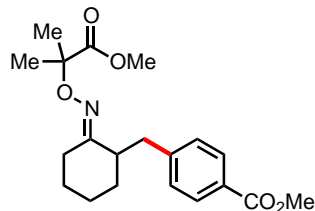

### (E)-Methyl

#### 4-((2-(((1-methoxy-2-methyl-1-oxopropan-2-yl)oxy)imino)cyclohexyl)methyl)benzoate (2y)

Substrate **1y** was arylated following the general arylation procedure at 80 °C except the use of PhCF<sub>3</sub> as solvent instead of HFIP. After purification by preparative thin-layer chromatography (Hexane : EtOAc = 5:1 as eluent), **2y** E/Z (>20:1) was obtained as a colorless oil (28.2 mg, 78%). <sup>1</sup>H NMR (600 MHz, CDCl<sub>3</sub>) δ 7.93-7.92 (m, 2H), 7.22-7.21 (m, 2H), 3.89 (s, 3H), 3.68 (s, 3H), 3.14 (dd, *J*<sub>1</sub> = 6.0 Hz, *J*<sub>2</sub> = 13.8 Hz, 1H), 3.05-3.01 (m, 1H), 2.54 (dd, *J*<sub>1</sub> = 7.8 Hz, *J*<sub>2</sub> = 13.8 Hz, 1H), 2.49-2.45 (m, 1H), 2.00-1.95 (m, 1H), 1.79-1.72 (m, 3H), 1.53-1.39 (m, 2H), 1.45 (s, 3H), 1.44 (s, 3H), 1.31-1.26 (m, 1H). <sup>13</sup>C NMR (150 MHz, CDCl<sub>3</sub>) δ 174.98, 167.15, 161.60, 146.70, 129.42, 129.13, 80.69, 51.91, 51.88, 43.81, 37.20, 33.08, 26.24, 24.90, 24.51, 24.11, 23.95. HRMS (ESI-TOF) Calcd for C<sub>20</sub>H<sub>28</sub>NO<sub>5</sub><sup>+</sup> [M+H]<sup>+</sup>: 362.1962, found: 362.1960.

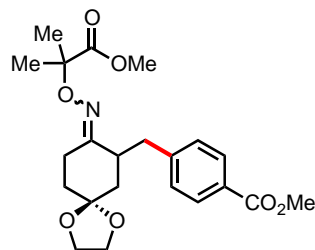

### Methyl

#### 4-((8-(((1-methoxy-2-methyl-1-oxopropan-2-yl)oxy)imino)-1,4-dioxaspiro[4.5]decan-7-yl)methyl)benzoate (**2z**)

Substrate **1z** was arylated following the general arylation procedure at 80 °C except the use of PhCF<sub>3</sub> as solvent and AgOAc (2.0 equiv) instead of HFIP and AgTFA (2.0 equiv) respectively. After purification by preparative thin-layer chromatography (Hexane : EtOAc = 3:1 as eluent), **2z** E/Z (4.5:1) was obtained as a colorless oil (27.2 mg, 65%). <sup>1</sup>H NMR (600 MHz, CDCl<sub>3</sub>) of E isomer (major) δ 7.93-7.92 (m, 2H), 7.23-7.21 (m, 2H), 3.95-3.85 (m, 4H), 3.90 (s, 3H), 3.68 (s, 3H), 3.20-3.16 (m, 2H), 2.85-2.79 (m, 1H), 2.56 (dd, *J*<sub>1</sub> = 8.4 Hz, *J*<sub>2</sub> = 14.4 Hz, 1H), 2.16 (ddd, *J*<sub>1</sub> = 5.4 Hz, *J*<sub>2</sub> = 12.6 Hz, *J*<sub>3</sub> = 14.4 Hz, 1H), 1.85-1.76 (m, 2H), 1.74-1.67 (m, 1H), 1.52-1.48 (m, 1H), 1.47 (s, 3H), 1.45 (s, 3H). <sup>13</sup>C NMR (150 MHz, CDCl<sub>3</sub>) of E isomer (major) δ 174.82, 167.19, 159.61, 146.21, 129.51, 129.48, 129.18, 108.00, 81.00, 64.52, 64.35, 51.95, 40.88, 40.53, 36.84, 33.81, 24.10, 24.00, 21.69. HRMS (ESI-TOF) Calcd for C<sub>22</sub>H<sub>30</sub>NO<sub>7</sub><sup>+</sup> [M+H]<sup>+</sup>: 420.2017, found: 420.2021.

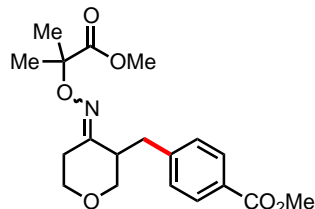

### Methyl

#### 4-((4-(((1-methoxy-2-methyl-1-oxopropan-2-yl)oxy)imino)tetrahydro-2H-pyran-3-yl)methyl)benzoate (**2aa**)

Substrate **1aa** was arylated following the general arylation procedure at 80 °C except the use of PhCF<sub>3</sub> as solvent instead of HFIP. After purification by preparative thin-layer chromatography (Hexane : EtOAc = 3:1 as eluent), **2aa** E/Z (15:1) was obtained as a colorless oil (27.2 mg, 75%). <sup>1</sup>H NMR (600 MHz, CDCl<sub>3</sub>) of E isomer (major) δ 7.95-7.93 (m, 2H), 7.24-7.23 (m, 2H), 3.90 (s, 3H), 3.80-3.71 (m, 3H), 3.69 (s, 3H), 3.50-3.47 (m, 1H), 3.09-3.05 (m, 1H), 2.82 (ddd, *J*<sub>1</sub> = 4.8 Hz, *J*<sub>2</sub> = 6.0 Hz, *J*<sub>3</sub> = 14.4 Hz, 1H), 2.73-2.67 (m, 2H), 2.82 (ddd, *J*<sub>1</sub> = 5.4 Hz, *J*<sub>2</sub> = 7.2 Hz, *J*<sub>3</sub> = 14.4 Hz, 1H), 1.44 (s, 3H), 1.43 (s, 3H). <sup>13</sup>C NMR (150 MHz, CDCl<sub>3</sub>) of E isomer (major) δ 174.69, 167.04, 157.09, 145.07, 129.65, 129.09, 128.12, 80.99, 71.87, 67.38, 51.99, 43.17, 34.71, 25.40, 24.10, 23.94. HRMS (ESI-TOF) Calcd for C<sub>19</sub>H<sub>26</sub>NO<sub>6</sub><sup>+</sup> [M+H]<sup>+</sup>: 364.1755, found: 364.1750.

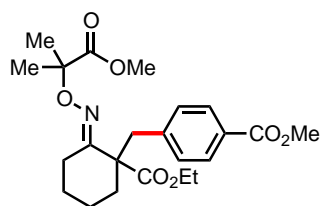

### (E)-Methyl

#### 4-(((1-(ethoxycarbonyl)-2-(((1-methoxy-2-methyl-1-oxopropan-2-yl)oxy)imino)cyclohexyl)methyl)benzoate (**2ab**)

Substrate **1ab** was arylated following the general arylation procedure at 80 °C. After purification by preparative thin-layer chromatography (Hexane : EtOAc = 5:1 as eluent), **2ab** was obtained as a colorless oil (38.1 mg, 88%). <sup>1</sup>H NMR (600 MHz, CDCl<sub>3</sub>) δ 7.90-7.88 (m, 2H), 7.20-7.18 (m, 2H), 4.03 (q, *J* = 7.2 Hz, 2H), 3.89 (s, 3H), 3.74 (s, 1.6H), 3.39 (d, *J* = 13.8 Hz, 1H), 3.31-3.27 (m, 1H), 2.92 (d, *J* = 13.8 Hz, 1H), 2.29-2.26 (m, 1H), 1.79-1.73 (m, 2H), 1.68-1.64 (m, 1H), 1.54 (s, 3H), 1.53 (s, 3H), 1.52-1.46 (m, 1H), 1.43-1.35 (m, 2H), 1.14 (t, *J* = 7.2 Hz, 3H). <sup>13</sup>C NMR (150 MHz, CDCl<sub>3</sub>) δ 174.83, 172.44, 167.08, 159.87, 143.07, 130.52, 129.02, 128.26, 81.26, 60.89, 55.03, 51.99, 51.94, 41.08, 35.78, 25.56, 24.34, 24.18, 24.01, 22.69, 13.98. HRMS (ESI-TOF) Calcd for C<sub>23</sub>H<sub>32</sub>NO<sub>7</sub><sup>+</sup> [M+H]<sup>+</sup>: 434.2173, found: 434.2169.

### The Scope of Aryl Iodides

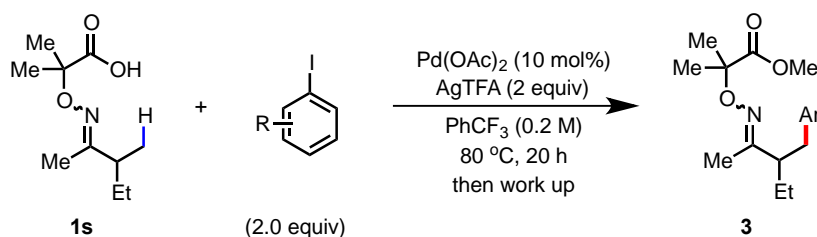

**General Procedure for  $\beta$ -C(sp<sup>3</sup>)-H Arylation of **1s**:** Substrate **1s** (0.10 mmol, 20.1 mg), ArI (0.20 mmol), Pd(OAc)<sub>2</sub> (0.01 mmol, 2.3 mg), and AgTFA (0.20 mmol, 44.2 mg) were weighed into a reaction vial (10 mL) with a magnetic stir bar under air. PhCF<sub>3</sub> (0.5 mL) was added, and the vial was sealed with a cap. The reaction mixture was stirred at 80 °C for 20 hours. Upon completion, the reaction mixture was cooled to room temperature and diluted with EtOAc. Then the reaction mixture was filtered through a short celite plug and transferred to a reaction vial (10 mL) with a magnetic stir bar. The solvent was evaporated under vacuum. Anhydrous MeOH (1.0 mL) was added to the mixture. SOCl<sub>2</sub> (0.30 mmol, 22  $\mu$ L) was added dropwise at room temperature. The reaction mixture was stirred at room temperature for 30 min. Upon completion, the solvent was removed under vacuum and the resulting mixture was purified by preparative thin-layer chromatography.

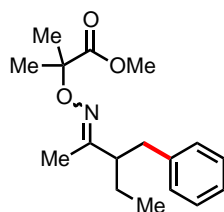

### Methyl 2-(((3-benzylpentan-2-ylidene)amino)oxy)-2-methylpropanoate (**3a**)

Substrate **1s** was arylated following the general arylation procedure. After purification by preparative thin-layer chromatography (Hexane : EtOAc = 10:1 as eluent), **3a** E/Z (9.1:1) was obtained as a colorless oil (25.9 mg, 89%). <sup>1</sup>H NMR (600 MHz, CDCl<sub>3</sub>) of E isomer (major) δ 7.25-7.23 (m, 2H), 7.16-7.14 (m, 1H), 7.12-7.11 (m, 2H), 3.64 (s, 3H), 2.76-2.73 (m, 1H), 2.69-2.65 (m, 1H), 2.51-2.46 (m, 1H), 1.76 (s, 3H), 1.49-1.45 (m, 2H), 1.43 (s, 3H), 1.37 (s, 3H), 0.81 (t, *J* = 7.2 Hz, 3H). <sup>13</sup>C NMR (150 MHz, CDCl<sub>3</sub>) of E isomer (major) δ 175.10, 159.07, 140.09, 128.92, 128.12, 125.83, 80.64, 51.83, 48.26, 38.63, 24.70, 24.13, 23.91, 11.60, 11.38. HRMS (ESI-TOF) Calcd for C<sub>17</sub>H<sub>26</sub>NO<sub>3</sub><sup>+</sup> [M+H]<sup>+</sup>: 292.1907, found: 292.1913.

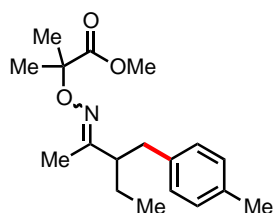

### Methyl 2-methyl-2-(((3-(4-methylbenzyl)pentan-2-ylidene)amino)oxy)propanoate (**3b**)

Substrate **1s** was arylated following the general arylation procedure. After purification by preparative thin-layer chromatography (Hexane : EtOAc = 10:1 as eluent), **3b** E/Z (9.1:1) was obtained as a colorless oil (28.1 mg, 92%). <sup>1</sup>H NMR (600 MHz, CDCl<sub>3</sub>) of E isomer (major) δ 7.06-7.04 (m, 2H), 7.01-7.00 (m, 2H), 3.64 (s, 3H), 2.72-2.69 (m, 1H), 2.64-2.60 (m, 1H), 2.48-2.43 (m, 1H), 2.29 (s, 3H), 1.74 (s, 3H), 1.48-1.42 (m, 2H), 1.43 (s, 3H), 1.39 (s, 3H), 0.80 (t, *J* = 7.2 Hz, 3H). <sup>13</sup>C NMR (150 MHz, CDCl<sub>3</sub>) of E isomer (major) δ 175.14, 159.24, 136.97, 135.21, 128.80, 80.62, 51.81, 48.32, 38.21, 24.59, 24.13, 23.92, 20.93, 11.60, 11.39. HRMS (ESI-TOF) Calcd for C<sub>18</sub>H<sub>28</sub>NO<sub>3</sub><sup>+</sup> [M+H]<sup>+</sup>: 306.2064, found: 306.2068.

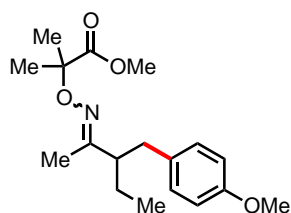

### Methyl 2-(((3-(4-methoxybenzyl)pentan-2-ylidene)amino)oxy)-2-methylpropanoate (**3c**)

Substrate **1s** was arylated following the general arylation procedure. After purification by preparative thin-layer chromatography (Hexane : EtOAc = 5:1 as eluent), **3c** E/Z (9.1:1) was obtained as a colorless oil (28.6 mg, 89%). <sup>1</sup>H NMR (600 MHz, CDCl<sub>3</sub>) of E isomer (major) δ 7.04-7.03 (m, 2H), 6.80-6.78 (m, 2H), 3.77 (s, 3H), 3.65 (s, 3H), 2.70-2.66 (m, 1H), 2.63-2.59 (m, 1H), 2.45-2.40 (m, 1H), 1.75 (s, 3H), 1.48-1.38 (m, 2H), 1.43 (s, 3H), 1.39 (s, 3H), 0.80 (t, *J* = 7.2 Hz, 3H). <sup>13</sup>C NMR (150 MHz, CDCl<sub>3</sub>) of E isomer (major) δ 175.13, 159.23, 157.78, 132.17, 129.81, 113.56, 80.63, 55.19, 51.84, 48.47, 37.77, 24.61, 24.14, 23.95, 11.60, 11.41. HRMS (ESI-TOF) Calcd for C<sub>18</sub>H<sub>28</sub>NO<sub>4</sub><sup>+</sup> [M+H]<sup>+</sup>: 322.2013, found: 322.2008.

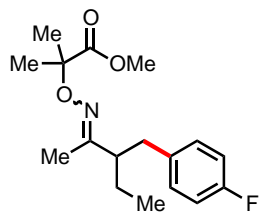

**Methyl 2-(((3-(4-fluorobenzyl)pentan-2-ylidene)amino)oxy)-2-methylpropanoate (3d)**

Substrate **1s** was arylated following the general arylation procedure. After purification by preparative thin-layer chromatography (Hexane : EtOAc = 10:1 as eluent), **3d** E/Z (9.1:1) was obtained as a colorless oil (25.6 mg, 83%). <sup>1</sup>H NMR (600 MHz, CDCl<sub>3</sub>) of E isomer (major) δ 7.08-7.06 (m, 2H), 6.95-6.91 (m, 2H), 3.64 (s, 3H), 2.73-2.64 (m, 2H), 2.46-2.42 (m, 1H), 1.74 (s, 3H), 1.49-1.38 (m, 2H), 1.42 (s, 3H), 1.38 (s, 3H), 0.82 (t, *J* = 7.2 Hz, 3H). <sup>13</sup>C NMR (150 MHz, CDCl<sub>3</sub>) of E isomer (major) δ 175.05, 161.27 (d, *J* = 242.7 Hz), 158.79, 135.72 (d, *J* = 3.2 Hz), 130.23 (d, *J* = 7.6 Hz), 114.85 (d, *J* = 21.0 Hz), 80.66, 51.84, 48.40, 37.72, 24.77, 24.12, 23.91, 11.59, 11.35. HRMS (ESI-TOF) Calcd for C<sub>17</sub>H<sub>25</sub>FNO<sub>3</sub><sup>+</sup> [M+H]<sup>+</sup>: 310.1813, found: 310.1810.

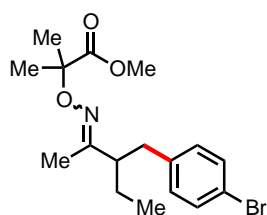

**Methyl 2-(((3-(4-bromobenzyl)pentan-2-ylidene)amino)oxy)-2-methylpropanoate (3e)**

Substrate **1s** was arylated following the general arylation procedure. After purification by preparative thin-layer chromatography (Hexane : EtOAc = 10:1 as eluent), **3e** E/Z (9.1:1) was obtained as a colorless oil (33.3 mg, 90%). <sup>1</sup>H NMR (600 MHz, CDCl<sub>3</sub>) of E isomer (major) δ 7.37-7.35 (m, 2H), 7.00-6.98 (m, 2H), 3.64 (s, 3H), 2.71-2.62 (m, 2H), 2.47-2.42 (m, 1H), 1.74 (s, 3H), 1.49-1.38 (m, 2H), 1.42 (s, 3H), 1.38 (s, 3H), 0.82 (t, *J* = 7.2 Hz, 3H). <sup>13</sup>C NMR (150 MHz, CDCl<sub>3</sub>) of E isomer (major) δ 175.01, 158.61, 139.10, 131.17, 130.66, 119.62, 80.68, 51.87, 48.16, 37.88, 24.81, 24.11, 23.92, 11.65, 11.31. HRMS (ESI-TOF) Calcd for C<sub>17</sub>H<sub>25</sub>BrNO<sub>3</sub><sup>+</sup> [M+H]<sup>+</sup>: 370.1012, found: 370.1018.

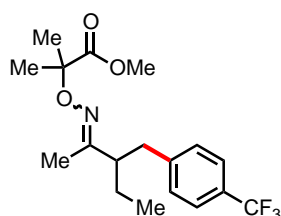

**Methyl**

**2-methyl-2-(((3-(4-(trifluoromethyl)benzyl)pentan-2-ylidene)amino)oxy)propanoate (3f)**

Substrate **1s** was arylated following the general arylation procedure. After purification by preparative thin-layer chromatography (Hexane : EtOAc = 5:1 as eluent), **3f** E/Z (9.1:1) was obtained as a colorless oil (32.3 mg, 90%). <sup>1</sup>H NMR (600 MHz, CDCl<sub>3</sub>) of E isomer (major) δ

7.51-7.49 (m, 2H), 7.24-7.22 (m, 2H), 3.62 (s, 3H), 2.82-2.73 (m, 2H), 2.53-2.48 (m, 1H), 1.76 (s, 3H), 1.50 (quintet,  $J = 7.2$  Hz, 2H), 1.41 (s, 3H), 1.35 (s, 3H), 0.84 (t,  $J = 7.2$  Hz, 3H).  $^{13}\text{C}$  NMR (150 MHz,  $\text{CDCl}_3$ ) of E isomer (major)  $\delta$  174.97, 158.36, 144.34, 129.20, 128.23 (q,  $J = 31.6$  Hz), 125.05 (q,  $J = 3.4$  Hz), 124.31 (q,  $J = 270.2$  Hz), 80.72, 51.81, 48.10, 38.22, 24.94, 24.08, 23.84, 11.65, 11.26. HRMS (ESI-TOF) Calcd for  $\text{C}_{18}\text{H}_{25}\text{F}_3\text{NO}_3^+$   $[\text{M}+\text{H}]^+$ : 360.1781, found: 360.1787.

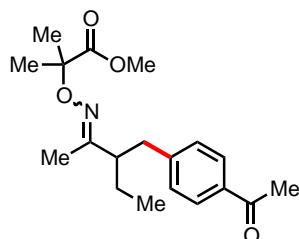

### Methyl 2-(((3-(4-acetylbenzyl)pentan-2-ylidene)amino)oxy)-2-methylpropanoate (**3g**)

Substrate **1s** was arylated following the general arylation procedure. After purification by preparative thin-layer chromatography (Hexane : EtOAc = 5:1 as eluent), **3g** E/Z (9.1:1) was obtained as a colorless oil (25.0 mg, 75%).  $^1\text{H}$  NMR (600 MHz,  $\text{CDCl}_3$ ) of E isomer (major)  $\delta$  7.86-7.85 (m, 2H), 7.23-7.21 (m, 2H), 3.64 (s, 3H), 2.83-2.80 (m, 1H), 2.76-2.73 (m, 1H), 2.57 (s, 3H), 2.54-2.49 (m, 1H), 1.76 (s, 3H), 1.49 (quintet,  $J = 7.2$  Hz, 2H), 1.42 (s, 3H), 1.37 (s, 3H), 0.83 (t,  $J = 7.2$  Hz, 3H).  $^{13}\text{C}$  NMR (150 MHz,  $\text{CDCl}_3$ ) of E isomer (major)  $\delta$  197.82, 174.97, 158.53, 146.07, 135.09, 129.14, 128.32, 80.71, 51.85, 48.01, 38.44, 26.52, 24.90, 24.12, 23.90, 11.79, 11.26. HRMS (ESI-TOF) Calcd for  $\text{C}_{19}\text{H}_{28}\text{NO}_4^+$   $[\text{M}+\text{H}]^+$ : 334.2013, found: 334.2010.

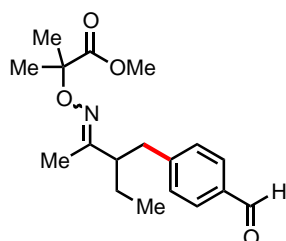

### Methyl 2-(((3-(4-formylbenzyl)pentan-2-ylidene)amino)oxy)-2-methylpropanoate (**3h**)

Substrate **1s** was arylated following the general arylation procedure. After purification by preparative thin-layer chromatography (Hexane : EtOAc = 5:1 as eluent), **3h** E/Z (9.1:1) was obtained as a colorless oil (26.2 mg, 82%).  $^1\text{H}$  NMR (600 MHz,  $\text{CDCl}_3$ ) of E isomer (major)  $\delta$  9.96 (s, 1H), 7.78-7.76 (m, 2H), 7.30-7.29 (m, 2H), 3.63 (s, 3H), 2.86-2.82 (m, 1H), 2.79-2.76 (m, 1H), 2.56-2.51 (m, 1H), 1.76 (s, 3H), 1.50 (quintet,  $J = 7.2$  Hz, 2H), 1.41 (s, 3H), 1.36 (s, 3H), 0.84 (t,  $J = 7.2$  Hz, 3H).  $^{13}\text{C}$  NMR (150 MHz,  $\text{CDCl}_3$ ) of E isomer (major)  $\delta$  191.94, 174.93, 158.36, 147.75, 134.54, 129.72, 129.61, 80.73, 51.86, 47.99, 38.60, 24.98, 24.11, 23.89, 11.79, 11.25. HRMS (ESI-TOF) Calcd for  $\text{C}_{18}\text{H}_{26}\text{NO}_4^+$   $[\text{M}+\text{H}]^+$ : 320.1856, found: 320.1851.



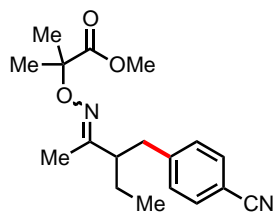

**Methyl 2-(((3-(4-cyanobenzyl)pentan-2-ylidene)amino)oxy)-2-methylpropanoate (3i)**

Substrate **1s** was arylated following the general arylation procedure except the use of HFIP (1.0 mL) as solvent instead of PhCF<sub>3</sub> (0.5 mL). After purification by preparative thin-layer chromatography (Hexane : EtOAc = 5:1 as eluent), **3i** E/Z (9.1:1) was obtained as a colorless oil (29.7 mg, 94%). <sup>1</sup>H NMR (600 MHz, CDCl<sub>3</sub>) of E isomer (major) δ 7.55-7.53 (m, 2H), 7.24-7.23 (m, 2H), 3.64 (s, 3H), 2.83-2.79 (m, 1H), 2.77-2.73 (m, 1H), 2.52-2.47 (m, 1H), 1.75 (s, 3H), 1.53-1.47 (m, 2H), 1.41 (s, 3H), 1.36 (s, 3H), 0.84 (t, *J* = 7.2 Hz, 3H). <sup>13</sup>C NMR (150 MHz, CDCl<sub>3</sub>) of E isomer (major) δ 174.83, 158.07, 145.94, 131.93, 129.69, 118.99, 109.73, 80.72, 51.83, 47.89, 38.37, 24.98, 24.07, 23.86, 11.76, 11.17. HRMS (ESI-TOF) Calcd for C<sub>18</sub>H<sub>25</sub>N<sub>2</sub>O<sub>3</sub><sup>+</sup> [M+H]<sup>+</sup>: 317.1860, found: 317.1868.

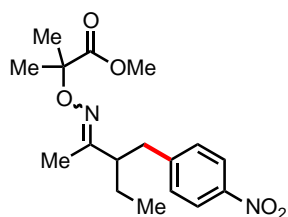

**Methyl 2-methyl-2-(((3-(4-nitrobenzyl)pentan-2-ylidene)amino)oxy)propanoate (3j-mono)**

Substrate **1s** was arylated following the general arylation procedure except the use of HFIP (1.0 mL) as solvent instead of PhCF<sub>3</sub> (0.5 mL). After purification by preparative thin-layer chromatography (Hexane : EtOAc = 5:1 as eluent), **3j-mono** E/Z (9.1:1) was obtained as a colorless oil (26.9 mg, 80%). <sup>1</sup>H NMR (600 MHz, CDCl<sub>3</sub>) of E isomer (major) δ 8.13-7.10 (m, 2H), 7.30-7.28 (m, 2H), 3.64 (s, 3H), 2.89-2.85 (m, 1H), 2.82-2.78 (m, 1H), 2.55-2.50 (m, 1H), 1.76 (s, 3H), 1.54-1.50 (m, 2H), 1.41 (s, 3H), 1.37 (s, 3H), 0.85 (t, *J* = 7.2 Hz, 3H). <sup>13</sup>C NMR (150 MHz, CDCl<sub>3</sub>) of E isomer (major) δ 174.82, 158.01, 148.20, 146.36, 129.72, 123.39, 80.76, 51.84, 47.94, 38.10, 25.07, 24.09, 23.90, 11.88, 11.16. HRMS (ESI-TOF) Calcd for C<sub>17</sub>H<sub>25</sub>N<sub>2</sub>O<sub>5</sub><sup>+</sup> [M+H]<sup>+</sup>: 337.1758, found: 337.1752.

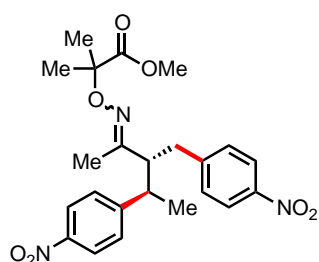

**Methyl 2-methyl-2-(((3R,4R)-3-(4-nitrobenzyl)-4-(4-nitrophenyl)pentan-2-ylidene)amino)oxy)propanoate**

### ropanoate (**1j-di**)

Substrate **1s** was arylated following the general arylation procedure except the use of HFIP (1.0 mL) as solvent instead of PhCF<sub>3</sub> (0.5 mL). After purification by preparative thin-layer chromatography (Hexane : EtOAc = 5:1 as eluent), **1j-di** E/Z (10:1) was obtained as a colorless oil (6.4 mg, 14%). <sup>1</sup>H NMR (600 MHz, CDCl<sub>3</sub>) of E isomer (major) δ 8.16-8.15 (m, 2H), 8.12-8.10 (m, 2H), 7.36-7.34 (m, 2H), 7.26-7.25 (m, 2H), 3.59 (s, 3H), 3.16-3.11 (m, 1H), 3.06 (d, *J*<sub>1</sub> = 3.6 Hz, *J*<sub>2</sub> = 13.8 Hz, 1H), 2.90 (d, *J*<sub>1</sub> = 11.4 Hz, *J*<sub>2</sub> = 13.8 Hz, 1H), 2.84-2.80 (m, 1H), 1.49 (s, 3H), 1.42 (d, *J* = 6.6 Hz, 3H), 1.24 (s, 6H). <sup>13</sup>C NMR (150 MHz, CDCl<sub>3</sub>) of E isomer (major) δ 174.46, 156.17, 152.48, 147.49, 146.60, 146.49, 129.76, 128.47, 123.65, 123.49, 80.84, 53.54, 51.91, 42.54, 35.65, 24.03, 18.92, 13.86. HRMS (ESI-TOF) Calcd for C<sub>23</sub>H<sub>28</sub>N<sub>3</sub>O<sub>7</sub><sup>+</sup> [M+H]<sup>+</sup>: 458.1922, found: 458.1921.

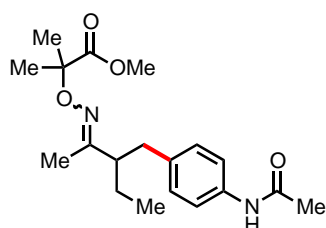

### Methyl 2-(((3-(4-acetamidobenzyl)pentan-2-ylidene)amino)oxy)-2-methylpropanoate (**3k**)

Substrate **1s** was arylated following the general arylation procedure. After purification by preparative thin-layer chromatography (Hexane : EtOAc = 1:1 as eluent), **3k** E/Z (9.1:1) was obtained as a colorless oil (24.4 mg, 70%). <sup>1</sup>H NMR (600 MHz, CDCl<sub>3</sub>) of E isomer (major) δ 7.48 (br s, 1H), 7.39-7.37 (m, 2H), 7.07-7.05 (m, 2H), 3.66 (s, 3H), 2.72-2.68 (m, 1H), 2.64-2.60 (m, 1H), 2.46-2.42 (m, 1H), 2.14 (s, 3H), 1.76 (s, 3H), 1.48-1.43 (m, 2H), 1.43 (s, 3H), 1.39 (s, 3H), 0.80 (t, *J* = 7.2 Hz, 3H). <sup>13</sup>C NMR (150 MHz, CDCl<sub>3</sub>) of E isomer (major) δ 175.21, 168.35, 159.17, 136.09, 135.85, 129.35, 119.77, 80.63, 51.88, 48.23, 37.96, 24.61, 24.44, 24.14, 23.94, 11.67, 11.33. HRMS (ESI-TOF) Calcd for C<sub>19</sub>H<sub>29</sub>N<sub>2</sub>O<sub>4</sub><sup>+</sup> [M+H]<sup>+</sup>: 349.2122, found: 349.2127.

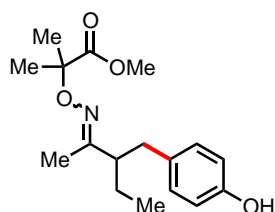

### Methyl 2-(((3-(4-hydroxybenzyl)pentan-2-ylidene)amino)oxy)-2-methylpropanoate (**3l**)

Substrate **1s** was arylated following the general arylation procedure. After purification by preparative thin-layer chromatography (Hexane : EtOAc = 5:1 as eluent), **3l** E/Z (9.1:1) was obtained as a colorless oil (27.0 mg, 88%). <sup>1</sup>H NMR (600 MHz, CDCl<sub>3</sub>) of E isomer (major) δ 6.98-6.95 (m, 2H), 6.72-6.70 (m, 2H), 5.26 (s, 1H), 3.66 (s, 3H), 2.68-2.64 (m, 1H), 2.61-2.58 (m, 1H), 2.44-2.40 (m, 1H), 1.75 (s, 3H), 1.48-1.39 (m, 2H), 1.44 (s, 3H), 1.39 (s, 3H), 0.80 (t, *J* = 7.2 Hz, 3H). <sup>13</sup>C NMR (150 MHz, CDCl<sub>3</sub>) of E isomer (major) δ 175.41, 159.55, 153.87, 132.02, 129.96, 115.01, 80.65, 51.98, 48.48, 37.76, 24.63, 24.15, 23.95, 11.55, 11.43. HRMS

(ESI-TOF) Calcd for  $C_{17}H_{26}NO_4^+$   $[M+H]^+$ : 308.1856, found: 308.1862.

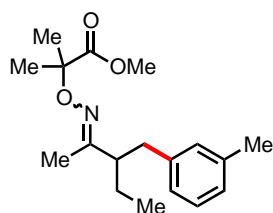

**Methyl 2-methyl-2-(((3-(3-methylbenzyl)pentan-2-ylidene)amino)oxy)propanoate (3m)**

Substrate **1s** was arylated following the general arylation procedure. After purification by preparative thin-layer chromatography (Hexane : EtOAc = 10:1 as eluent), **3m** E/Z (9.1:1) was obtained as a colorless oil (26.2 mg, 86%).  $^1H$  NMR (600 MHz,  $CDCl_3$ ) of E isomer (major)  $\delta$  7.13 (t,  $J = 7.2$  Hz, 1H), 6.97 (d,  $J = 7.8$  Hz, 1H), 6.94 (s, 1H), 7.13 (d,  $J = 8.4$  Hz, 1H), 3.65 (s, 3H), 2.73-2.69 (m, 1H), 2.64-2.60 (m, 1H), 2.50-2.45 (m, 1H), 2.30 (s, 3H), 1.76 (s, 3H), 1.47-1.42 (m, 2H), 1.43 (s, 3H), 1.39 (s, 3H), 0.80 (t,  $J = 7.2$  Hz, 3H).  $^{13}C$  NMR (150 MHz,  $CDCl_3$ ) of E isomer (major)  $\delta$  175.13, 159.24, 140.01, 137.62, 129.73, 128.00, 126.58, 125.97, 80.64, 51.83, 48.20, 38.56, 24.63, 24.16, 23.92, 21.34, 11.58, 11.40. HRMS (ESI-TOF) Calcd for  $C_{18}H_{28}NO_3^+$   $[M+H]^+$ : 306.2064, found: 306.2068.

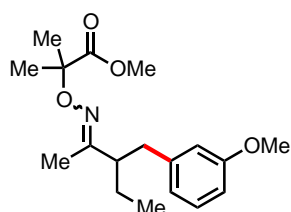

**Methyl 2-(((3-(3-methoxybenzyl)pentan-2-ylidene)amino)oxy)-2-methylpropanoate (3n)**

Substrate **1s** was arylated following the general arylation procedure. After purification by preparative thin-layer chromatography (Hexane : EtOAc = 10:1 as eluent), **3n** E/Z (9.1:1) was obtained as a colorless oil (26.6 mg, 83%).  $^1H$  NMR (600 MHz,  $CDCl_3$ ) of E isomer (major)  $\delta$  7.16 (t,  $J = 7.8$  Hz, 1H), 6.72-6.70 (m, 2H), 6.68-6.66 (m, 1H), 3.78 (s, 3H), 3.65 (s, 3H), 2.74-2.71 (m, 1H), 2.66-2.62 (m, 1H), 2.50-2.45 (m, 1H), 1.76 (s, 3H), 1.49-1.42 (m, 2H), 1.43 (s, 3H), 1.39 (s, 3H), 0.81 (t,  $J = 7.2$  Hz, 3H).  $^{13}C$  NMR (150 MHz,  $CDCl_3$ ) of E isomer (major)  $\delta$  175.10, 159.46, 159.11, 141.71, 129.06, 121.39, 114.62, 111.24, 80.65, 55.07, 51.82, 48.14, 38.70, 24.66, 24.15, 23.92, 11.67, 11.36. HRMS (ESI-TOF) Calcd for  $C_{18}H_{28}NO_4^+$   $[M+H]^+$ : 322.2013, found: 322.2019.

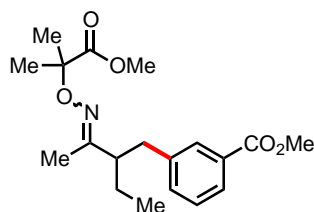

**Methyl 3-(2-ethyl-3-(((1-methoxy-2-methyl-1-oxopropan-2-yl)oxy)imino)butyl)benzoate (3o)**

Substrate **1s** was arylated following the general arylation procedure. After purification by preparative thin-layer chromatography (Hexane : EtOAc = 5:1 as eluent), **3o** E/Z (9.1:1) was obtained as a colorless oil (30.7 mg, 88%). <sup>1</sup>H NMR (600 MHz, CDCl<sub>3</sub>) of E isomer (major) δ 7.86-7.84 (m, 1H), 7.81 (s, 1H), 7.33-7.32 (m, 2H), 3.91 (s, 3H), 3.64 (s, 3H), 2.82-2.78 (m, 1H), 2.75-2.71 (m, 1H), 2.54-2.49 (m, 1H), 1.76 (s, 3H), 1.48 (quintet, *J* = 7.2 Hz, 2H), 1.42 (s, 3H), 1.36 (s, 3H), 0.82 (t, *J* = 7.2 Hz, 3H). <sup>13</sup>C NMR (150 MHz, CDCl<sub>3</sub>) of E isomer (major) δ 174.99, 167.16, 158.65, 140.46, 133.59, 130.00, 129.97, 128.19, 127.21, 80.66, 51.99, 51.81, 48.11, 38.26, 24.73, 24.11, 23.86, 11.71, 11.28. HRMS (ESI-TOF) Calcd for C<sub>19</sub>H<sub>28</sub>NO<sub>5</sub><sup>+</sup> [M+H]<sup>+</sup>: 350.1962, found: 350.1969.

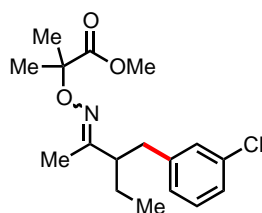

### Methyl 2-(((3-(3-chlorobenzyl)pentan-2-ylidene)amino)oxy)-2-methylpropanoate (**3p**)

Substrate **1s** was arylated following the general arylation procedure. After purification by preparative thin-layer chromatography (Hexane : EtOAc = 10:1 as eluent), **3p** E/Z (9.1:1) was obtained as a colorless oil (30.3 mg, 93%). <sup>1</sup>H NMR (600 MHz, CDCl<sub>3</sub>) of E isomer (major) δ 7.18-7.11 (m, 3H), 7.01-7.00 (m, 1H), 3.65 (s, 3H), 2.74-2.70 (m, 1H), 2.67-2.64 (m, 1H), 2.50-2.45 (m, 1H), 1.76 (s, 3H), 1.49-1.45 (m, 2H), 1.43 (s, 3H), 1.39 (s, 3H), 0.82 (t, *J* = 7.2 Hz, 3H). <sup>13</sup>C NMR (150 MHz, CDCl<sub>3</sub>) of E isomer (major) δ 175.00, 158.55, 142.19, 133.88, 129.36, 128.96, 127.13, 126.05, 80.70, 51.84, 48.01, 38.09, 24.80, 24.13, 23.89, 11.67, 11.27. HRMS (ESI-TOF) Calcd for C<sub>17</sub>H<sub>25</sub>ClNO<sub>3</sub><sup>+</sup> [M+H]<sup>+</sup>: 326.1517, found: 326.1522.

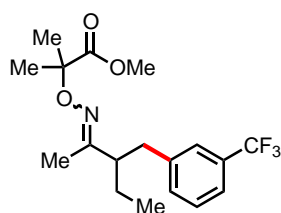

### Methyl

### 2-methyl-2-(((3-(3-(trifluoromethyl)benzyl)pentan-2-ylidene)amino)oxy)propanoate (**3q**)

Substrate **1s** was arylated following the general arylation procedure. After purification by preparative thin-layer chromatography (Hexane : EtOAc = 10:1 as eluent), **3q** E/Z (9.1:1) was obtained as a colorless oil (32.3 mg, 90%). <sup>1</sup>H NMR (600 MHz, CDCl<sub>3</sub>) of E isomer (major) δ 7.43-7.42 (m, 1H), 7.38-7.35 (m, 2H), 7.32-7.30 (m, 1H), 3.64 (s, 3H), 2.83-2.79 (m, 1H), 2.76-2.73 (m, 1H), 2.53-2.48 (m, 1H), 1.76 (s, 3H), 1.49 (quintet, *J* = 7.2 Hz, 2H), 1.41 (s, 3H), 1.35 (s, 3H), 0.84 (t, *J* = 7.2 Hz, 3H). <sup>13</sup>C NMR (150 MHz, CDCl<sub>3</sub>) of E isomer (major) δ 174.97, 158.42, 141.08, 132.33, 130.46 (q, *J* = 31.8 Hz), 128.57, 125.51 (q, *J* = 4.2 Hz), 124.21 (q, *J* = 270.4 Hz), 122.79 (q, *J* = 4.2 Hz), 80.72, 51.81, 48.07, 38.23, 24.89, 24.13, 23.81, 11.72, 11.25. HRMS (ESI-TOF) Calcd for C<sub>18</sub>H<sub>25</sub>F<sub>3</sub>NO<sub>3</sub><sup>+</sup> [M+H]<sup>+</sup>: 360.1781, found: 360.1789.

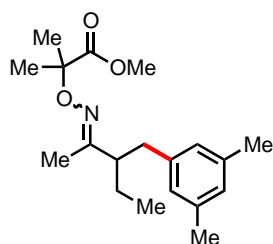

**Methyl 2-(((3-(3,5-dimethylbenzyl)pentan-2-ylidene)amino)oxy)-2-methylpropanoate (3r)**

Substrate **1s** was arylated following the general arylation procedure. After purification by preparative thin-layer chromatography (Hexane : EtOAc = 10:1 as eluent), **3r** E/Z (9.1:1) was obtained as a colorless oil (29.7 mg, 93%). <sup>1</sup>H NMR (600 MHz, CDCl<sub>3</sub>) of E isomer (major) δ 6.80 (s, 1H), 6.74 (s, 2H), 3.66 (s, 3H), 2.69-2.66 (m, 1H), 2.59-2.55 (m, 1H), 2.49-2.44 (m, 1H), 2.26 (s, 6H), 1.76 (s, 3H), 1.49-1.44 (m, 2H), 1.44 (s, 3H), 1.40 (s, 3H), 0.80 (t, *J* = 7.2 Hz, 3H). <sup>13</sup>C NMR (150 MHz, CDCl<sub>3</sub>) of E isomer (major) δ 175.12, 159.38, 139.94, 137.48, 127.47, 126.79, 80.61, 51.79, 48.11, 38.47, 24.54, 24.16, 23.91, 21.20, 11.52, 11.40. HRMS (ESI-TOF) Calcd for C<sub>19</sub>H<sub>30</sub>NO<sub>3</sub><sup>+</sup> [M+H]<sup>+</sup>: 320.2220, found: 320.2215.

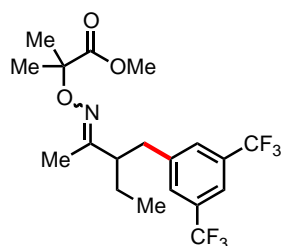

**Methyl 2-(((3-(3,5-bis(trifluoromethyl)benzyl)pentan-2-ylidene)amino)oxy)-2-methylpropanoate (3s)**

Substrate **1s** was arylated following the general arylation procedure. After purification by preparative thin-layer chromatography (Hexane : EtOAc = 10:1 as eluent), **3s** E/Z (6.5:1) was obtained as a colorless oil (30.7 mg, 72%). <sup>1</sup>H NMR (600 MHz, CDCl<sub>3</sub>) of E isomer (major) δ 7.69 (s, 1H), 7.58 (s, 2H), 3.65 (s, 3H), 2.92-2.88 (m, 1H), 2.84-2.81 (m, 1H), 2.57-2.52 (m, 1H), 1.77 (s, 3H), 1.57-1.50 (m, 2H), 1.40 (s, 3H), 1.35 (s, 3H), 0.86 (t, *J* = 7.2 Hz, 3H). <sup>13</sup>C NMR (150 MHz, CDCl<sub>3</sub>) of E isomer (major) δ 174.82, 157.81, 142.74, 131.41 (q, *J* = 32.8 Hz), 129.00, 123.37 (q, *J* = 268.6 Hz), 120.09 (q, *J* = 3.2 Hz), 80.83, 51.83, 47.83, 37.91, 25.07, 24.13, 23.77, 11.98, 11.11. HRMS (ESI-TOF) Calcd for C<sub>19</sub>H<sub>24</sub>F<sub>6</sub>NO<sub>3</sub><sup>+</sup> [M+H]<sup>+</sup>: 428.1655, found: 428.1650.

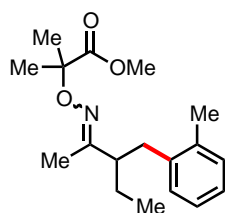

**Methyl 2-methyl-2-(((3-(2-methylbenzyl)pentan-2-ylidene)amino)oxy)propanoate (3t)**

Substrate **1s** was arylated following the general arylation procedure except the use of HFIP (1.0 mL) as solvent instead of PhCF<sub>3</sub> (0.5 mL). After purification by preparative thin-layer chromatography (Hexane : EtOAc = 10:1 as eluent), **3t** E/Z (11:1) was obtained as a colorless oil (21.4 mg, 70%). <sup>1</sup>H NMR (600 MHz, CDCl<sub>3</sub>) of E isomer (major) δ 7.12-7.05 (m, 4H), 3.65 (s, 3H), 2.75-2.72 (m, 1H), 2.66-2.62 (m, 1H), 2.47-2.42 (m, 1H), 2.28 (s, 3H), 1.77 (s, 3H), 1.53-1.47 (m, 2H), 1.44 (s, 3H), 1.40 (s, 3H), 0.81 (t, *J* = 7.2 Hz, 3H). <sup>13</sup>C NMR (150 MHz, CDCl<sub>3</sub>) of E isomer (major) δ 175.14, 159.35, 138.34, 136.16, 130.18, 129.60, 126.02, 125.61, 80.69, 51.84, 47.02, 36.26, 24.72, 24.15, 23.95, 19.51, 11.58, 11.55. HRMS (ESI-TOF) Calcd for C<sub>18</sub>H<sub>28</sub>NO<sub>3</sub><sup>+</sup> [M+H]<sup>+</sup>: 306.2064, found: 306.2069.

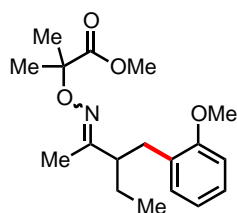

**Methyl 2-(((3-(2-methoxybenzyl)pentan-2-ylidene)amino)oxy)-2-methylpropanoate (3u)**

Substrate **1s** was arylated following the general arylation procedure. After purification by preparative thin-layer chromatography (Hexane : EtOAc = 10:1 as eluent), **3u** E/Z (9.1:1) was obtained as a colorless oil (21.2 mg, 66%). <sup>1</sup>H NMR (600 MHz, CDCl<sub>3</sub>) of E isomer (major) δ 7.15-7.13 (m, 1H), 7.07-7.05 (m, 1H), 6.85-6.82 (m, 1H), 6.81-6.80 (m, 1H), 3.80 (s, 3H), 3.64 (s, 3H), 2.74-2.66 (m, 2H), 2.53-2.48 (m, 1H), 1.77 (s, 3H), 1.49-1.44 (m, 2H), 1.42 (s, 3H), 1.36 (s, 3H), 0.81 (t, *J* = 7.2 Hz, 3H). <sup>13</sup>C NMR (150 MHz, CDCl<sub>3</sub>) of E isomer (major) δ 175.21, 159.60, 157.51, 130.52, 128.57, 127.07, 120.14, 110.12, 80.54, 55.16, 51.80, 46.75, 32.97, 24.82, 24.17, 23.89, 11.52, 11.47. HRMS (ESI-TOF) Calcd for C<sub>18</sub>H<sub>28</sub>NO<sub>4</sub><sup>+</sup> [M+H]<sup>+</sup>: 322.2013, found: 322.2008.

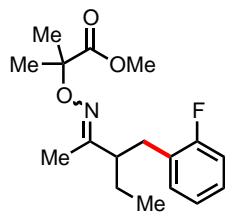

**Methyl 2-(((3-(2-fluorobenzyl)pentan-2-ylidene)amino)oxy)-2-methylpropanoate (3v)**

Substrate **3v** was arylated following the general arylation procedure. After purification by preparative thin-layer chromatography (Hexane : EtOAc = 10:1 as eluent), **3v** E/Z (10:1) was obtained as a colorless oil (24.1 mg, 78%). <sup>1</sup>H NMR (600 MHz, CDCl<sub>3</sub>) of E isomer (major) δ 7.16-7.11 (m, 2H), 7.03-7.00 (m, 1H), 6.98-6.95 (m, 1H), 3.64 (s, 3H), 2.78-2.71 (m, 2H), 2.53-2.48 (m, 1H), 1.78 (s, 3H), 1.52-1.47 (m, 2H), 1.42 (s, 3H), 1.35 (s, 3H), 0.83 (t, *J* = 7.2 Hz, 3H). <sup>13</sup>C NMR (150 MHz, CDCl<sub>3</sub>) of E isomer (major) δ 175.08, 161.15 (d, *J* = 242.8 Hz), 158.83, 131.20 (d, *J* = 4.4 Hz), 127.58 (d, *J* = 8.8 Hz), 127.00 (d, *J* = 15.3 Hz), 123.73 (d, *J* = 3.2 Hz), 115.06 (d, *J* = 21.0 Hz), 80.66, 51.83, 47.23, 31.51, 24.81, 24.14, 23.86, 11.52, 11.34. HRMS (ESI-TOF) Calcd for C<sub>17</sub>H<sub>25</sub>FNO<sub>3</sub><sup>+</sup> [M+H]<sup>+</sup>: 310.1813, found: 310.1819.

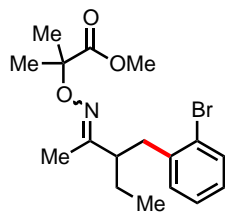

**Methyl 2-(((3-(2-bromobenzyl)pentan-2-ylidene)amino)oxy)-2-methylpropanoate (3w)**

Substrate **1s** was arylated following the general arylation procedure except the use of HFIP (1.0 mL) as solvent instead of PhCF<sub>3</sub> (0.5 mL). After purification by preparative thin-layer chromatography (Hexane : EtOAc = 10:1 as eluent), **3w** E/Z (9.1:1) was obtained as a colorless oil (25.9 mg, 70%). <sup>1</sup>H NMR (600 MHz, CDCl<sub>3</sub>) of E isomer (major) δ 7.51-7.49 (m, 1H), 7.20-7.18 (m, 1H), 7.16-7.14 (m, 1H), 7.04-7.01 (m, 1H), 3.66 (s, 3H), 2.89-2.85 (m, 1H), 2.83-2.80 (m, 1H), 2.61-2.56 (m, 1H), 1.79 (s, 3H), 1.56-1.46 (m, 2H), 1.44 (s, 3H), 1.38 (s, 3H), 0.84 (t, *J* = 7.2 Hz, 3H). <sup>13</sup>C NMR (150 MHz, CDCl<sub>3</sub>) of E isomer (major) δ 175.08, 158.78, 139.49, 132.73, 131.16, 127.61, 127.09, 80.71, 51.86, 46.64, 38.54, 24.83, 24.18, 23.93, 12.05, 11.37. HRMS (ESI-TOF) Calcd for C<sub>17</sub>H<sub>25</sub>BrNO<sub>3</sub><sup>+</sup> [M+H]<sup>+</sup>: 370.1012, found: 370.1018.

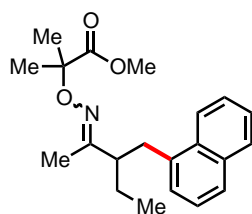

**Methyl 2-methyl-2-(((3-(naphthalen-1-ylmethyl)pentan-2-ylidene)amino)oxy)propanoate (3x)**

Substrate **1s** was arylated following the general arylation procedure except the use of HFIP (1.0 mL) as solvent instead of PhCF<sub>3</sub> (0.5 mL) and the reaction temperature is 100 °C. After purification by preparative thin-layer chromatography (Hexane : EtOAc = 10:1 as eluent), **3x** E/Z (9.1:1) was obtained as a colorless oil (23.9 mg, 70%). <sup>1</sup>H NMR (600 MHz, CDCl<sub>3</sub>) of E isomer (major) δ 7.99 (d, *J* = 8.4 Hz, 1H), 7.83 (d, *J* = 7.8 Hz, 1H), 7.69 (d, *J* = 8.4 Hz, 1H), 7.51-7.48 (m, 1H), 7.47-7.44 (m, 1H), 7.37-7.34 (m, 1H), 7.27-7.26 (m, 1H), 3.63 (s, 3H), 3.25-3.21 (m, 1H), 3.08-3.04 (m, 1H), 2.69-2.64 (m, 1H), 1.81 (s, 3H), 1.57-1.52 (m, 2H), 1.45 (s, 3H), 1.39 (s, 3H), 0.81 (t, *J* = 7.2 Hz, 3H). <sup>13</sup>C NMR (150 MHz, CDCl<sub>3</sub>) of E isomer (major) δ 175.08, 159.40, 136.17, 133.88, 131.96, 128.73, 126.96, 126.78, 125.79, 125.36, 125.26, 123.84, 80.71, 51.81, 47.36, 36.02, 24.87, 24.15, 23.96, 11.66, 11.43. HRMS (ESI-TOF) Calcd for C<sub>21</sub>H<sub>28</sub>NO<sub>3</sub><sup>+</sup> [M+H]<sup>+</sup>: 342.2064, found: 342.2061.

## The Scope of Heteroaryl Iodides

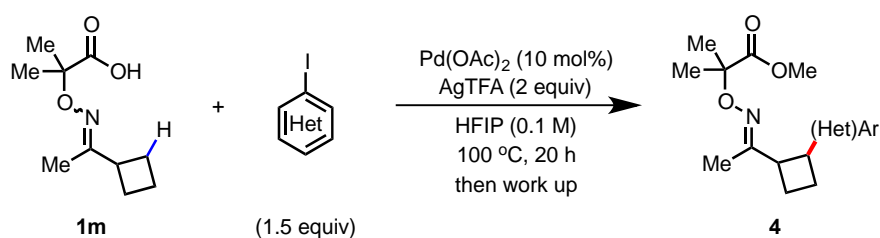

**General Procedure for  $\beta$ -C(sp<sup>3</sup>)-H Heteroarylation of **1m**:** Substrate **1m** (0.10 mmol, 19.9 mg), (Het)ArI (0.15 mmol), Pd(OAc)<sub>2</sub> (0.01 mmol, 2.3 mg), and AgTFA (0.20 mmol, 44.2 mg) were weighed into a reaction vial (10 mL) with a magnetic stir bar under air. HFIP (1.0 mL) was added, and the vial was sealed with a cap. The reaction mixture was stirred at 100 °C for 20 hours. Upon completion, the reaction mixture was cooled to room temperature and diluted with EtOAc. Then the reaction mixture was filtered through a short celite plug and transferred to a reaction vial (10 mL) with a magnetic stir bar. The solvent was evaporated under vacuum. Anhydrous MeOH (1.0 mL) was added to the mixture. SOCl<sub>2</sub> (0.30 mmol, 22  $\mu$ L) was added dropwise at room temperature. The reaction mixture was stirred at room temperature for 30 min. Upon completion, the solvent was removed under vacuum and the resulting mixture was purified by preparative thin-layer chromatography. The assignment of cis/trans structure was based on <sup>1</sup>H NMR patterns by comparing with literatures.<sup>2</sup>

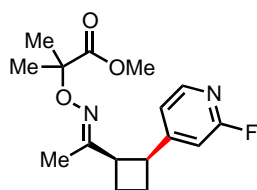

### Methyl

#### 2-(((*E*)-(1-(2-(2-fluoropyridin-4-yl)cyclobutyl)ethylidene)amino)oxy)-2-methylpropanoate (**4a**)

Substrate **1m** was arylated following the general arylation procedure. After purification by preparative thin-layer chromatography (Hexane : EtOAc = 5:1 as eluent), **4a** was obtained as a colorless oil (21.3 mg, 69%). <sup>1</sup>H NMR (600 MHz, CDCl<sub>3</sub>)  $\delta$  8.08 (d, *J* = 5.4 Hz, 1H), 7.02-7.01 (m, 1H), 6.77 (s, 1H), 3.74 (q, *J* = 9.0 Hz, 1H), 3.69 (s, 3H), 3.01 (q, *J* = 9.0 Hz, 1H), 2.26-2.22 (m, 1H), 2.20-2.15 (m, 1H), 2.14-2.08 (m, 1H), 2.01-1.95 (m, 1H), 1.83 (s, 3H), 1.52 (s, 3H), 1.49 (s, 3H). <sup>13</sup>C NMR (150 MHz, CDCl<sub>3</sub>)  $\delta$  174.80, 164.05 (d, *J* = 236.0 Hz), 159.43 (d, *J* = 8.2 Hz), 157.91, 147.15 (d, *J* = 15.4 Hz), 119.79, 107.32 (d, *J* = 36.2 Hz), 81.10, 51.98, 47.36, 41.11, 24.24, 24.06, 23.94, 23.56, 12.42. HRMS (ESI-TOF) Calcd for C<sub>16</sub>H<sub>22</sub>FN<sub>2</sub>O<sub>3</sub><sup>+</sup> [M+H]<sup>+</sup>: 309.1609, found: 309.1615.

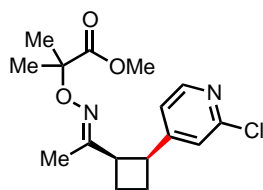



### Methyl

#### 2-(((E)-1-(2-(2-chloropyridin-4-yl)cyclobutyl)ethylidene)amino)oxy)-2-methylpropanoate (4b)

Substrate **1m** was arylated following the general arylation procedure. After purification by preparative thin-layer chromatography (Hexane : EtOAc = 5:1 as eluent), **4b** was obtained as a colorless oil (22.8 mg, 70%). <sup>1</sup>H NMR (600 MHz, CDCl<sub>3</sub>) δ 8.25 (d, *J* = 4.8 Hz, 1H), 7.18 (s, 1H), 7.06 (d, *J* = 4.8 Hz, 1H), 3.73-3.68 (m, 1H), 3.69 (s, 3H), 3.00 (q, *J* = 9.6 Hz, 1H), 2.25-2.20 (m, 1H), 2.20-2.15 (m, 1H), 2.13-2.06 (m, 1H), 2.00-1.94 (m, 1H), 1.83 (s, 3H), 1.52 (s, 3H), 1.49 (s, 3H). <sup>13</sup>C NMR (150 MHz, CDCl<sub>3</sub>) δ 174.76, 157.88, 156.74, 151.51, 149.29, 122.36, 120.89, 81.09, 52.01, 47.30, 40.94, 24.23, 24.07, 23.89, 23.61, 12.43. HRMS (ESI-TOF) Calcd for C<sub>16</sub>H<sub>22</sub>ClN<sub>2</sub>O<sub>3</sub><sup>+</sup> [M+H]<sup>+</sup>: 325.1313, found: 325.1310.

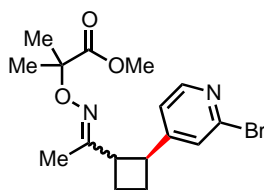

### Methyl

#### 2-(((E)-1-(2-(2-bromopyridin-4-yl)cyclobutyl)ethylidene)amino)oxy)-2-methylpropanoate (4c)

Substrate **1m** was arylated following the general arylation procedure. After purification by preparative thin-layer chromatography (Hexane : EtOAc = 5:1 as eluent), **4c** cis/trans (3.0:1) was obtained as a colorless oil (25.1 mg, 68%). <sup>1</sup>H NMR (600 MHz, CDCl<sub>3</sub>) of cis isomer (major) δ 8.23 (d, *J* = 5.4 Hz, 1H), 7.33 (s, 1H), 7.10-7.09 (m, 1H), 3.71-3.67 (m, 1H), 3.70 (s, 3H), 3.00 (q, *J* = 9.6 Hz, 1H), 2.25-2.15 (m, 2H), 2.12-2.06 (m, 1H), 2.00-1.94 (m, 1H), 1.83 (s, 3H), 1.51 (s, 3H), 1.49 (s, 3H). <sup>13</sup>C NMR (150 MHz, CDCl<sub>3</sub>) of cis isomer (major) δ 174.77, 156.51, 149.74, 149.62, 142.32, 126.19, 121.32, 81.11, 52.06, 47.30, 40.88, 24.24, 24.09, 23.90, 23.62, 12.45. HRMS (ESI-TOF) Calcd for C<sub>16</sub>H<sub>22</sub>BrN<sub>2</sub>O<sub>3</sub><sup>+</sup> [M+H]<sup>+</sup>: 369.0808, found: 369.0802.

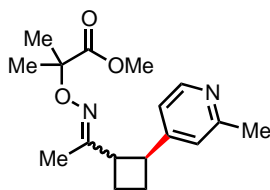

### Methyl

#### 2-(((E)-1-(2-(2-methylpyridin-4-yl)cyclobutyl)ethylidene)amino)oxy)-2-methylpropanoate (4d)

Substrate **1m** was arylated following the general arylation procedure except after the methyl ester formation, 1 mL of NaOH (aq. 2 M) was added to neutralize protonated product. After purification by preparative thin-layer chromatography (Hexane : EtOAc = 5:1 as eluent), **4d** cis/trans (1:1.4) was obtained as a colorless oil (17.6 mg, 58%). <sup>1</sup>H NMR (600 MHz, CDCl<sub>3</sub>) of cis/trans mixture δ 8.37-8.35 (m, 2.4H), 7.01 (s, 1H), 6.99 (s, 1.4H), 6.95-6.93 (m, 1H), 6.92-6.91 (m, 1.4H), 3.79-3.73 (m, 5.8H), 3.70 (s, 3H), 3.63 (q, *J* = 9.6 Hz, 1H), 3.48-3.44 (m,

1.4H), 3.00 (q,  $J = 9.6$  Hz, 1H), 2.52 (s, 7.4H), 2.47-2.41 (m, 1.5H), 2.33-1.97 (m, 9.2H), 1.82 (s, 3H), 1.51 (s, 3H), 1.49 (s, 3H), 1.42 (s, 8.3H), 1.35 (s, 4.1H).  $^{13}\text{C}$  NMR (150 MHz,  $\text{CDCl}_3$ ) of cis/trans mixture  $\delta$  174.90, 174.84, 158.20, 158.05, 157.99, 156.21, 153.46, 151.20, 148.81, 148.69, 122.50, 121.51, 120.20, 119.07, 81.00, 80.82, 51.93, 51.90, 47.30, 45.57, 42.37, 41.53, 24.30, 24.18, 24.10, 24.09, 24.03, 23.30, 20.71, 14.58, 12.43. HRMS (ESI-TOF) Calcd for  $\text{C}_{17}\text{H}_{25}\text{N}_2\text{O}_3^+$   $[\text{M}+\text{H}]^+$ : 305.1860, found: 305.1866.

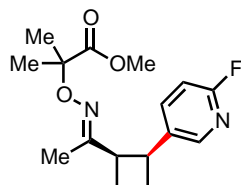

### Methyl

#### 2-(((*E*)-1-(2-(6-fluoropyridin-3-yl)cyclobutyl)ethylidene)amino)oxy)-2-methylpropanoate (**4e**)

Substrate **1m** was arylated following the general arylation procedure. After purification by preparative thin-layer chromatography (Hexane : EtOAc = 5:1 as eluent), **4e** was obtained as a colorless oil (21.6 mg, 70%).  $^1\text{H}$  NMR (600 MHz,  $\text{CDCl}_3$ )  $\delta$  8.04-8.03 (m, 1H), 7.67-7.64 (m, 1H), 6.83 (dd,  $J_1 = 3.0$  Hz,  $J_2 = 8.4$  Hz, 1H), 3.70-3.66 (m, 1H), 3.69 (s, 3H), 2.96 (q,  $J = 9.0$  Hz, 1H), 2.25-2.21 (m, 1H), 2.19-2.14 (m, 1H), 2.13-2.09 (m, 1H), 2.02-1.95 (m, 1H), 1.81 (s, 3H), 1.51 (s, 3H), 1.48 (s, 3H).  $^{13}\text{C}$  NMR (150 MHz,  $\text{CDCl}_3$ )  $\delta$  174.83, 162.26 (d,  $J = 236.4$  Hz), 158.13, 145.71 (d,  $J = 14.2$  Hz), 139.63 (d,  $J = 7.8$  Hz), 137.19 (d,  $J = 4.8$  Hz), 108.76 (d,  $J = 37.2$  Hz), 81.05, 52.01, 48.09, 39.23, 24.56, 24.20, 24.07, 23.58, 12.44. HRMS (ESI-TOF) Calcd for  $\text{C}_{16}\text{H}_{22}\text{FN}_2\text{O}_3^+$   $[\text{M}+\text{H}]^+$ : 309.1609, found: 309.1616.

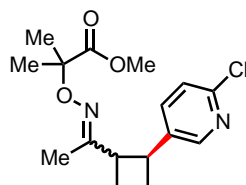

### Methyl

#### 2-(((*E*)-1-(2-(6-chloropyridin-3-yl)cyclobutyl)ethylidene)amino)oxy)-2-methylpropanoate (**4f**)

Substrate **1m** was arylated following the general arylation procedure. After purification by preparative thin-layer chromatography (Hexane : EtOAc = 5:1 as eluent), **4f** cis/trans (7.1:1) was obtained as a colorless oil (21.1 mg, 65%).  $^1\text{H}$  NMR (600 MHz,  $\text{CDCl}_3$ ) of cis isomer (major)  $\delta$  8.22 (d,  $J = 2.4$  Hz, 1H), 7.53 (dd,  $J_1 = 2.4$  Hz,  $J_2 = 8.4$  Hz, 1H), 7.23 (d,  $J = 7.8$  Hz, 1H), 3.69 (s, 3H), 3.69-3.65 (m, 1H), 2.96 (q,  $J = 9.0$  Hz, 1H), 2.25-2.21 (m, 1H), 2.19-2.15 (m, 1H), 2.13-2.07 (m, 1H), 2.02-1.95 (m, 1H), 1.81 (s, 3H), 1.50 (s, 3H), 1.48 (s, 3H).  $^{13}\text{C}$  NMR (150 MHz,  $\text{CDCl}_3$ ) cis isomer (major)  $\delta$  174.82, 158.06, 148.23, 138.48, 137.34, 123.65, 81.06, 52.03, 57.96, 39.33, 24.40, 24.21, 24.10, 23.62, 12.47. HRMS (ESI-TOF) Calcd for  $\text{C}_{16}\text{H}_{22}\text{ClN}_2\text{O}_3^+$   $[\text{M}+\text{H}]^+$ : 325.1313, found: 325.1317.

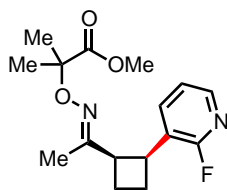

### Methyl

#### 2-(((*E*)-1-(2-(2-fluoropyridin-3-yl)cyclobutyl)ethylidene)amino)oxy)-2-methylpropanoate (**4g**)

Substrate **1m** was arylated following the general arylation procedure. After purification by preparative thin-layer chromatography (Hexane : EtOAc = 5:1 as eluent), **4g** was obtained as a colorless oil (16.0 mg, 52%). <sup>1</sup>H NMR (600 MHz, CDCl<sub>3</sub>) δ 8.03 (d, *J* = 4.8 Hz, 1H), 7.68-7.64 (m, 1H), 7.13-7.10 (m, 1H), 3.71 (q, *J* = 9.6 Hz, 1H), 3.64 (s, 3H), 3.19 (q, *J* = 9.0 Hz, 1H), 2.31-2.26 (m, 1H), 2.16-2.03 (m, 3H), 1.85 (s, 3H), 1.47 (s, 3H), 1.46 (s, 3H). <sup>13</sup>C NMR (150 MHz, CDCl<sub>3</sub>) δ 174.86, 161.56 (d, *J* = 238.4 Hz), 157.94, 144.94 (d, *J* = 14.2 Hz), 138.86 (d, *J* = 6.3 Hz), 125.68 (d, *J* = 29.6 Hz), 121.24 (d, *J* = 3.4 Hz), 81.00, 51.88, 45.88, 37.20 (d, *J* = 3.3 Hz), 25.08 (d, *J* = 2.0 Hz), 24.12, 24.06, 23.26. HRMS (ESI-TOF) Calcd for C<sub>16</sub>H<sub>22</sub>FN<sub>2</sub>O<sub>3</sub><sup>+</sup> [M+H]<sup>+</sup>: 309.1609, found: 309.1615.

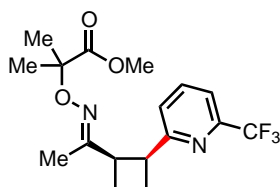

### Methyl

#### 2-methyl-2-(((*E*)-1-(2-(6-(trifluoromethyl)pyridin-2-yl)cyclobutyl)ethylidene)amino)oxy)propanoate (**4h**)

Substrate **1m** was arylated following the general arylation procedure. After purification by preparative thin-layer chromatography (Hexane : EtOAc = 5:1 as eluent), **4h** was obtained as a colorless oil (19.7 mg, 55%). <sup>1</sup>H NMR (600 MHz, CDCl<sub>3</sub>) δ 7.72 (t, *J* = 7.8 Hz, 1H), 7.47 (d, *J* = 7.8 Hz, 1H), 7.33 (t, *J* = 8.4 Hz, 1H), 3.80 (q, *J* = 9.0 Hz, 1H), 3.66 (s, 3H), 3.26 (q, *J* = 9.6 Hz, 1H), 2.46-2.39 (m, 1H), 2.18-2.13 (m, 2H), 2.05-1.98 (m, 1H), 1.79 (s, 3H), 1.50 (s, 3H), 1.46 (s, 3H). <sup>13</sup>C NMR (150 MHz, CDCl<sub>3</sub>) δ 174.98, 163.53, 158.62, 147.61 (q, *J* = 33.9 Hz), 137.05, 125.02, 121.65 (q, *J* = 272.7 Hz), 117.74 (q, *J* = 3.0 Hz), 80.97, 51.85, 46.28, 44.46, 24.13, 24.05, 23.54, 22.91, 12.58. HRMS (ESI-TOF) Calcd for C<sub>17</sub>H<sub>22</sub>F<sub>3</sub>N<sub>2</sub>O<sub>3</sub><sup>+</sup> [M+H]<sup>+</sup>: 359.1577, found: 359.1580.

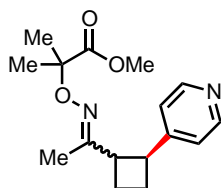

### (*E*)-Methyl

#### 2-methyl-2-(((1-(2-(pyridin-4-yl)cyclobutyl)ethylidene)amino)oxy)propanoate (**4i**)

Substrate **1m** was arylated following the general arylation procedure except the reaction

temperature was 120 °C and after the methyl ester formation, 1 mL of NaOH (aq. 2 M) was added to neutralize protonated product. After purification by preparative thin-layer chromatography (Hexane : EtOAc = 2:1 as eluent), **4i** cis/trans (1:1.8) was obtained as a colorless oil (12.2 mg, 42%). <sup>1</sup>H NMR (600 MHz, CDCl<sub>3</sub>) of cis/trans mixture δ 8.49-8.47 (m, 5.6H), 7.14-7.11 (m, 5.6H), 3.81 (q, *J* = 9.0 Hz, 1.8H), 3.74 (s, 5.4H), 3.71-3.66 (m, 1H), 3.67 (s, 3H), 3.51-3.46 (m, 1.8H), 3.01 (q, *J* = 9.0 Hz, 1H), 2.48-2.42 (m, 2H), 2.38-1.96 (m, 12H), 1.82 (s, 3H), 1.51 (s, 3H), 1.49 (s, 3H), 1.42 (s, 5.3H), 1.41 (s, 5.3H), 1.35 (s, 5.3H). <sup>13</sup>C NMR (150 MHz, CDCl<sub>3</sub>) of cis/trans mixture δ 174.92, 174.85, 158.12, 156.03, 153.27, 151.03, 149.44, 149.37, 123.07, 122.03, 81.06, 80.87, 51.95, 47.36, 45.58, 42.40, 41.49, 24.21, 24.15, 24.13, 24.08, 24.06, 23.39, 20.72, 24.56, 12.44. HRMS (ESI-TOF) Calcd for C<sub>16</sub>H<sub>23</sub>N<sub>2</sub>O<sub>3</sub><sup>+</sup> [M+H]<sup>+</sup>: 291.1703, found: 291.1709.

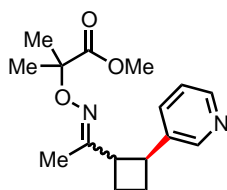

#### (*E*)-Methyl

#### 2-methyl-2-(((1-(2-(pyridin-3-yl)cyclobutyl)ethylidene)amino)oxy)propanoate (**4j**)

Substrate **1m** was arylated following the general arylation procedure except the reaction temperature was 120 °C and after the methyl ester formation, 1 mL of NaOH (aq. 2 M) was added to neutralize protonated product. After purification by preparative thin-layer chromatography (Hexane : EtOAc = 2:1 as eluent), **4j** cis/trans (1:2.5) was obtained as a colorless oil (13.3 mg, 46%). <sup>1</sup>H NMR (600 MHz, CDCl<sub>3</sub>) of cis/trans mixture δ 8.47-8.42 (m, 7.2H), 7.59-7.54 (m, 3.6H), 7.23-7.19 (m, 3.6H), 3.86 (q, *J* = 9.0 Hz, 2.6H), 3.75 (s, 7.6H), 3.71-3.66 (m, 1H), 3.68 (s, 3H), 3.48-3.44 (m, 2.5H), 3.01 (q, *J* = 9.0 Hz, 1H), 2.52-2.46 (m, 2.6H), 2.38-2.34 (m, 2.6H), 2.30-2.23 (m, 4.5H), 2.18-2.11 (m, 4.5H), 2.04-1.99 (m, 1H), 1.81 (s, 3H), 1.50 (s, 3H), 1.48 (s, 3H), 1.44 (s, 15.0H), 1.31 (s, 7.5H), 1.35 (s, 5.3H). <sup>13</sup>C NMR (150 MHz, CDCl<sub>3</sub>) of cis/trans mixture δ 174.99, 174.88, 158.20, 156.05, 149.42, 148.50, 147.67, 147.38, 139.46, 137.15, 135.02, 134.90, 134.24, 123.09, 81.02, 80.87, 51.98, 51.95, 47.87, 45.70, 42.03, 40.65, 40.18, 39.16, 24.54, 24.19, 24.15, 24.09, 23.44, 20.50, 14.79, 12.46. HRMS (ESI-TOF) Calcd for C<sub>16</sub>H<sub>23</sub>N<sub>2</sub>O<sub>3</sub><sup>+</sup> [M+H]<sup>+</sup>: 291.1703, found: 291.1708.

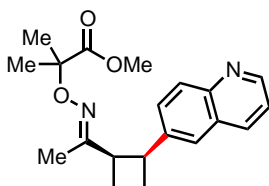

#### Methyl

#### 2-methyl-2-(((*E*)-1-(2-(quinolin-6-yl)cyclobutyl)ethylidene)amino)oxy)propanoate (**4k**)

Substrate **1m** was arylated following the general arylation procedure except after the methyl ester formation, 1 mL of NaOH (aq. 2 M) was added to neutralize protonated product. After purification by preparative thin-layer chromatography (Hexane : EtOAc = 3:1 as eluent), **4k** was obtained as a colorless oil (19.7 mg, 58%). <sup>1</sup>H NMR (600 MHz, CDCl<sub>3</sub>) δ 8.85 (dd, *J*<sub>1</sub> =

1.8 Hz,  $J_2 = 4.2$  Hz, 1H), 8.13 (d,  $J = 8.4$  Hz, 1H), 8.01 (d,  $J = 8.4$  Hz, 1H), 7.64-7.62 (m, 2H), 7.37 (dd,  $J_1 = 4.2$  Hz,  $J_2 = 7.8$  Hz, 1H), 3.85 (q,  $J = 9.0$  Hz, 1H), 3.64 (s, 3H), 3.11 (q,  $J = 9.6$  Hz, 1H), 2.33-2.28 (m, 1H), 2.25-2.15 (m, 2H), 2.08-2.02 (m, 1H), 1.85 (s, 3H), 1.53 (s, 3H), 1.41 (s, 3H).  $^{13}\text{C}$  NMR (150 MHz,  $\text{CDCl}_3$ )  $\delta$  174.96, 158.55, 149.69, 147.17, 142.80, 135.76, 129.19, 129.08, 124.54, 121.06, 81.00, 51.94, 48.04, 42.57, 24.88, 24.22, 24.12, 23.15, 12.49. HRMS (ESI-TOF) Calcd for  $\text{C}_{20}\text{H}_{25}\text{N}_2\text{O}_3^+$   $[\text{M}+\text{H}]^+$ : 341.1860, found: 341.1867.

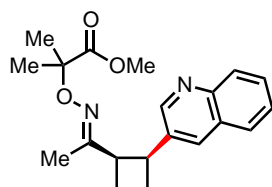

### Methyl

#### 2-methyl-2-(((*E*)-(1-(2-(quinolin-3-yl)cyclobutyl)ethylidene)amino)oxy)propanoate (**4l**)

Substrate **1m** was arylated following the general arylation procedure. After purification by preparative thin-layer chromatography (Hexane : EtOAc = 3:1 as eluent), **4k** was obtained as a colorless oil (17.0 mg, 50%).  $^1\text{H}$  NMR (600 MHz,  $\text{CDCl}_3$ )  $\delta$  8.74-8.73 (m, 1H), 8.07 (d,  $J = 8.4$  Hz, 1H), 8.03 (s, 1H), 7.82 (d,  $J = 8.4$  Hz, 1H), 7.68-7.65 (m, 1H), 7.54-7.52 (m, 1H), 4.05 (q,  $J = 8.4$  Hz, 1H), 3.73 (s, 3H), 3.55-3.51 (m, 1H), 2.57-2.52 (m, 1H), 2.44-2.40 (m, 2H), 2.23-2.16 (m, 1H), 1.40 (s, 3H), 1.39 (s, 3H), 1.29 (s, 3H).  $^{13}\text{C}$  NMR (150 MHz,  $\text{CDCl}_3$ )  $\delta$  174.95, 156.05, 151.40, 146.92, 134.53, 133.76, 128.99, 128.78, 128.04, 127.66, 126.56, 80.88, 51.95, 46.02, 40.82, 24.72, 24.16, 24.13, 20.55, 15.02. HRMS (ESI-TOF) Calcd for  $\text{C}_{20}\text{H}_{25}\text{N}_2\text{O}_3^+$   $[\text{M}+\text{H}]^+$ : 341.1860, found: 341.1868.

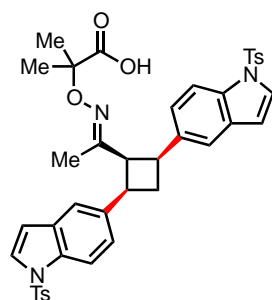

#### 2-(((*E*)-(1-(2,4-bis(1-tosyl-1*H*-indol-5-yl)cyclobutyl)ethylidene)amino)oxy)-2-methylpropanoic acid (**4m**)

Substrate **1m** was arylated following the general arylation procedure except 2.0 equiv of heteroaryl iodide and AgOAc were used and the reaction temperature was 80 °C. The product was isolated as the acid form without further esterification. After purification by preparative thin-layer chromatography (Hexane : EtOAc : HOAc = 1:1:0.01 as eluent), **4m** was obtained as a colorless oil (55.4 mg, 75%).  $^1\text{H}$  NMR (600 MHz,  $\text{CDCl}_3$ )  $\delta$  7.87 (d,  $J = 8.4$  Hz, 2H), 7.74-7.72 (m, 4H), 7.51 (d,  $J = 3.6$  Hz, 2H), 7.27 (s, 2H), 7.21-7.19 (m, 4H), 7.05 (dd,  $J_1 = 1.2$  Hz,  $J_2 = 8.4$  Hz, 2H), 6.58 (dd,  $J_1 = 0.6$  Hz,  $J_2 = 3.6$  Hz, 2H), 4.13-4.08 (m, 2H), 4.06-4.03 (m, 1H), 3.03 (q,  $J = 10.8$  Hz, 1H), 2.80-2.75 (m, 1H), 2.32 (s, 6H), 1.04 (s, 3H), 0.90 (s, 6H).  $^{13}\text{C}$  NMR (150 MHz,  $\text{CDCl}_3$ )  $\delta$  175.33, 160.41, 144.86, 135.91, 135.19, 133.30, 130.91, 129.81, 126.75, 126.68, 123.40, 118.99, 113.29, 108.98, 80.83, 51.80, 38.25, 29.75, 23.59.

21.49, 16.33. HRMS (ESI-TOF) Calcd for  $C_{40}H_{38}N_3O_7S_2^-$  [M-H]<sup>-</sup>: 736.2157, found: 736.2162.

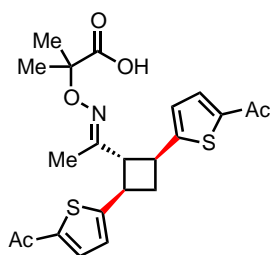

**2-(((E)-1-(2,4-bis(5-acetylthiophen-2-yl)cyclobutyl)ethylidene)amino)oxy)-2-methylpropanoic acid (4o)**

Substrate **1m** was arylated following the general arylation procedure except 2.0 equiv of heteroaryl iodide was used and the reaction temperature was 80 °C. The product was isolated as the acid form without further esterification. After purification by preparative thin-layer chromatography (Hexane : EtOAc : HOAc = 1:1:0.02 as eluent), **4o** was obtained as a colorless oil (29.1 mg, 65%). <sup>1</sup>H NMR (600 MHz, CDCl<sub>3</sub>) δ 7.56 (d, *J* = 3.6 Hz, 1H), 6.92 (d, *J* = 3.6 Hz, 1H), 3.74 (q, *J* = 10.2 Hz, 2H), 3.09 (t, *J* = 9.6 Hz, 1H), 2.89-2.85 (m, 1H), 2.53 (s, 6H), 2.35 (q, *J* = 10.2 Hz, 1H), 1.79 (s, 3H), 1.56 (s, 6H). <sup>13</sup>C NMR (150 MHz, CDCl<sub>3</sub>) δ 190.68, 176.78, 157.18, 156.42, 142.74, 132.97, 125.03, 81.42, 59.11, 36.24, 36.07, 26.48, 24.14, 13.49. HRMS (ESI-TOF) Calcd for  $C_{22}H_{24}NO_5S_2^-$  [M-H]<sup>-</sup>: 446.1101, found: 446.1100.

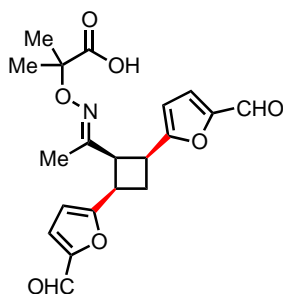

**2-(((E)-1-(2,4-bis(5-formylfuran-2-yl)cyclobutyl)ethylidene)amino)oxy)-2-methylpropanoic acid (4p)**

Substrate **1m** was arylated following the general arylation procedure except 2.0 equiv of heteroaryl iodide and AgOAc were used and the reaction temperature was 80 °C. The product was isolated as the acid form without further esterification. After purification by preparative thin-layer chromatography (Hexane : EtOAc : HOAc = 1:1:0.02 as eluent), **4p** was obtained as a colorless oil (27.9 mg, 72%). <sup>1</sup>H NMR (600 MHz, CDCl<sub>3</sub>) δ 9.48 (s, 2H), 7.22 (d, *J* = 3.6 Hz, 2H), 6.36 (d, *J* = 3.6 Hz, 2H), 3.94-3.89 (m, 2H), 3.84-3.81 (m, 1H), 3.13 (q, *J* = 10.8 Hz, 1H), 2.70-2.65 (m, 1H), 1.37 (s, 3H), 1.26 (s, 6H). <sup>13</sup>C NMR (150 MHz, CDCl<sub>3</sub>) δ 177.12, 175.56, 161.51, 155.20, 151.83, 124.43, 110.06, 81.48, 50.21, 33.51, 28.20, 23.67, 15.27. HRMS (ESI-TOF) Calcd for  $C_{20}H_{20}NO_7^-$  [M-H]<sup>-</sup>: 386.1245, found: 386.1240.

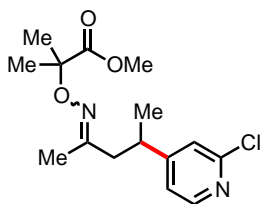

**Methyl 2-(((4-(2-chloropyridin-4-yl)pentan-2-ylidene)amino)oxy)-2-methylpropanoate (4q)**

Substrate **1a** was arylated following the general arylation procedure except the reaction temperature was 120 °C and after the methyl ester formation, 1 mL of NaOH (aq. 2 M) was added to neutralize protonated product. After purification by preparative thin-layer chromatography (Hexane : EtOAc = 5:1 as eluent), **4q** E/Z (5.3:1) was obtained as a colorless oil (12.5 mg, 40%). <sup>1</sup>H NMR (600 MHz, CDCl<sub>3</sub>) of E isomer (major) δ 8.27 (d, *J* = 5.4 Hz, 1H), 7.15 (s, 1H), 7.04 (dd, *J*<sub>1</sub> = 1.8 Hz, *J*<sub>2</sub> = 5.4 Hz, 1H), 3.67 (s, 3H), 3.10-3.04 (m, 1H), 2.49-2.39 (m, 2H), 1.82 (s, 3H), 1.40 (s, 3H), 1.39 (s, 3H), 1.23 (d, *J* = 6.6 Hz, 3H). <sup>13</sup>C NMR (150 MHz, CDCl<sub>3</sub>) of E isomer (major) δ 174.76, 158.90, 155.01, 151.61, 149.60, 122.85, 121.32, 80.81, 51.97, 43.00, 36.06, 24.13, 24.01, 21.28, 14.67. HRMS (ESI-TOF) Calcd for C<sub>15</sub>H<sub>22</sub>ClN<sub>2</sub>O<sub>3</sub><sup>+</sup> [M+H]<sup>+</sup>: 313.1313, found: 313.1309.

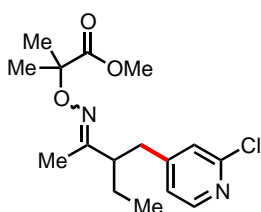

**Methyl 2-(((3-((2-chloropyridin-4-yl)methyl)pentan-2-ylidene)amino)oxy)-2-methylpropanoate (4r)**

Substrate **1s** was arylated following the general arylation procedure except the reaction temperature was 120 °C and after the methyl ester formation, 1 mL of NaOH (aq. 2 M) was added to neutralize protonated product. After purification by preparative thin-layer chromatography (Hexane : EtOAc = 5:1 as eluent), **4r** E/Z (8.3:1) was obtained as a colorless oil (20.3 mg, 62%). <sup>1</sup>H NMR (400 MHz, CDCl<sub>3</sub>) of E isomer (major) δ 8.25 (d, *J* = 5.2 Hz, 1H), 7.11 (s, 1H), 7.00 (dd, *J*<sub>1</sub> = 1.6 Hz, *J*<sub>2</sub> = 5.2 Hz, 1H), 3.65 (s, 3H), 2.79-2.65 (m, 2H), 2.55-2.48 (m, 1H), 1.77 (s, 3H), 1.55-1.47 (m, 2H), 1.42 (s, 3H), 1.38 (s, 3H), 0.85 (t, *J* = 7.2 Hz, 3H). <sup>13</sup>C NMR (150 MHz, CDCl<sub>3</sub>) of E isomer (major) δ 174.81, 157.63, 152.75, 151.45, 149.28, 124.57, 123.11, 80.83, 51.88, 47.13, 37.07, 25.11, 24.10, 23.92, 11.89, 11.06. HRMS (ESI-TOF) Calcd for C<sub>16</sub>H<sub>24</sub>ClN<sub>2</sub>O<sub>3</sub><sup>+</sup> [M+H]<sup>+</sup>: 327.1470, found: 327.1475.

## The Late-Stage $\beta$ -C(sp<sup>3</sup>)-H (Hetero)Arylation of Santonin

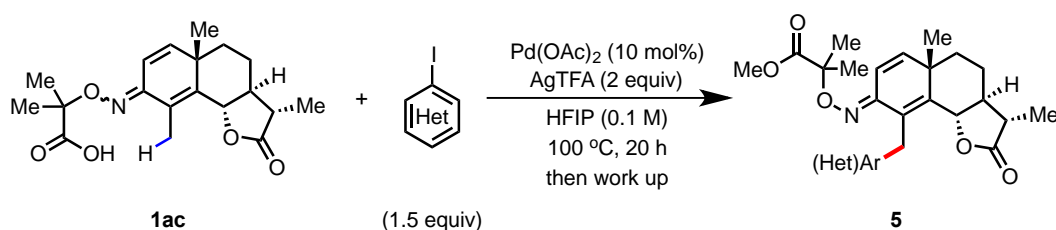

### General Procedure for the Late-Stage $\beta$ -C(sp<sup>3</sup>)-H (Hetero)Arylation of Santonin:

Substrate **1ac** (0.10 mmol, 34.7 mg), (Het)ArI (0.15 mmol), Pd(OAc)<sub>2</sub> (0.01 mmol, 2.3 mg), and AgTFA (0.20 mmol, 44.2 mg) were weighed into a reaction vial (10 mL) with a magnetic stir bar under air. HFIP (1.0 mL) was added, and the vial was sealed with a cap. The reaction mixture was stirred at 100 °C for 20 hours. Upon completion, the reaction mixture was cooled to room temperature and diluted with EtOAc. Then the reaction mixture was filtered through a short celite plug and transferred to a reaction vial (10 mL) with a magnetic stir bar. The solvent was evaporated under vacuum. Anhydrous MeOH (1.0 mL) was added to the mixture. SOCl<sub>2</sub> (0.30 mmol, 22  $\mu$ L) was added dropwise at room temperature. The reaction mixture was stirred at room temperature for 30 min. Upon completion, the solvent was removed under vacuum and the resulting mixture was purified by preparative thin-layer chromatography.

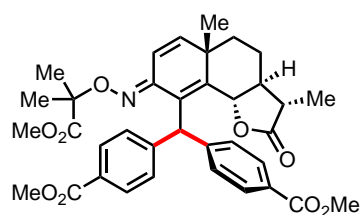

### Dimethyl

#### 4,4'-(((3*S*,3*aS*,5*aS*,9*bS*,*E*)-8-(((1-methoxy-2-methyl-1-oxopropan-2-yl)oxy)imino)-3,5*a*-dimethyl-2-oxo-2,3,3*a*,4,5,5*a*,8,9*b*-octahydronaphtho[1,2-*b*]furan-9-yl)methylene)dibenzoate (**5a**)

Substrate **1ac** was arylated following the general arylation procedure except 2.0 equiv of aryl iodide was used and the reaction temperature was 80 °C. After purification by preparative thin-layer chromatography (Hexane : EtOAc = 1:1 as eluent), **5a** was obtained as a colorless oil (56.6 mg, 90%). <sup>1</sup>H NMR (600 MHz, CDCl<sub>3</sub>)  $\delta$  7.93-7.91 (m, 2H), 7.90-7.88 (m, 2H), 7.28-7.26 (m, 2H), 7.18-7.16 (m, 2H), 6.92 (d, *J* = 10.2 Hz, 1H), 6.58 (s, 1H), 6.02 (d, *J* = 10.2 Hz, 1H), 4.91 (d, *J* = 10.2 Hz, 1H), 3.89 (s, 3H), 3.88 (s, 3H), 3.45 (s, 3H), 2.32-2.25 (m, 1H), 2.01-1.96 (m, 1H), 1.84-1.80 (m, 1H), 1.73-1.54 (m, 3H), 1.37 (s, 3H), 1.11 (d, *J* = 6.6 Hz, 3H), 1.08 (s, 3H), 0.97 (s, 3H). <sup>13</sup>C NMR (150 MHz, CDCl<sub>3</sub>)  $\delta$  176.73, 174.03, 167.17, 167.13, 148.97, 148.00, 147.79, 144.62, 143.96, 129.26, 129.11, 128.40, 127.53, 127.32, 127.08, 113.60, 81.81, 81.38, 53.48, 52.01, 51.88, 51.84, 47.71, 41.98, 40.77, 38.79, 26.20, 24.03, 23.96, 23.71, 12.47. HRMS (ESI-TOF) Calcd for C<sub>36</sub>H<sub>40</sub>NO<sub>9</sub><sup>+</sup> [M+H]<sup>+</sup>: 630.2698, found: 630.2692.



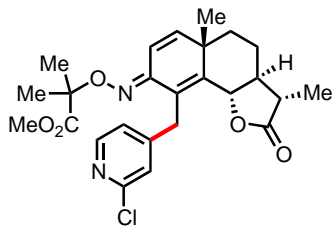

### Methyl

#### 2-(((*E*)-((3*S*,3*aS*,5*aS*,9*bS*)-9-((2-chloropyridin-4-yl)methyl)-3,5*a*-dimethyl-2-oxo-2,3,3*a*,4,5,5*a*-hexahydronaphtho[1,2-*b*]furan-8(9*bH*)-ylidene)amino)oxy)-2-methylpropanoate (**5b**)

Substrate **1ac** was arylated following the general arylation procedure. After purification by preparative thin-layer chromatography (Hexane : EtOAc = 1:1 as eluent), **5b** was obtained as a colorless oil (36.4 mg, 77%). <sup>1</sup>H NMR (600 MHz, CDCl<sub>3</sub>) δ 8.19-8.18 (m, 1H), 7.08-7.07 (m, 1H), 7.04-7.03 (m, 1H), 6.89 (d, *J* = 10.2 Hz, 1H), 6.05 (d, *J* = 10.2 Hz, 1H), 4.80 (d, *J* = 10.8 Hz, 1H), 4.16 (d, *J* = 15.6 Hz, 1H), 4.00 (d, *J* = 15.0 Hz, 1H), 3.54 (s, 3H), 2.35-2.29 (m, 1H), 2.02-1.99 (m, 1H), 1.83-1.79 (m, 1H), 1.69-1.65 (m, 2H), 1.59-1.54 (m, 1H), 1.45 (s, 3H), 1.43 (s, 3H), 1.32 (s, 3H), 1.18 (d, *J* = 6.6 Hz, 3H). <sup>13</sup>C NMR (150 MHz, CDCl<sub>3</sub>) δ 177.20, 174.25, 154.72, 151.15, 148.93, 148.47, 145.30, 142.01, 123.58, 122.72, 113.13, 82.00, 81.59, 53.68, 51.99, 41.17, 40.83, 38.47, 30.36, 25.99, 24.08, 24.00, 23.66, 12.49. HRMS (ESI-TOF) Calcd for C<sub>25</sub>H<sub>30</sub>ClN<sub>2</sub>O<sub>5</sub><sup>+</sup> [M+H]<sup>+</sup>: 473.1838, found: 473.1832.

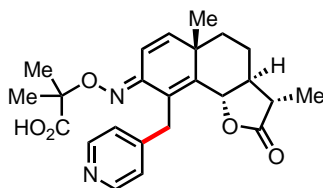

#### 2-(((*E*)-((3*S*,3*aS*,5*aS*,9*bS*)-3,5*a*-Dimethyl-2-oxo-9-(pyridin-4-ylmethyl)-2,3,3*a*,4,5,5*a*-hexahydronaphtho[1,2-*b*]furan-8(9*bH*)-ylidene)amino)oxy)-2-methylpropanoic acid (**5c**)

Substrate **1ac** was arylated following the general arylation procedure except the reaction temperature was 120 °C. The product was isolated as the acid form without further esterification. After purification by preparative thin-layer chromatography (EtOAc : MeOH : HOAc = 40:1:0.2 as eluent), **5c** was obtained as a colorless oil (22.5 mg, 53%). <sup>1</sup>H NMR (600 MHz, CDCl<sub>3</sub>) δ 8.19 (d, *J* = 5.4 Hz, 2H), 7.24 (d, *J* = 5.4 Hz, 2H), 6.97 (d, *J* = 10.2 Hz, 1H), 6.02 (d, *J* = 10.2 Hz, 1H), 4.76 (d, *J* = 11.4 Hz, 1H), 4.27 (d, *J* = 15.0 Hz, 1H), 4.10 (d, *J* = 15.6 Hz, 1H), 2.29-2.23 (m, 1H), 1.97-1.94 (m, 1H), 1.80-1.76 (m, 1H), 1.67-1.49 (m, 3H), 1.56 (s, 3H), 1.54 (s, 3H), 1.30 (s, 3H), 1.11 (d, *J* = 7.2 Hz, 3H). <sup>13</sup>C NMR (150 MHz, CDCl<sub>3</sub>) δ 177.27, 154.56, 147.73, 145.52, 144.68, 141.10, 124.44, 124.02, 113.38, 82.52, 81.66, 53.57, 41.08, 40.80, 38.55, 30.83, 29.68, 25.92, 24.47, 24.05, 23.67, 12.41. HRMS (ESI-TOF) Calcd for C<sub>24</sub>H<sub>27</sub>N<sub>2</sub>O<sub>5</sub><sup>-</sup> [M-H]<sup>-</sup>: 423.1925, found: 423.1920.

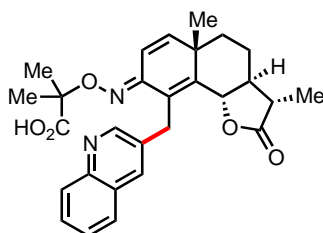

**2-(((*E*)-((3*S*,3*aS*,5*aS*,9*bS*)-3,5*a*-Dimethyl-2-oxo-9-(quinolin-3-ylmethyl)-2,3,3*a*,4,5,5*a*-hexahydronaphtho[1,2-*b*]furan-8(9*bH*)-ylidene)amino)oxy)-2-methylpropanoic acid (**5d**)**

Substrate **1ac** was arylated following the general arylation procedure. The product was isolated as the acid form without further esterification. After purification by preparative thin-layer chromatography (Hexane : EtOAc = 1:2 as eluent), **5d** was obtained as a colorless oil (34.2 mg, 72%). <sup>1</sup>H NMR (600 MHz, CDCl<sub>3</sub>) δ 8.82 (s, 1H), 8.10 (s, 1H), 7.85 (d, *J* = 8.4 Hz, 1H), 7.69 (d, *J* = 7.8 Hz, 1H), 7.42-7.39 (m, 1H), 7.37-7.34 (m, 1H), 6.96 (d, *J* = 10.2 Hz, 1H), 6.02 (d, *J* = 10.2 Hz, 1H), 4.87-4.85 (m, 1H), 4.41 (d, *J* = 15.0 Hz, 1H), 4.22 (d, *J* = 14.4 Hz, 1H), 2.35-2.29 (m, 1H), 1.97-1.94 (m, 1H), 1.79-1.75 (m, 1H), 1.68-1.63 (m, 2H), 1.57 (s, 3H), 1.55 (s, 3H), 1.57-1.51 (m, 1H), 1.30 (s, 3H), 1.11 (d, *J* = 6.6 Hz, 3H). <sup>13</sup>C NMR (150 MHz, CDCl<sub>3</sub>) δ 177.54, 176.95, 150.46, 148.72, 145.04, 143.98, 141.16, 136.79, 134.87, 128.97, 128.13, 127.54, 126.65, 126.60, 125.18, 113.46, 82.34, 81.83, 53.64, 41.18, 40.89, 38.41, 28.27, 25.97, 24.32, 24.13, 23.75, 12.40. HRMS (ESI-TOF) Calcd for C<sub>28</sub>H<sub>29</sub>N<sub>2</sub>O<sub>5</sub><sup>-</sup> [M-H]<sup>-</sup>: 473.2082, found: 473.2080.

**The Scale Up Reaction**

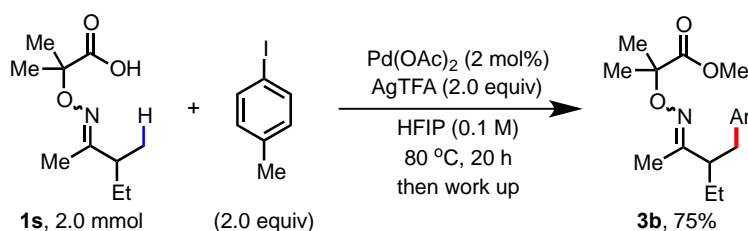

**General Procedure for The Scale Up Reaction:** Substrate **1s** (2.0 mmol, 402 mg), 4-iodotoluene (4.0 mmol, 872 mg), Pd(OAc)<sub>2</sub> (0.04 mmol, 9.0 mg), and AgTFA (4.0 mmol, 884 mg) were weighed into a sealed tube (250 mL) with a magnetic stir bar under air. HFIP (20 mL) was added, and the tube was sealed with a cap. The reaction mixture was stirred at 80 °C for 20 hours. Upon completion, the reaction mixture was cooled to room temperature and diluted with EtOAc. Then the reaction mixture was filtered through a short celite plug and transferred to a reaction round bottom flask (100 mL) with a magnetic stir bar. The solvent was evaporated under vacuum. Anhydrous MeOH (20 mL) was added to the mixture. SOCl<sub>2</sub> (6.0 mmol, 0.44 mL) was added dropwise at room temperature. The reaction mixture was stirred at room temperature for 1 h. Upon completion, the solvent was removed under vacuum and the resulting mixture was purified by flash chromatography by using Hexane/EtOAc (10:1) as the eluent to give 458 mg of **3b** (75% yield).

### The Removal of Auxiliary

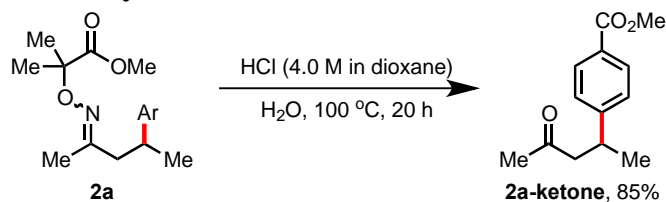

**The General Procedure for the Removal of Auxiliary:** The arylated product **2a** (0.1 mmol, 33.5 mg) was weighed into a reaction vial (10 mL) with a magnetic stir bar under air. 0.25 mL of H<sub>2</sub>O and 1.25 mL of HCl (4 M in dioxane) were added, and the vial was sealed with a cap. The reaction mixture was stirred at 100 °C for 20 hours. Upon completion, the reaction mixture was cooled to room temperature. Followed by the addition of 1 mL of H<sub>2</sub>O into the reaction vial. The crude product was extracted three times with EtOAc (2 mL each time) from the aqueous phase. The combined organic phase was dried with anhydrous Na<sub>2</sub>SO<sub>4</sub>. Then the organic solvent was removed under vacuum and the resulting mixture was purified by preparative thin-layer chromatography by using Hexane/EtOAc (10:1) as the eluent to give 18.7 mg of arylated ketone (85% yield). The analytical data was in consistent with literature.<sup>1</sup>

## References

- (1) Hong, K.; Park, H.; Yu, J.-Q. *ACS Catal.* **2017**, *7*, 6938.
- (2) (a) Parella, R.; Gopalakrishnan, B.; Babu, S. A. *J. Org. Chem.* **2013**, *78*, 11911. (b) Zhang, F.-L.; Hong, K.; Li, T.-J.; Park, H.; Yu, J.-Q. *Science* **2016**, *351*, 252.

## <sup>1</sup>H and <sup>13</sup>C NMR Spectra

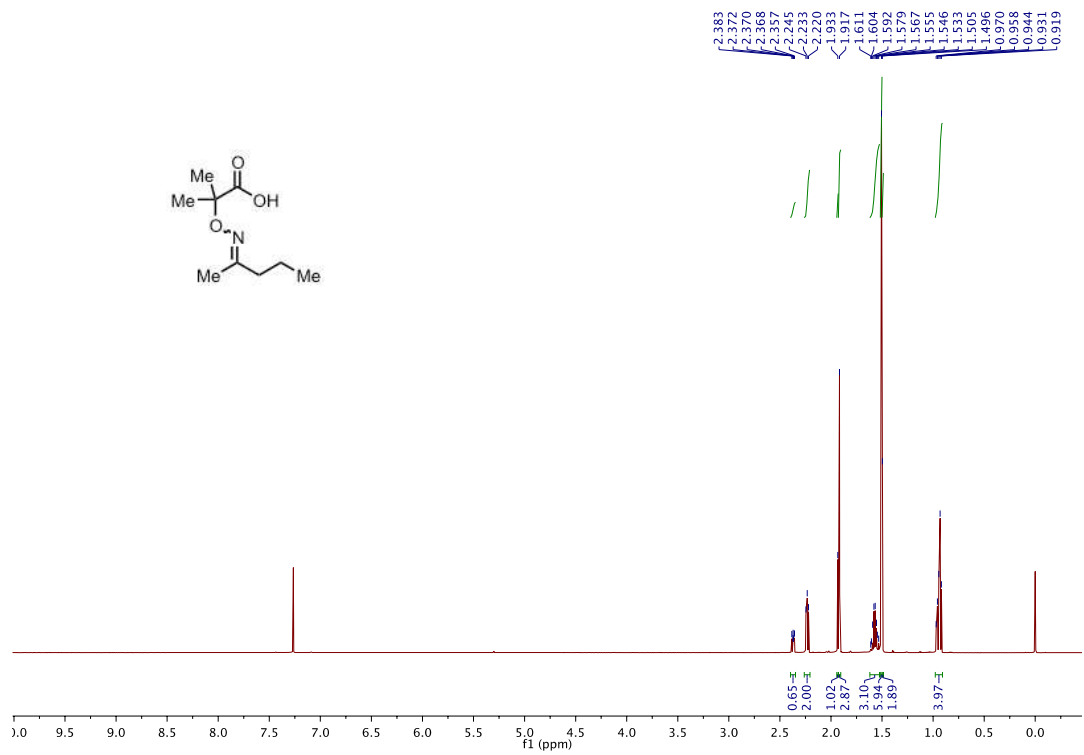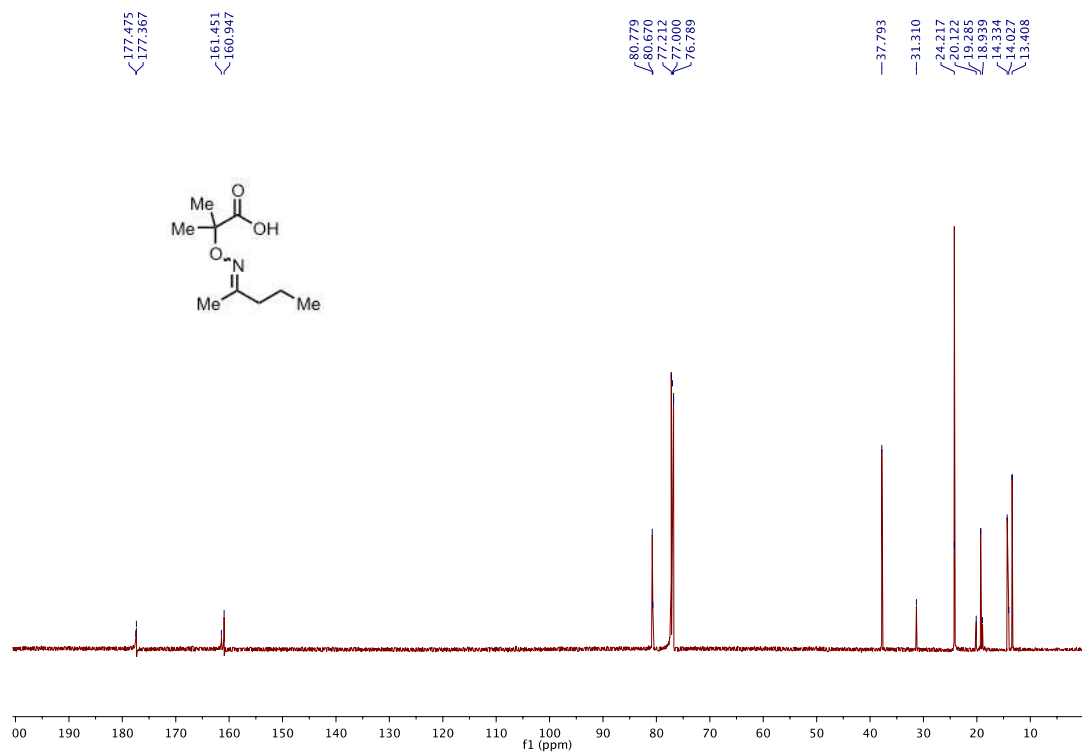

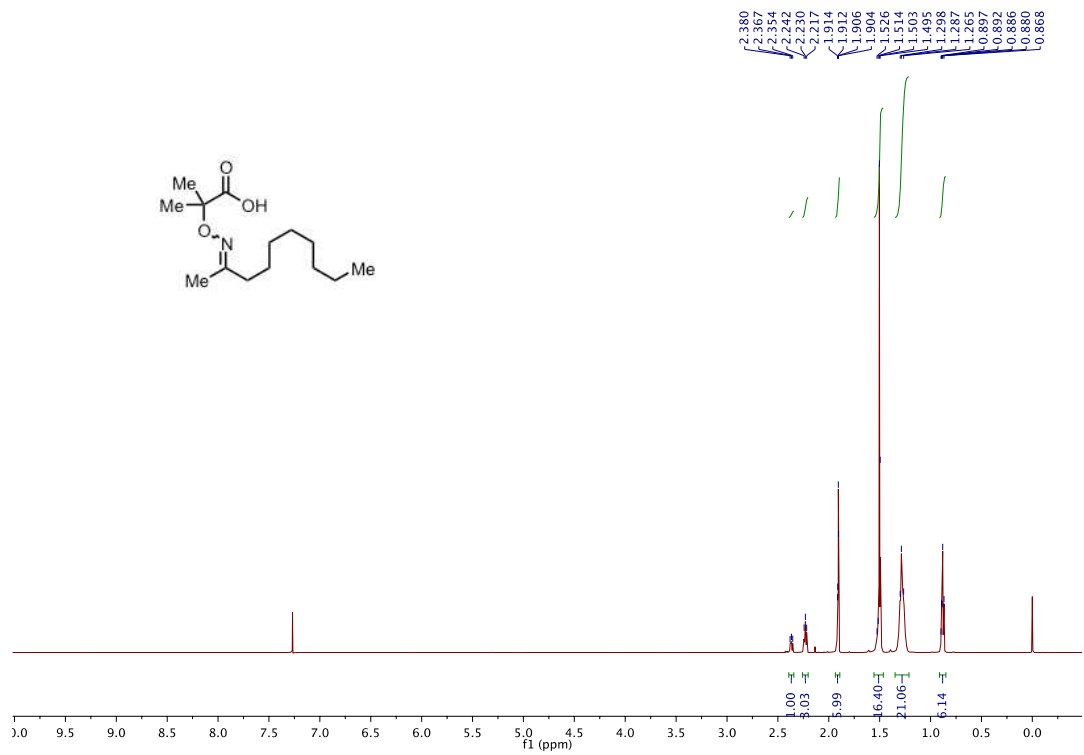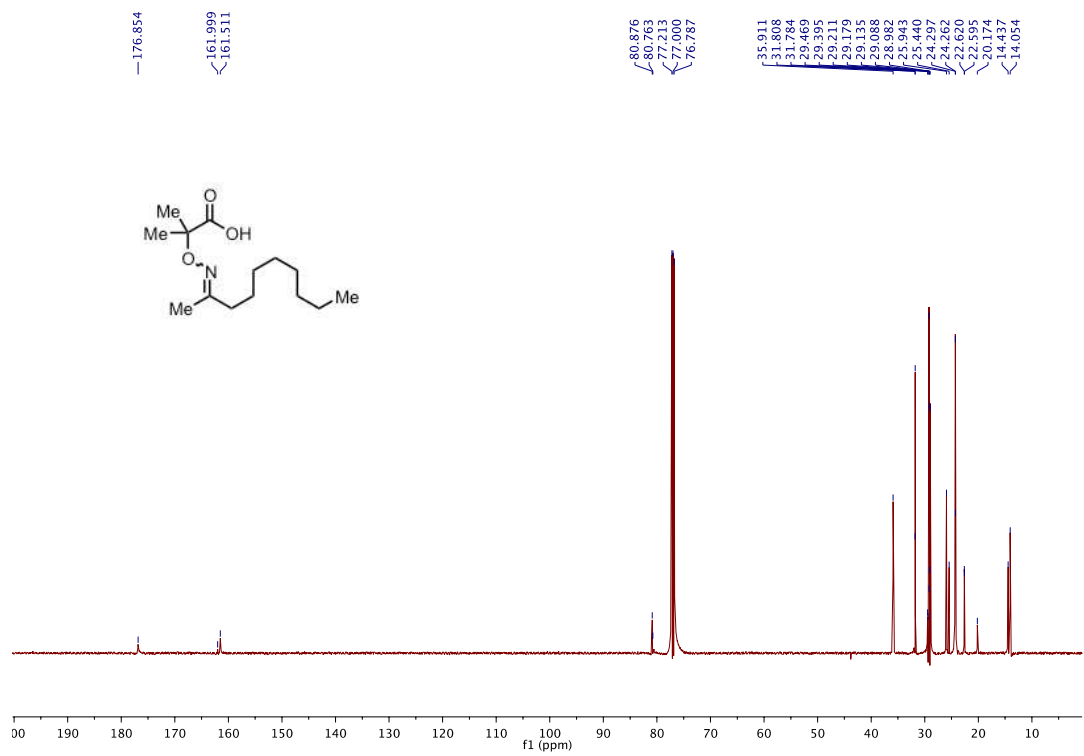

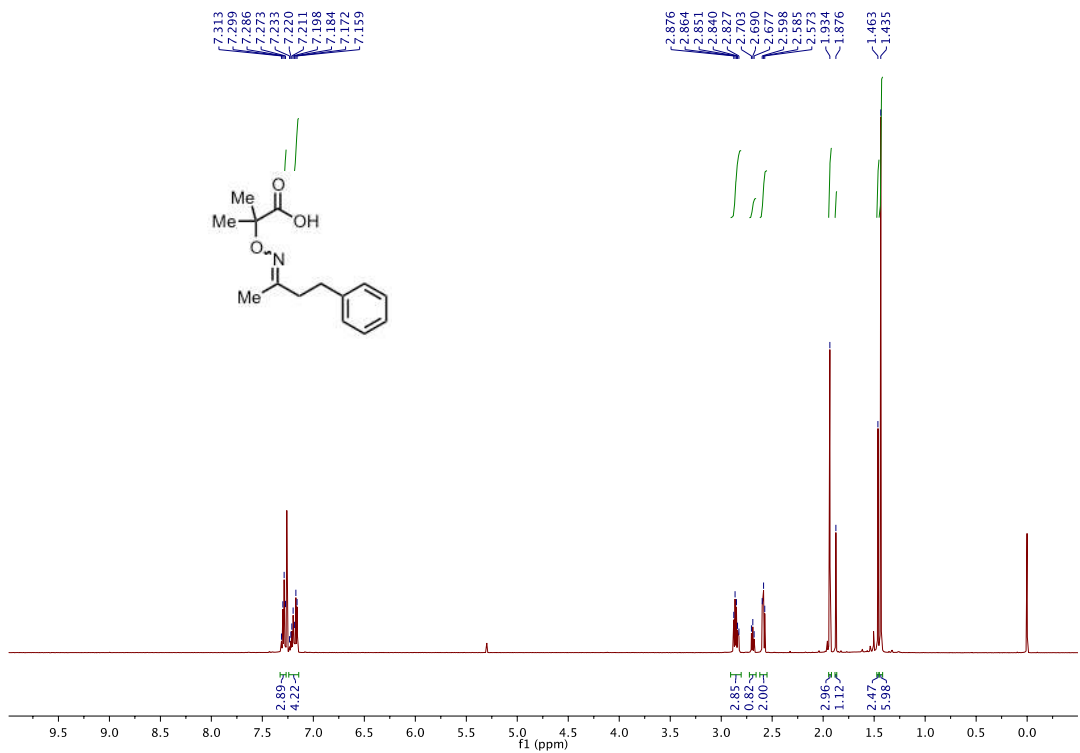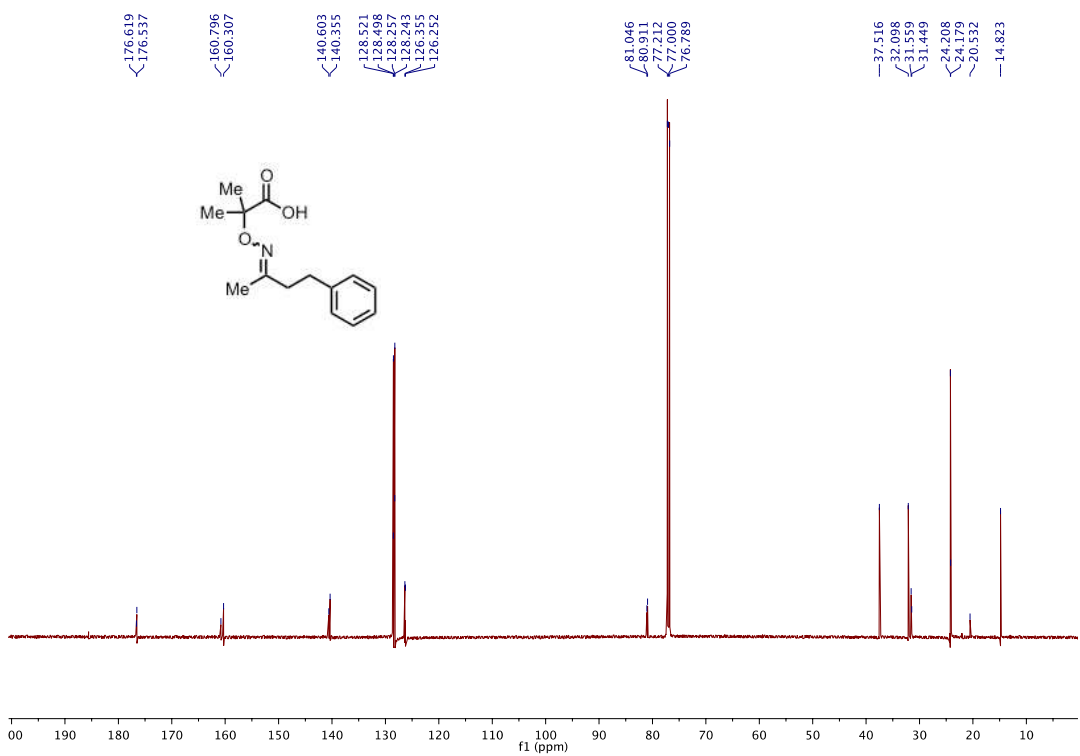

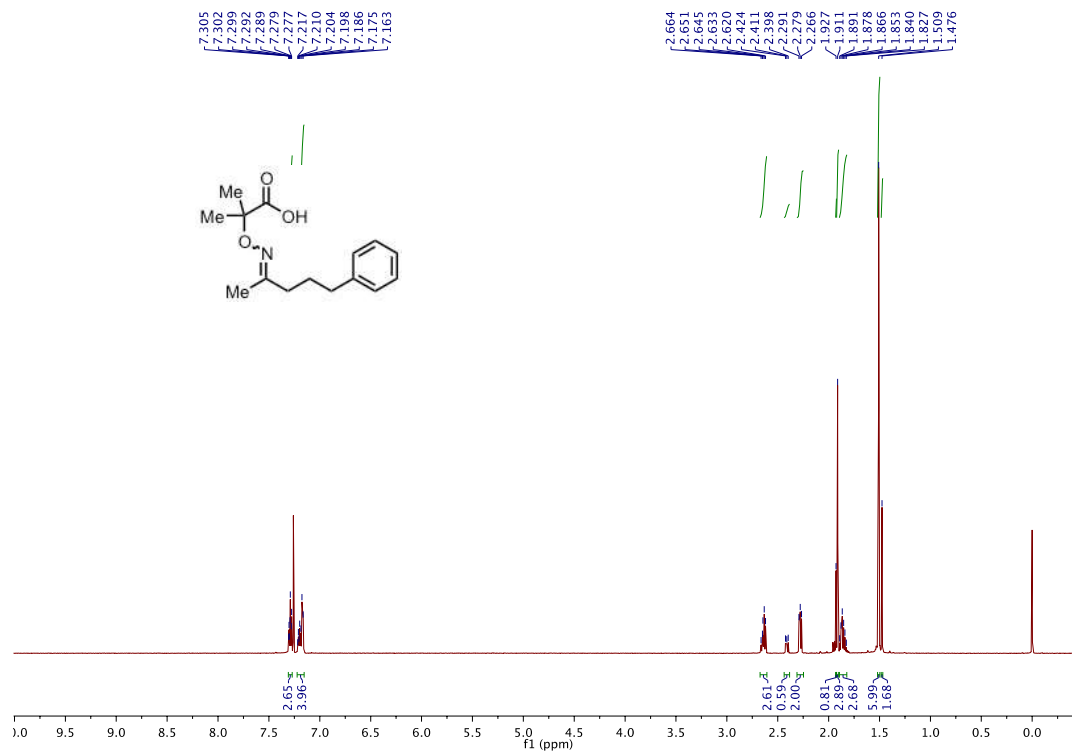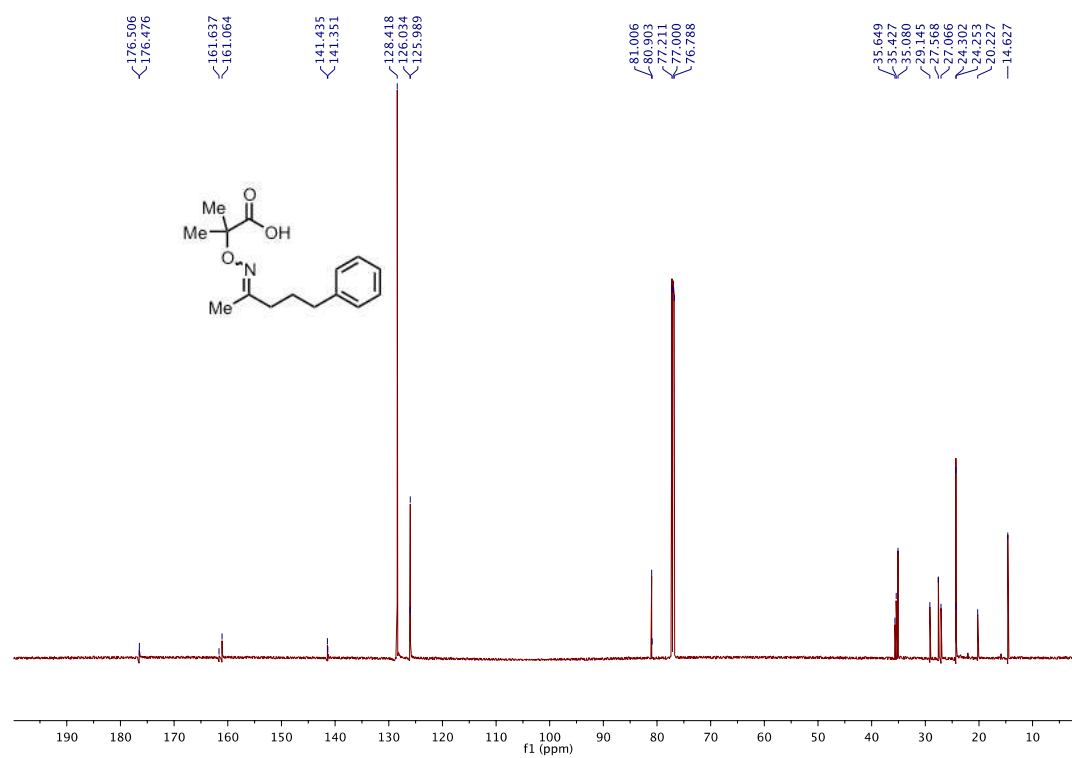



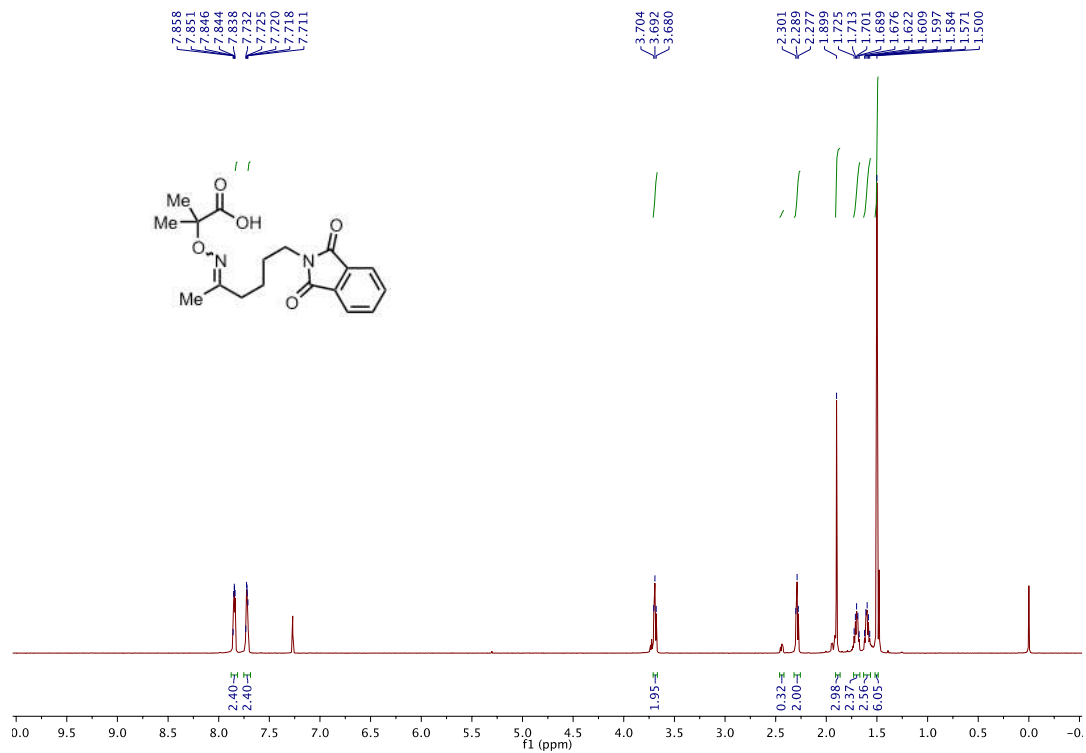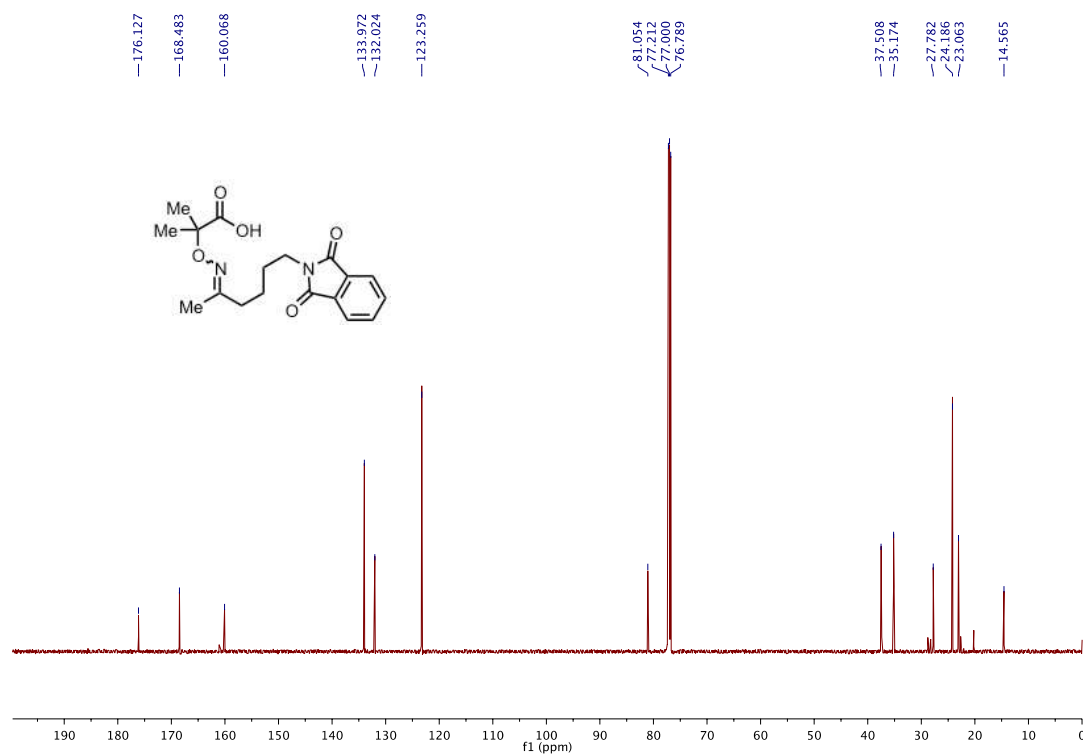

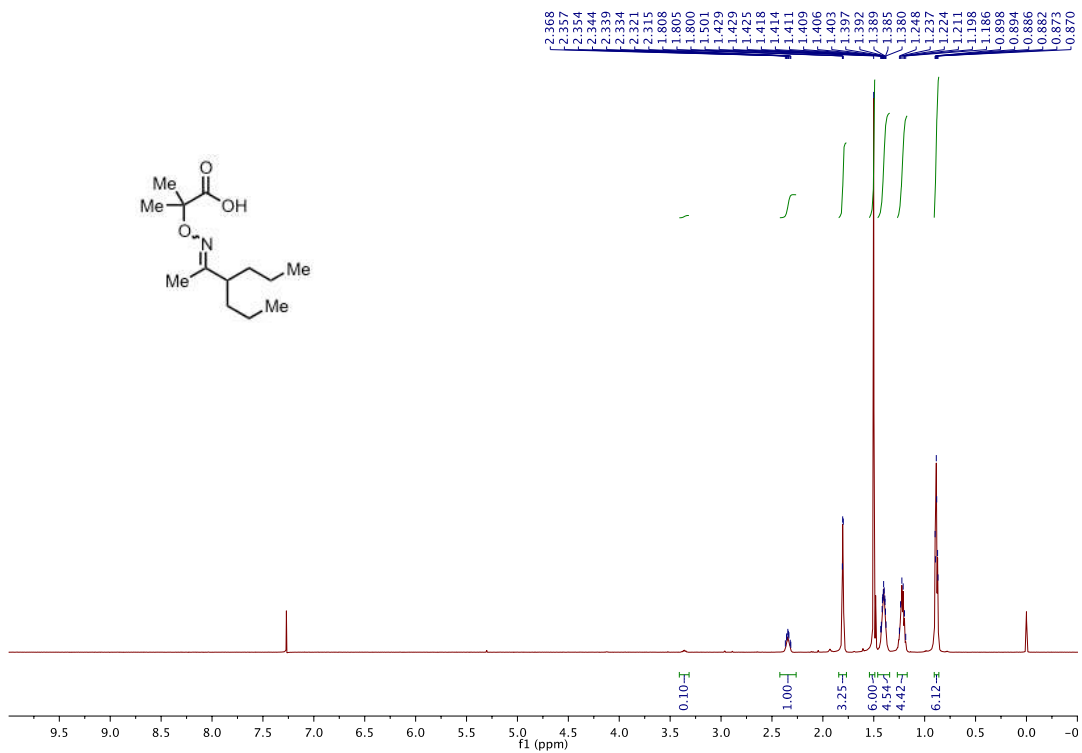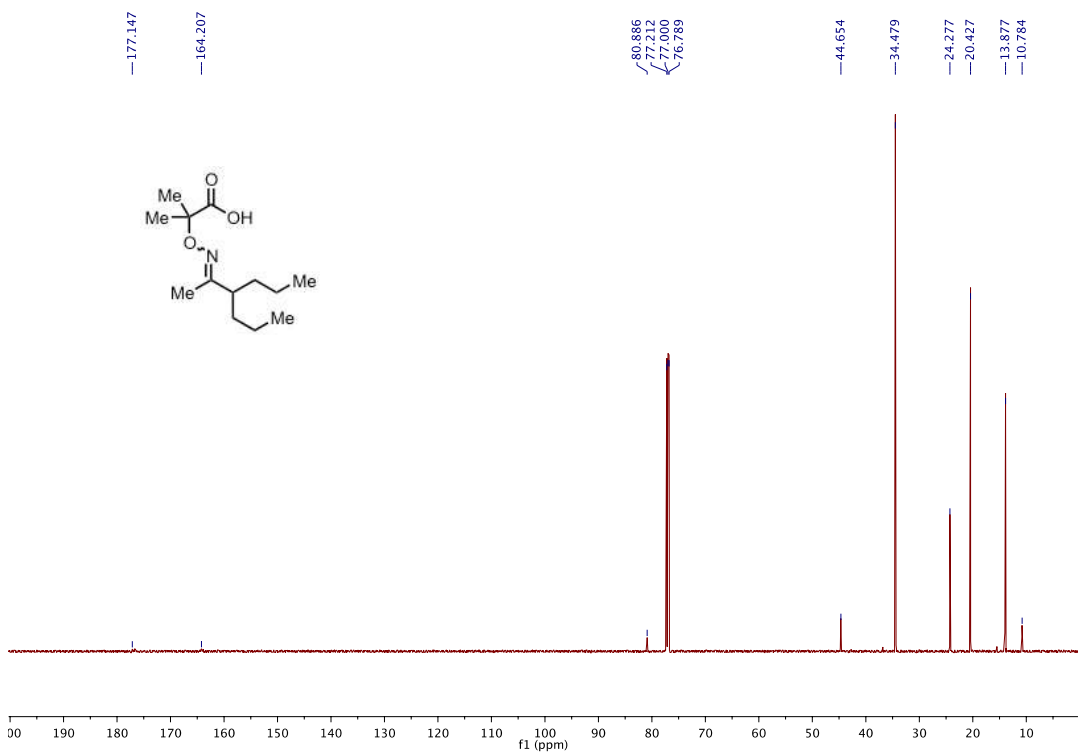

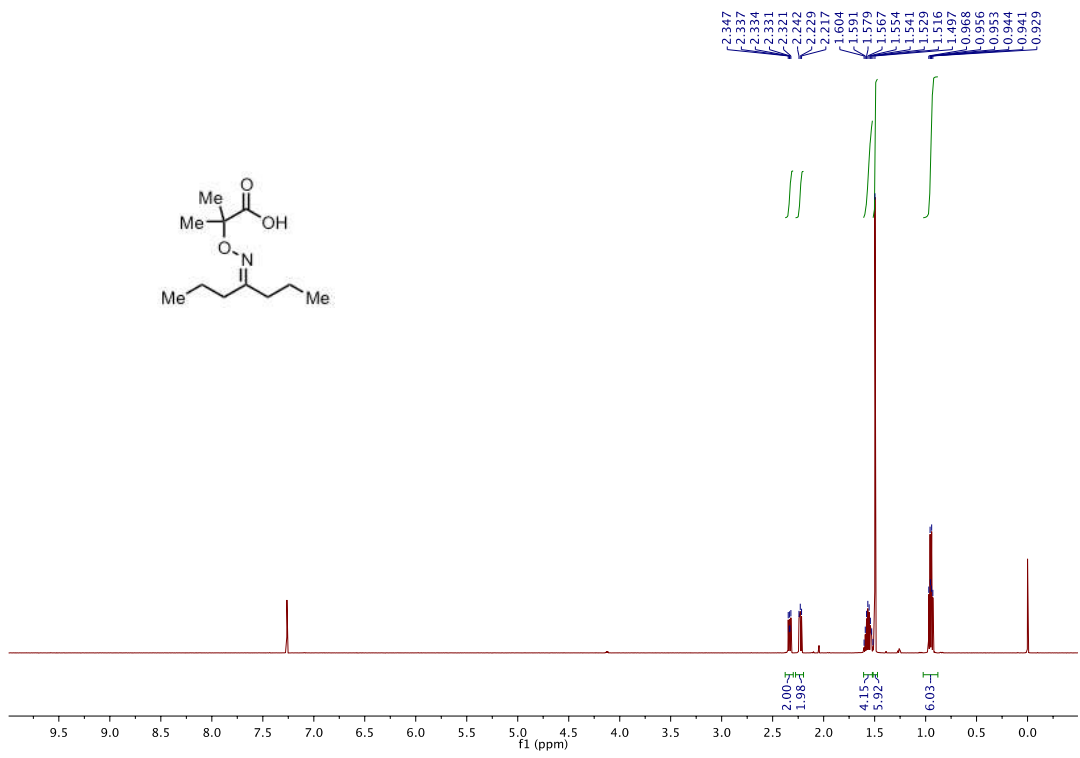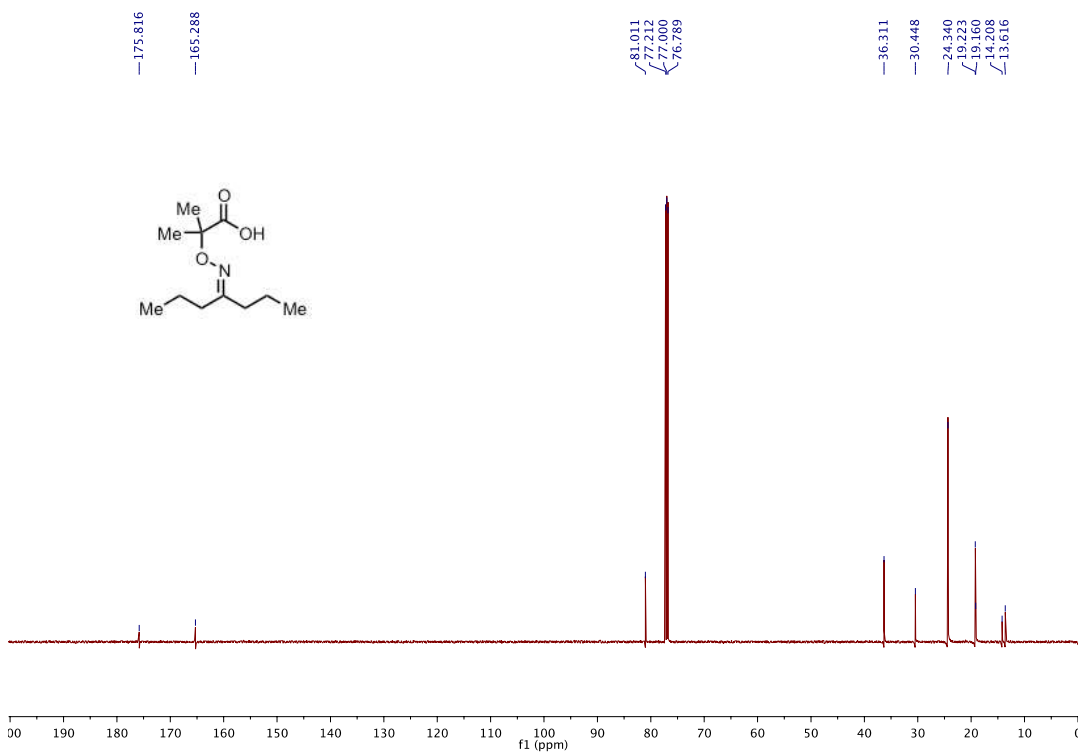

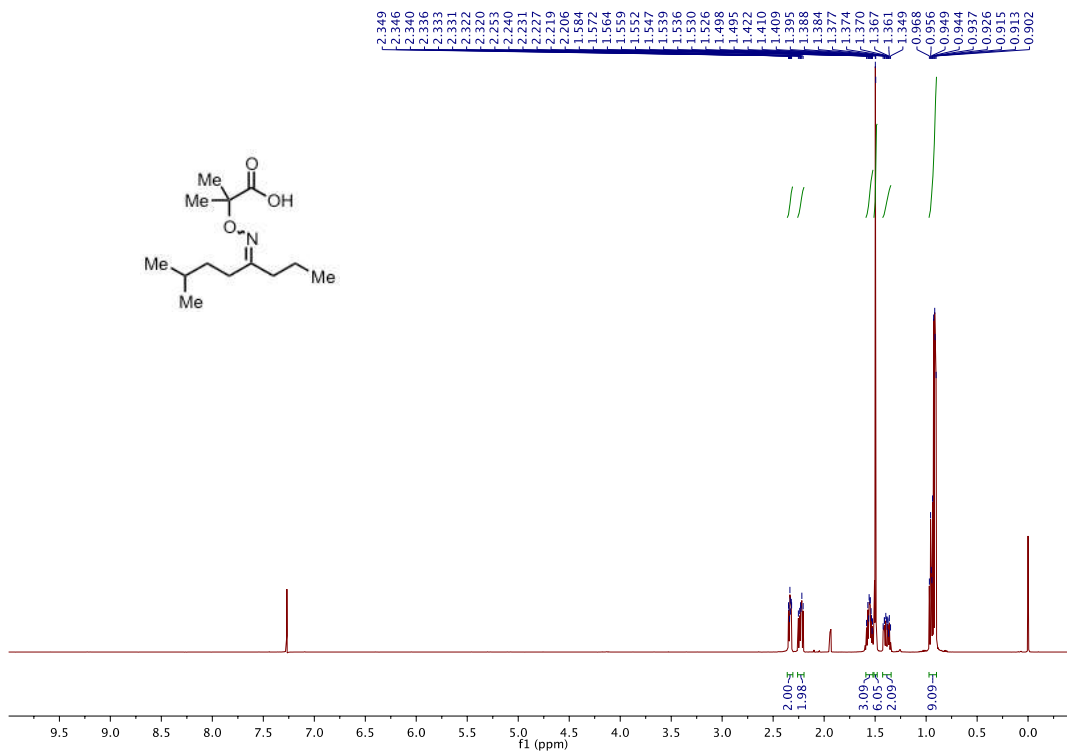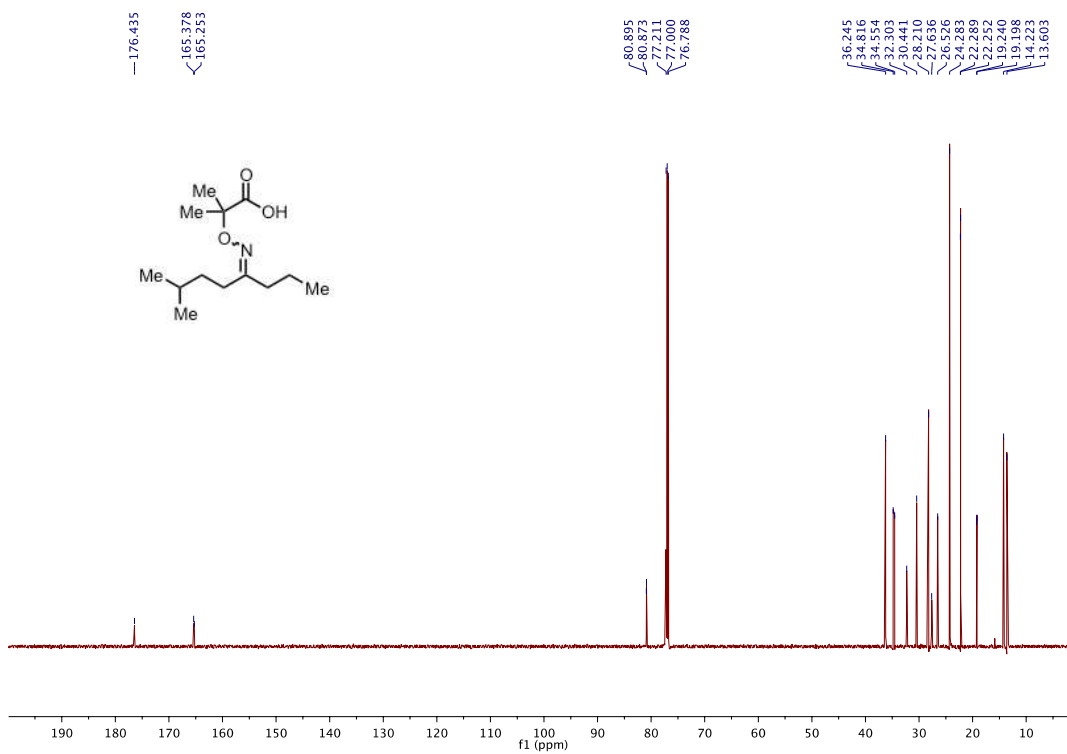

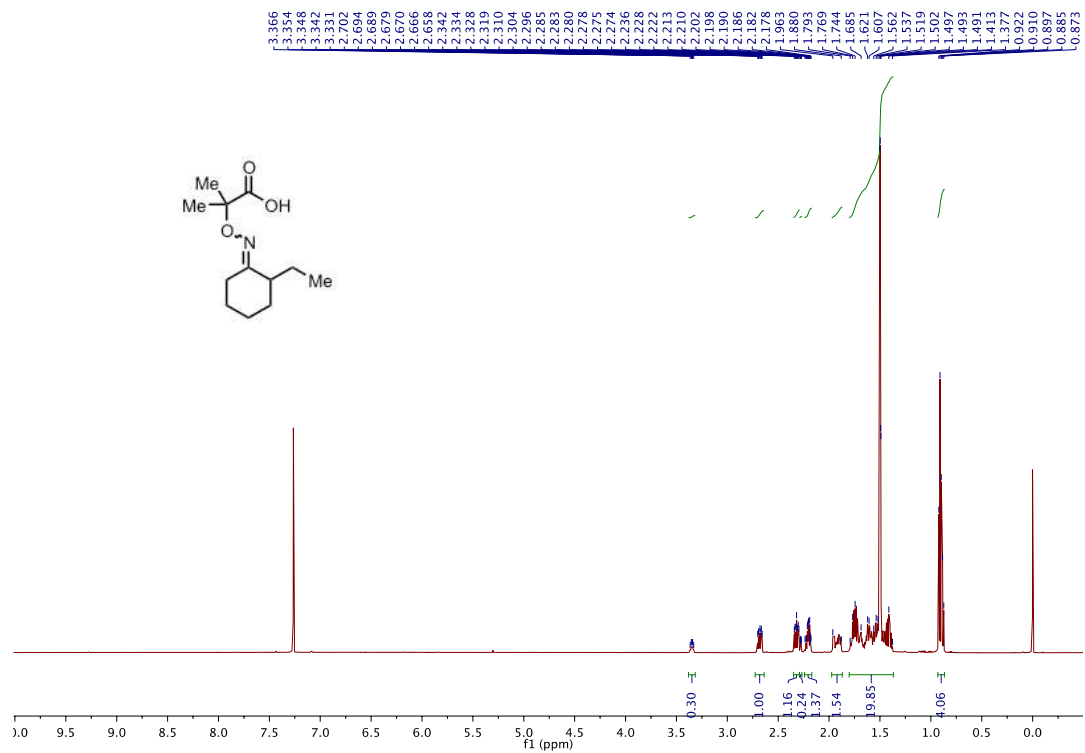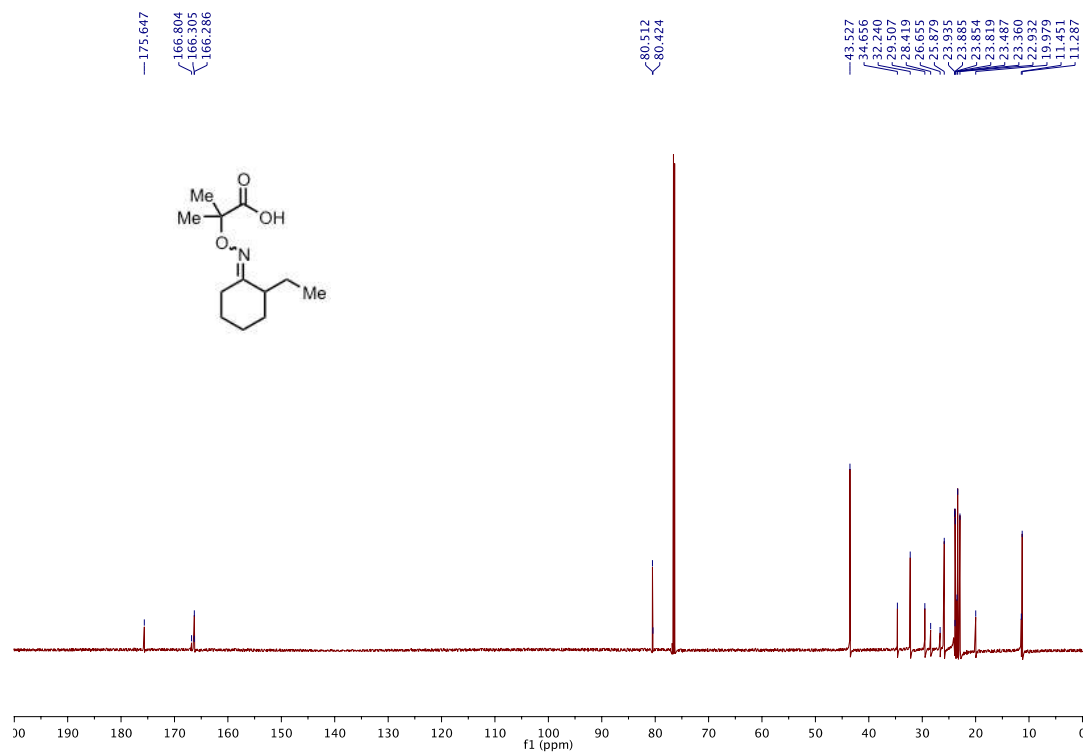

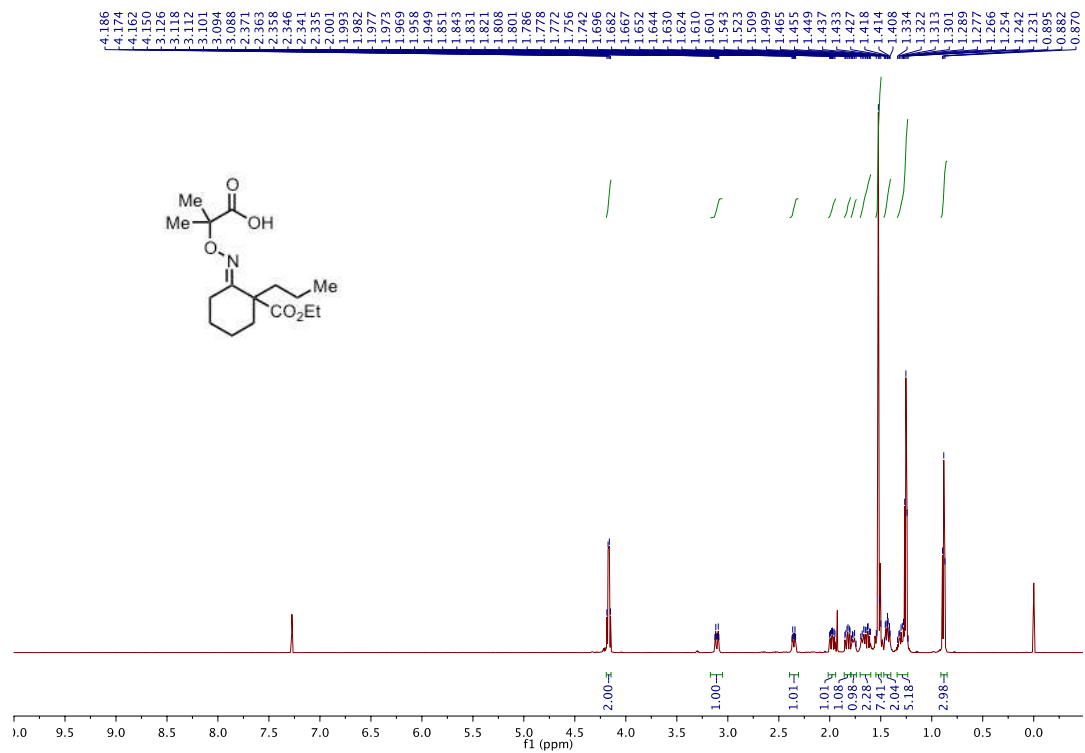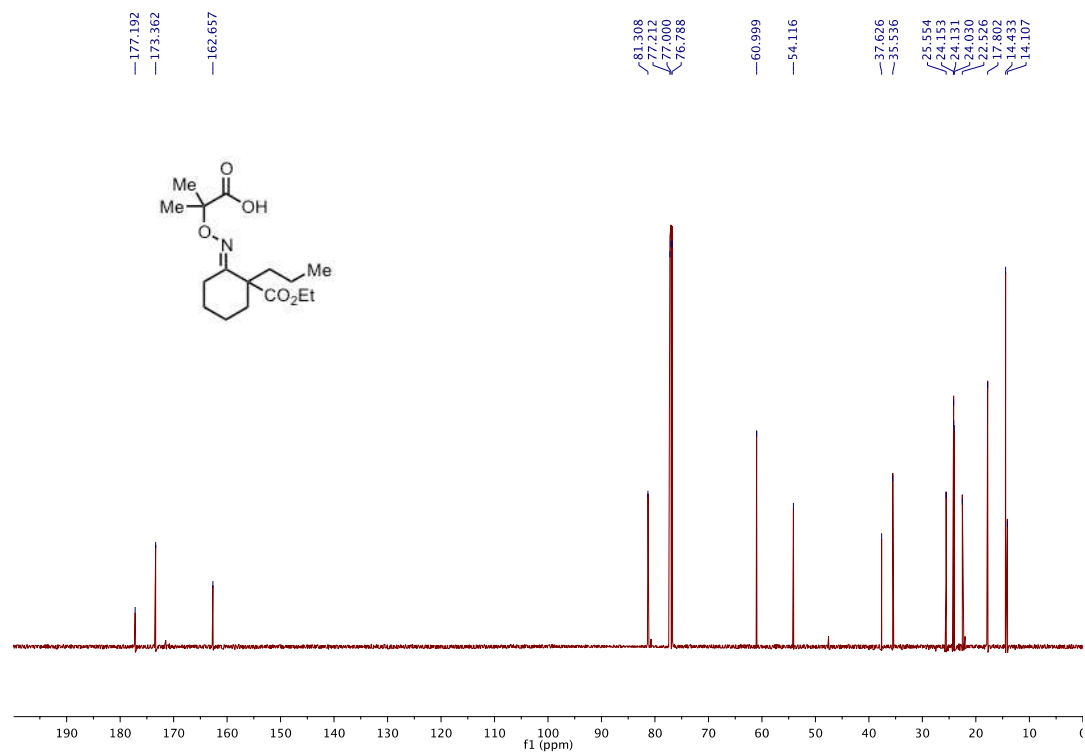

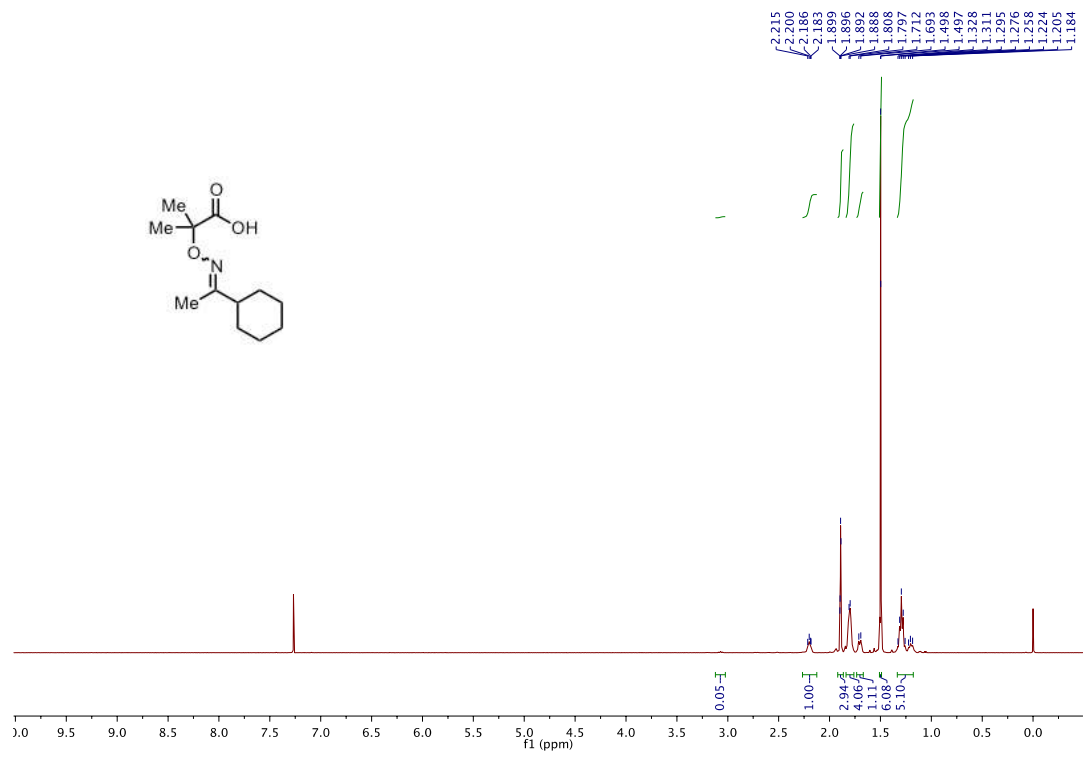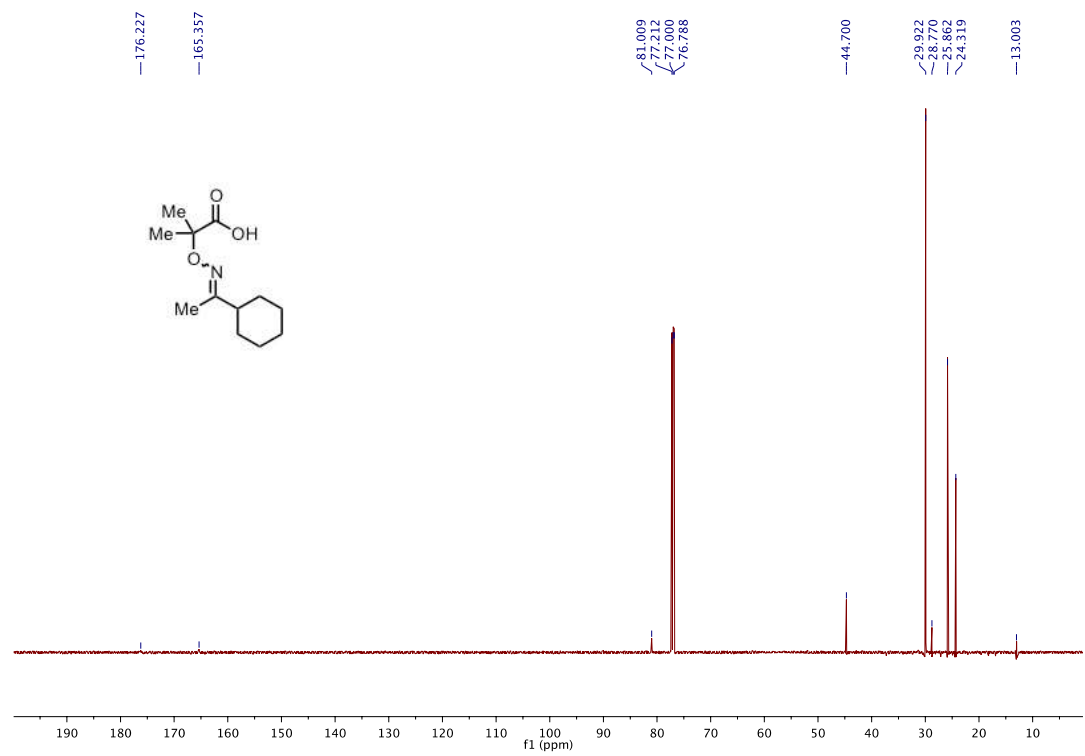

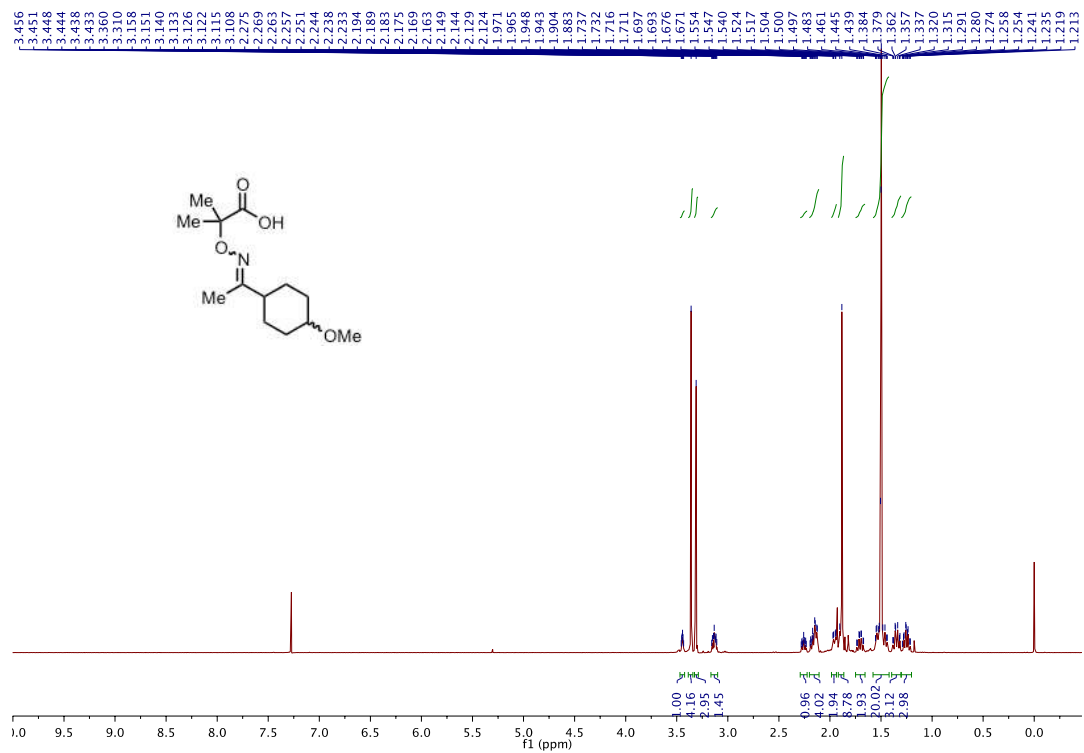

176.661  
176.544

164.208  
163.380

80.967  
80.933  
78.748  
77.212  
77.000  
76.788  
74.545

55.677  
55.579

43.810  
43.537

31.172  
29.886  
28.259  
24.208  
23.949

13.066  
12.584

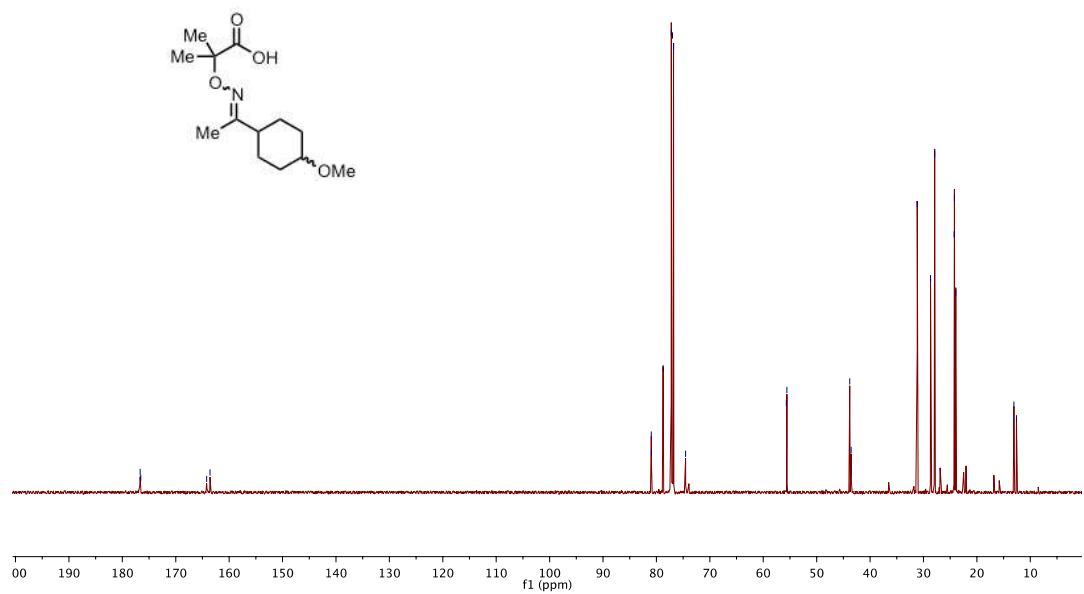



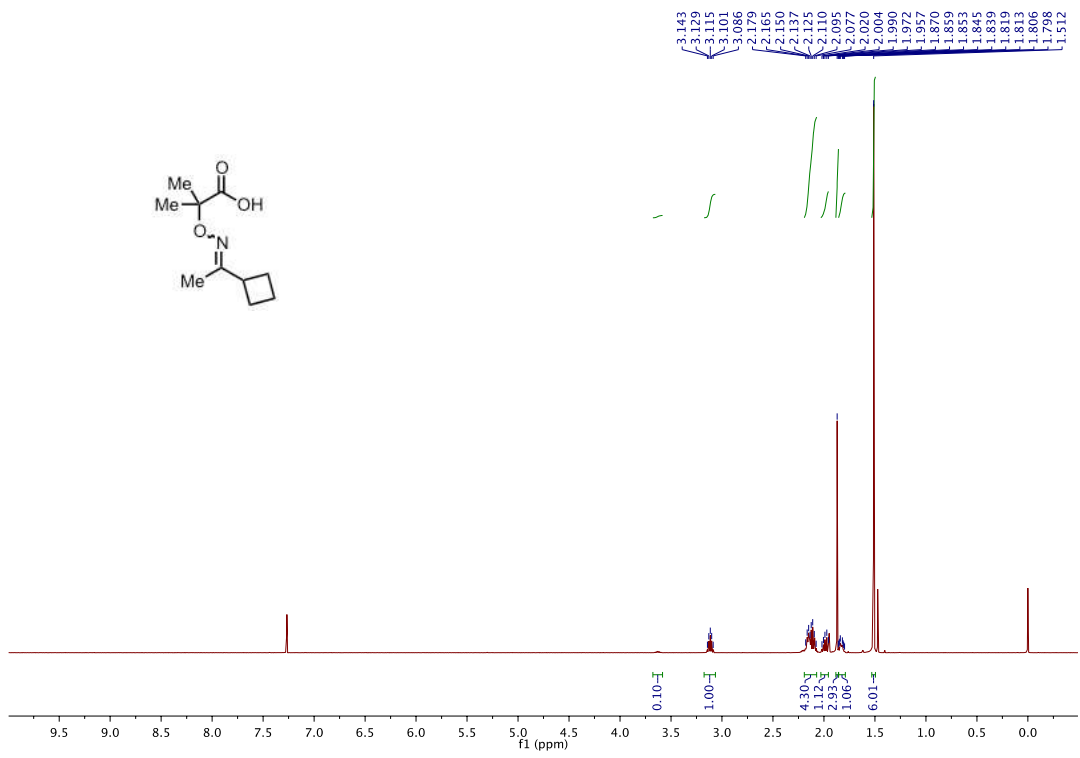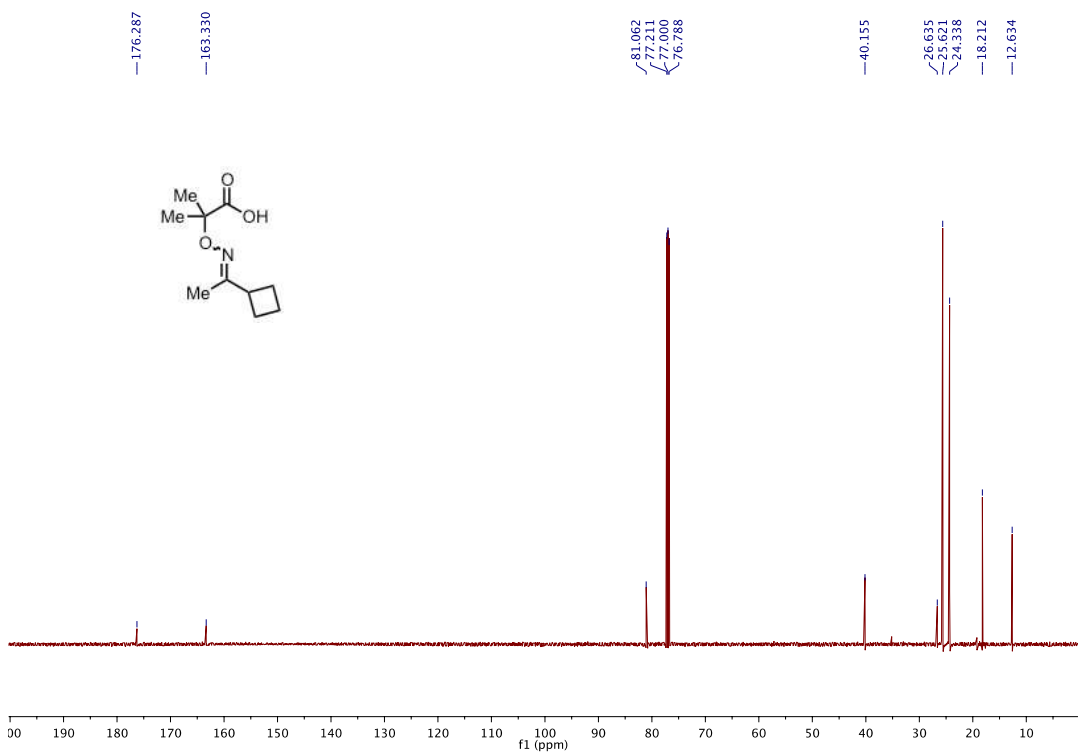

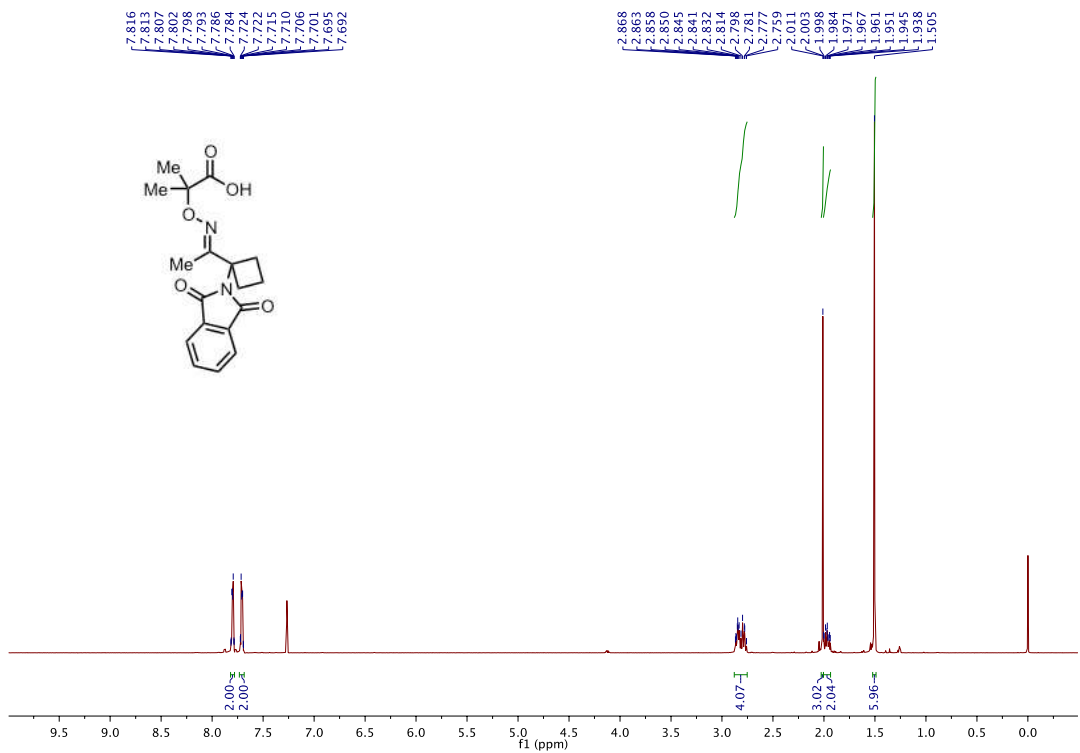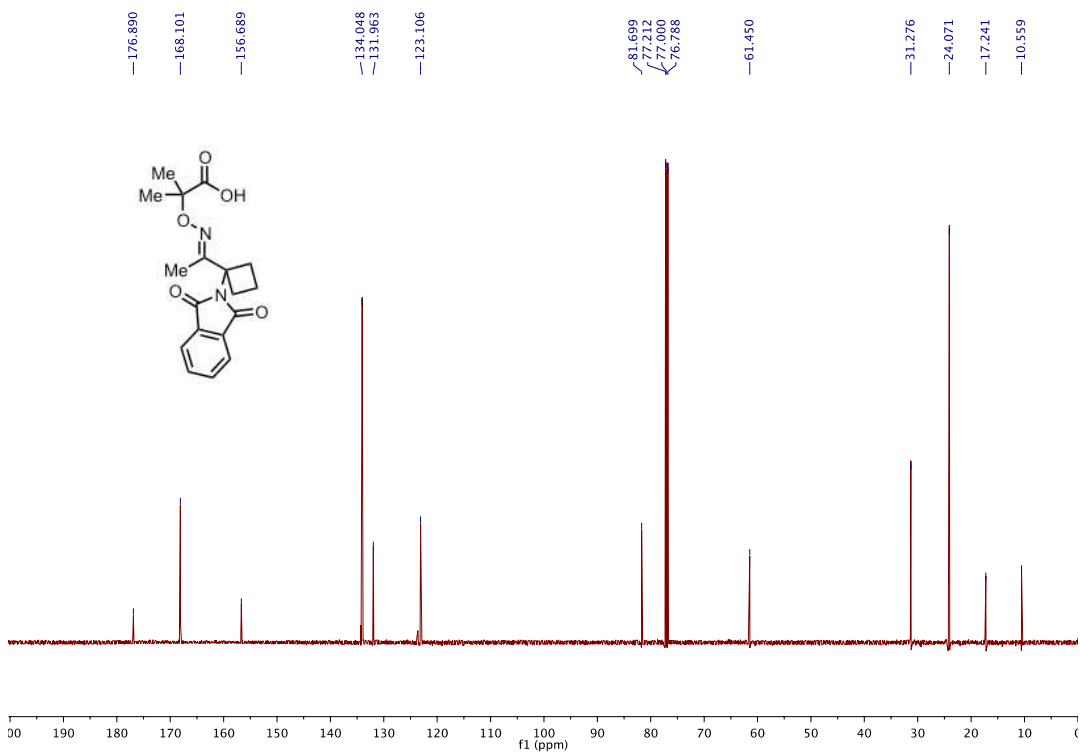

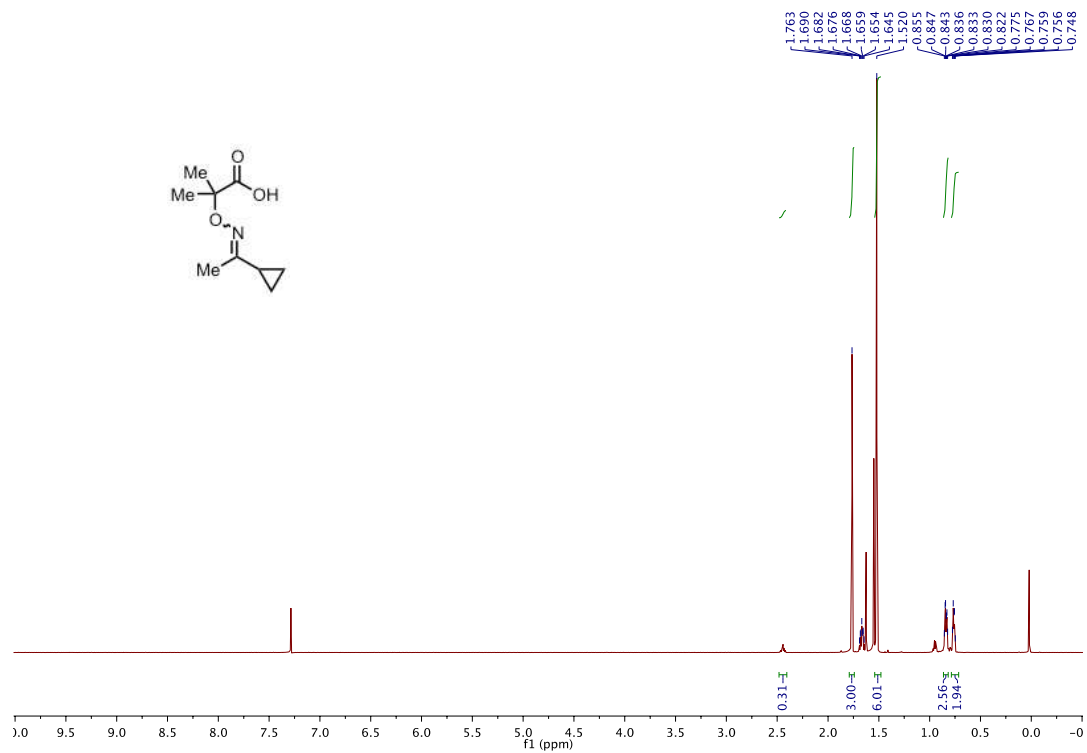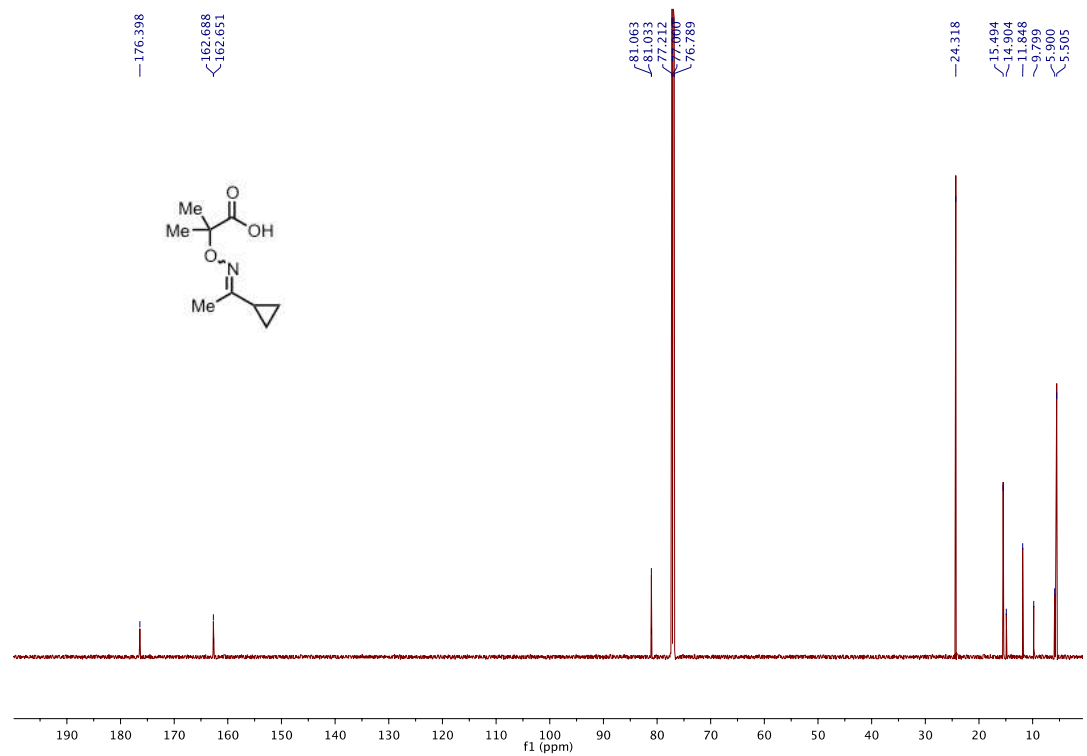

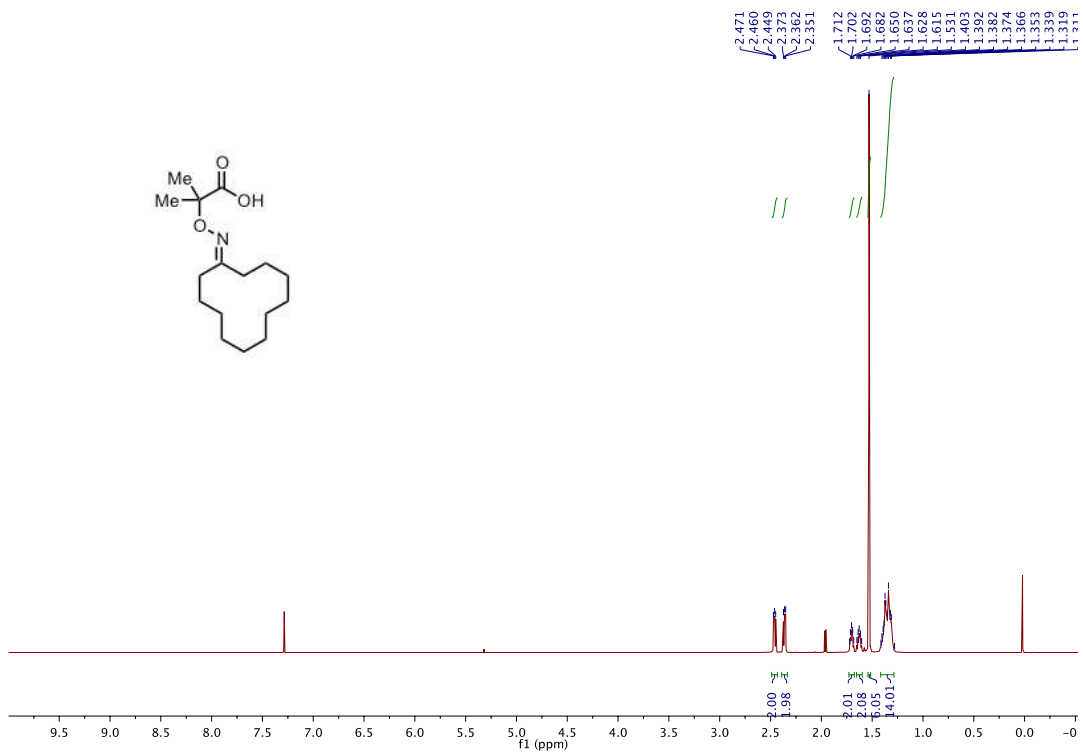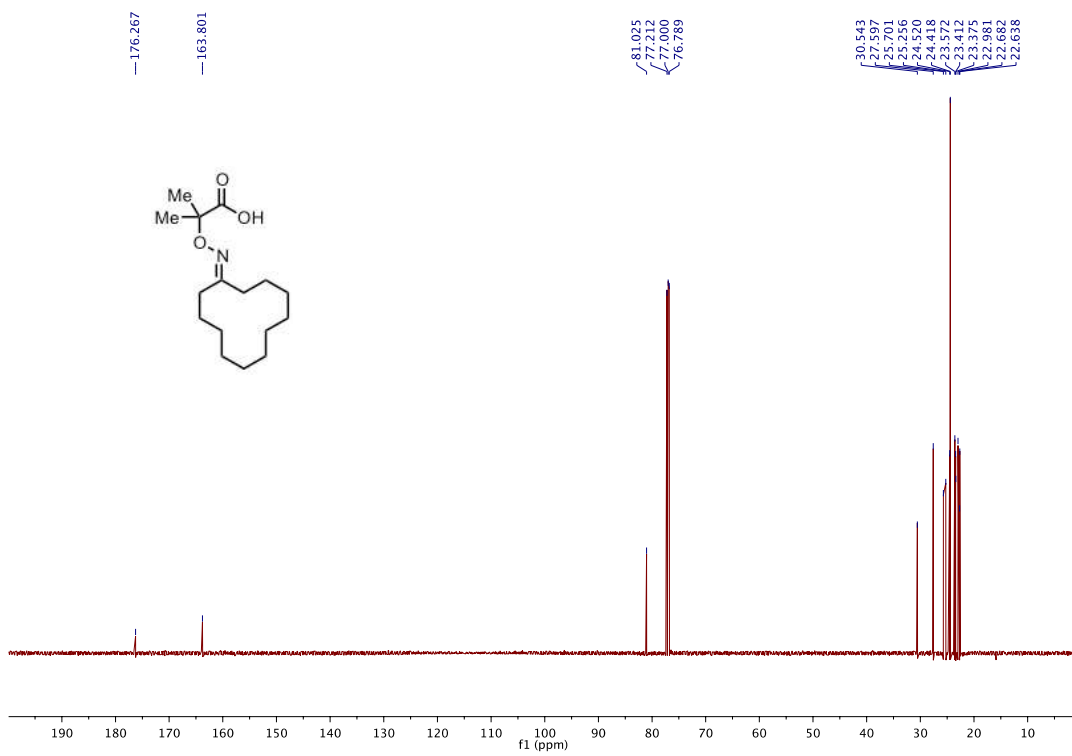

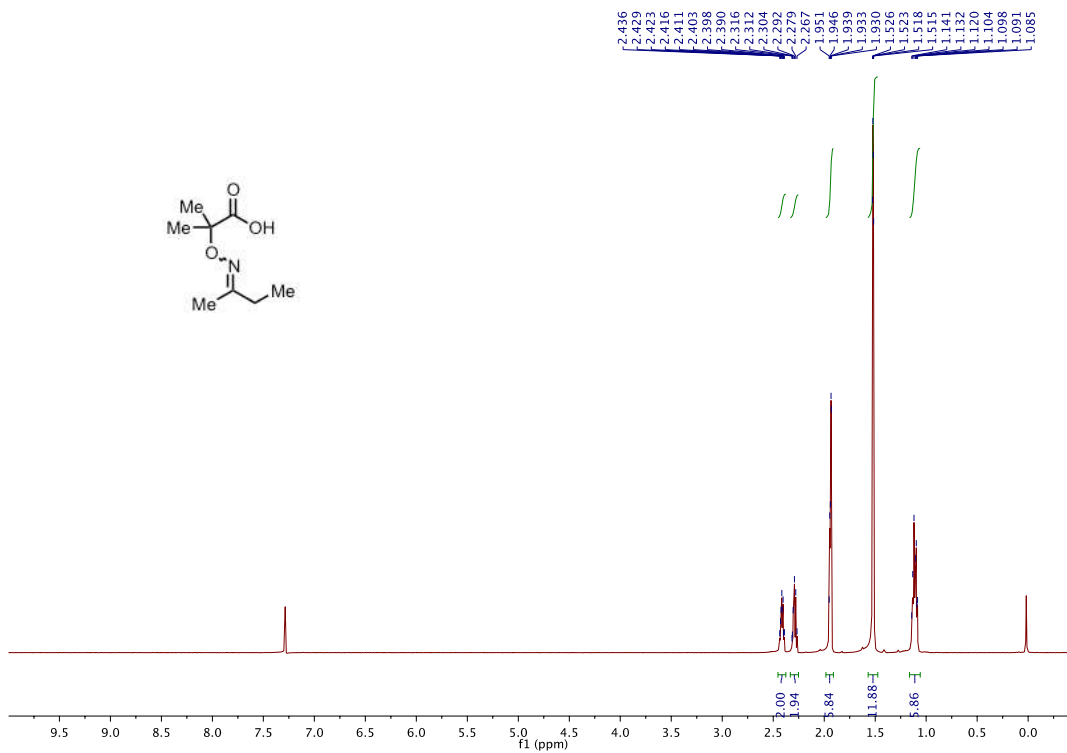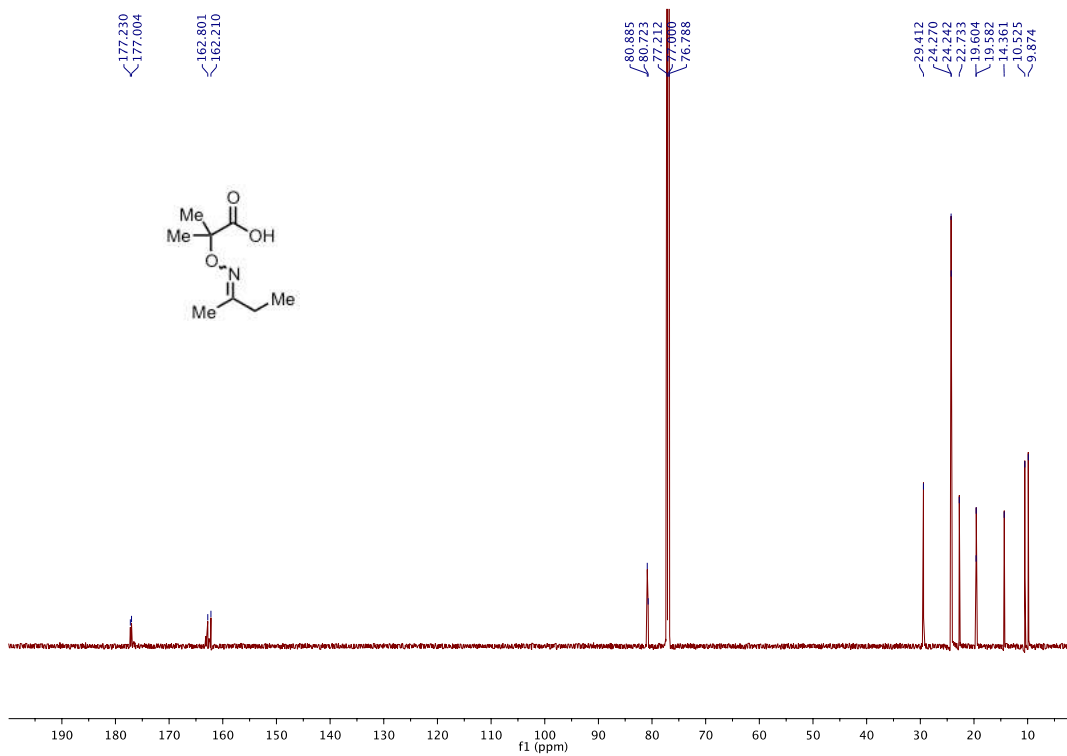

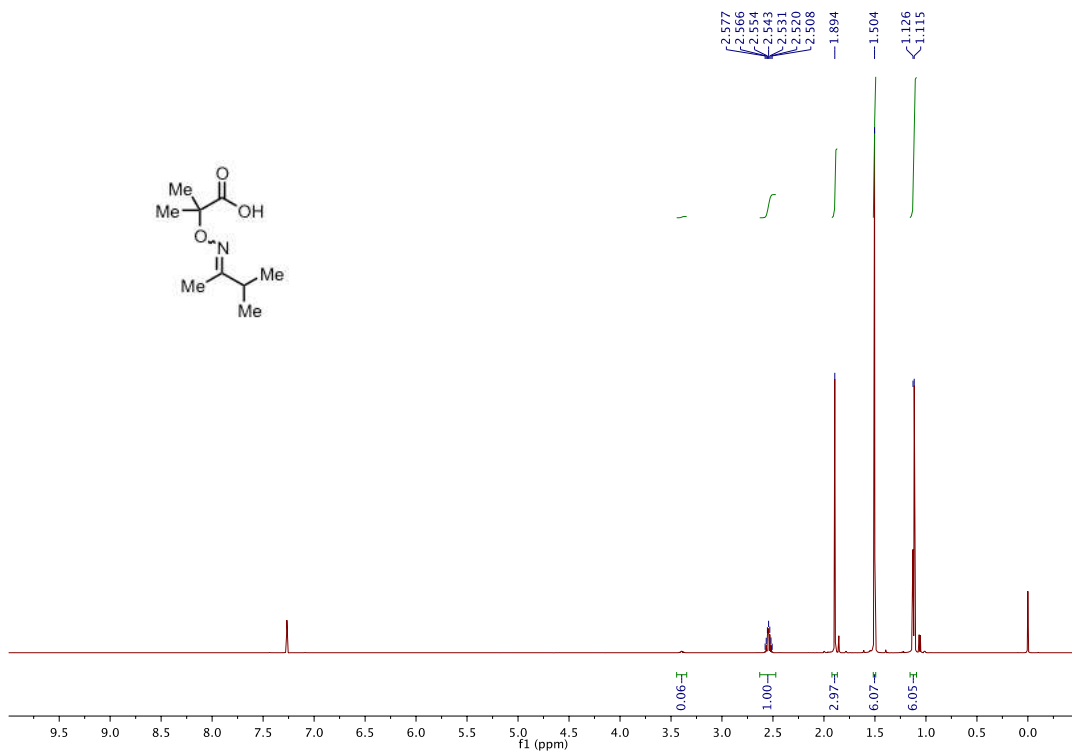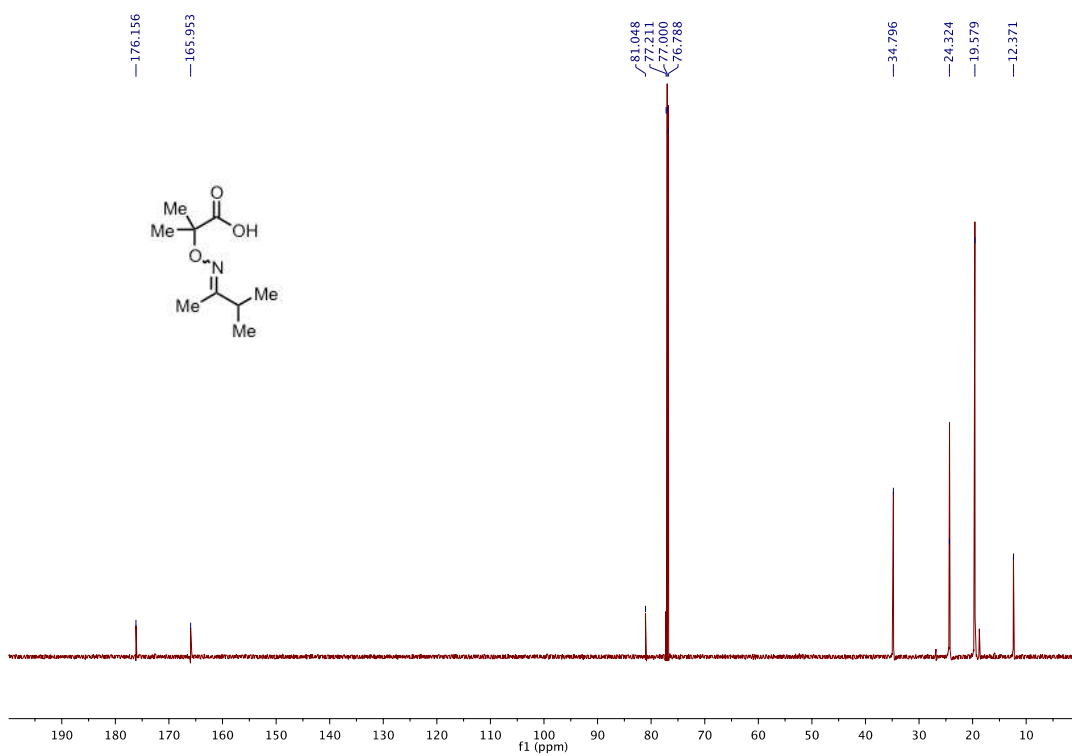

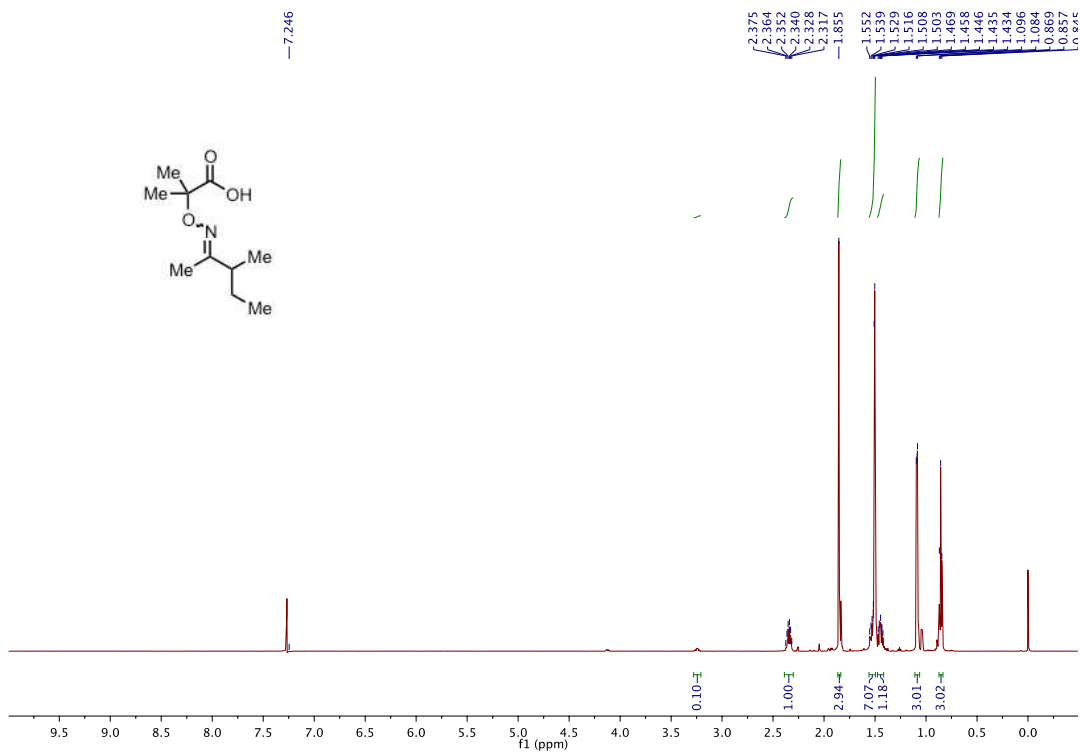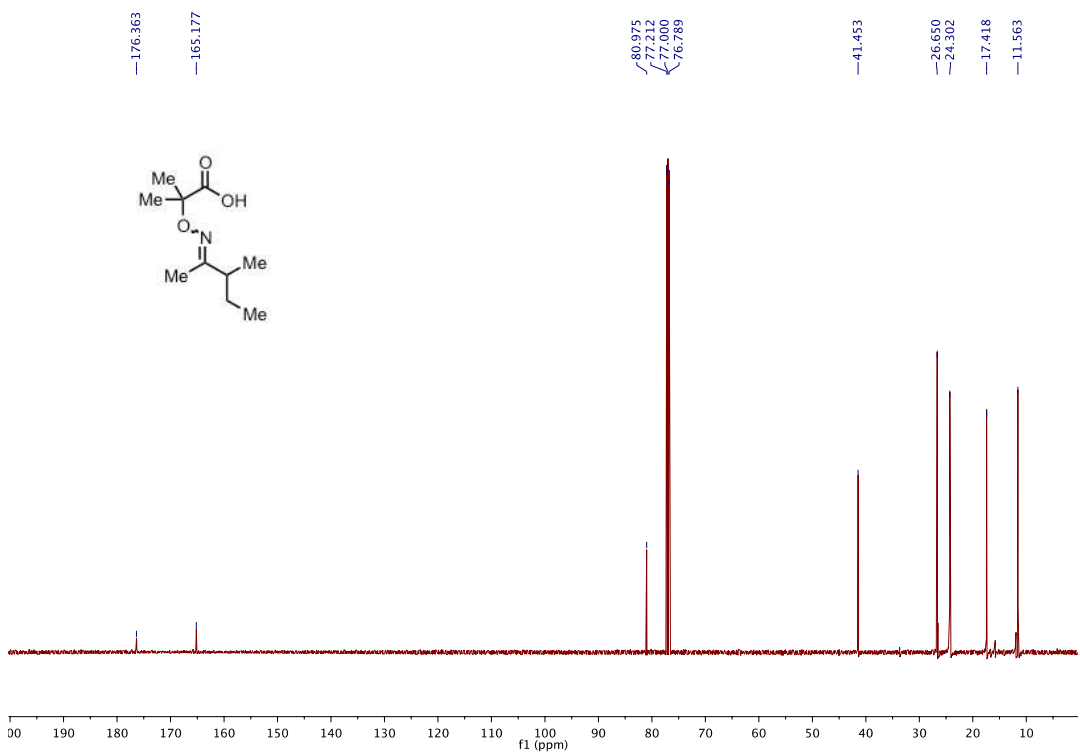

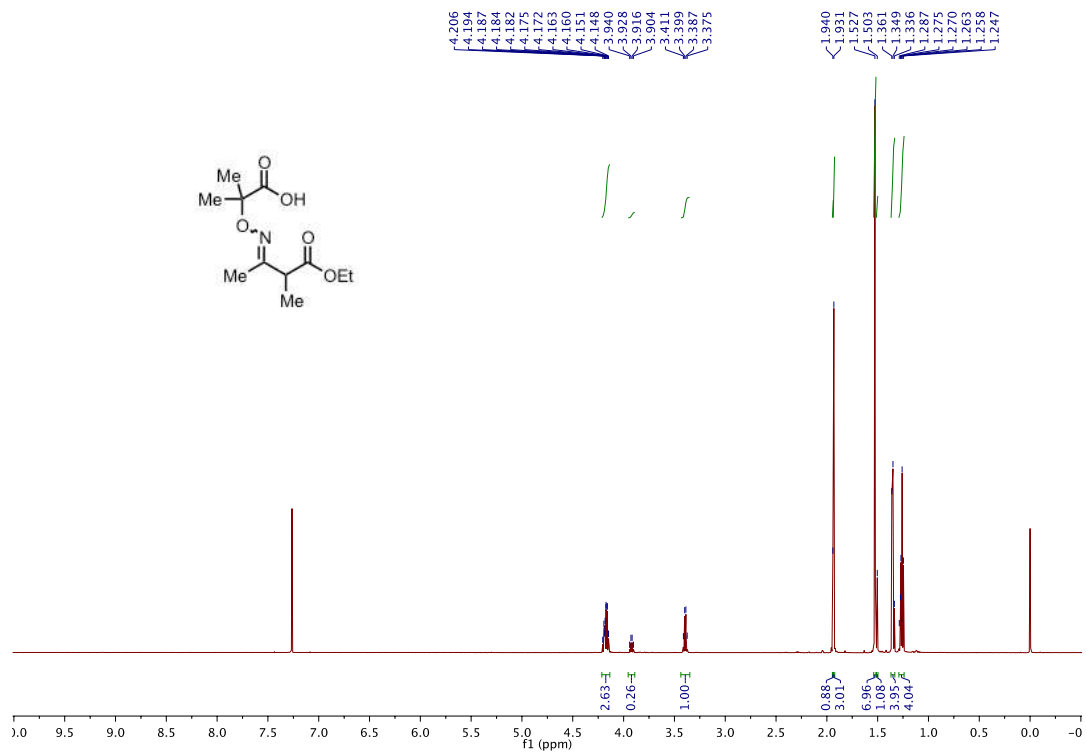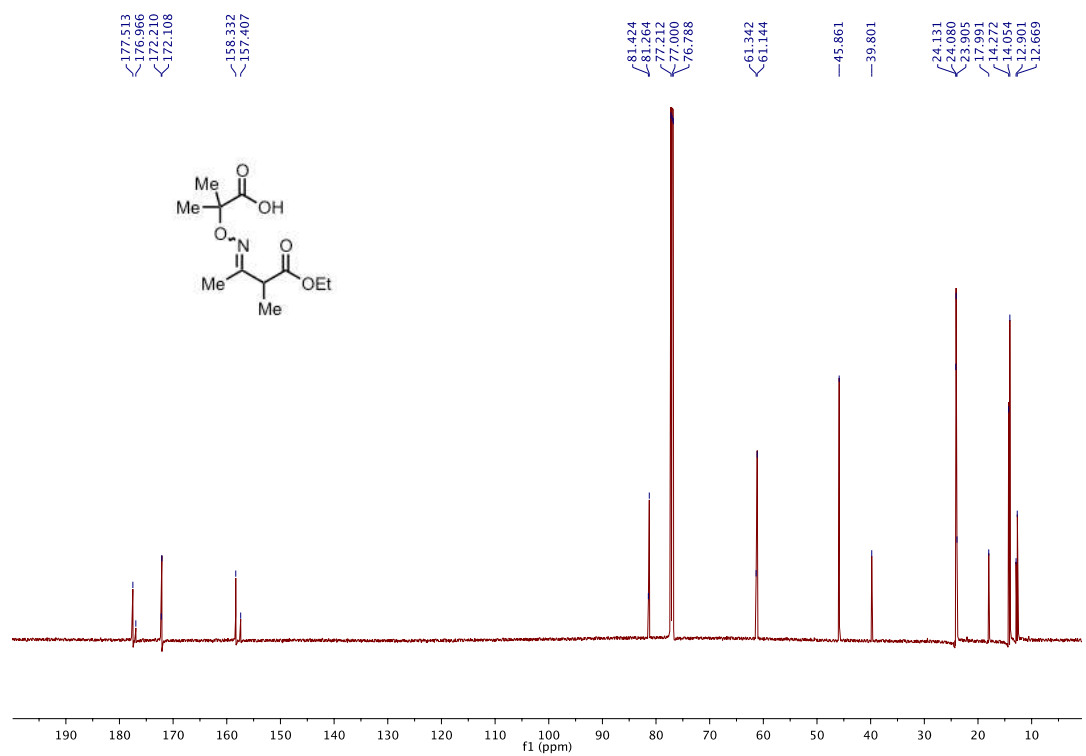



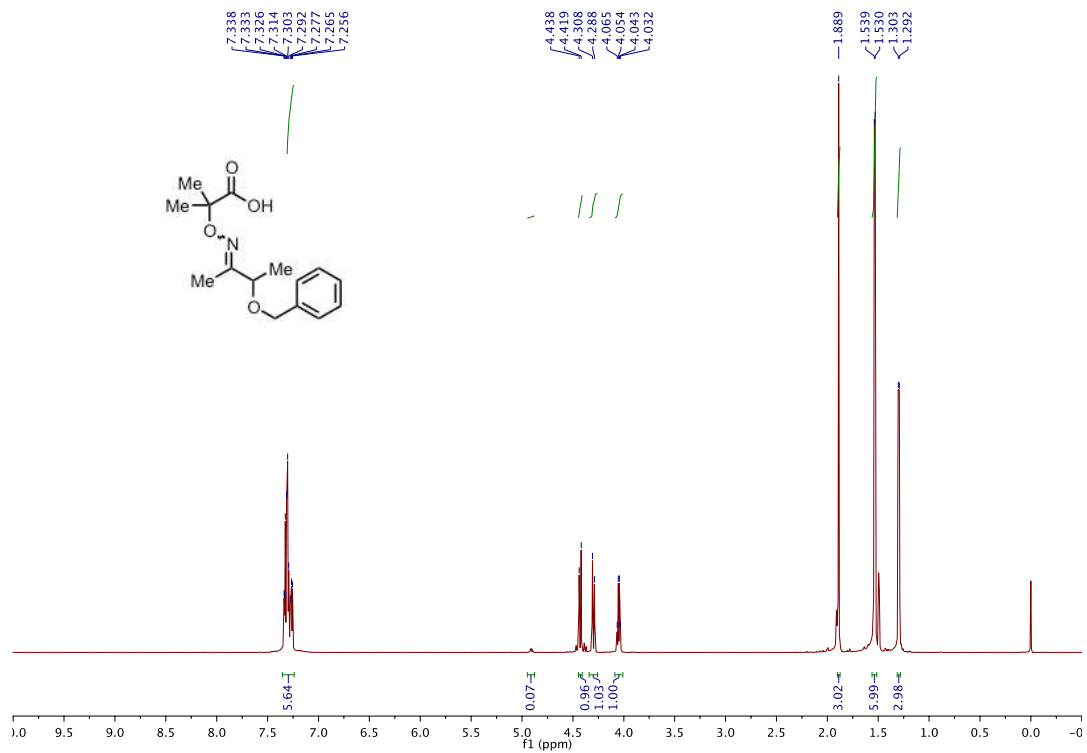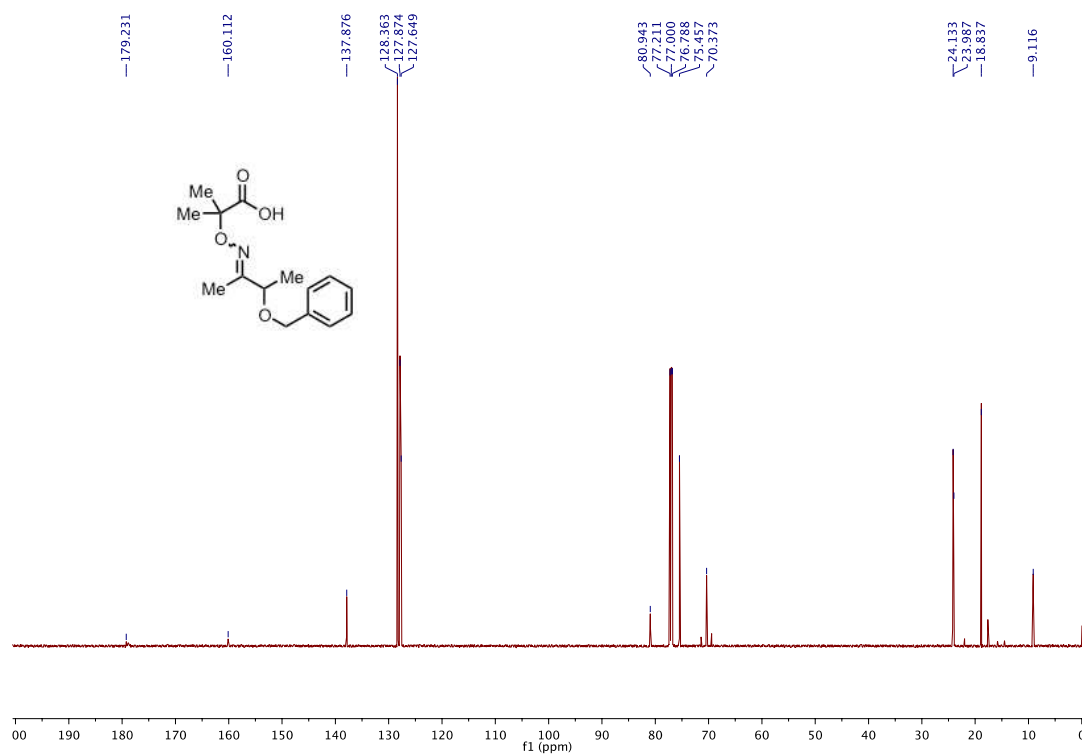

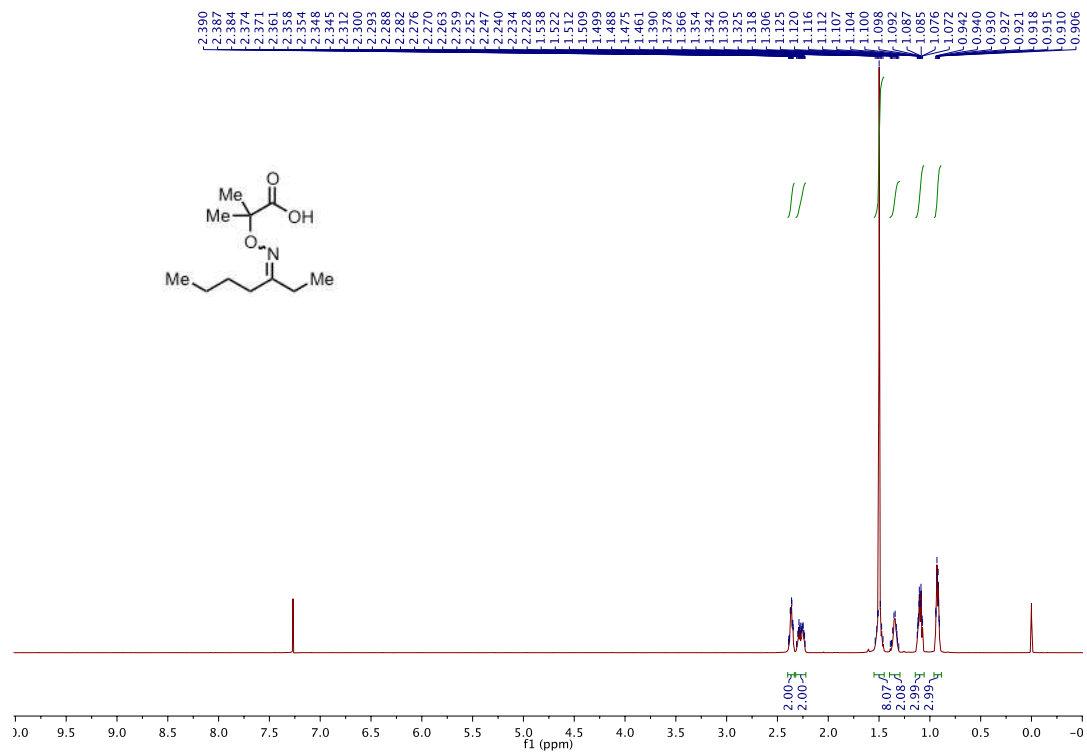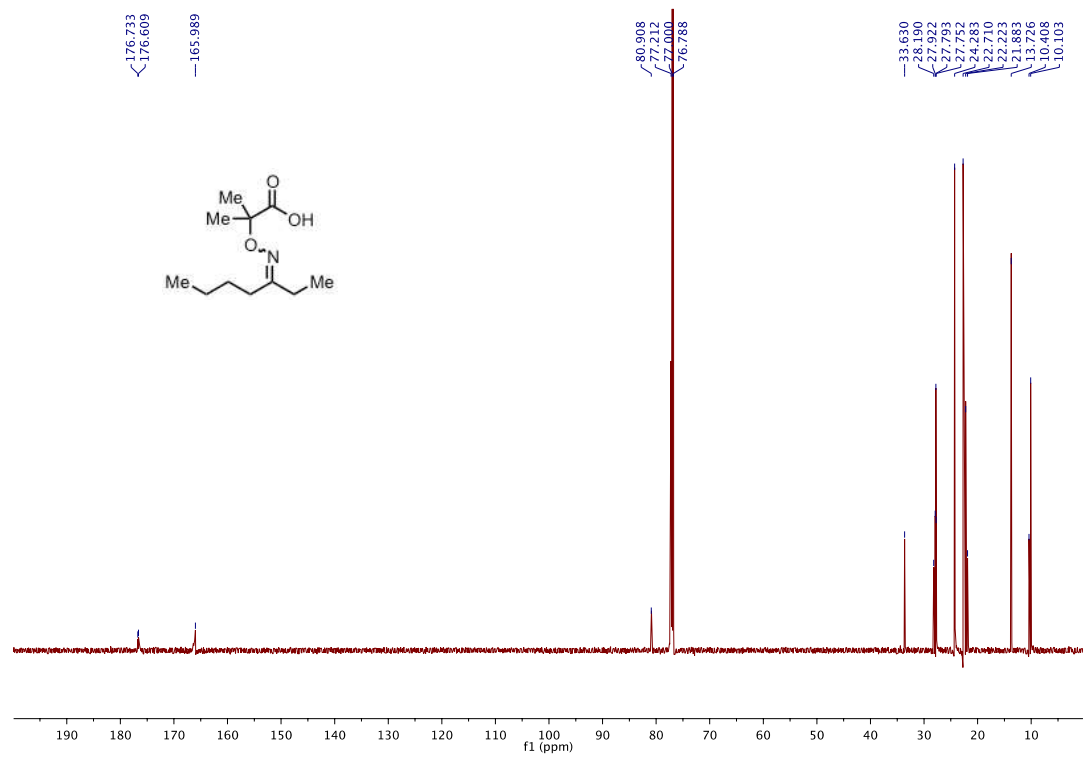

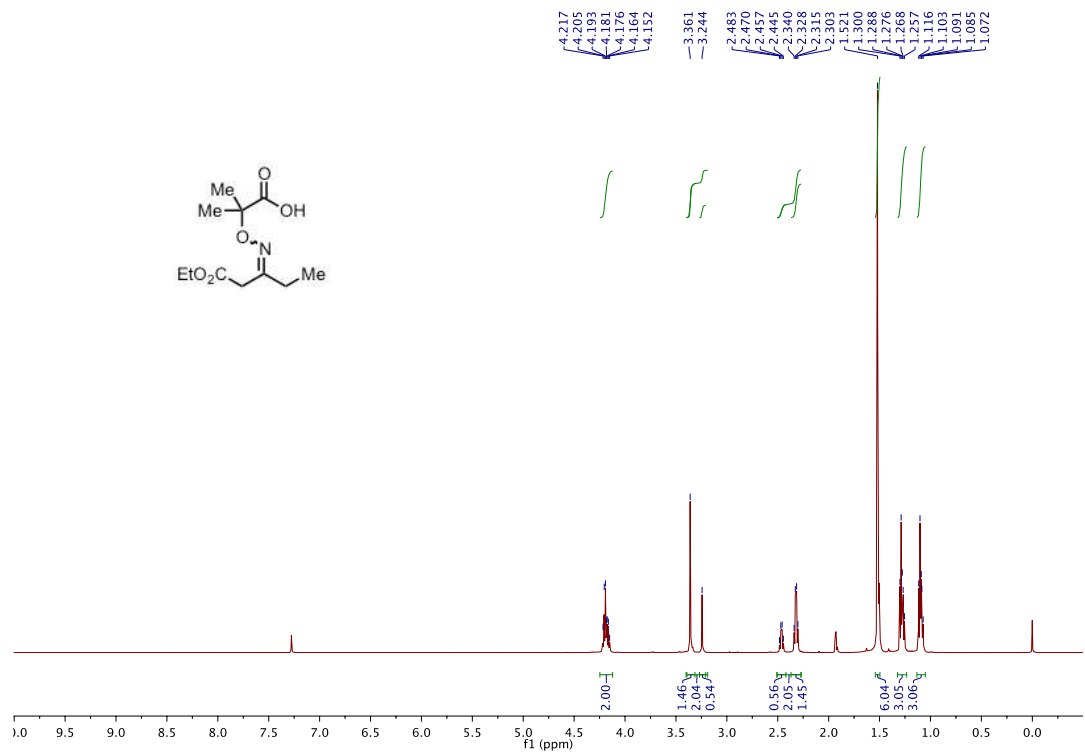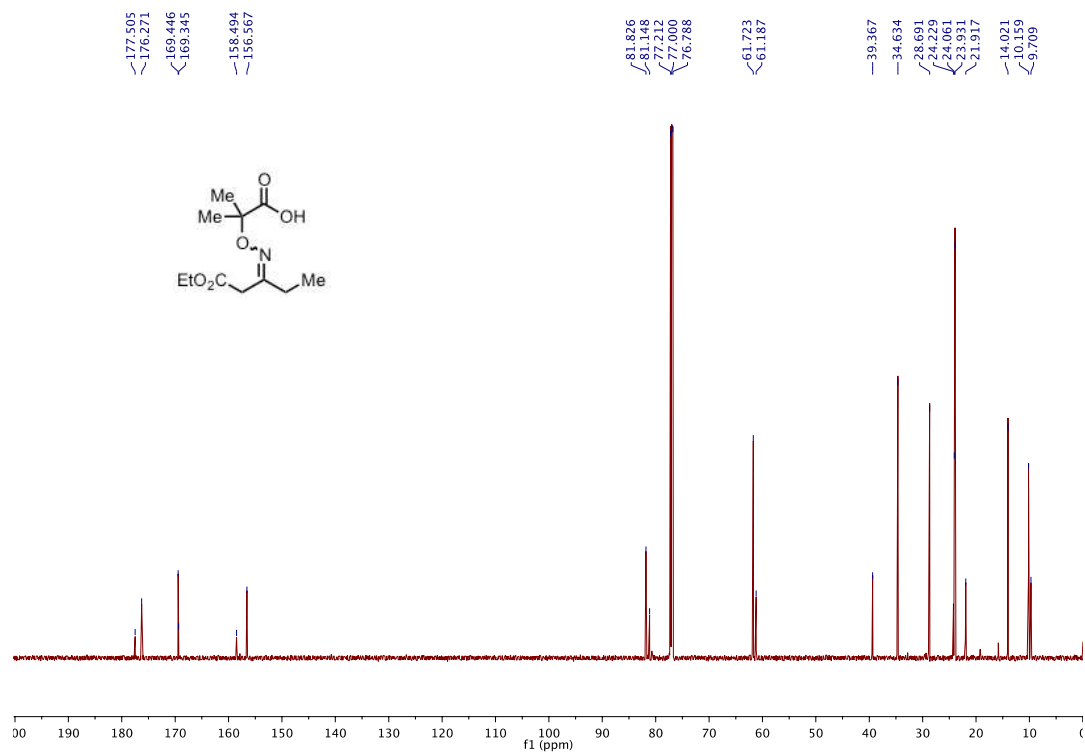

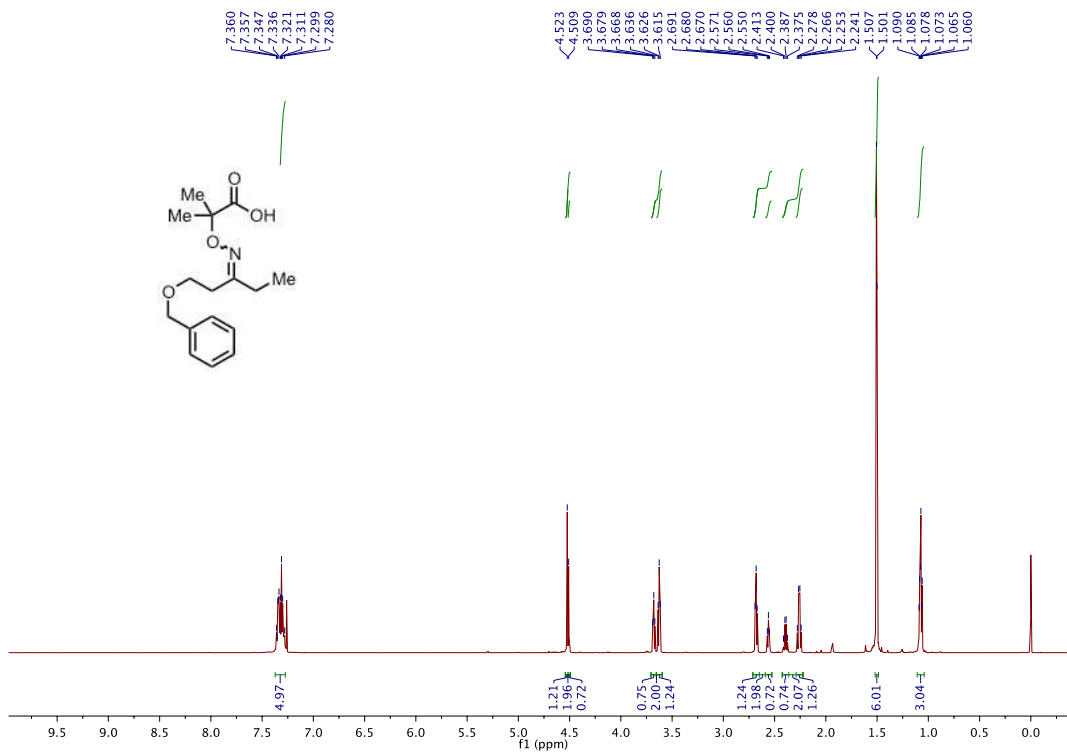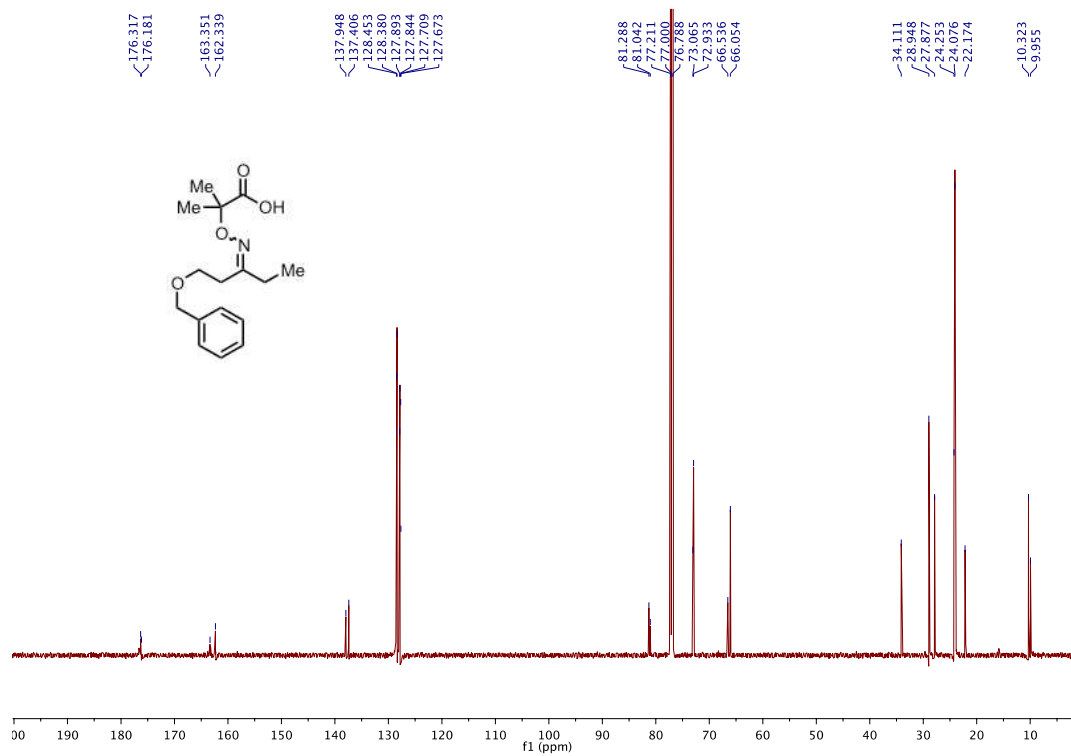

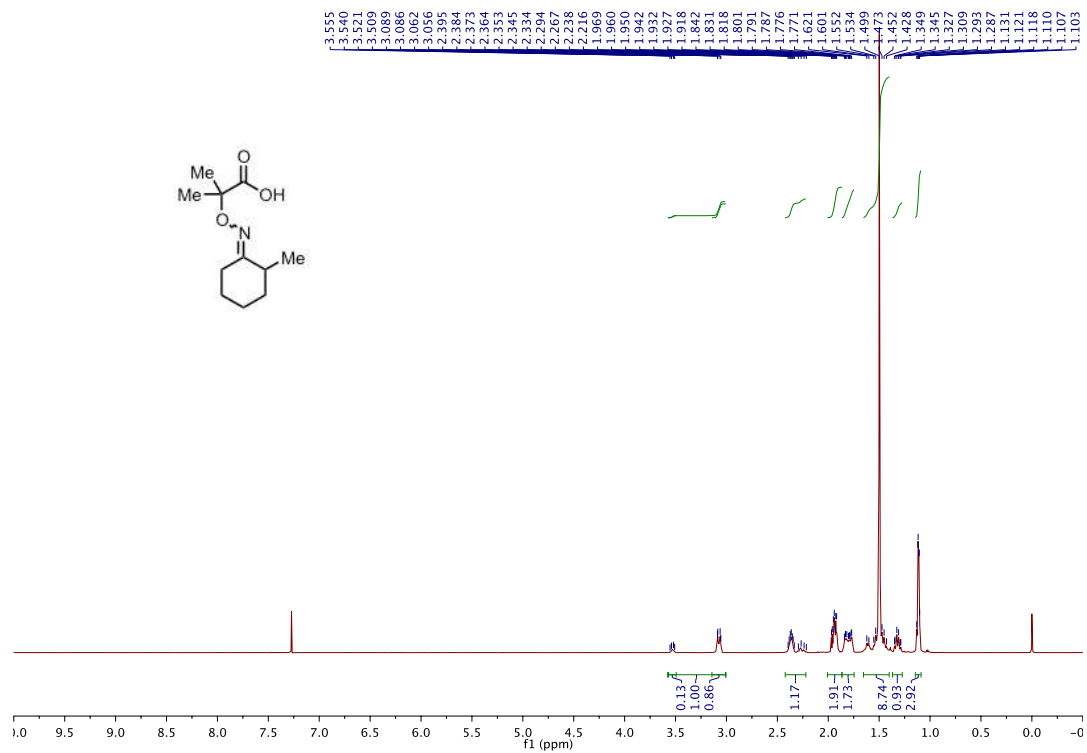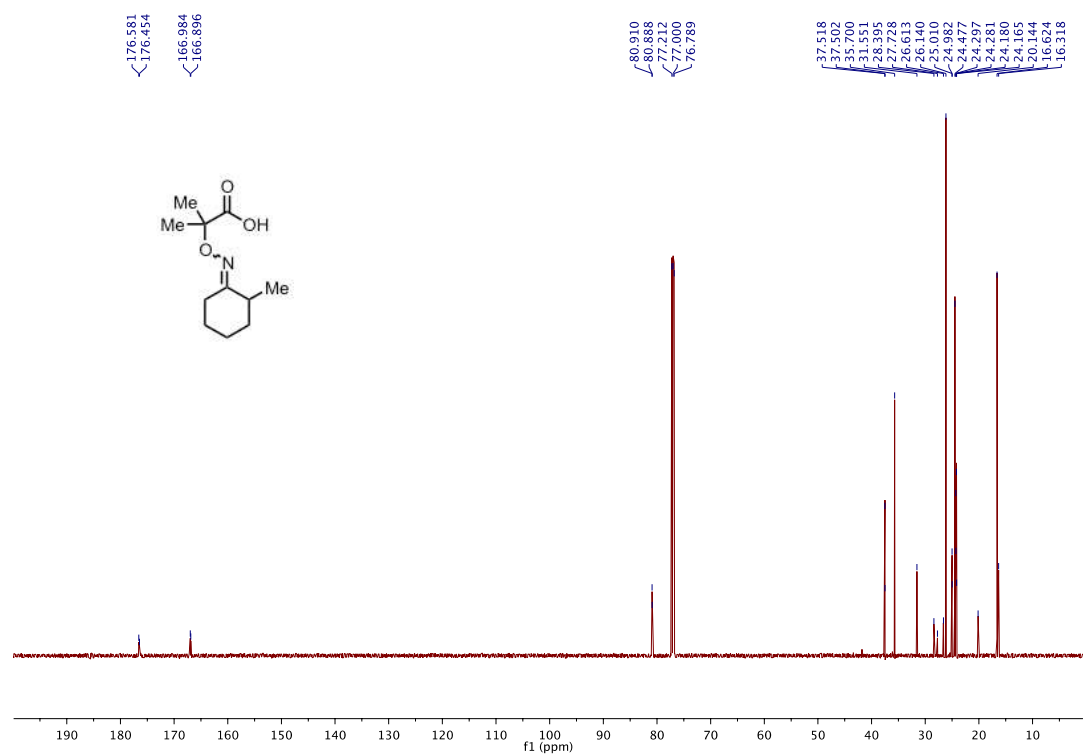

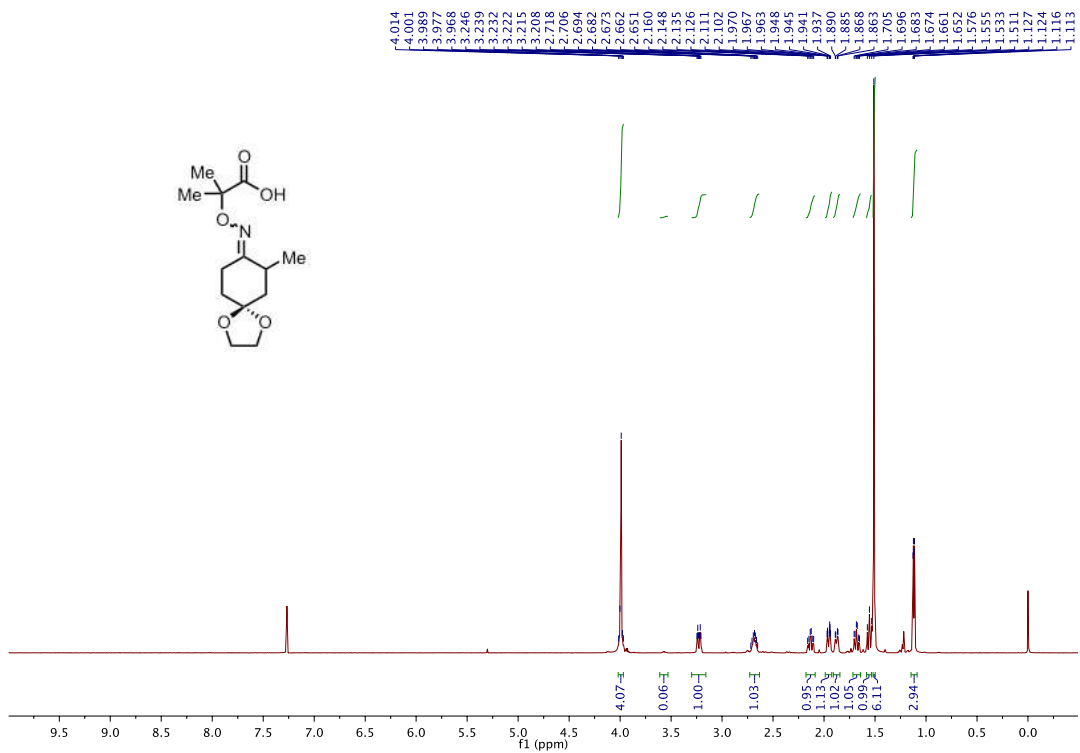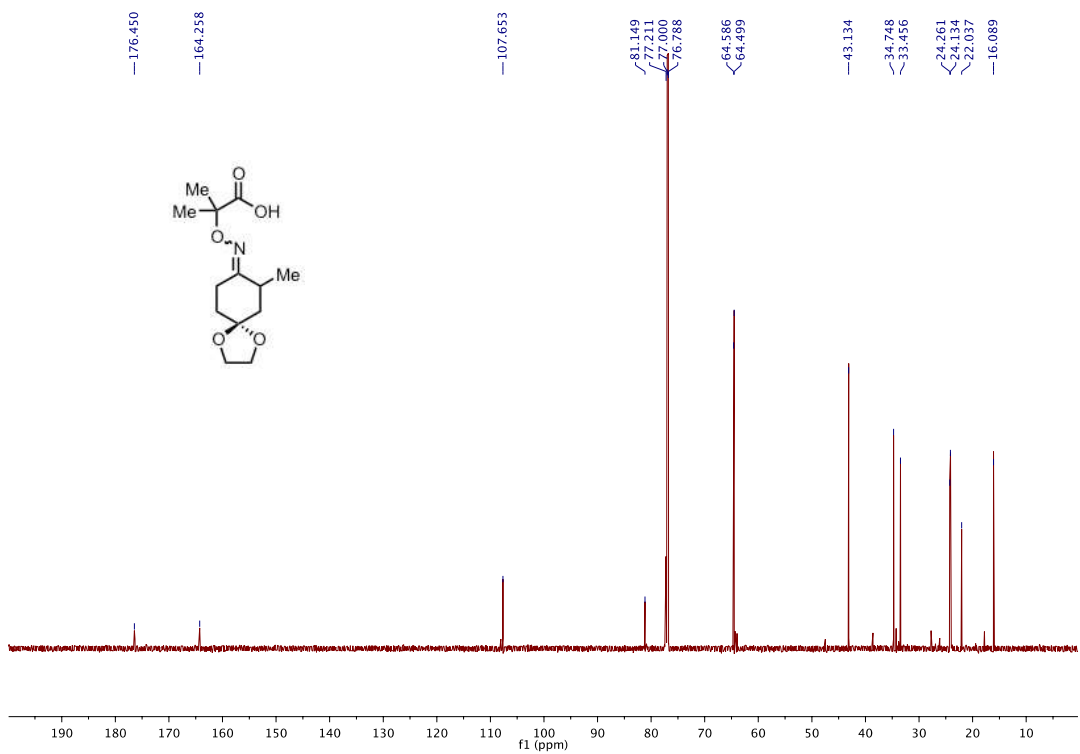

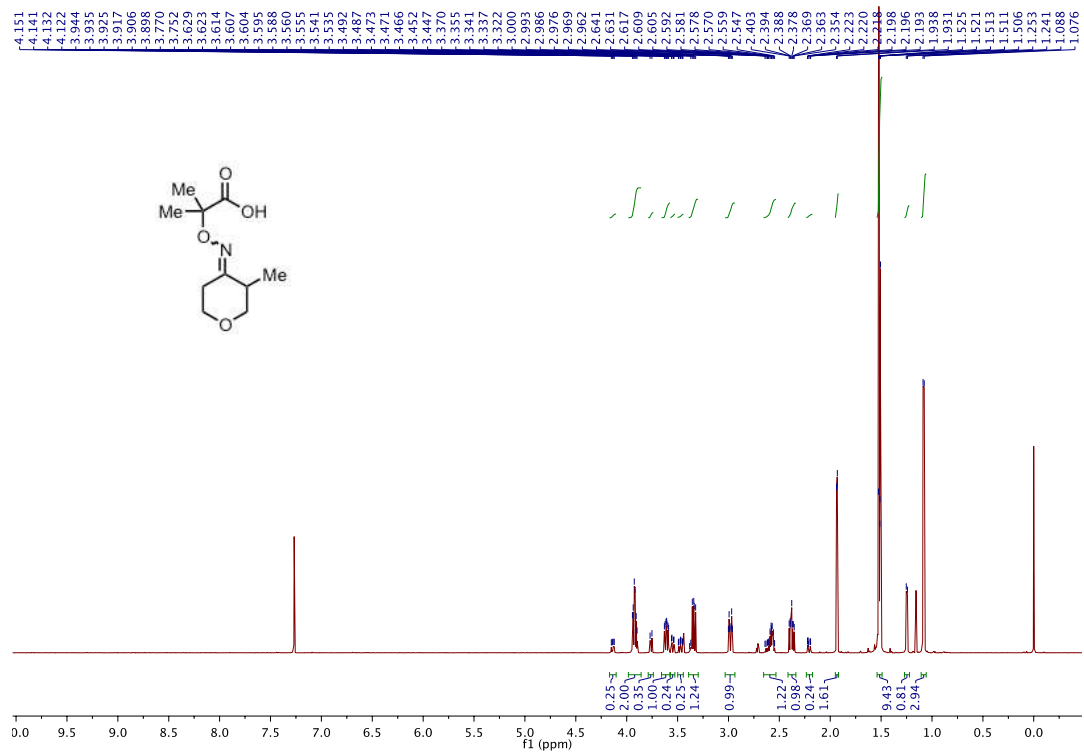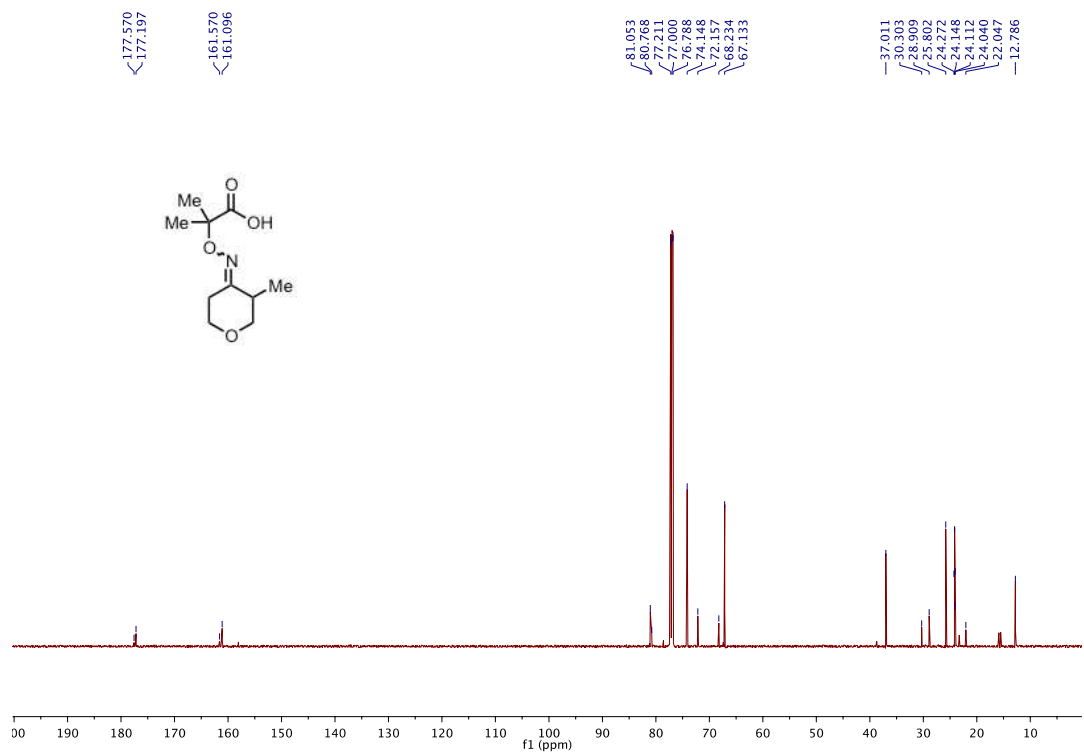

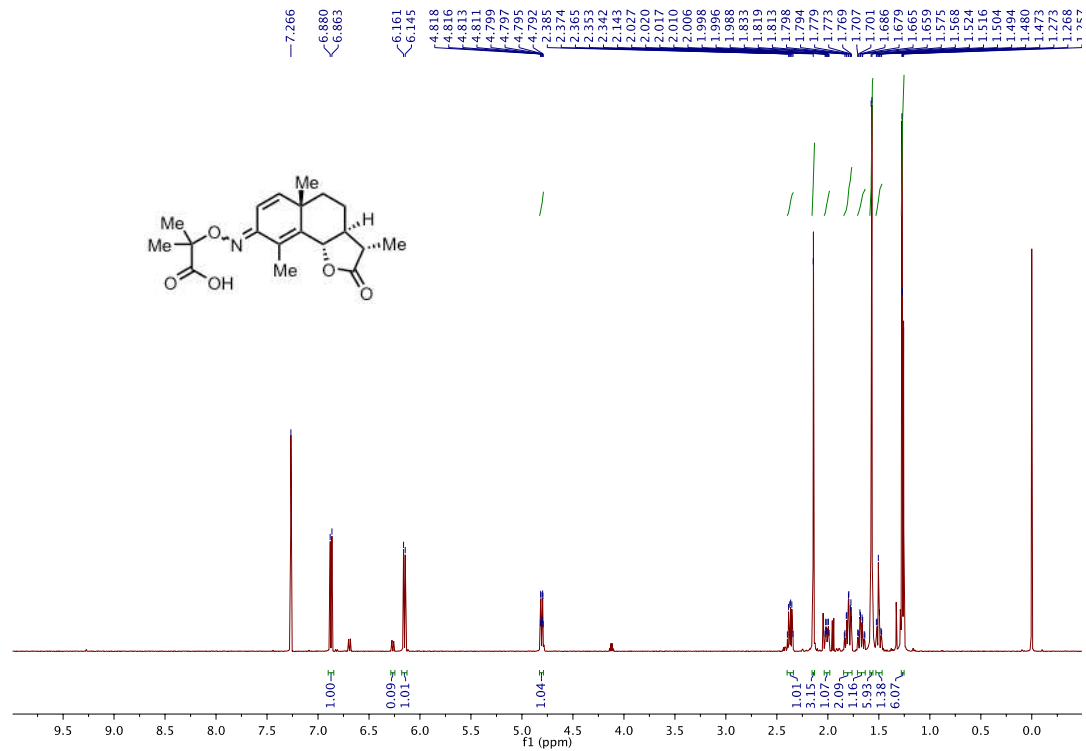



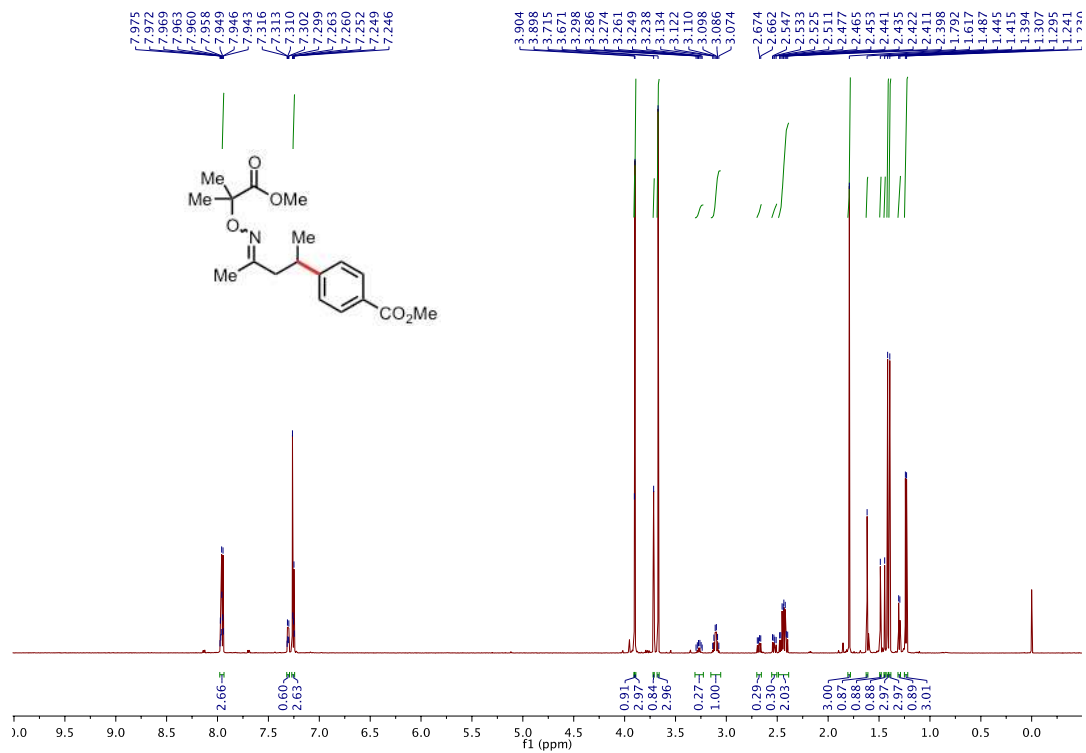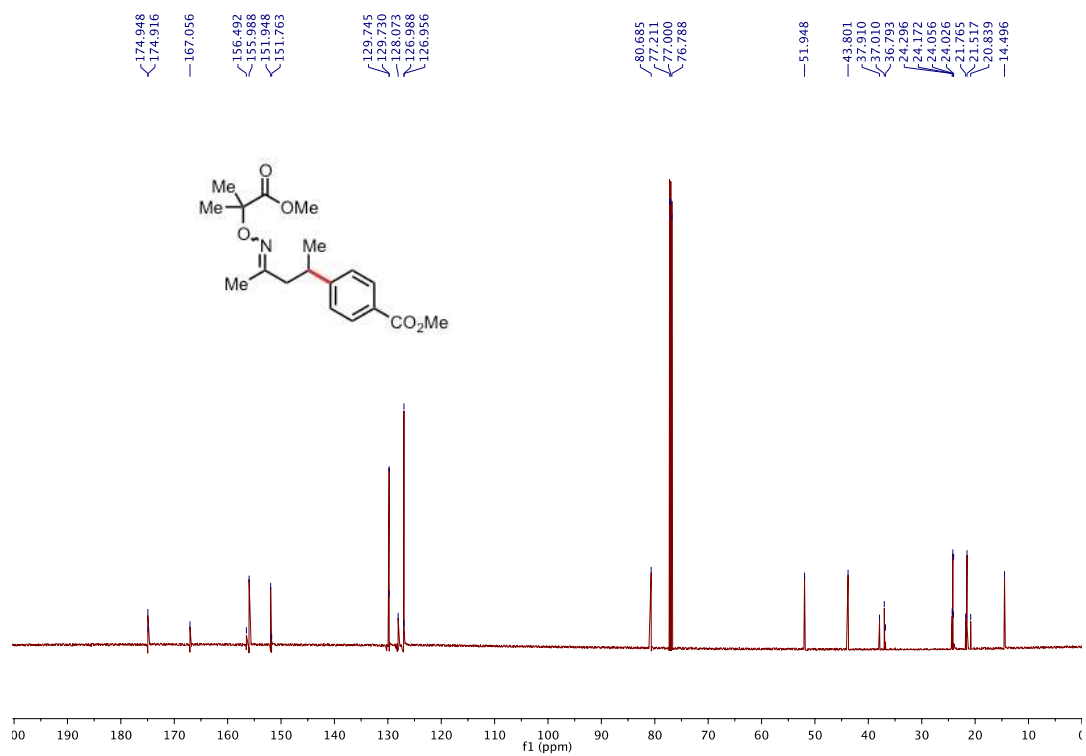

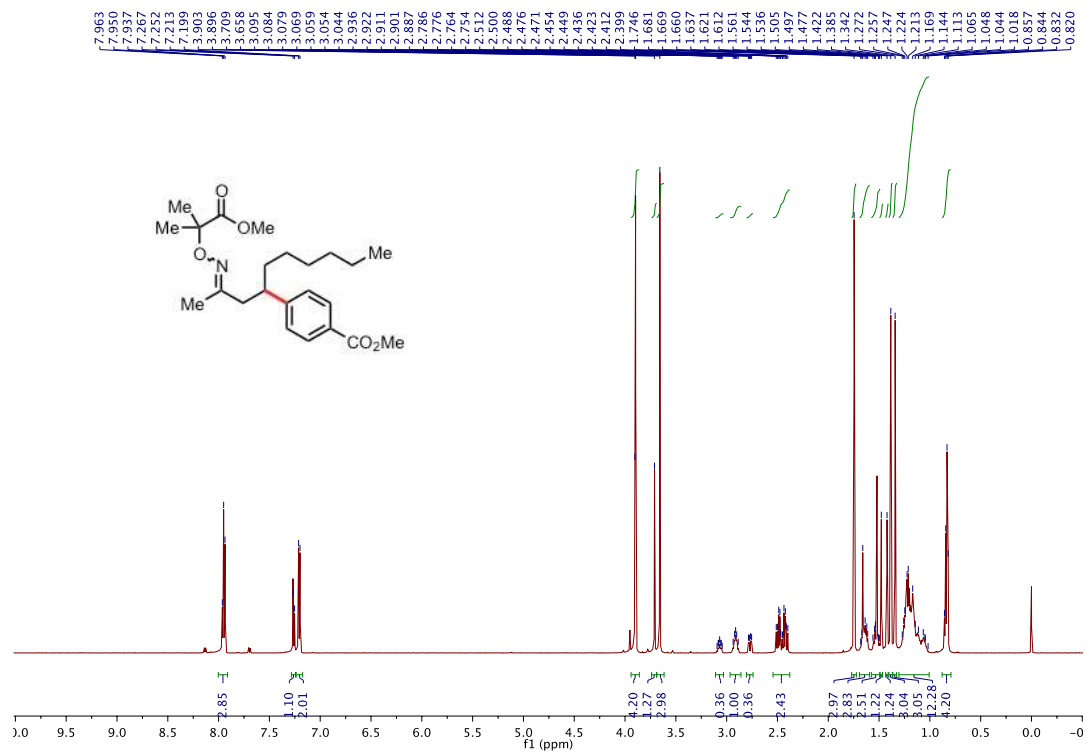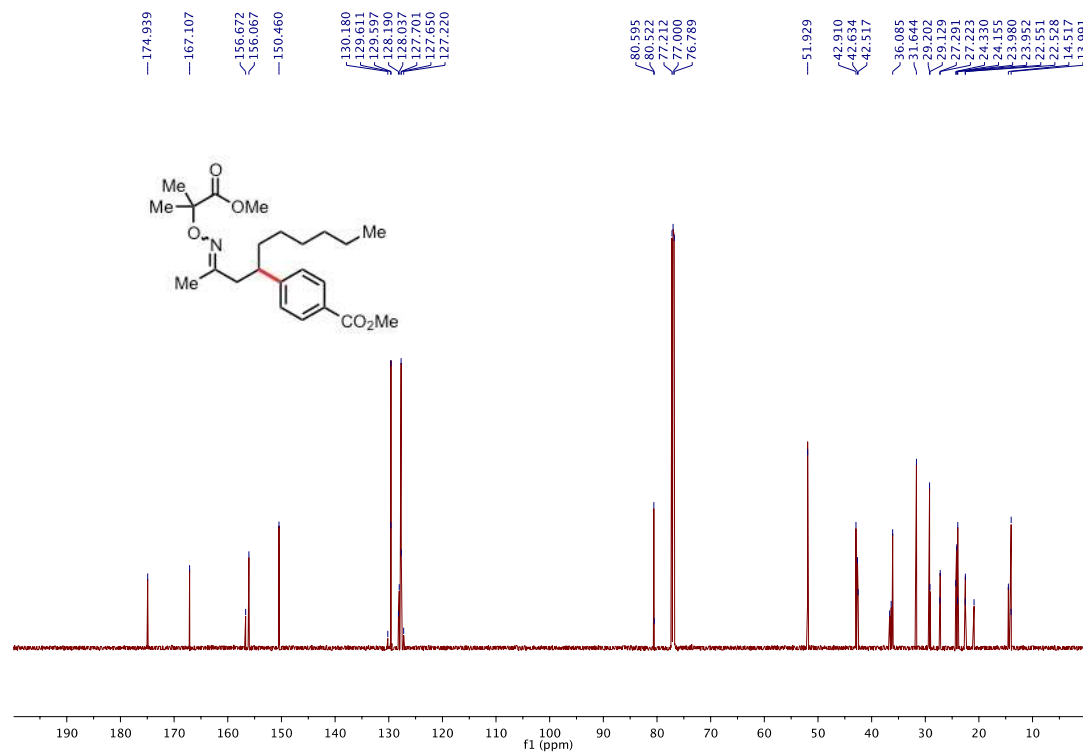

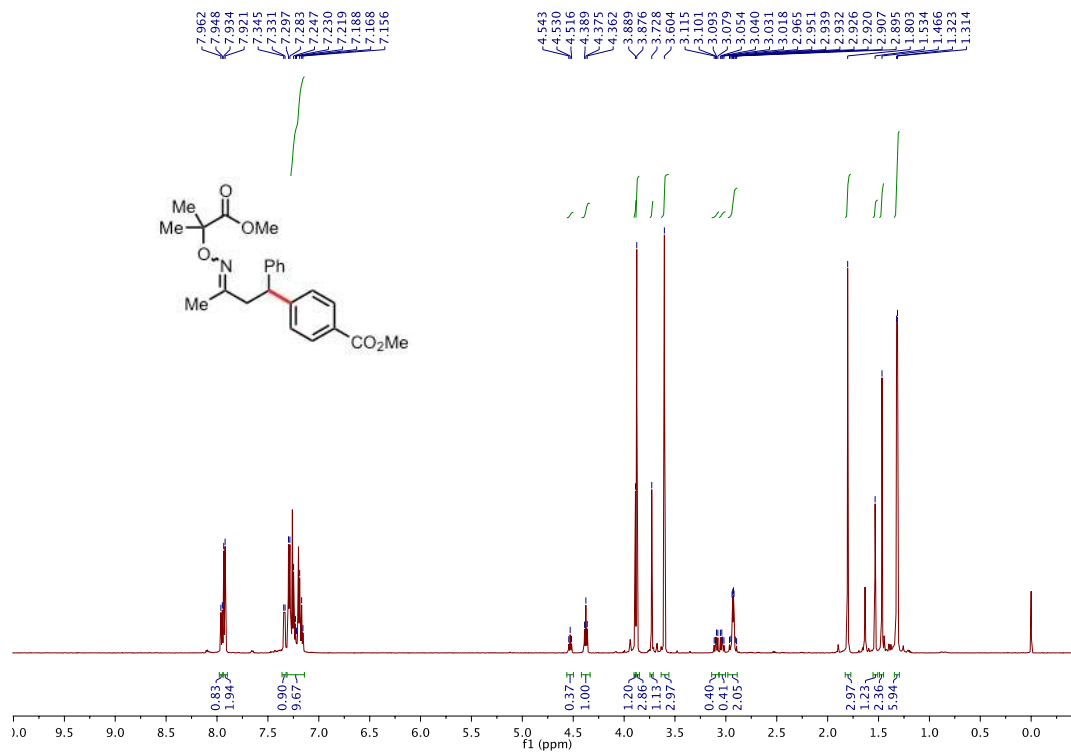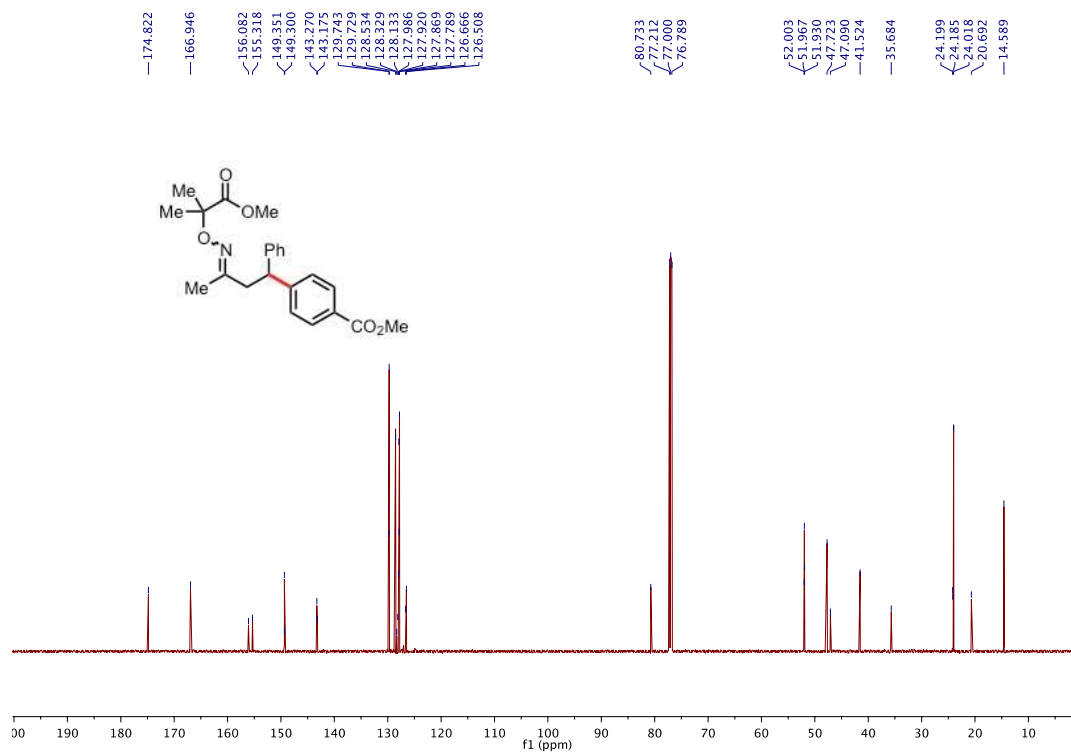

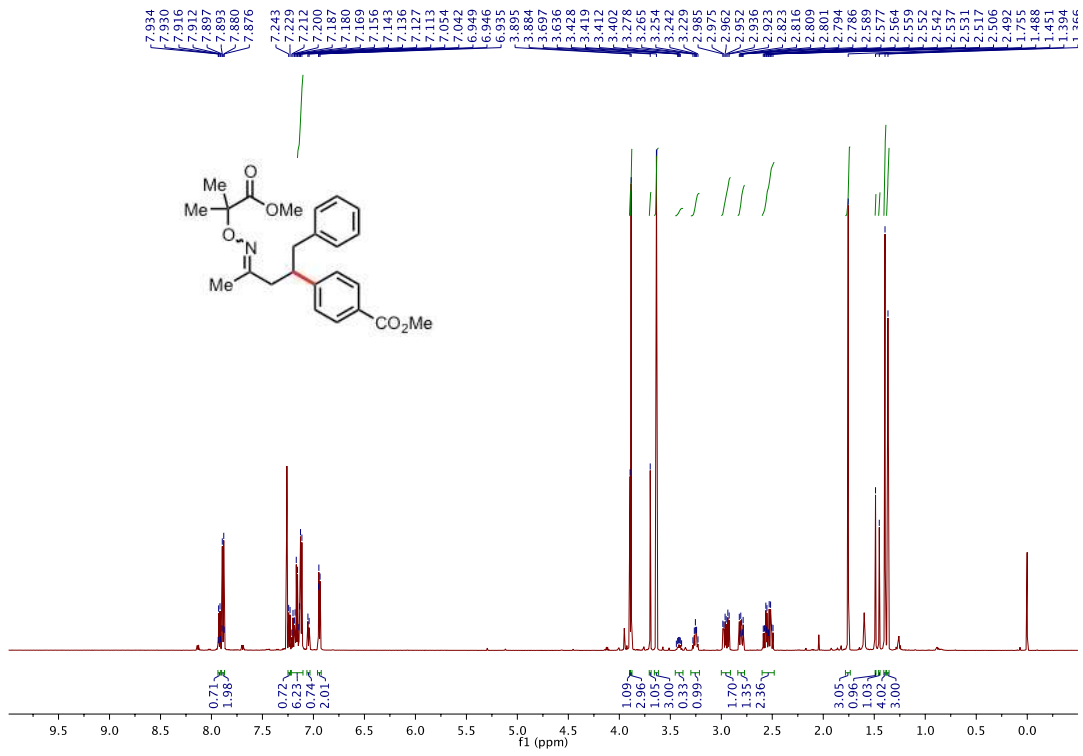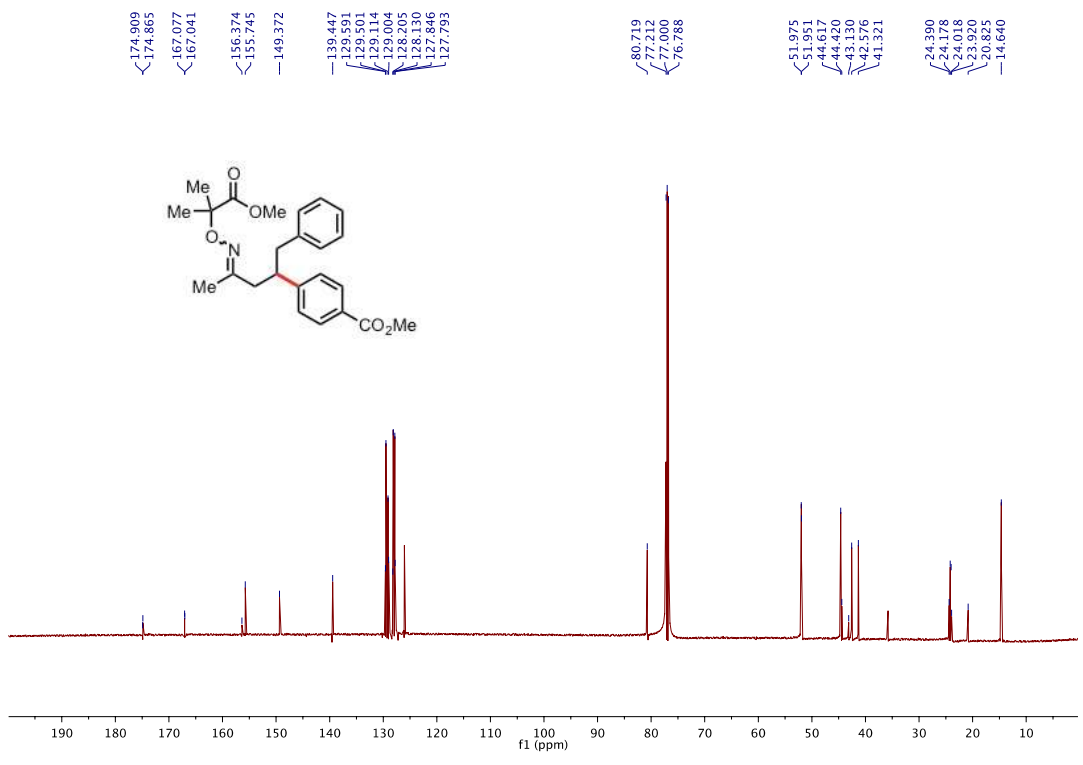

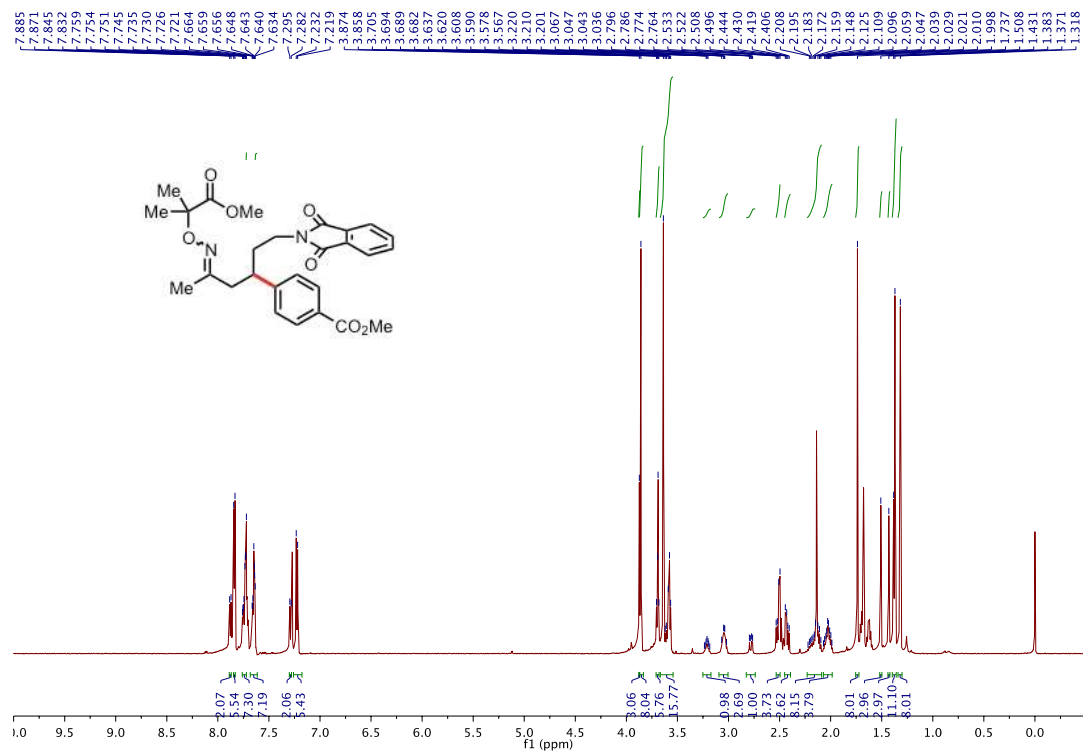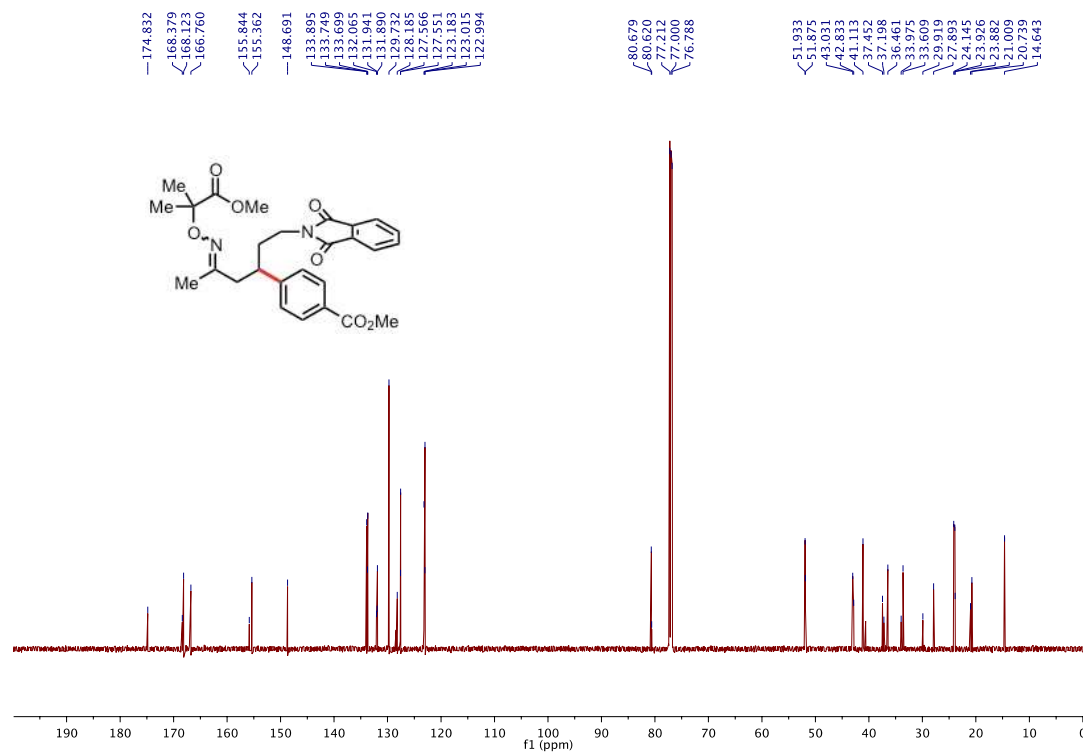

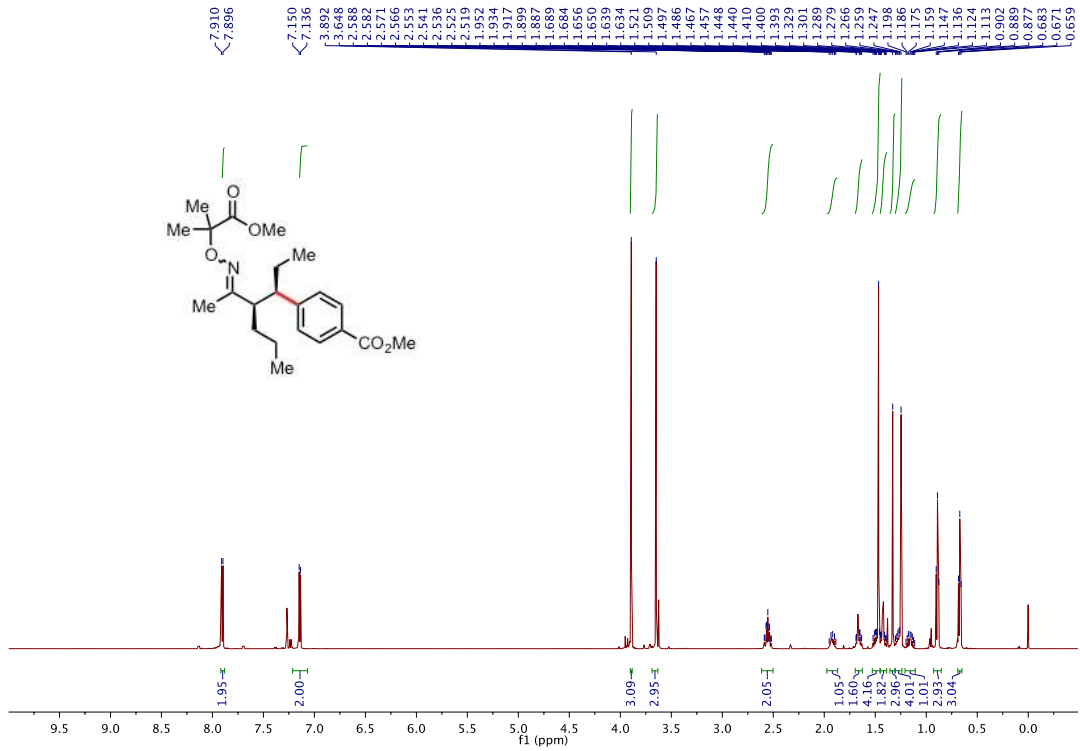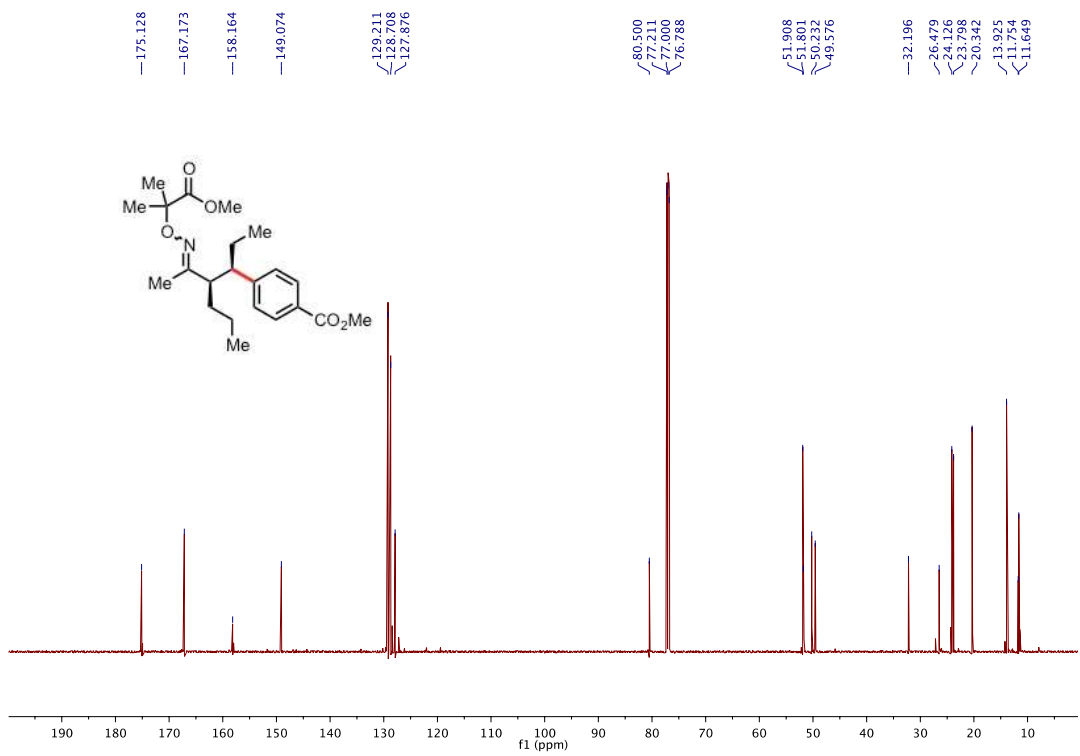

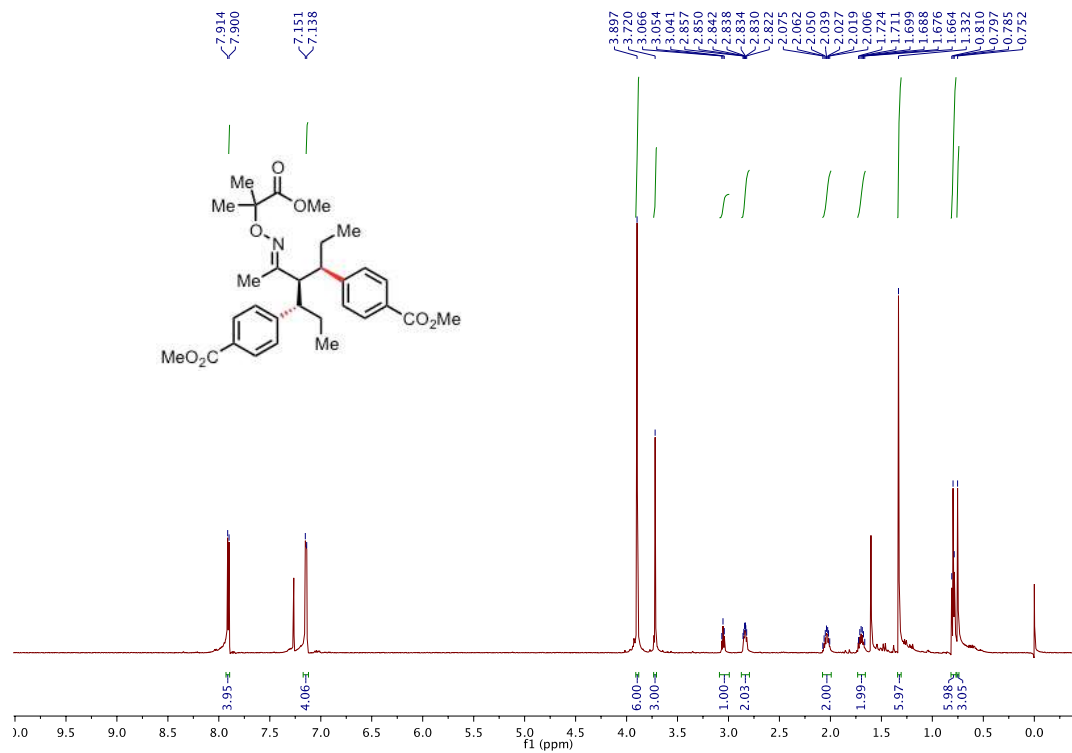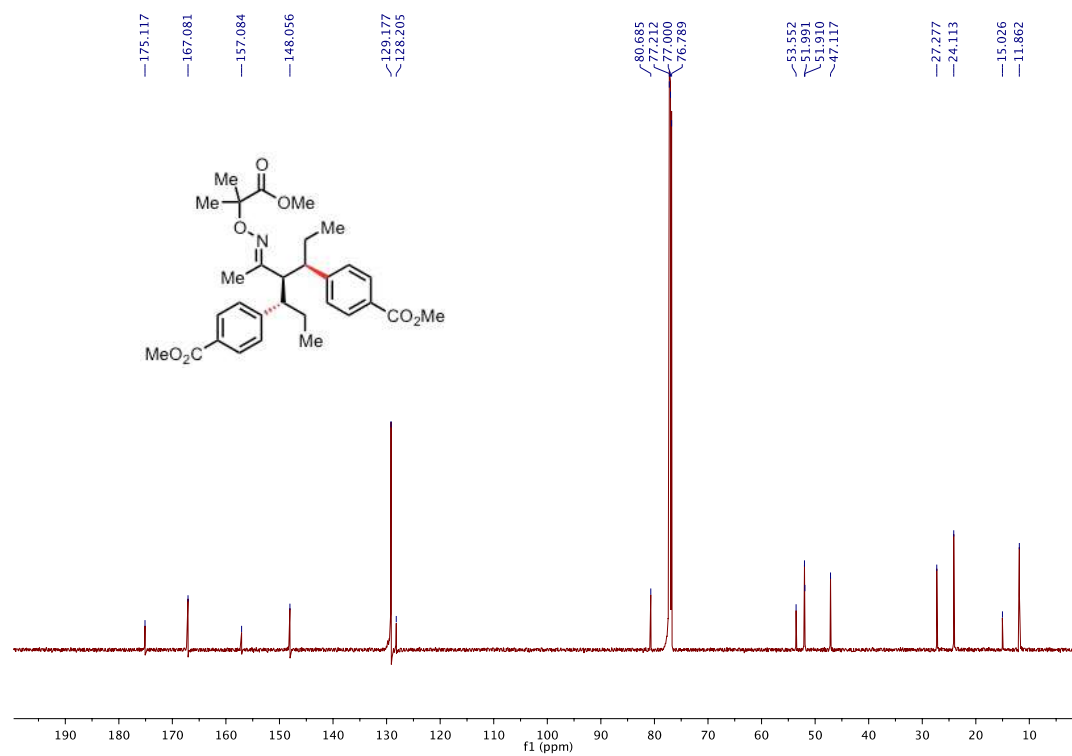

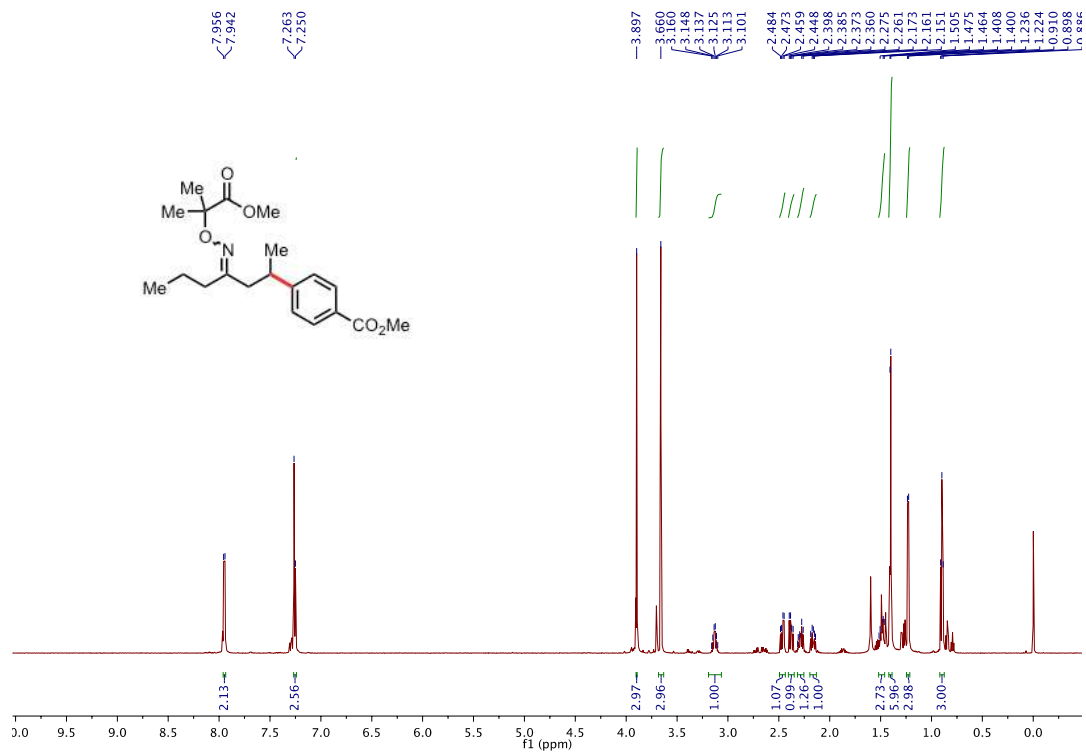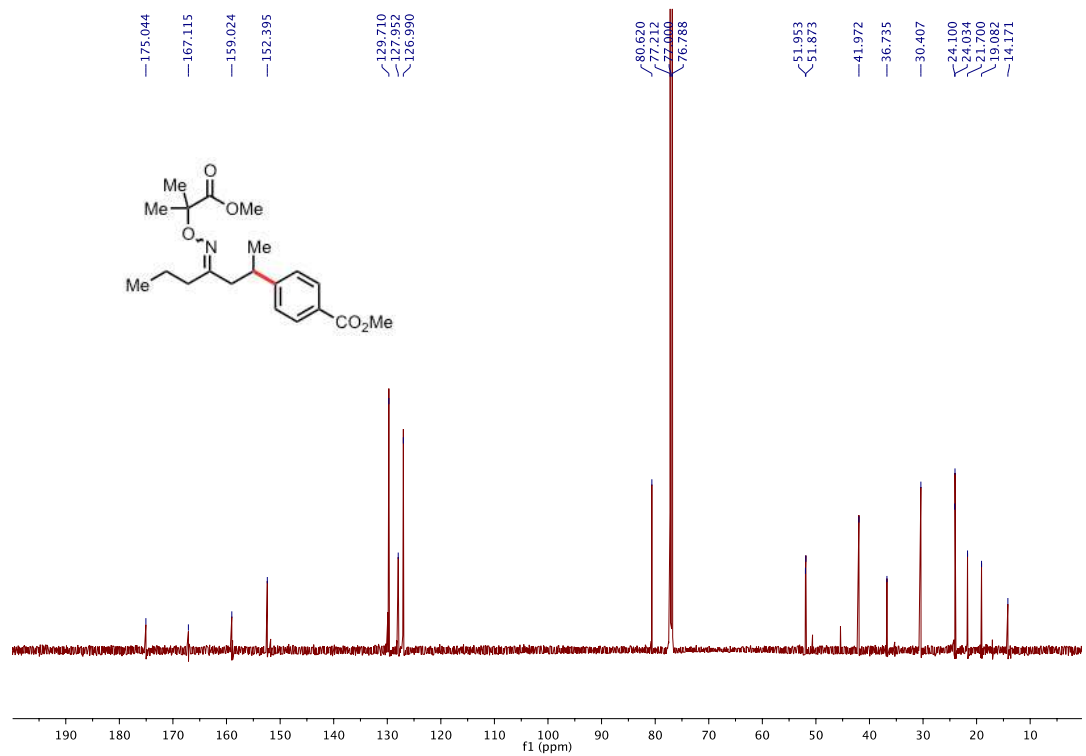



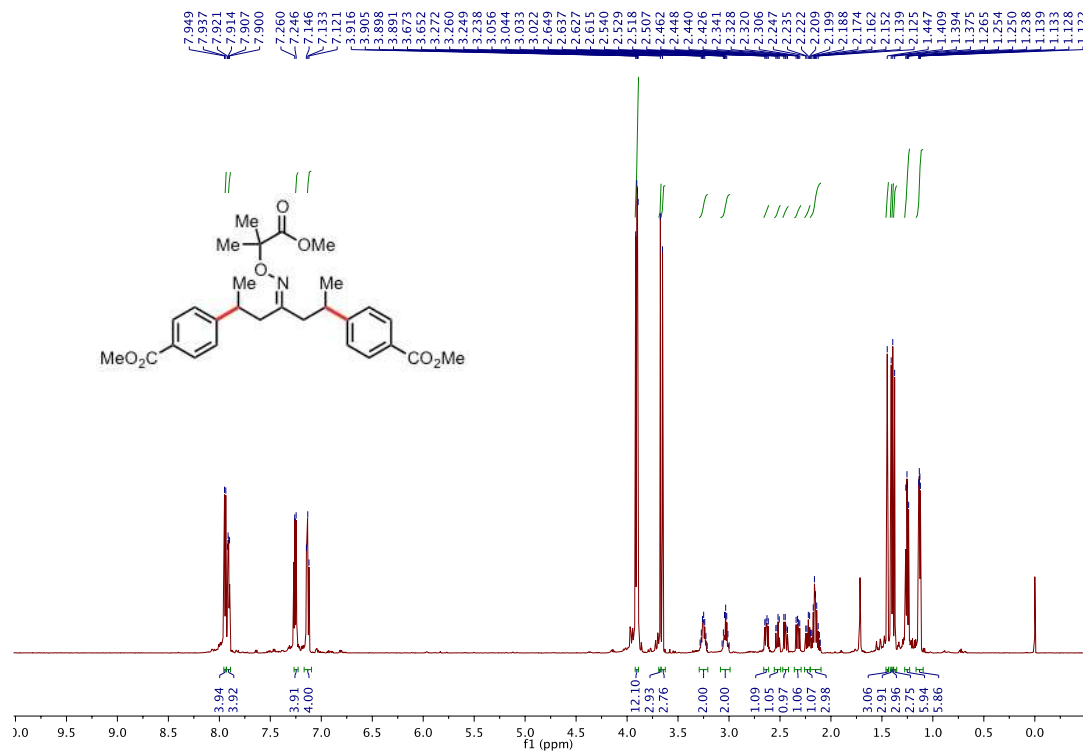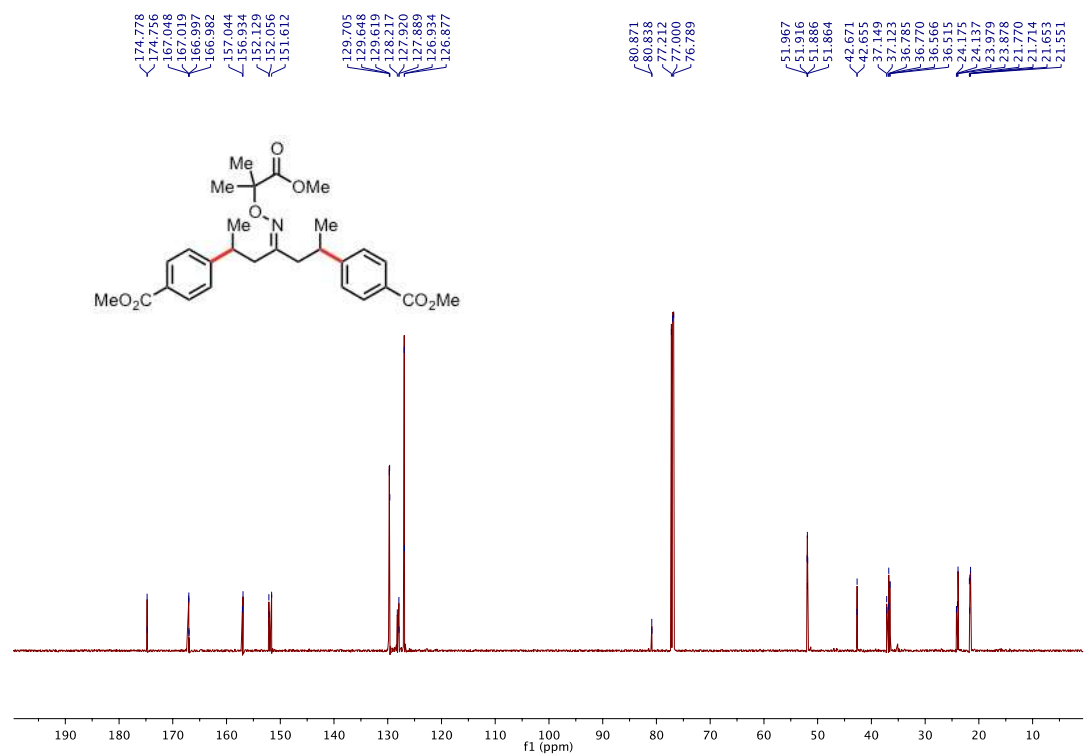

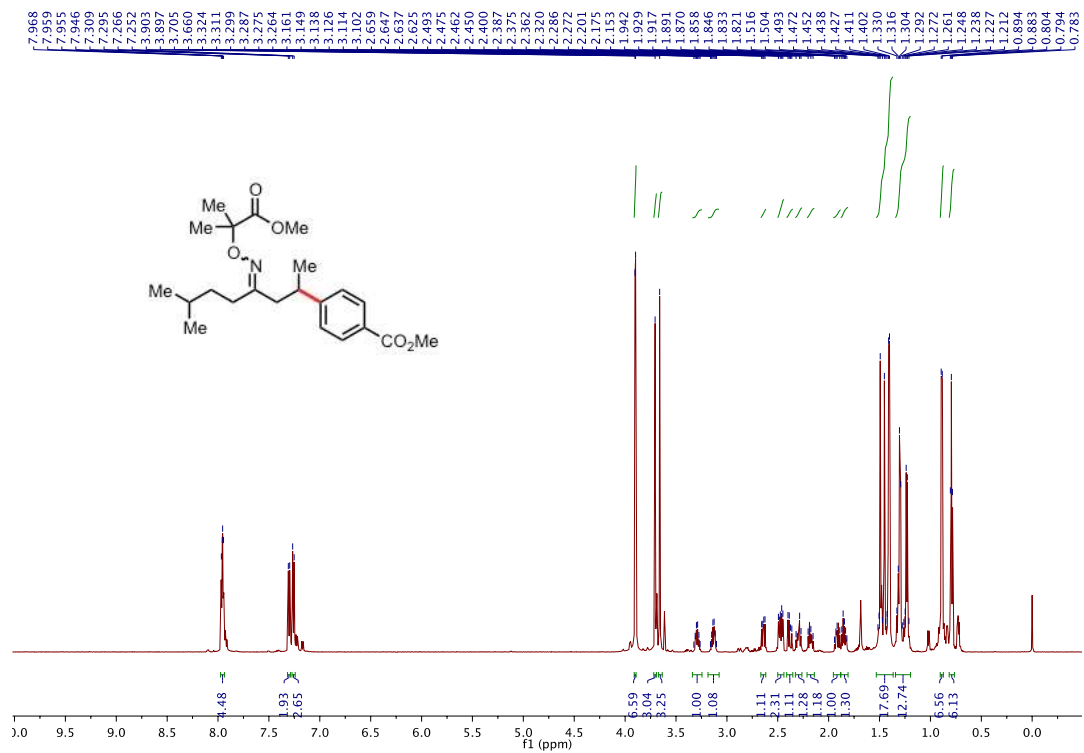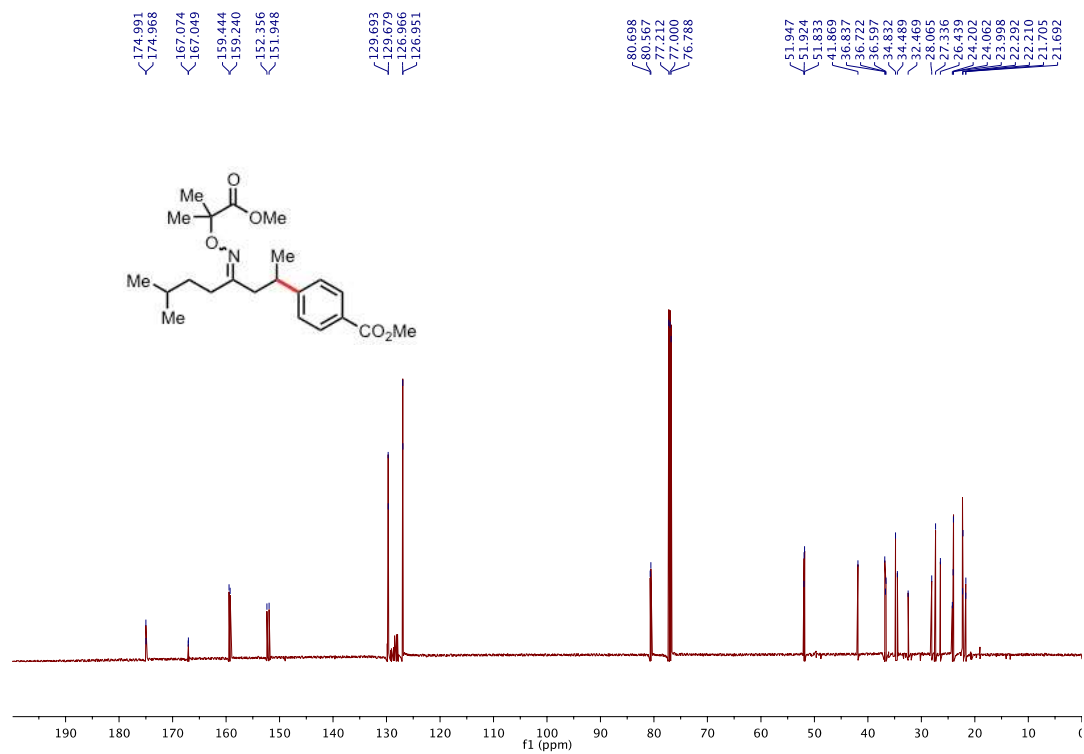

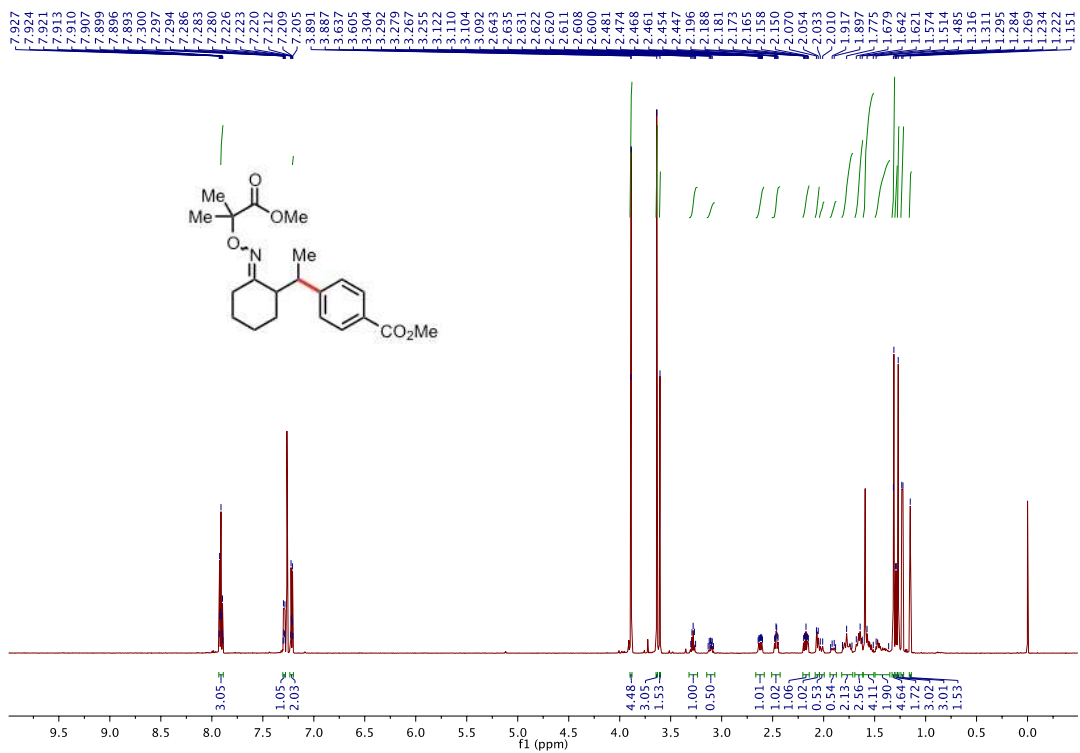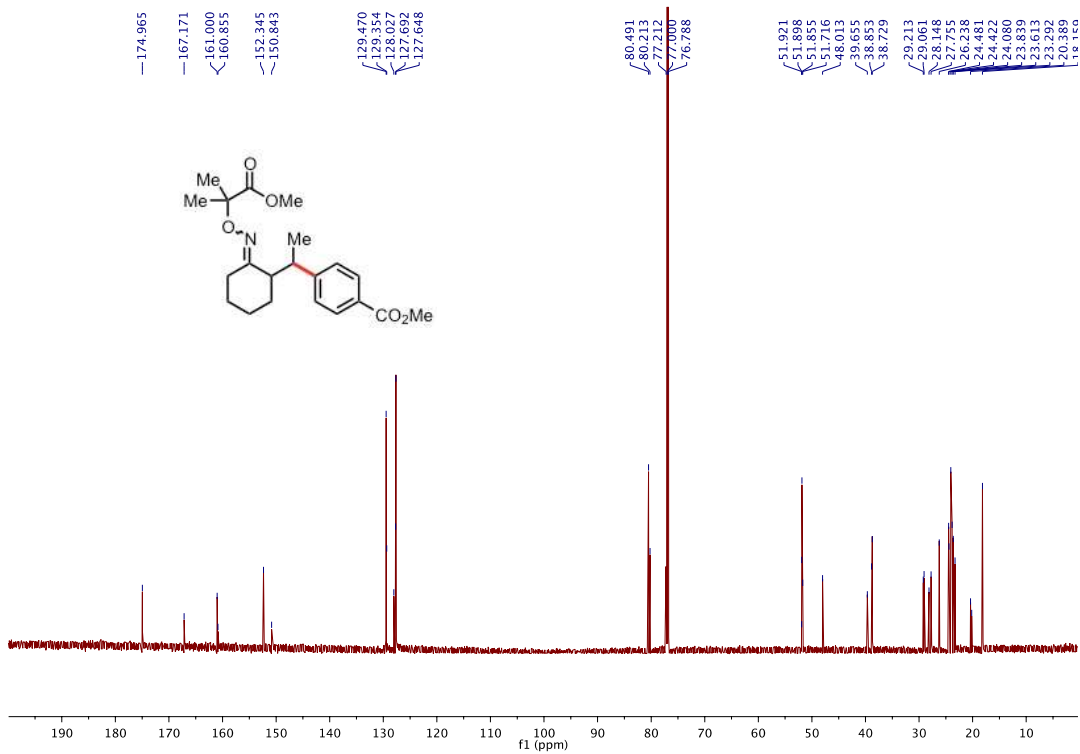

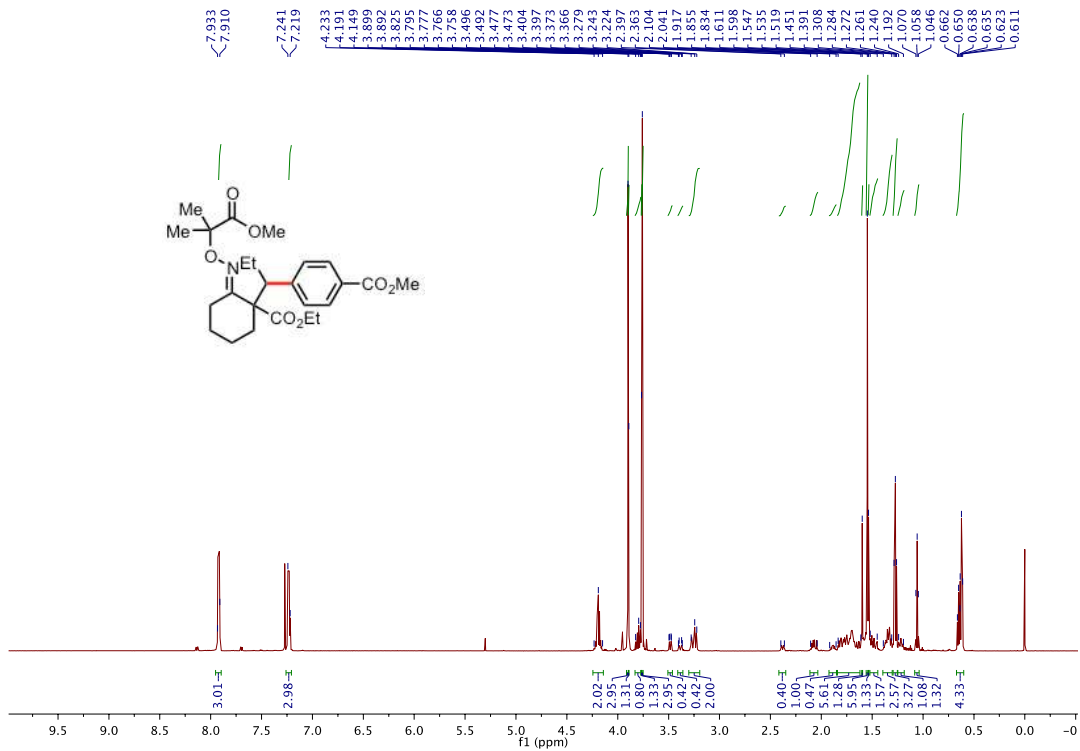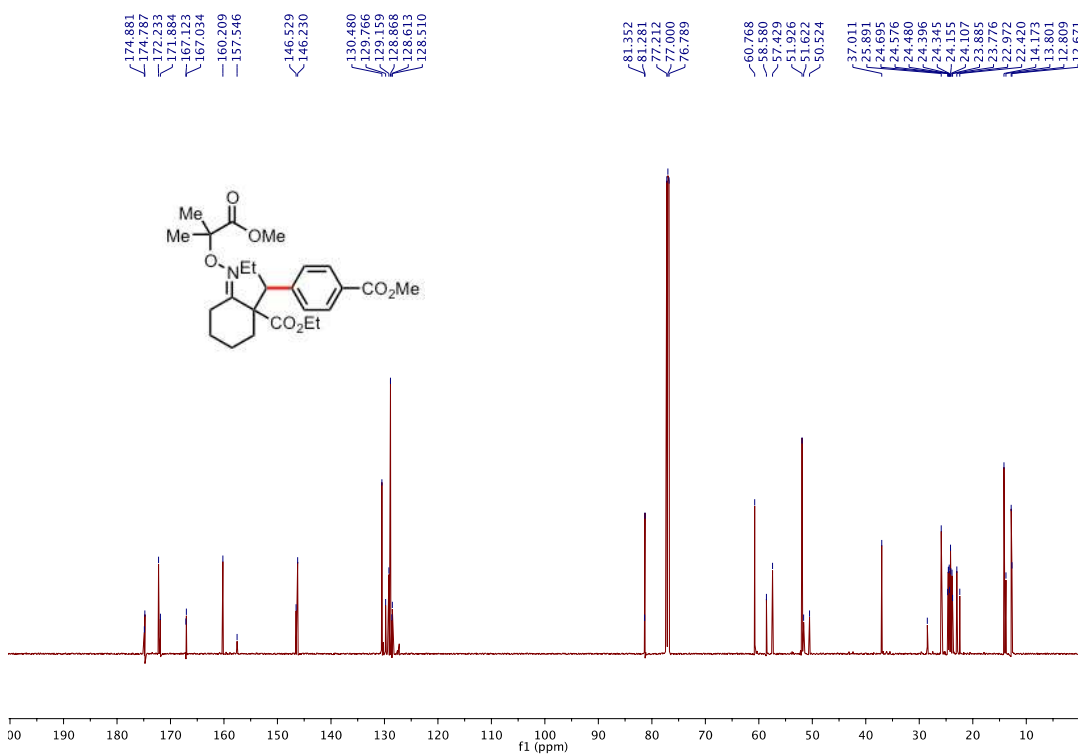

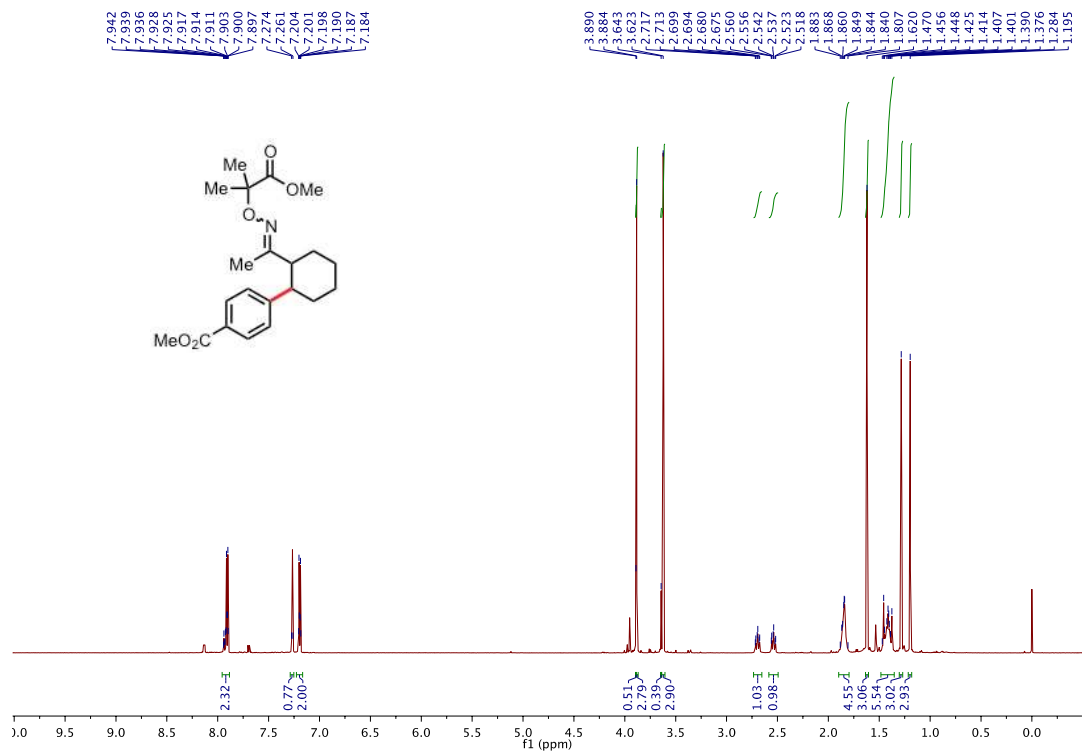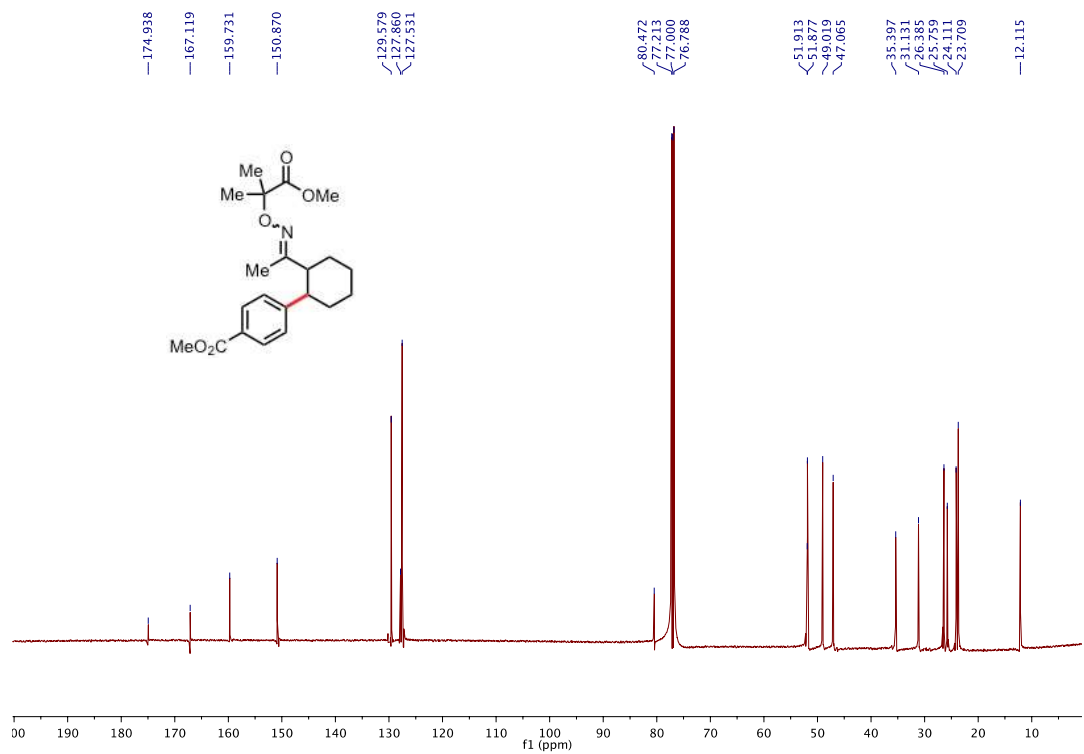

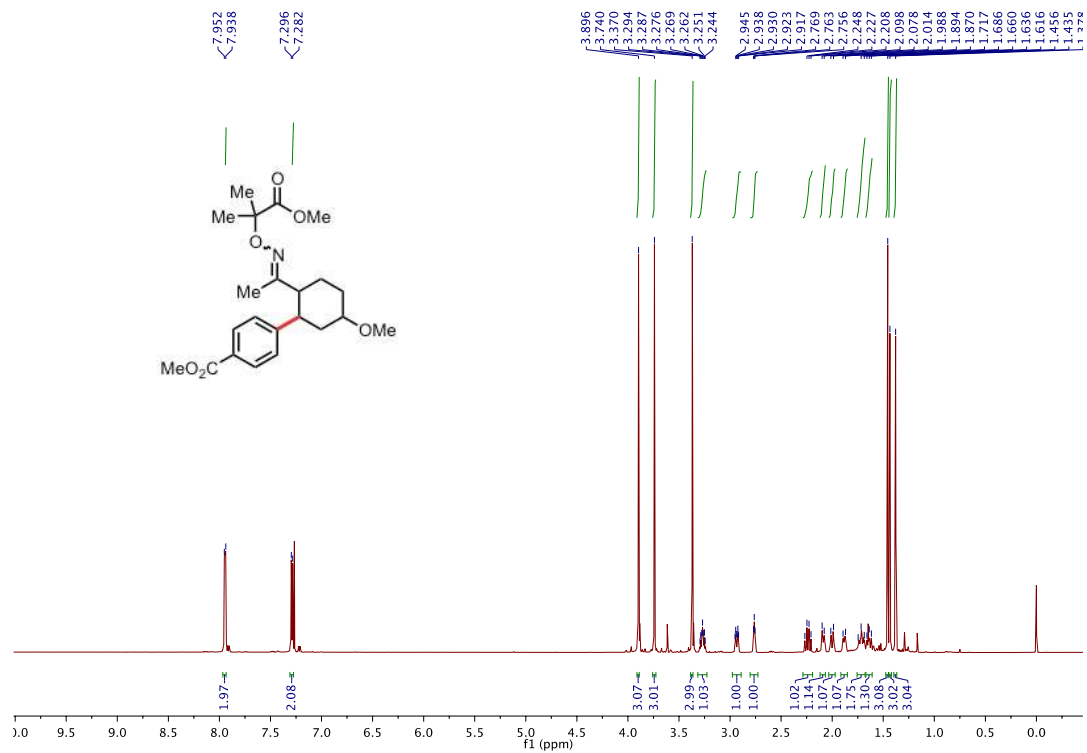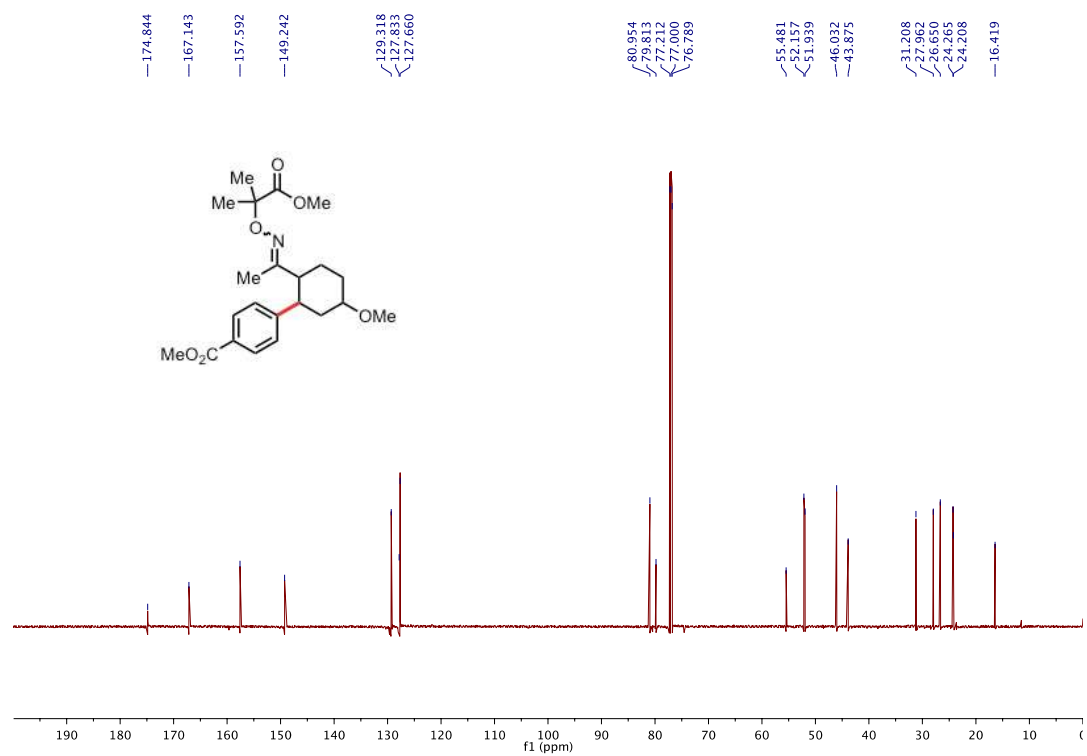

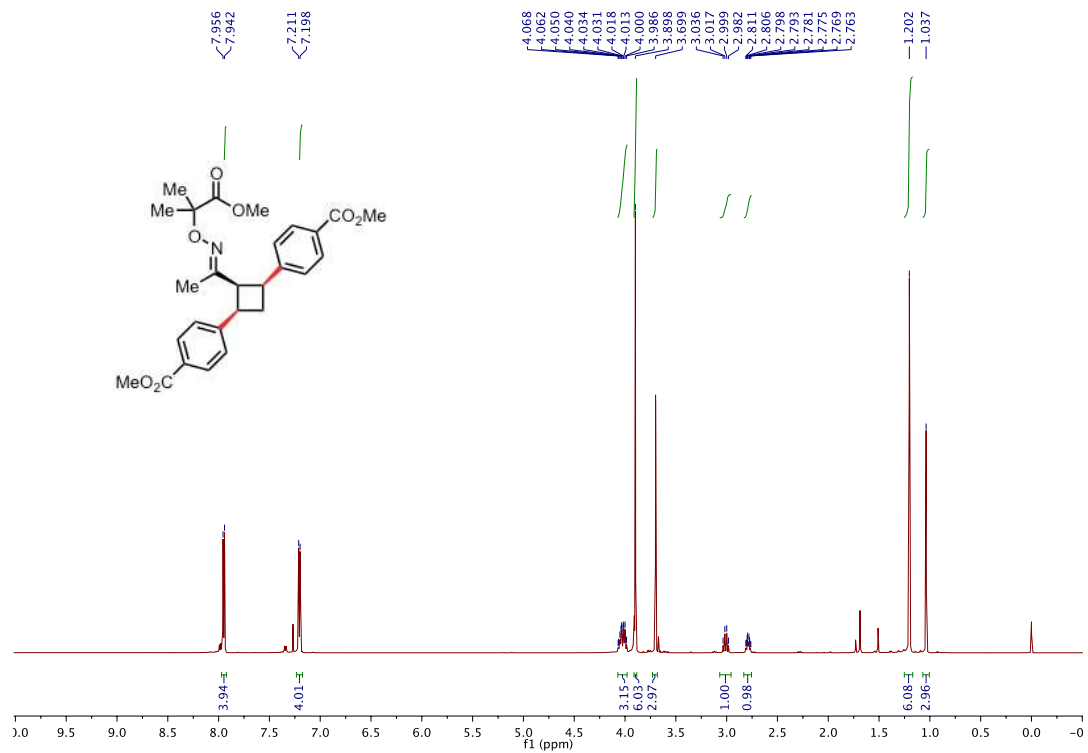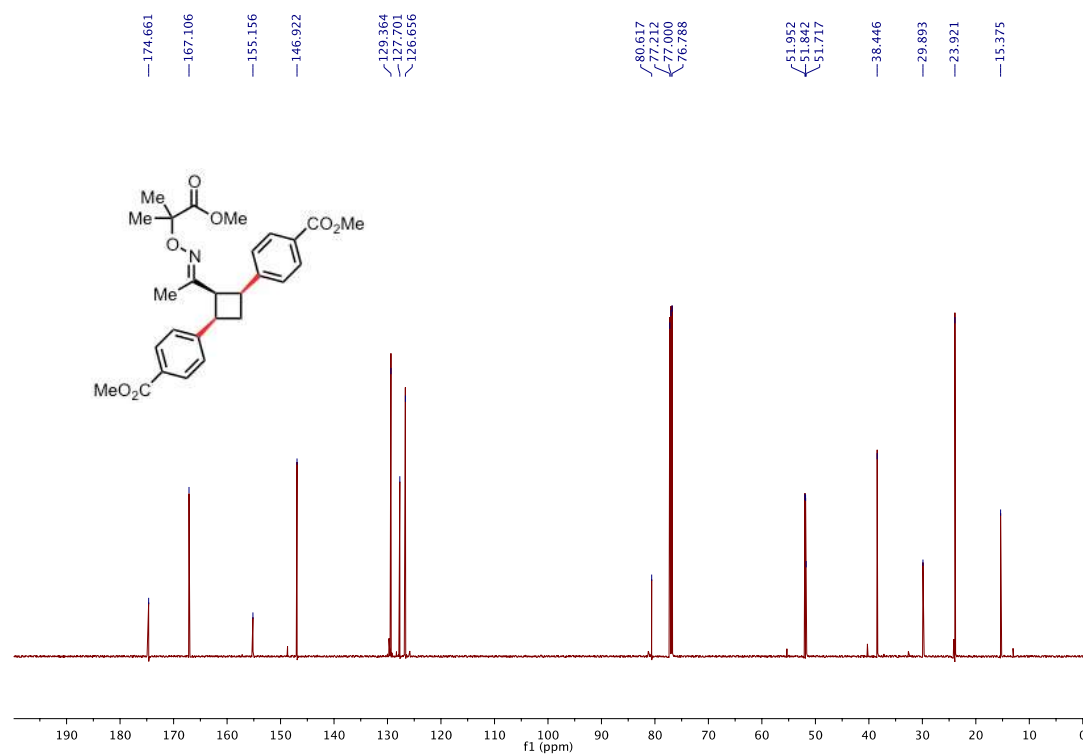

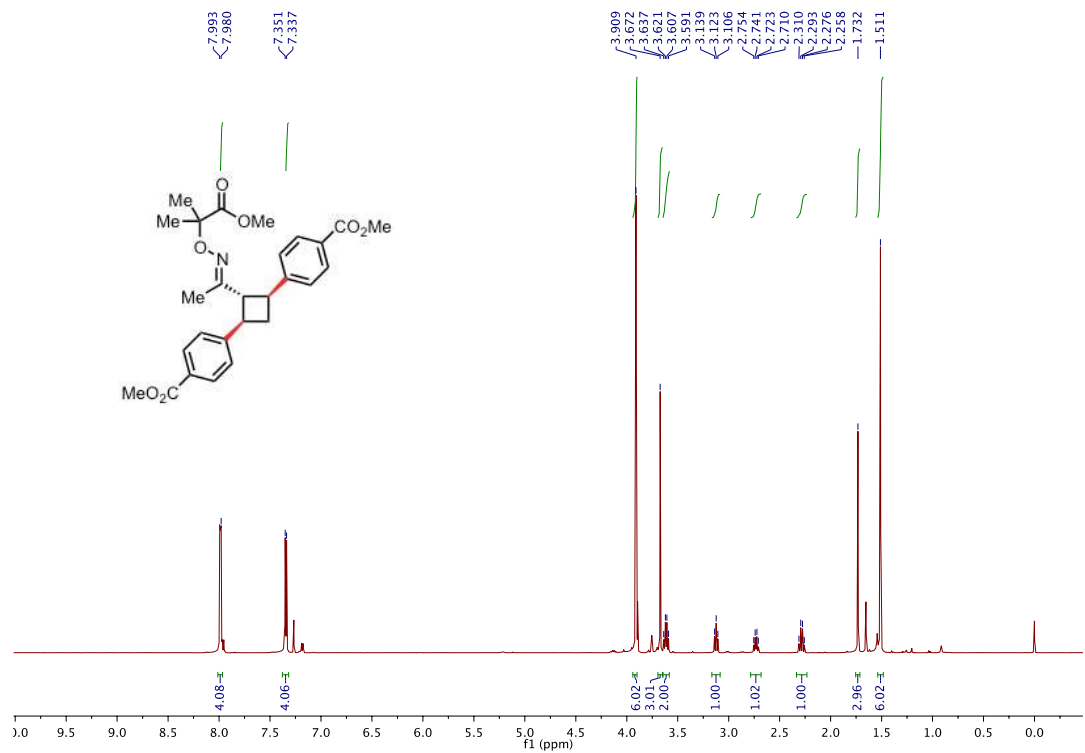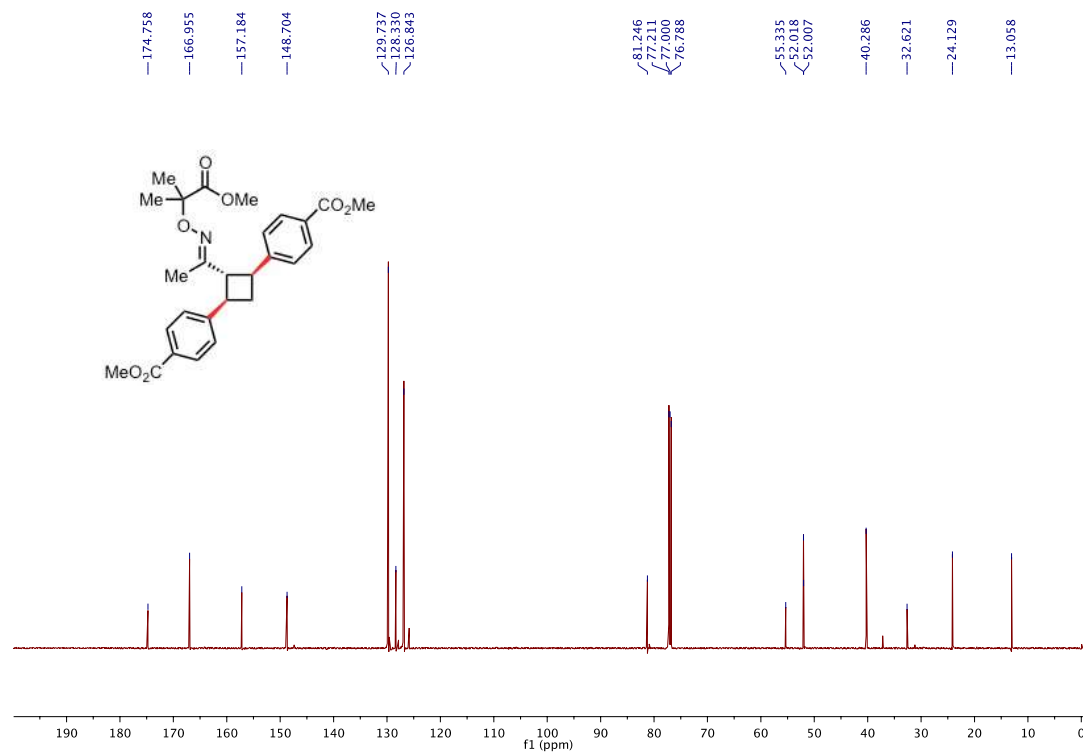



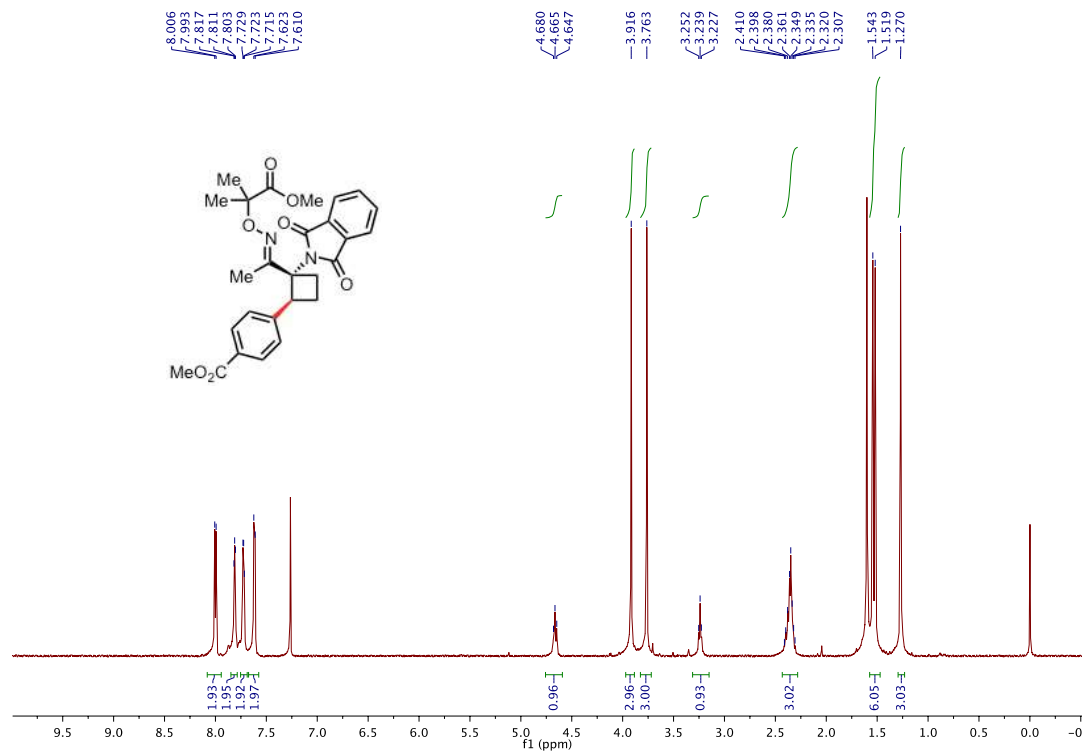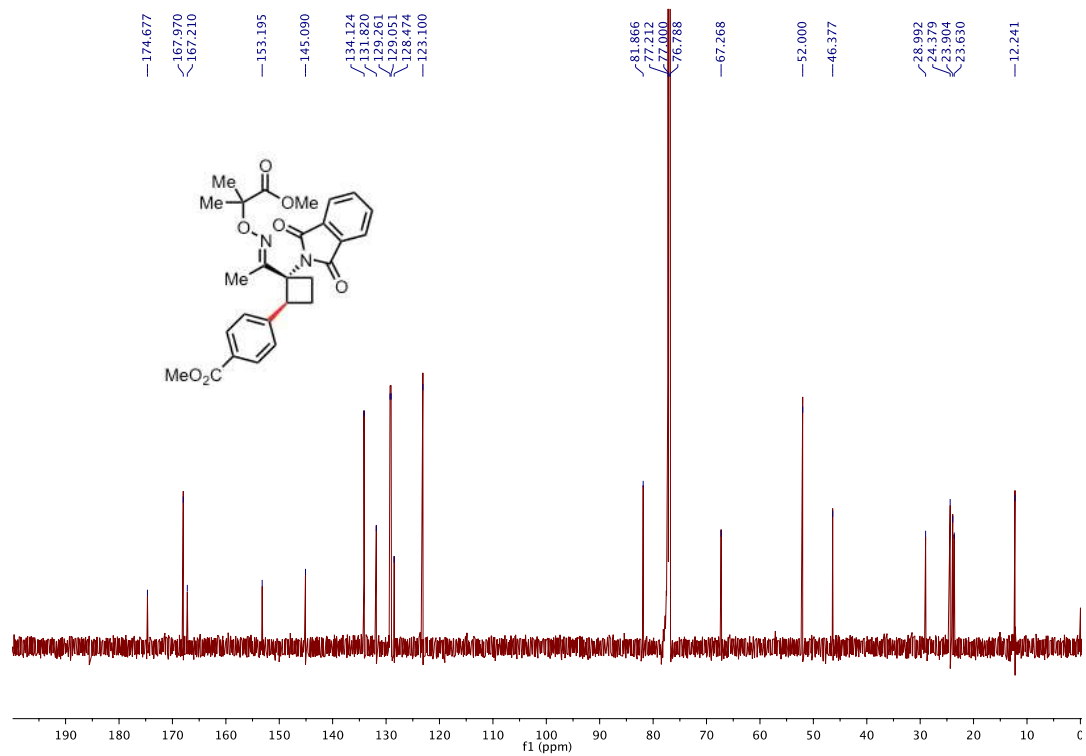

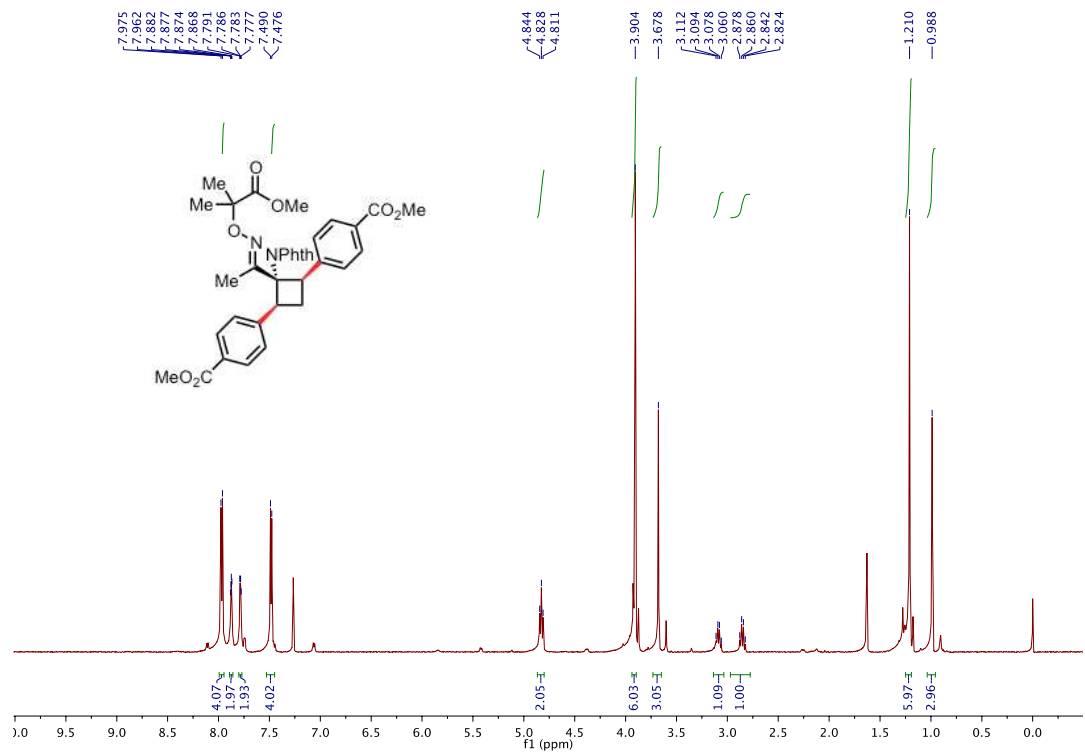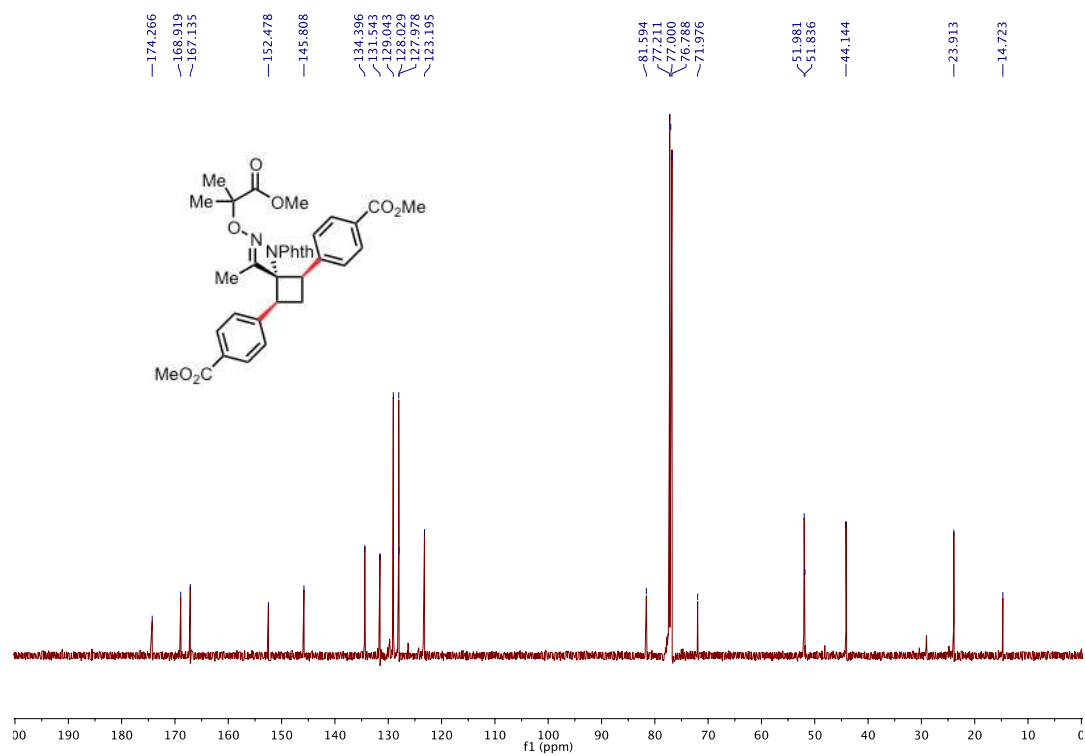

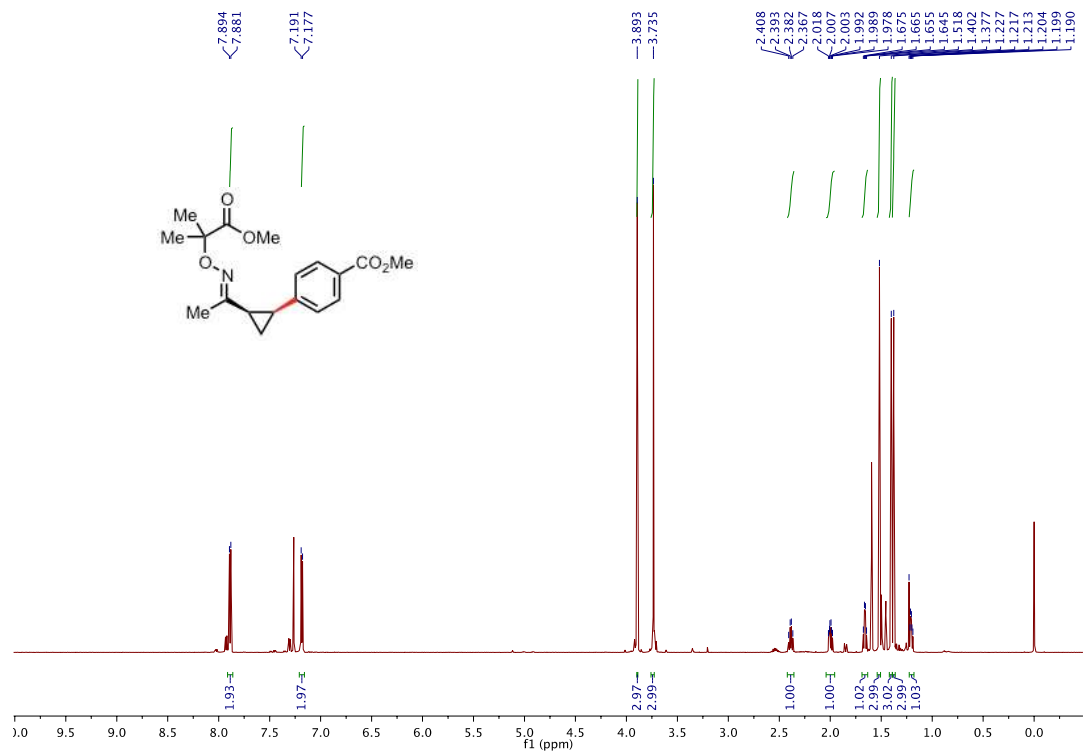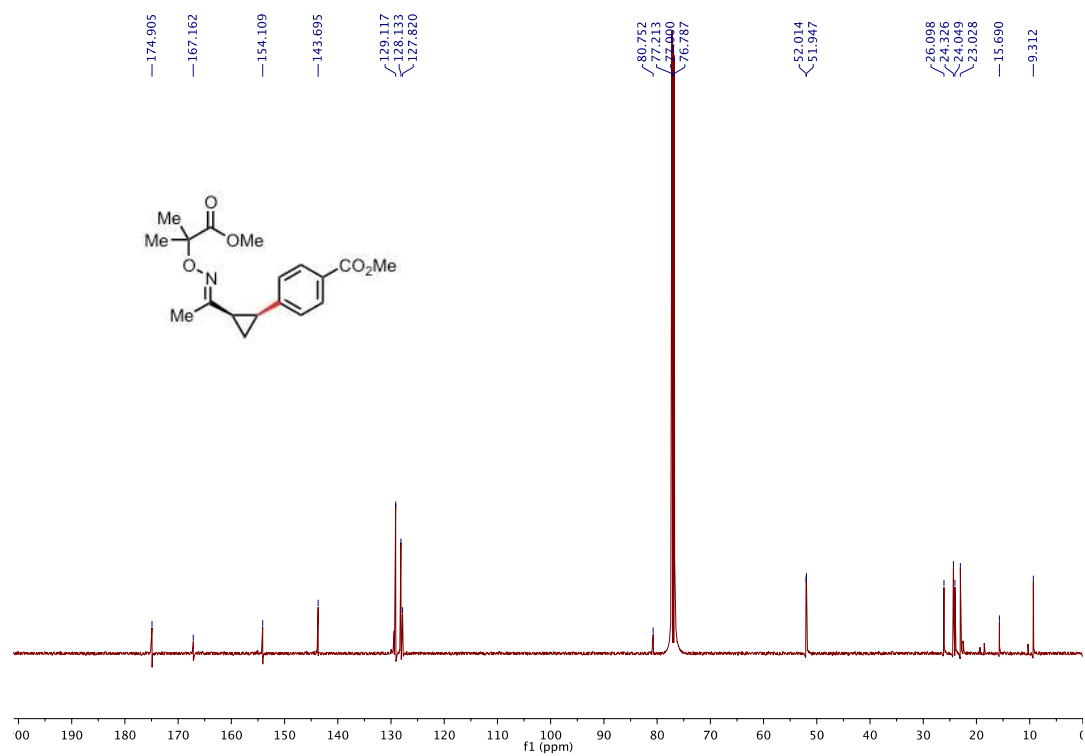



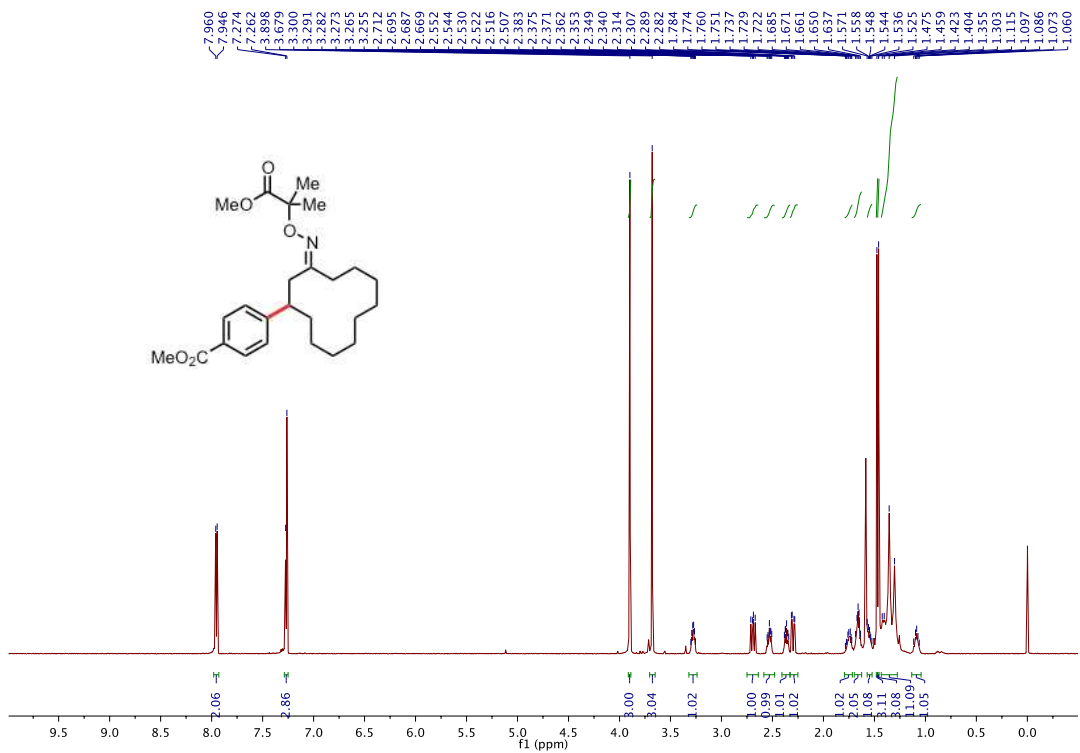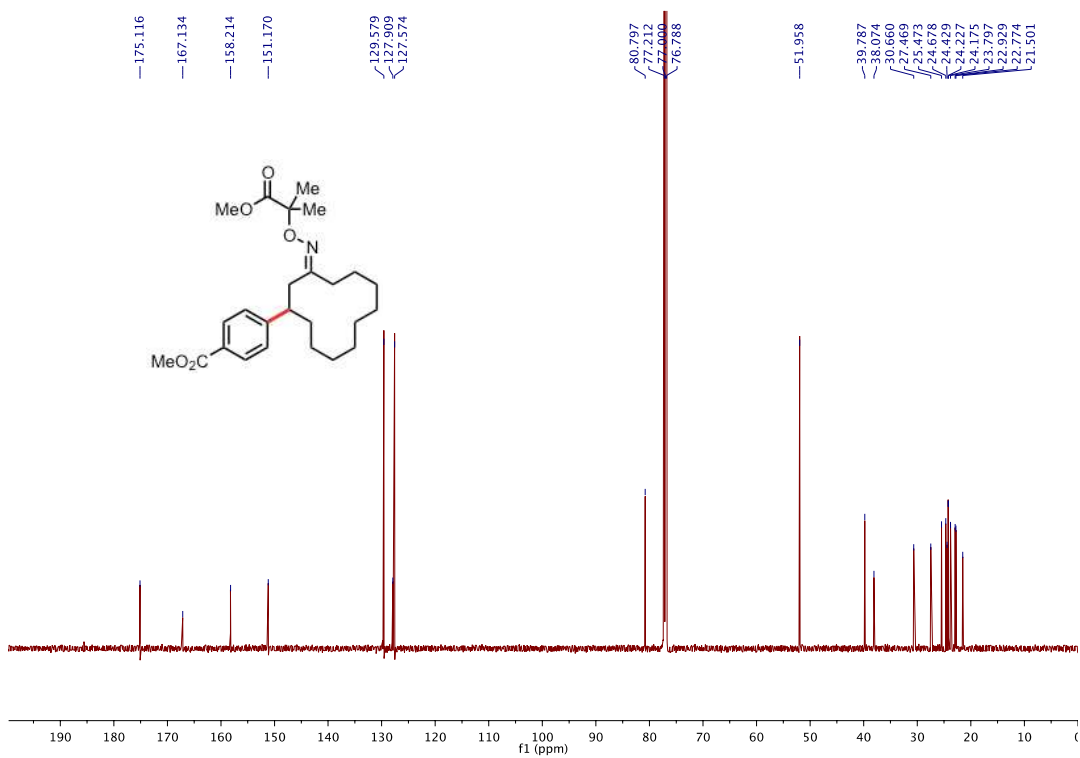

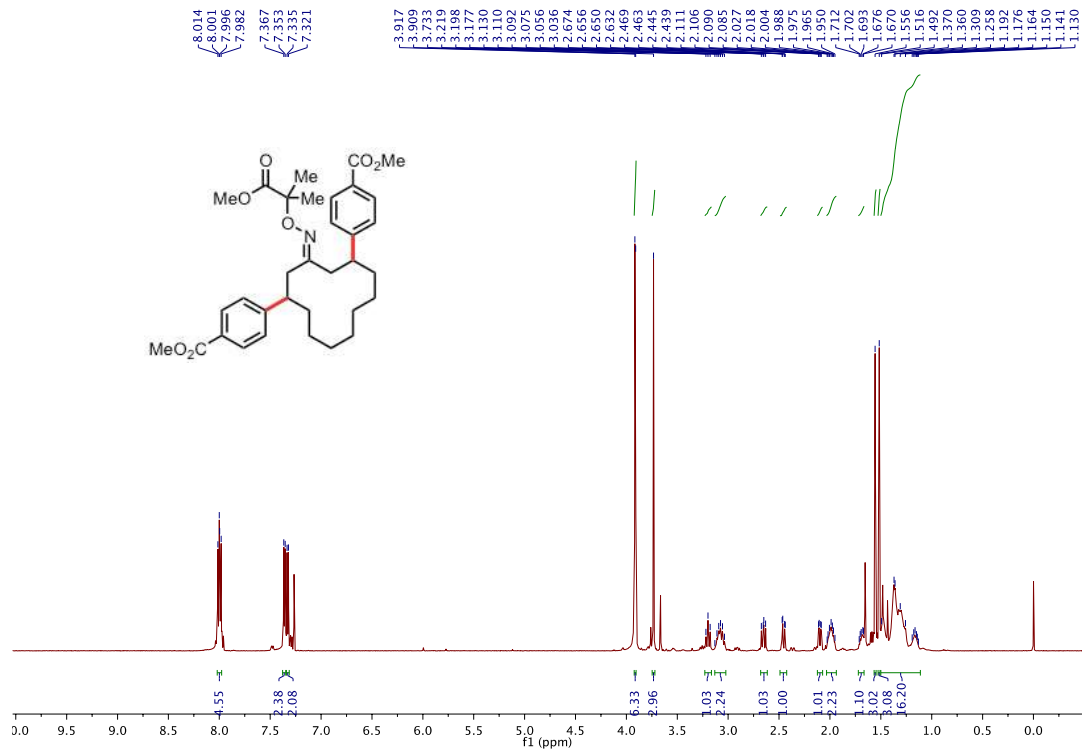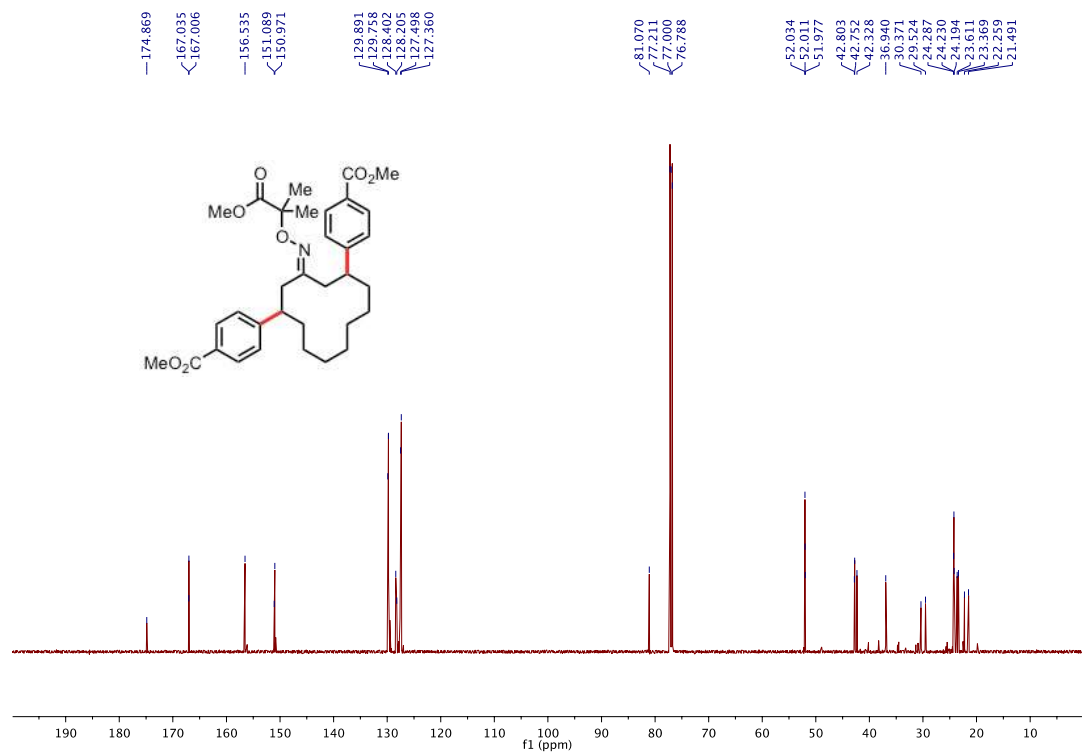

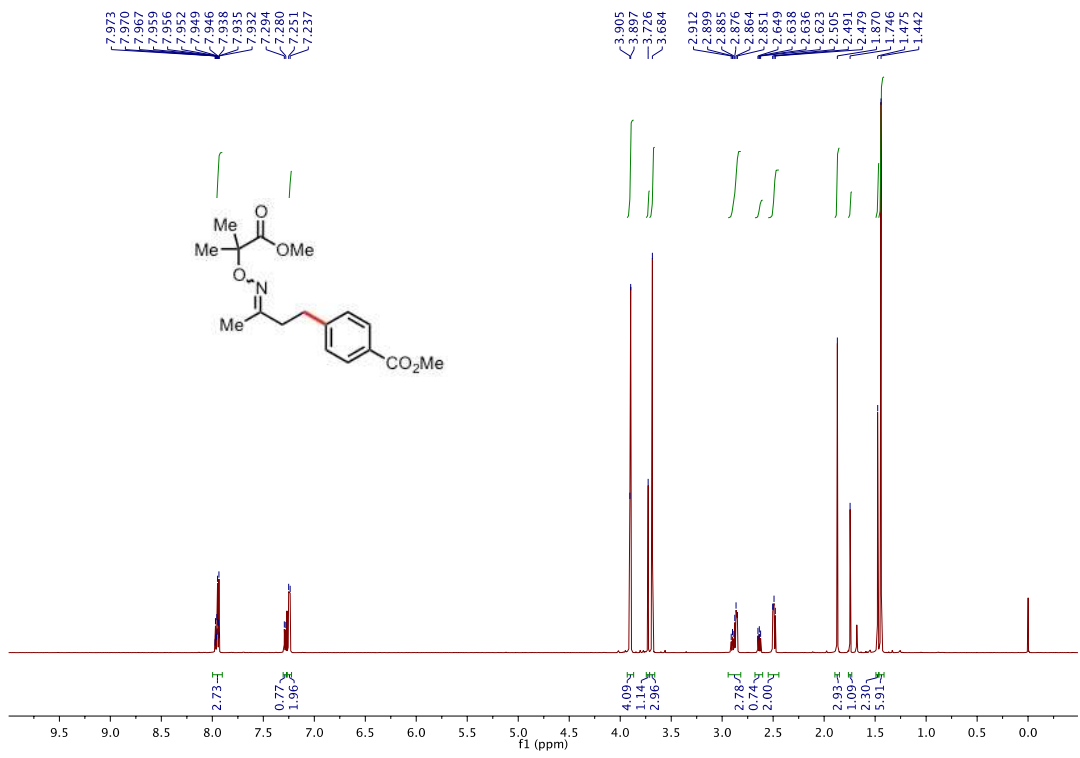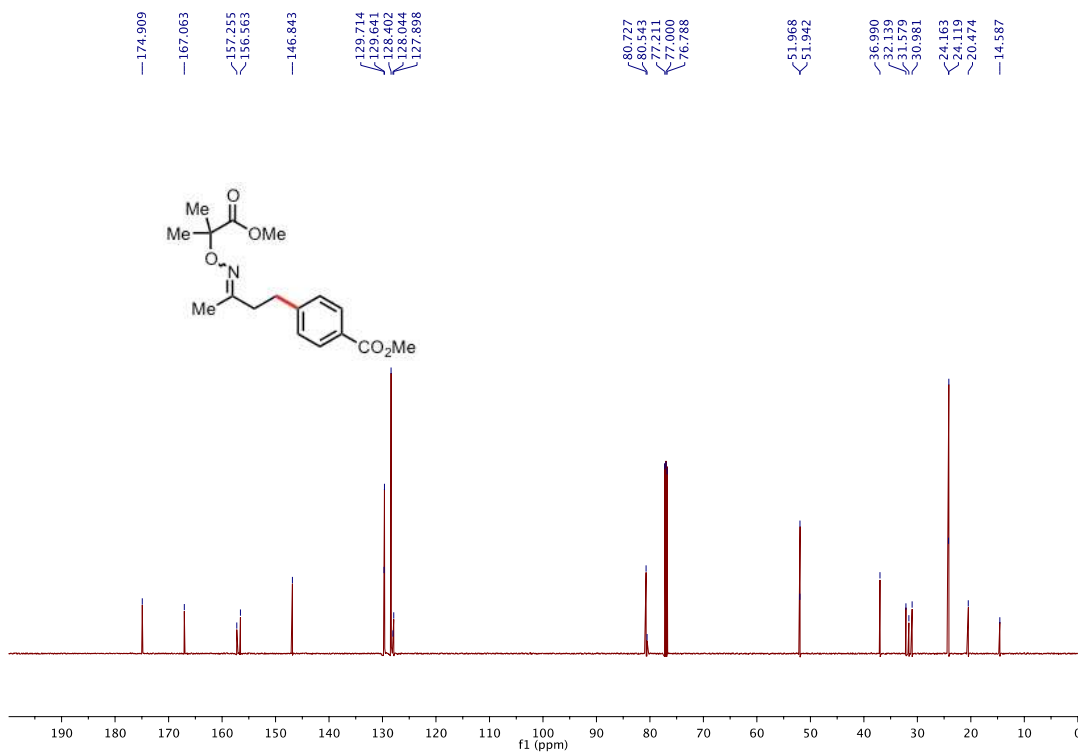

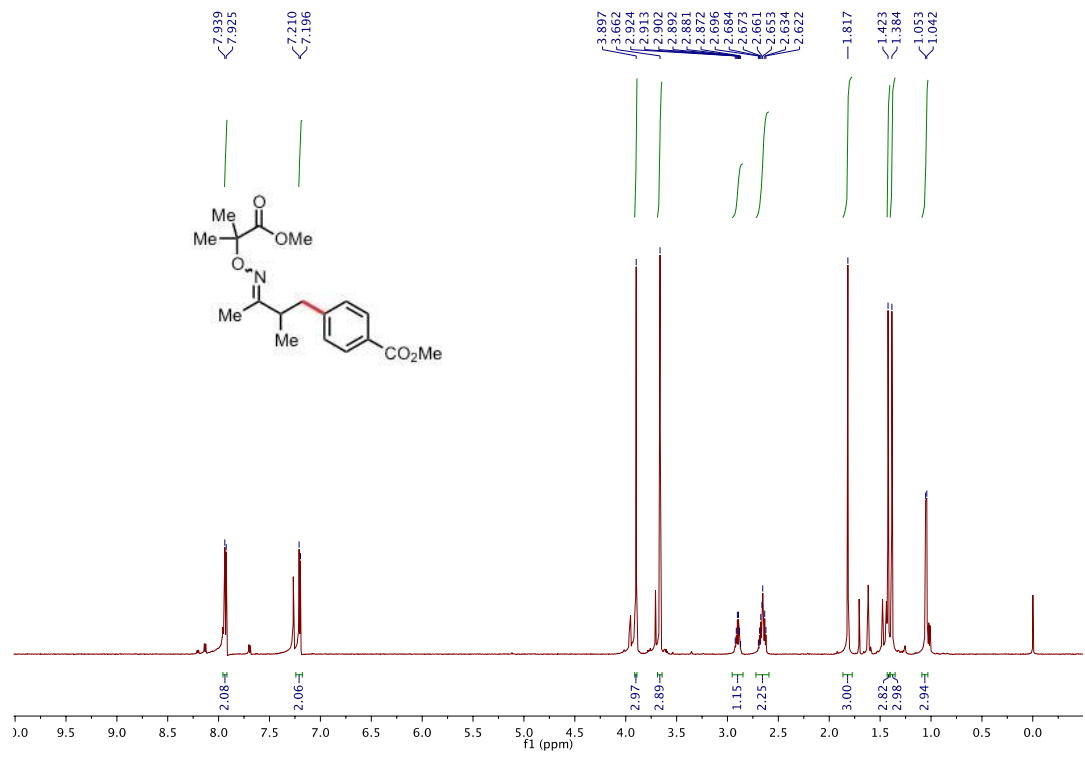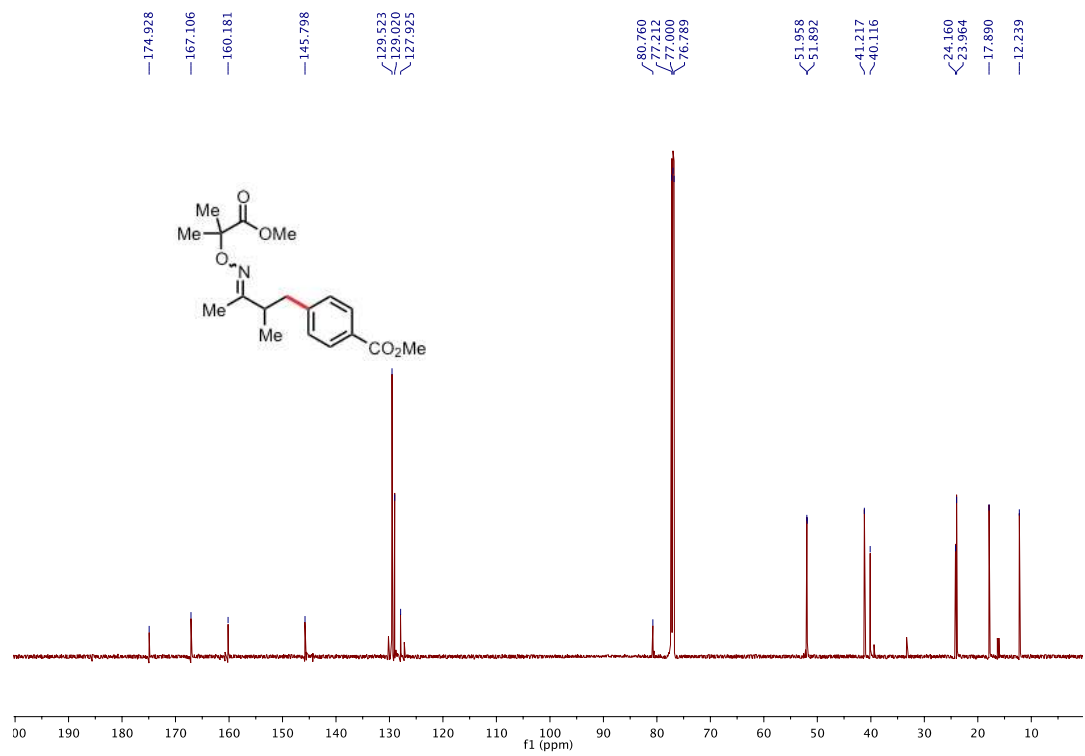



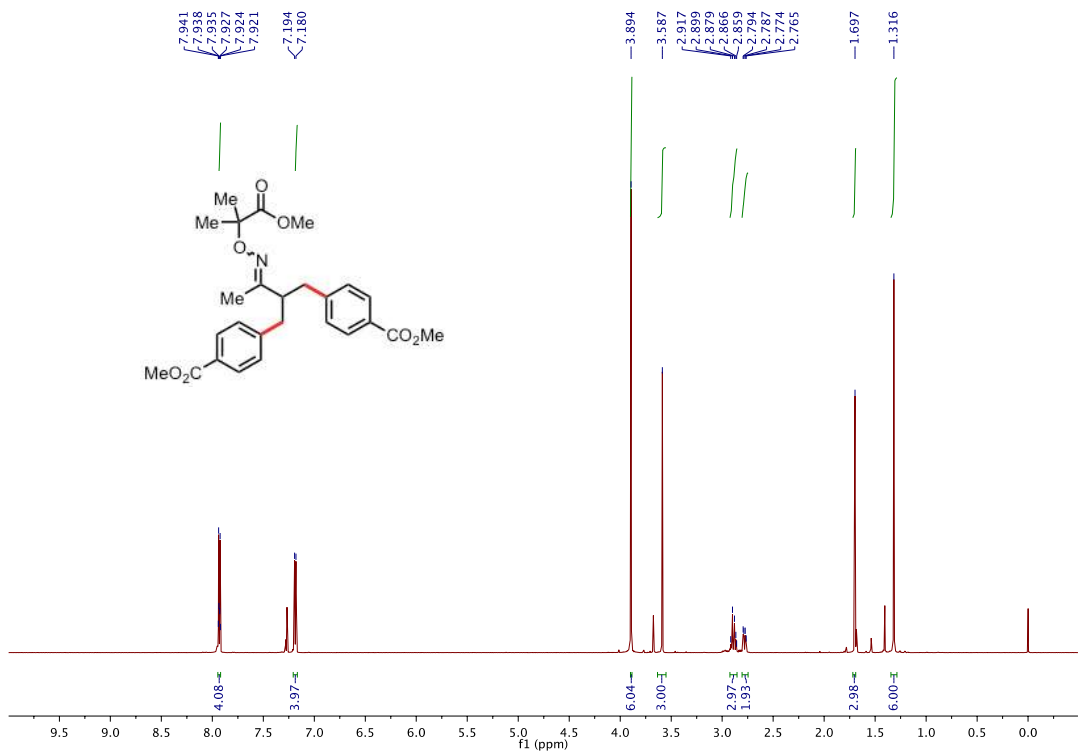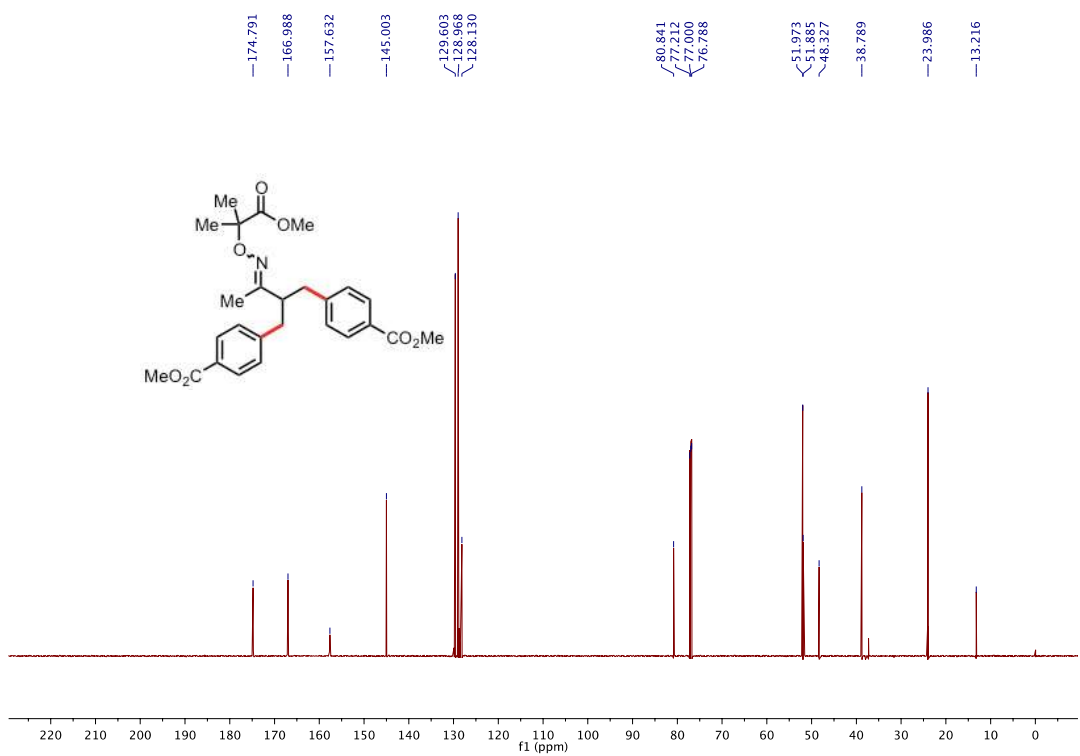

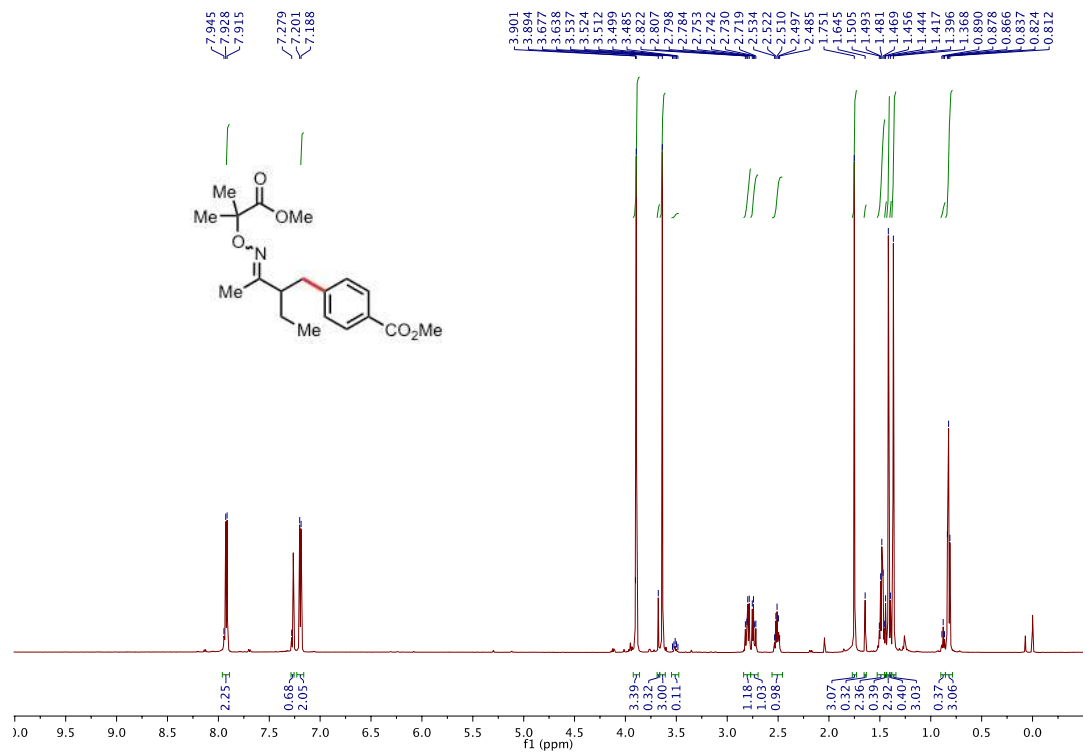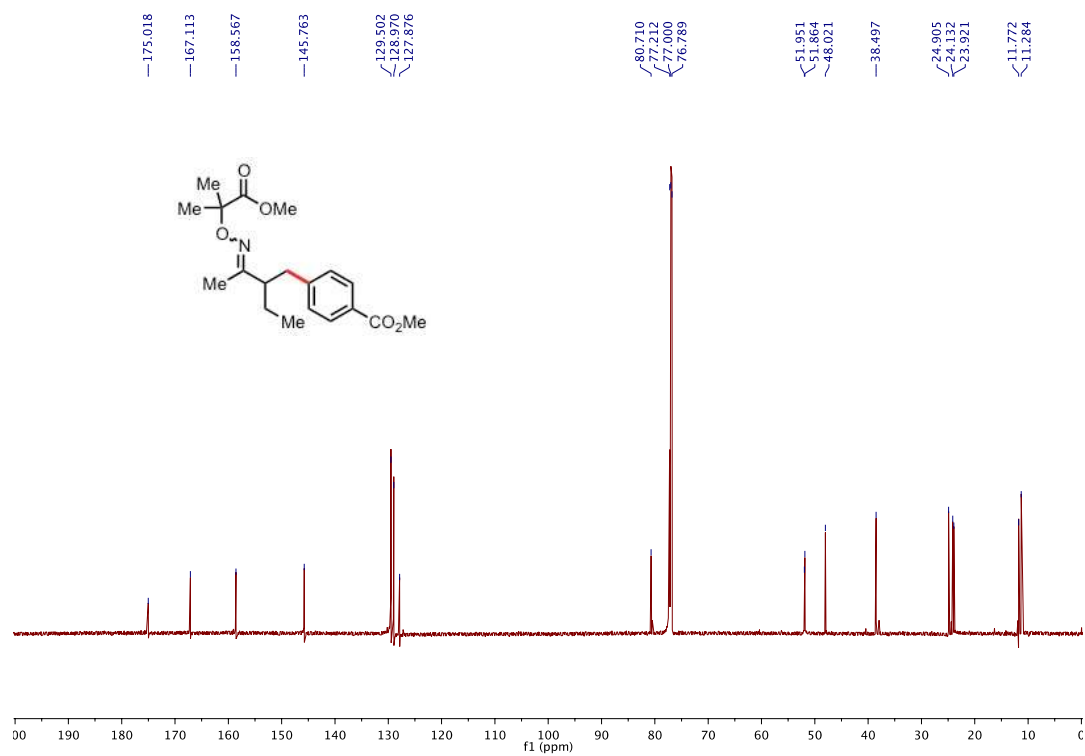

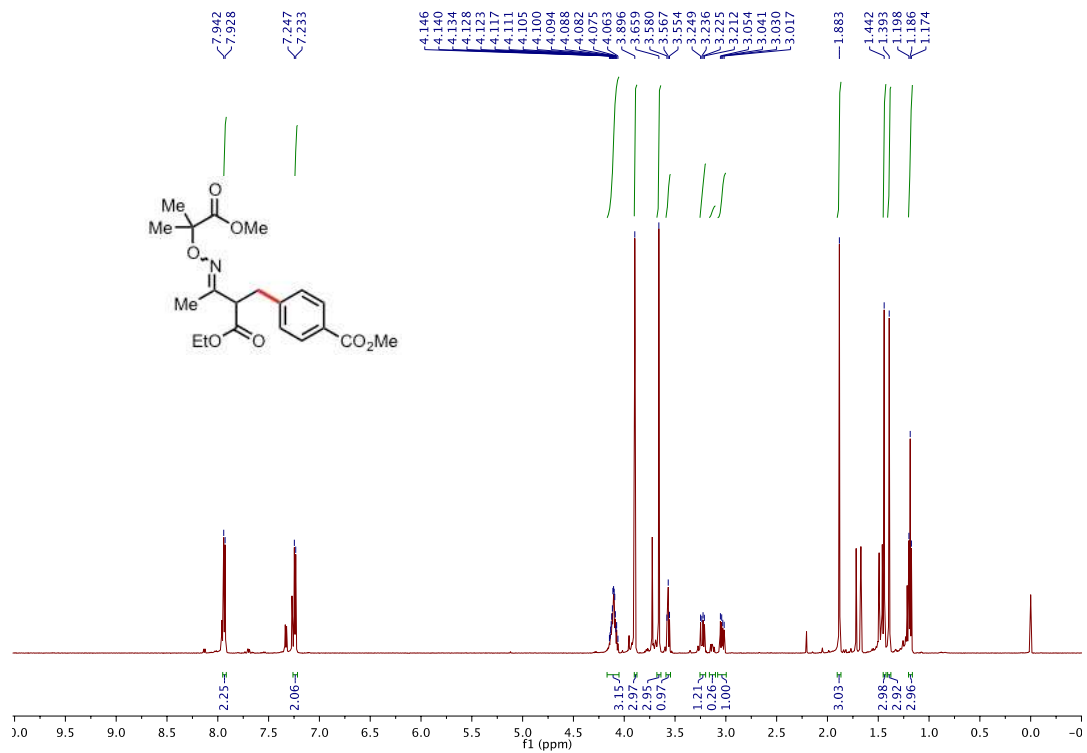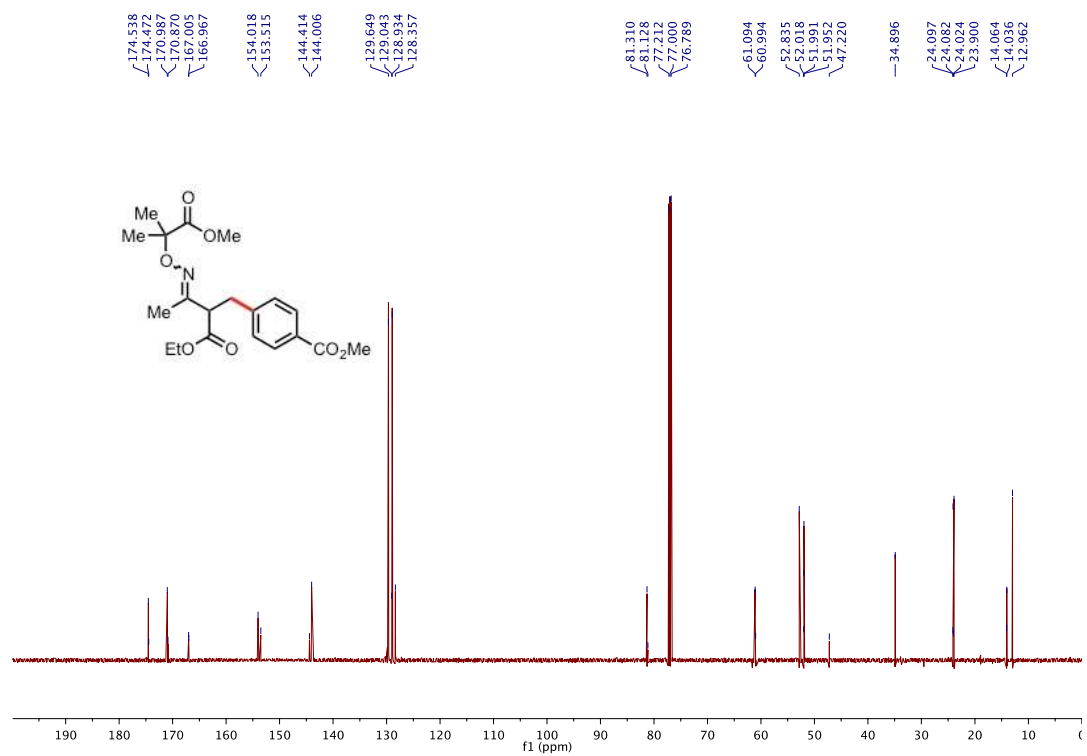

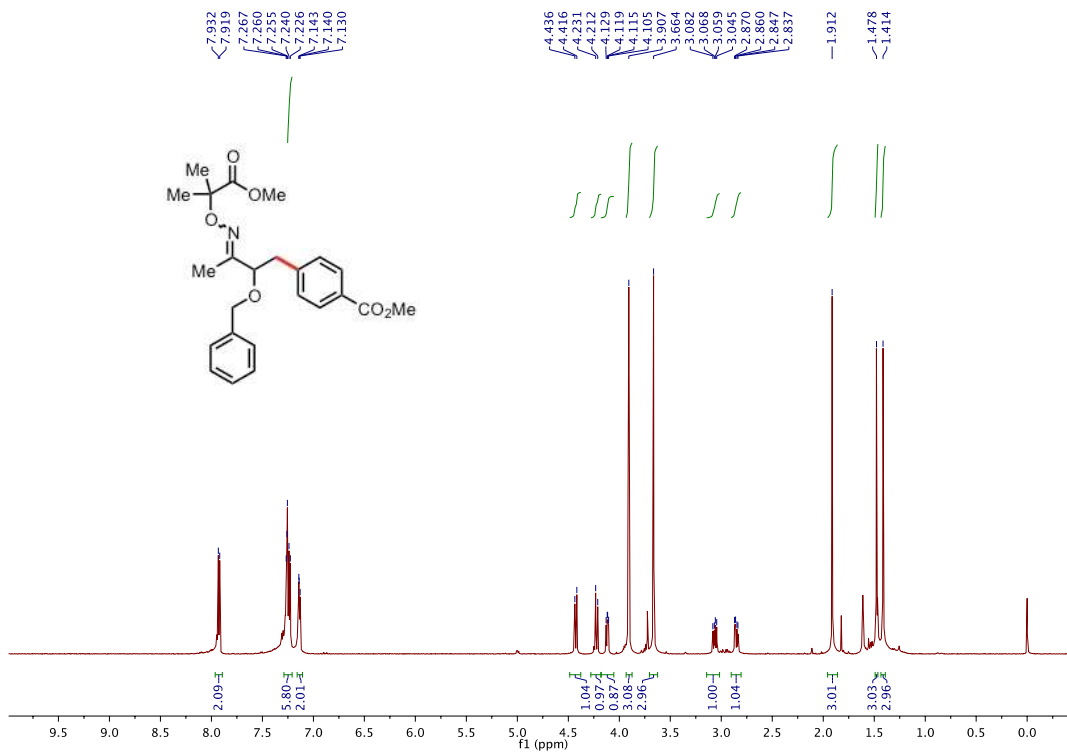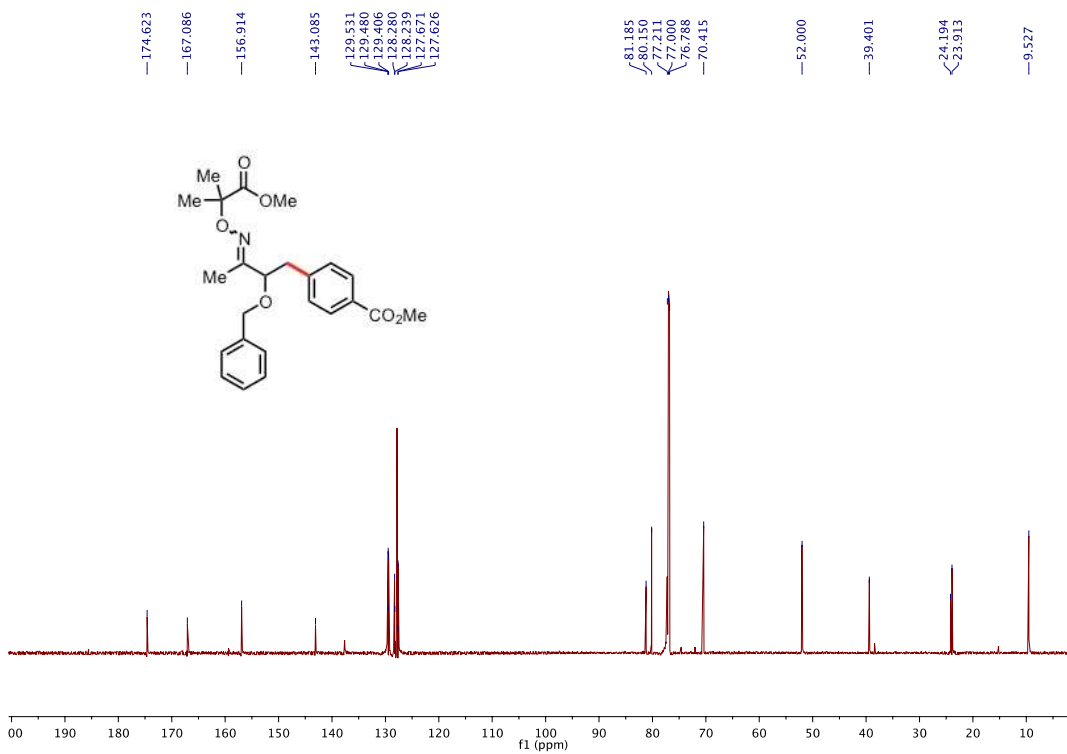

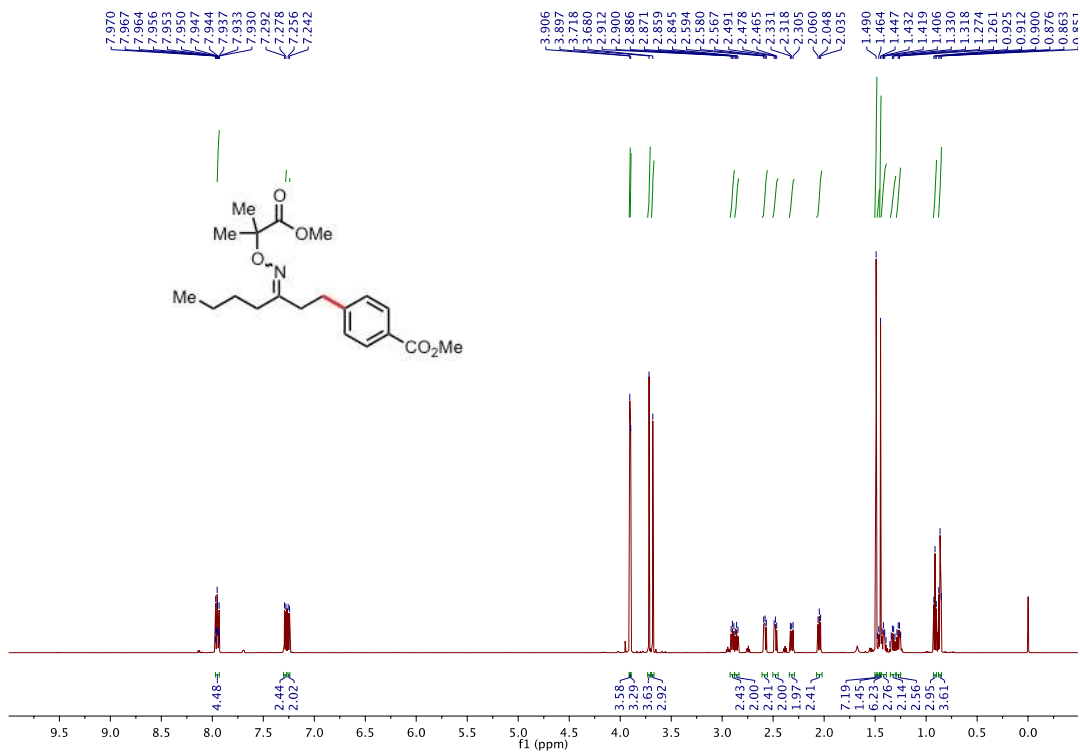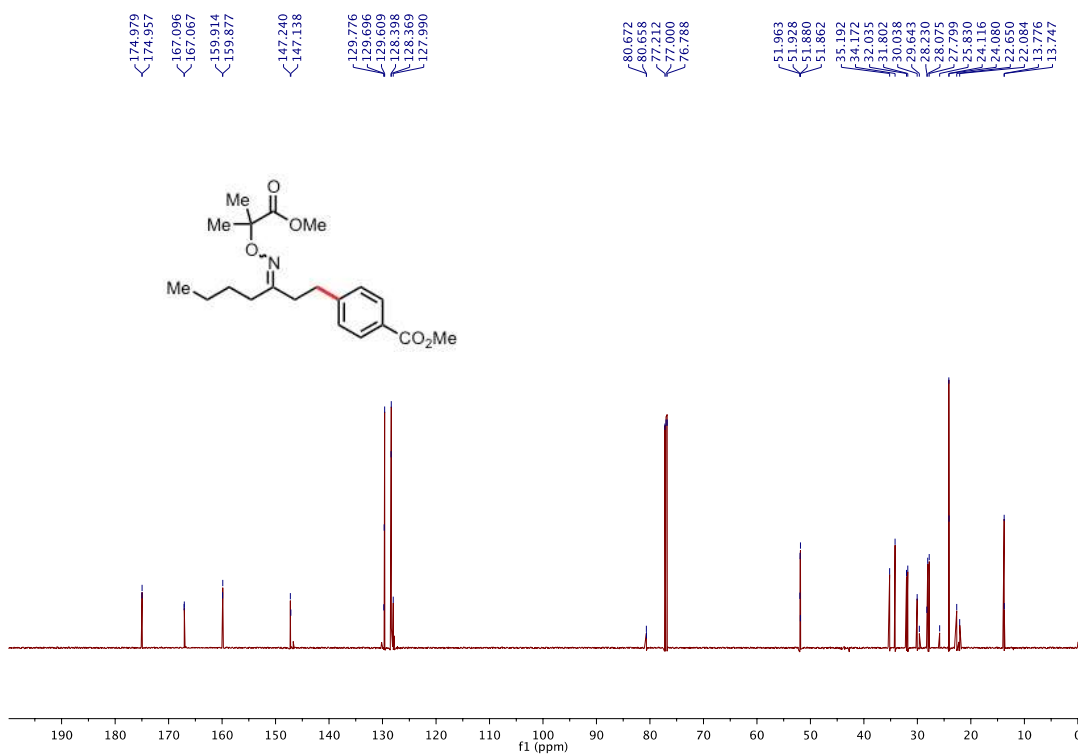

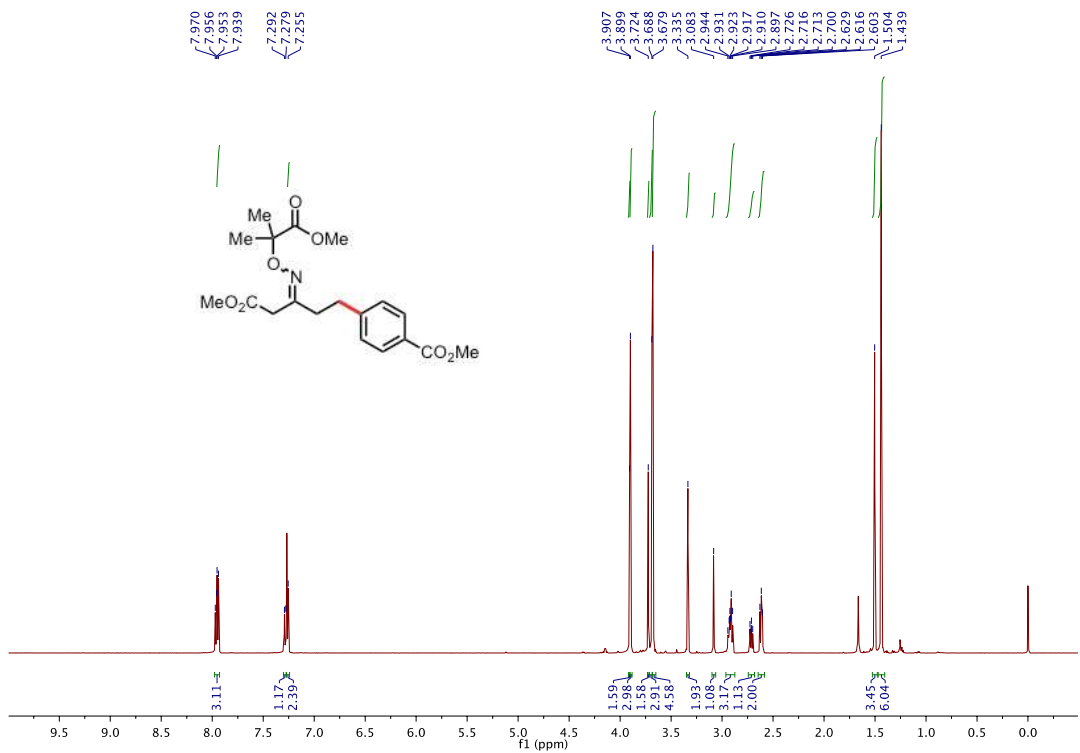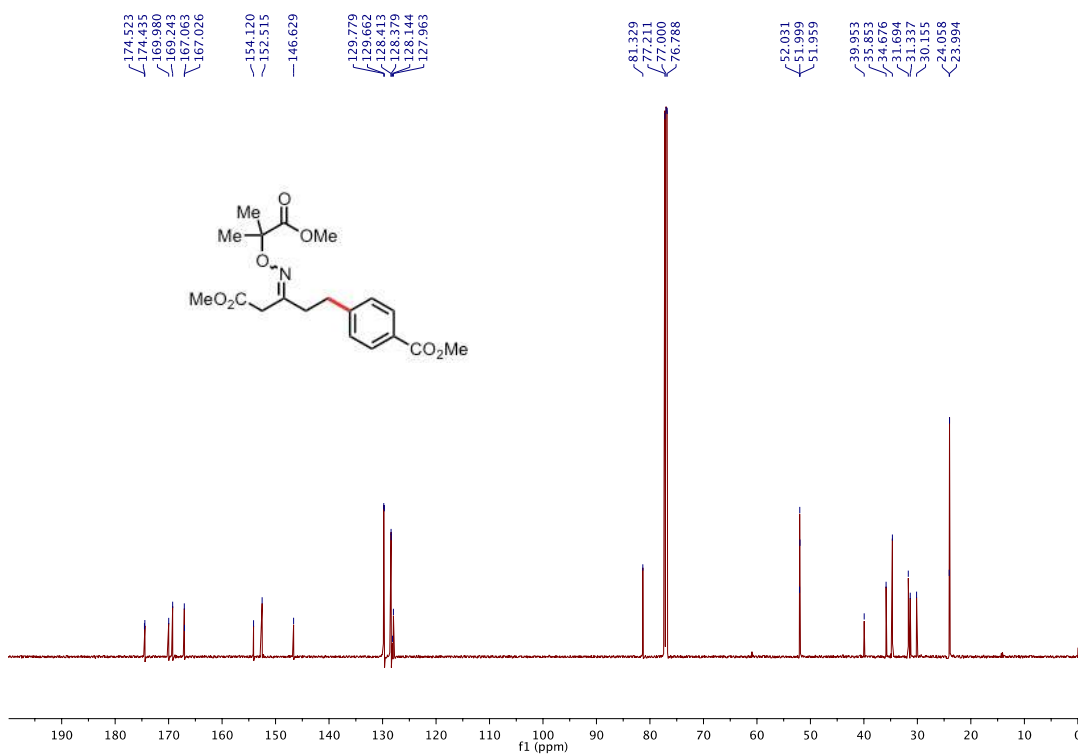

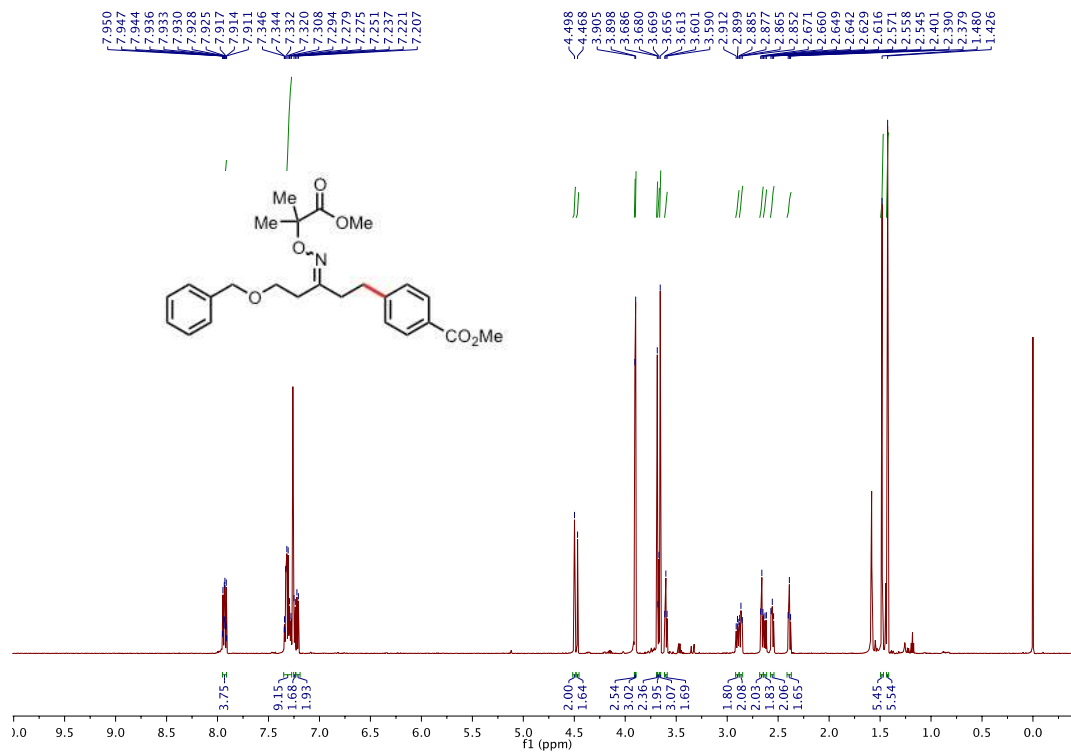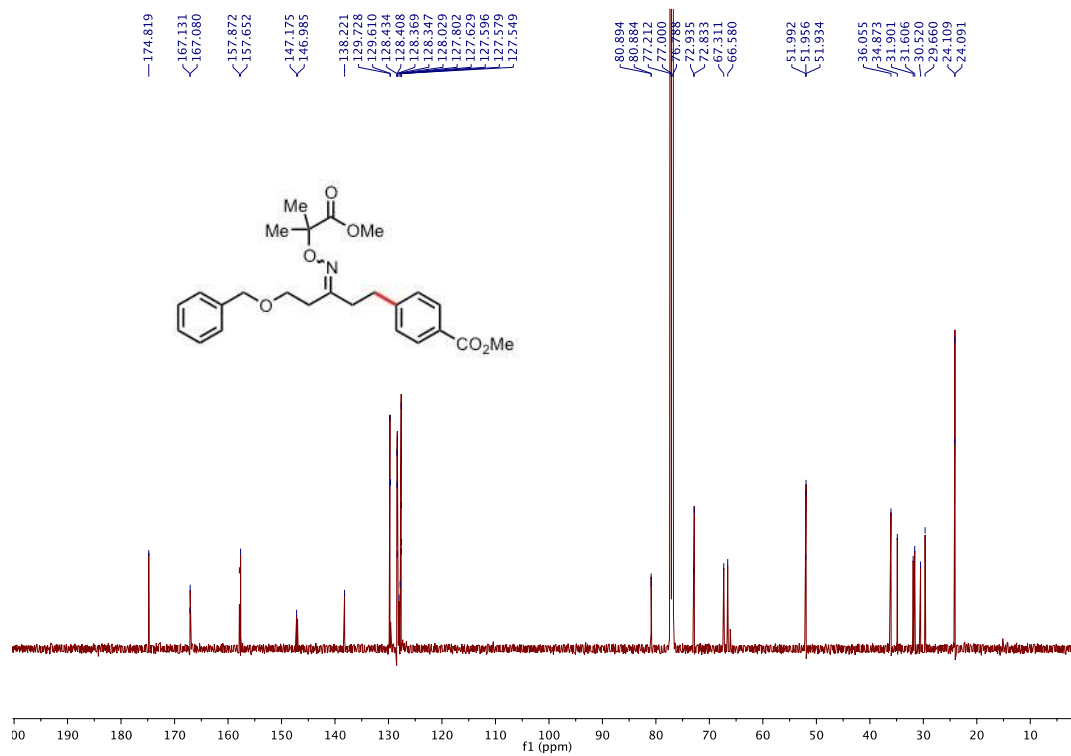

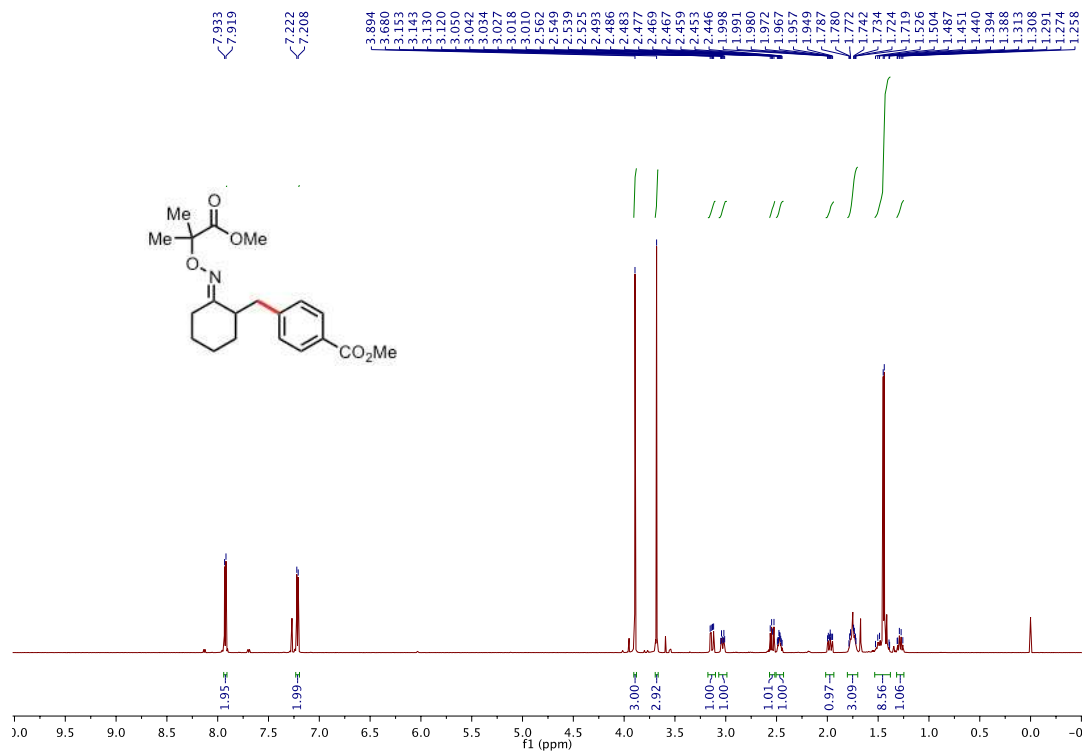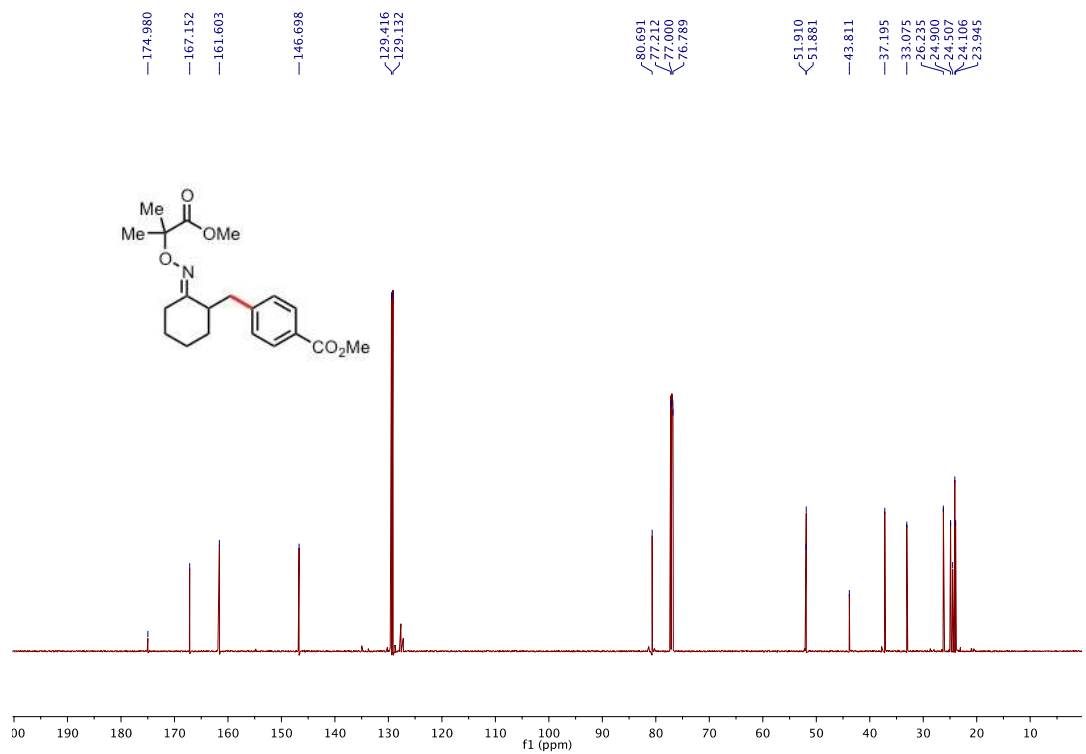



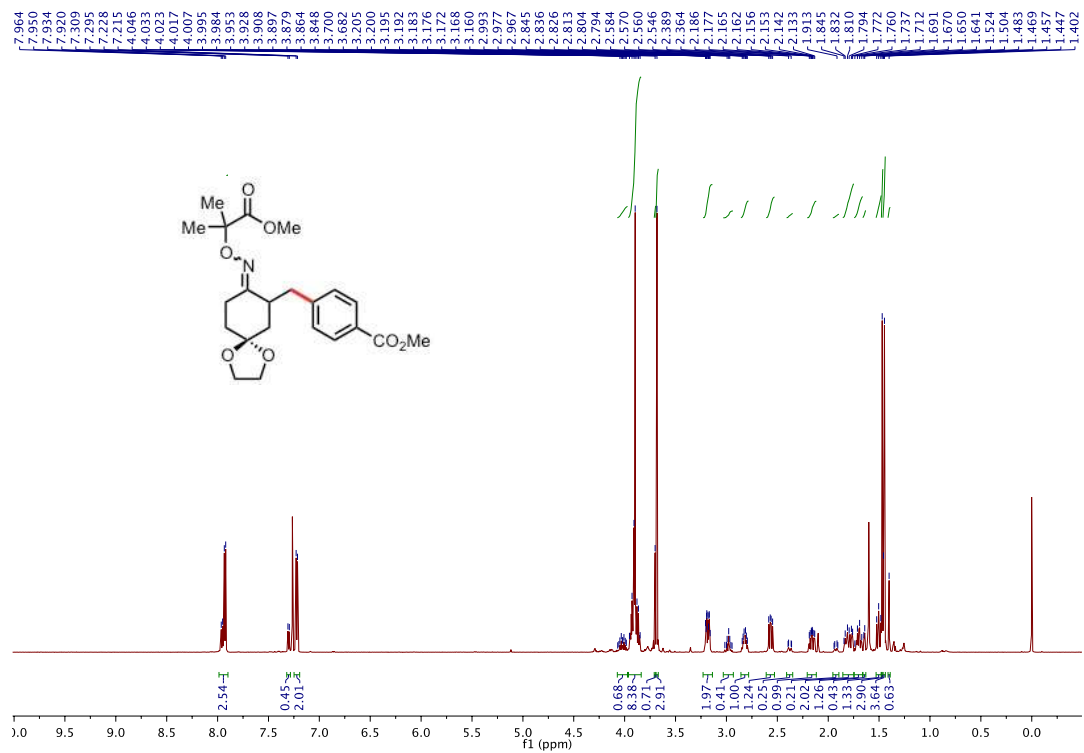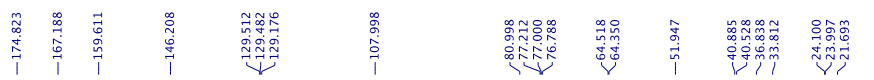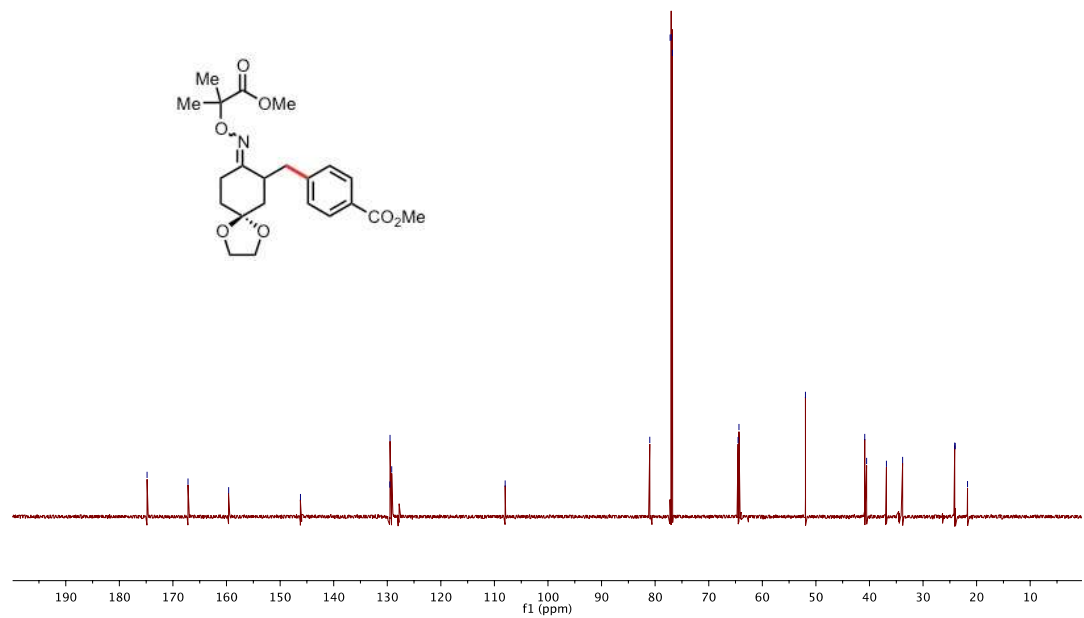

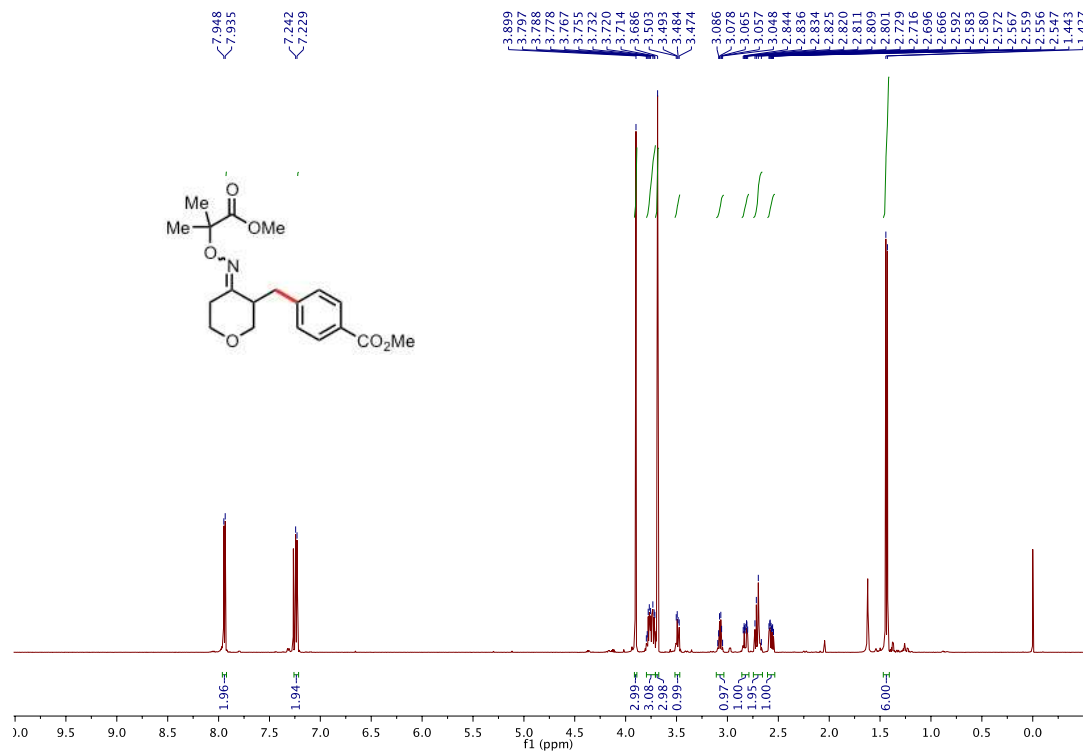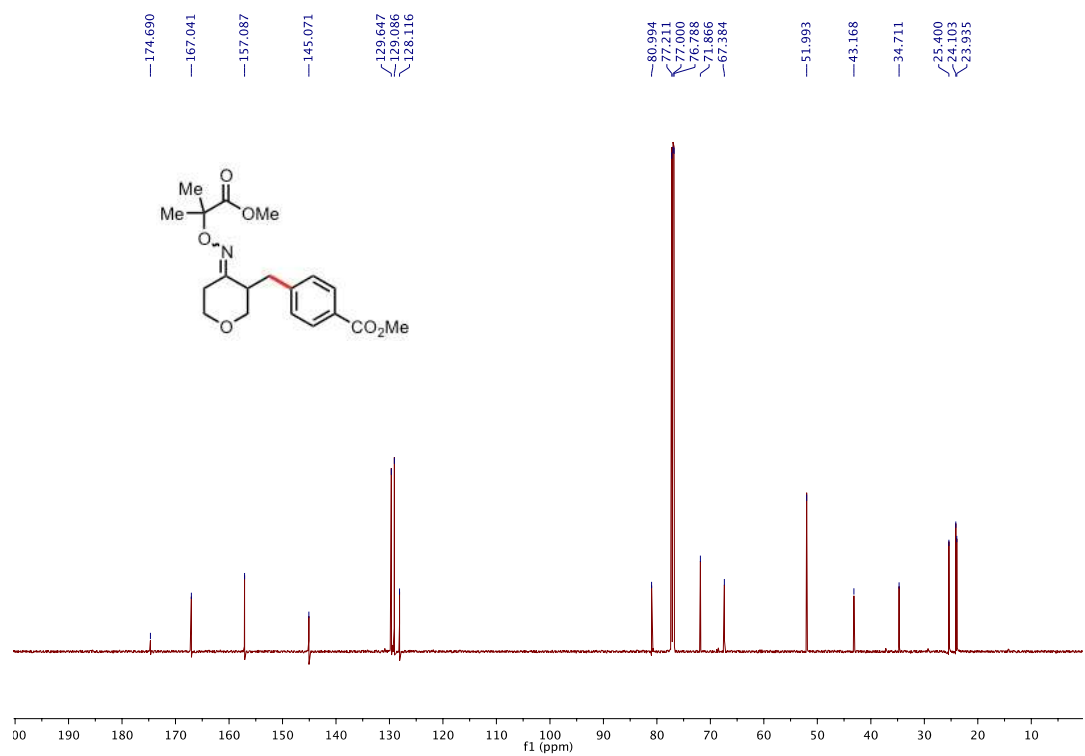

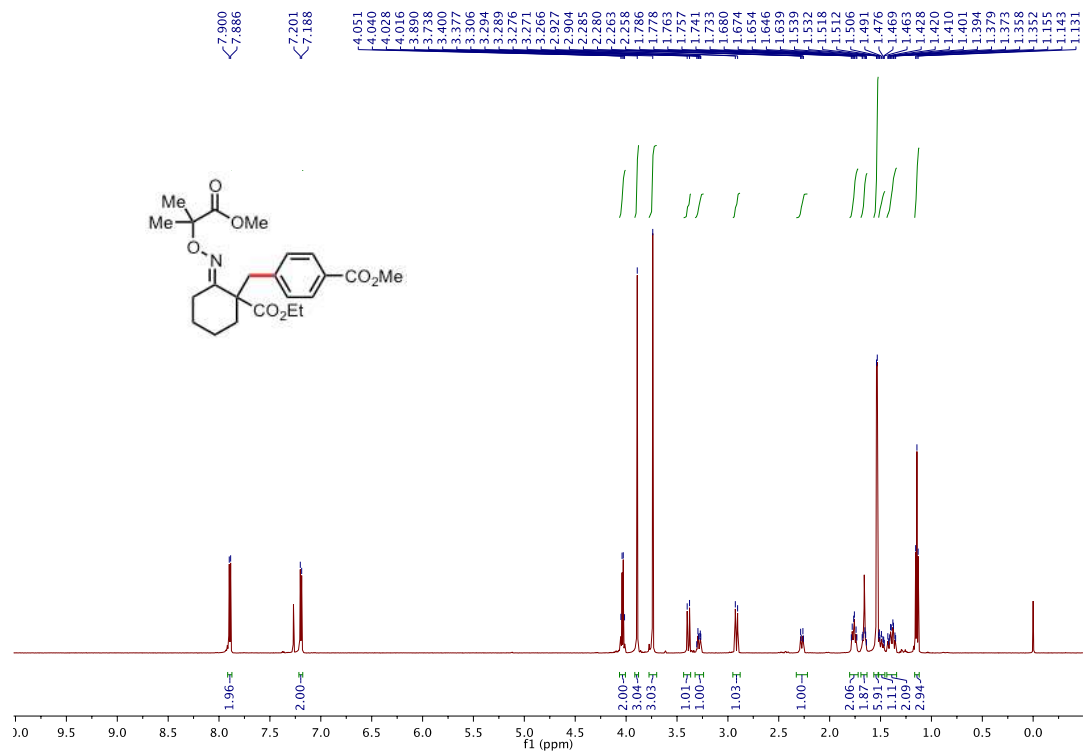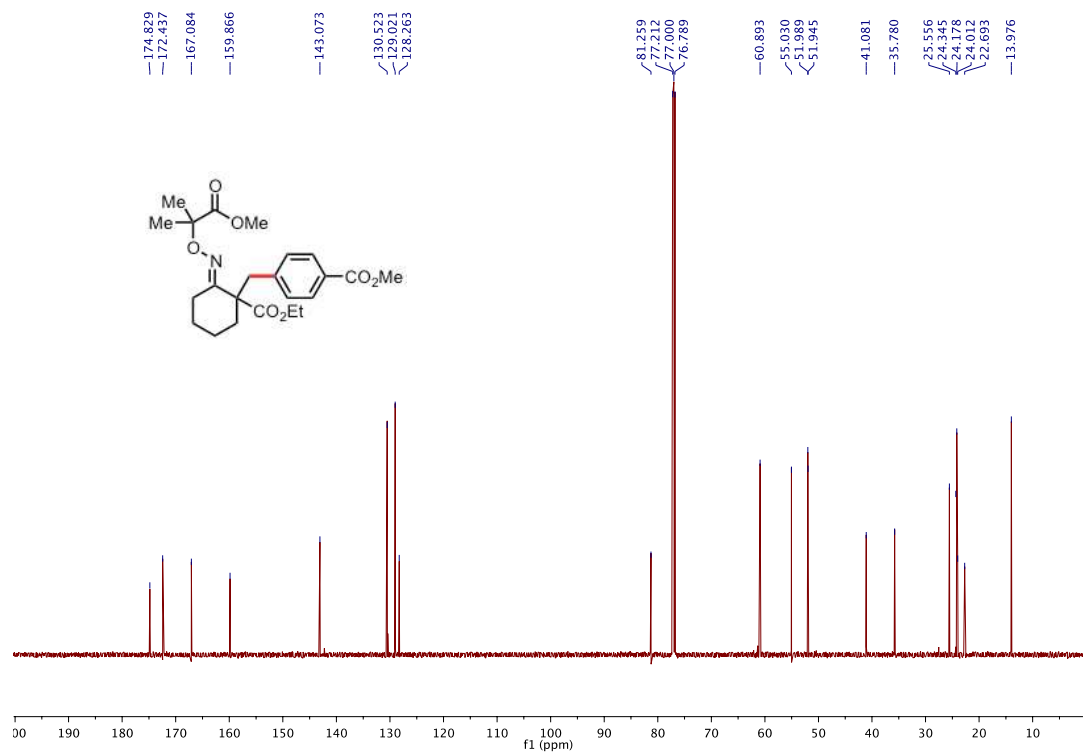

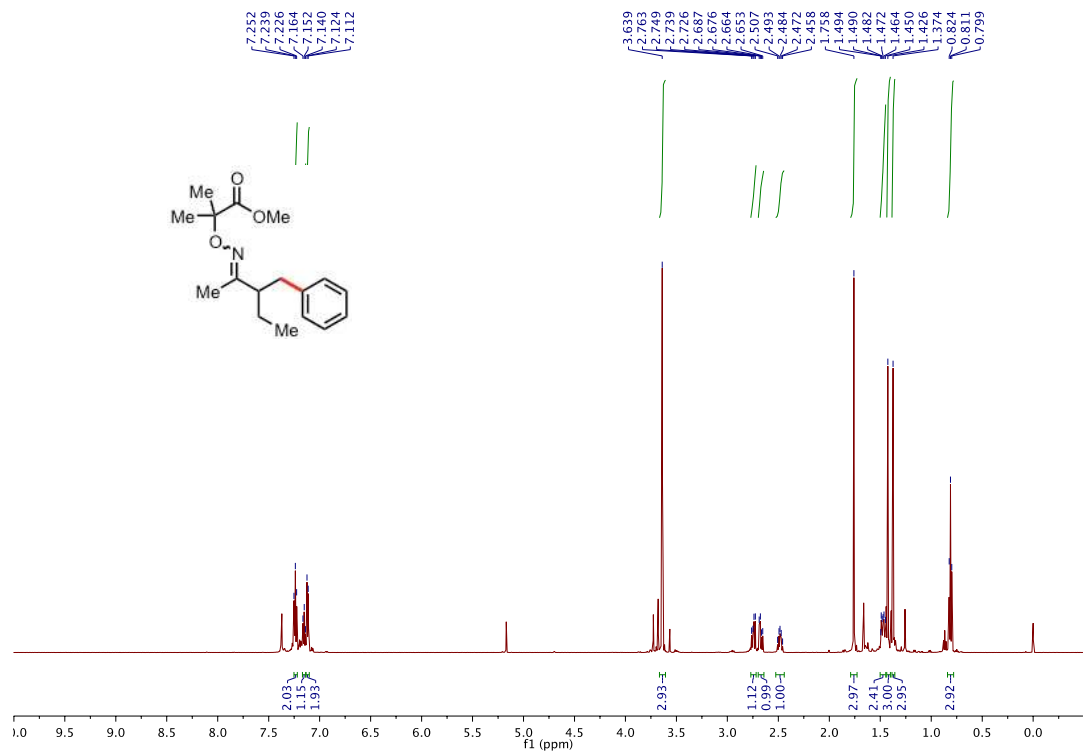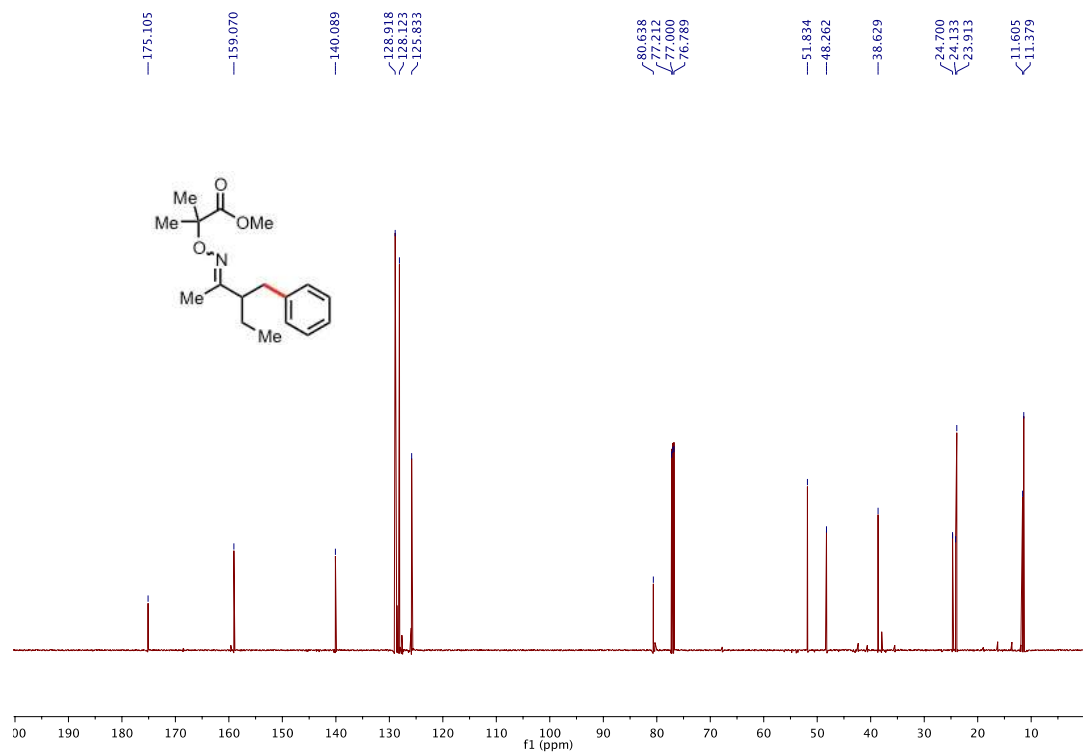

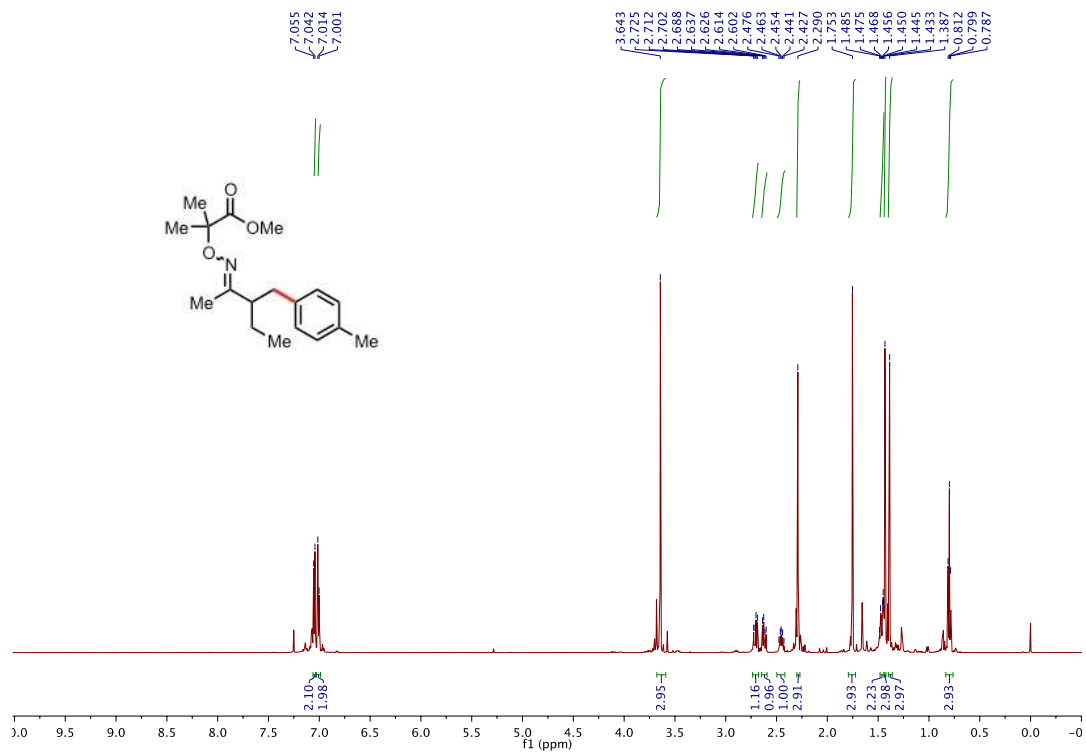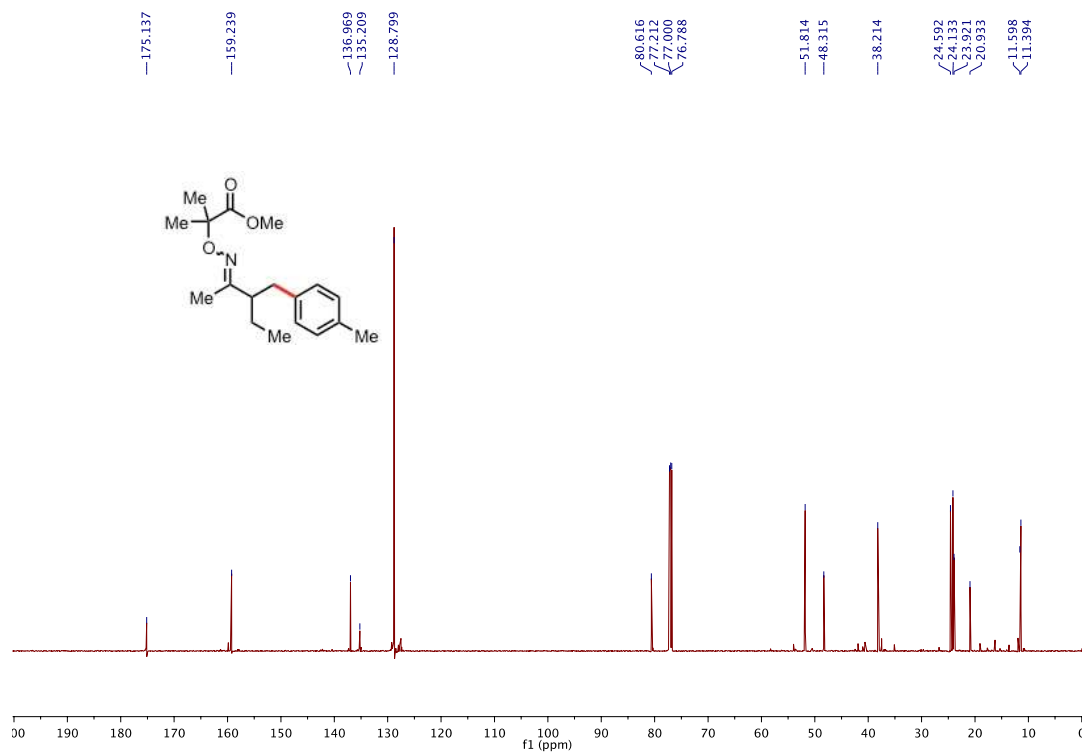

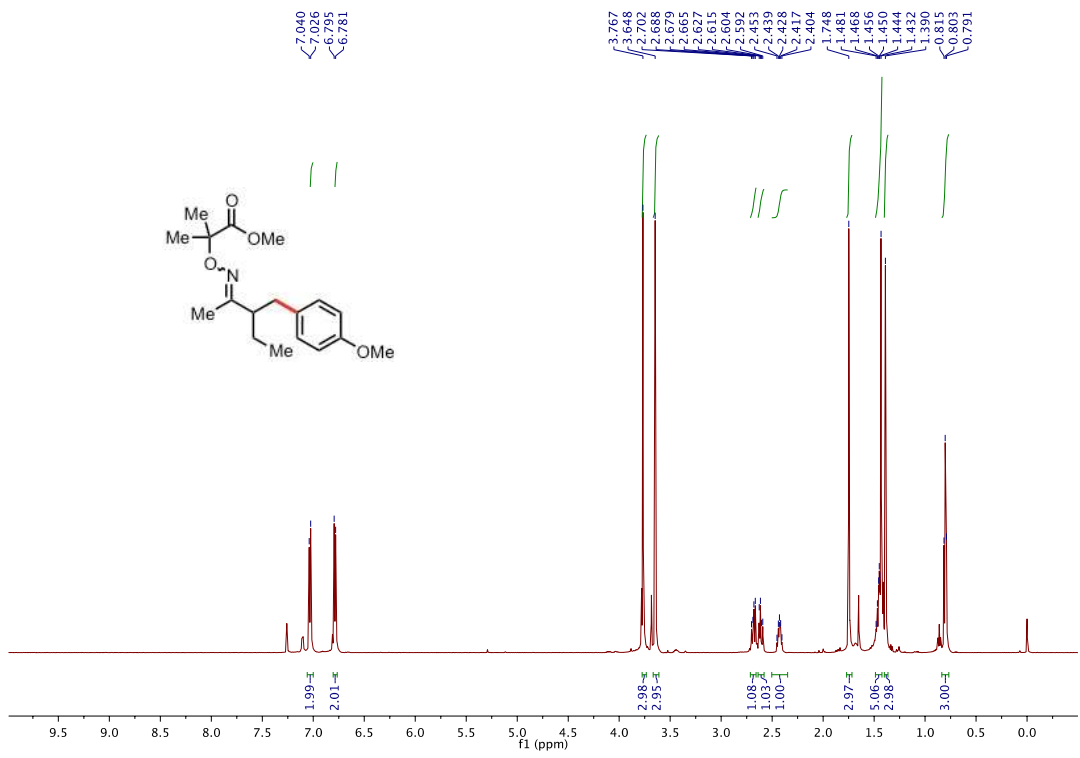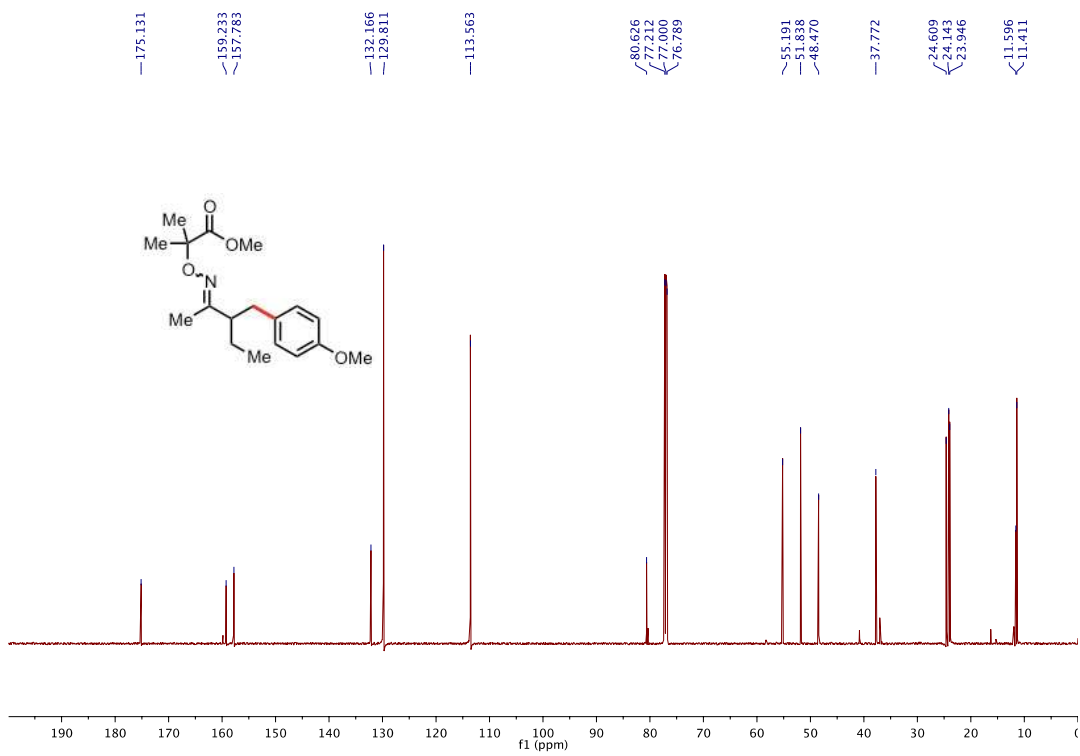

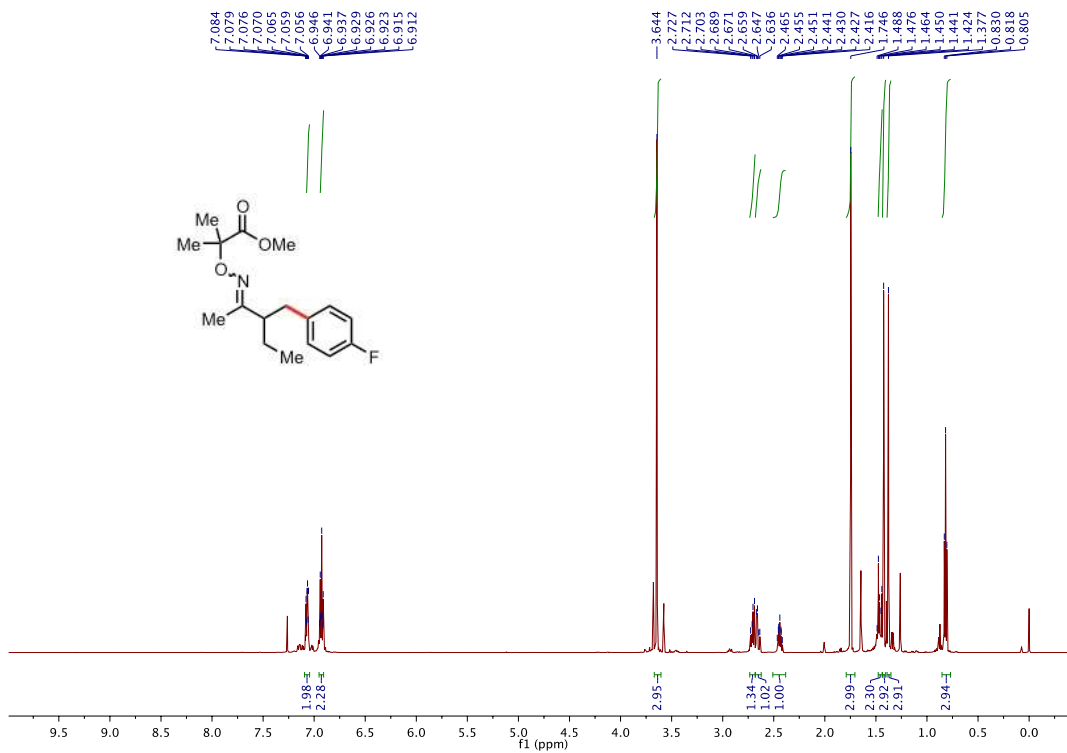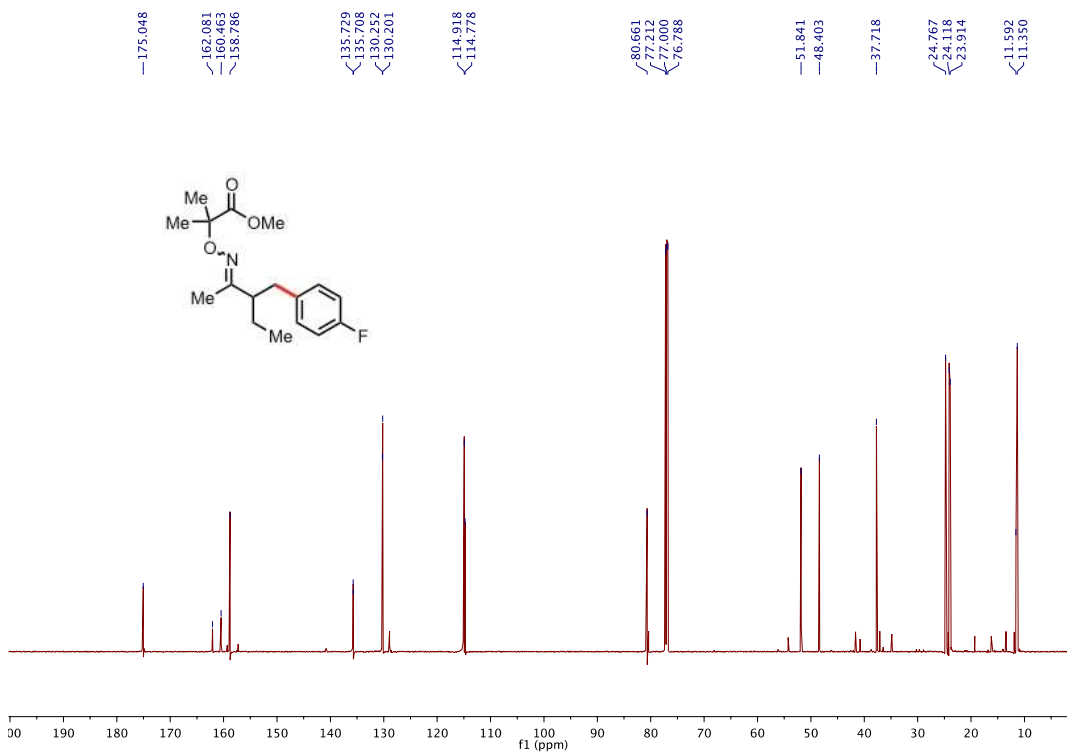

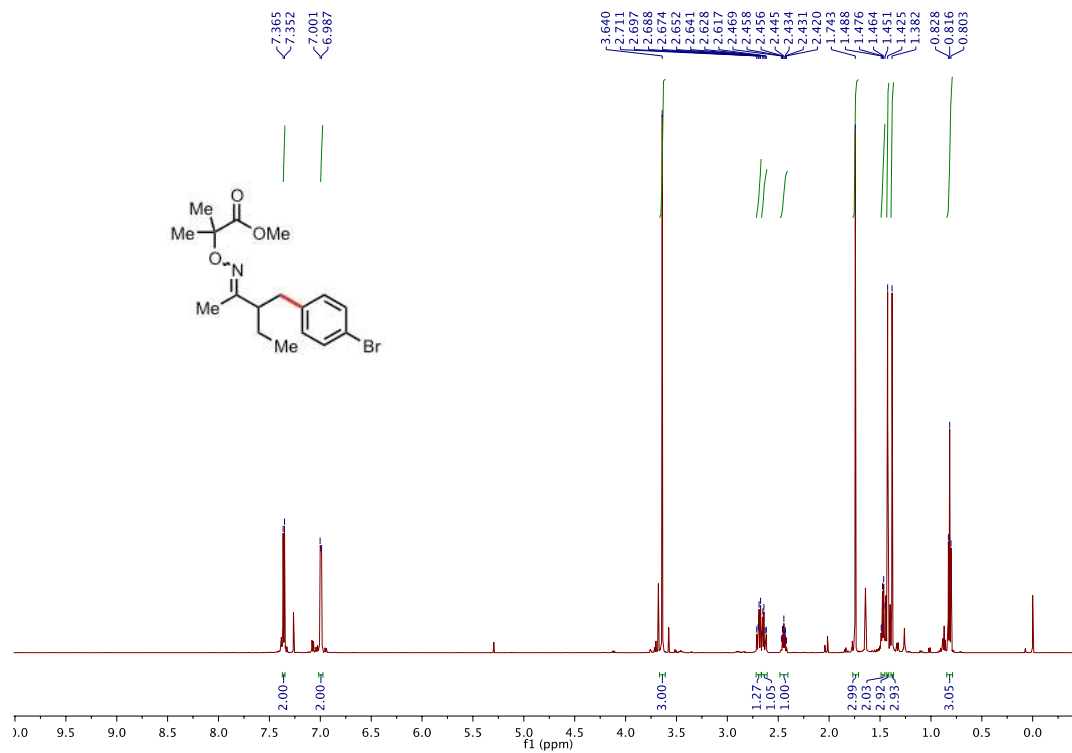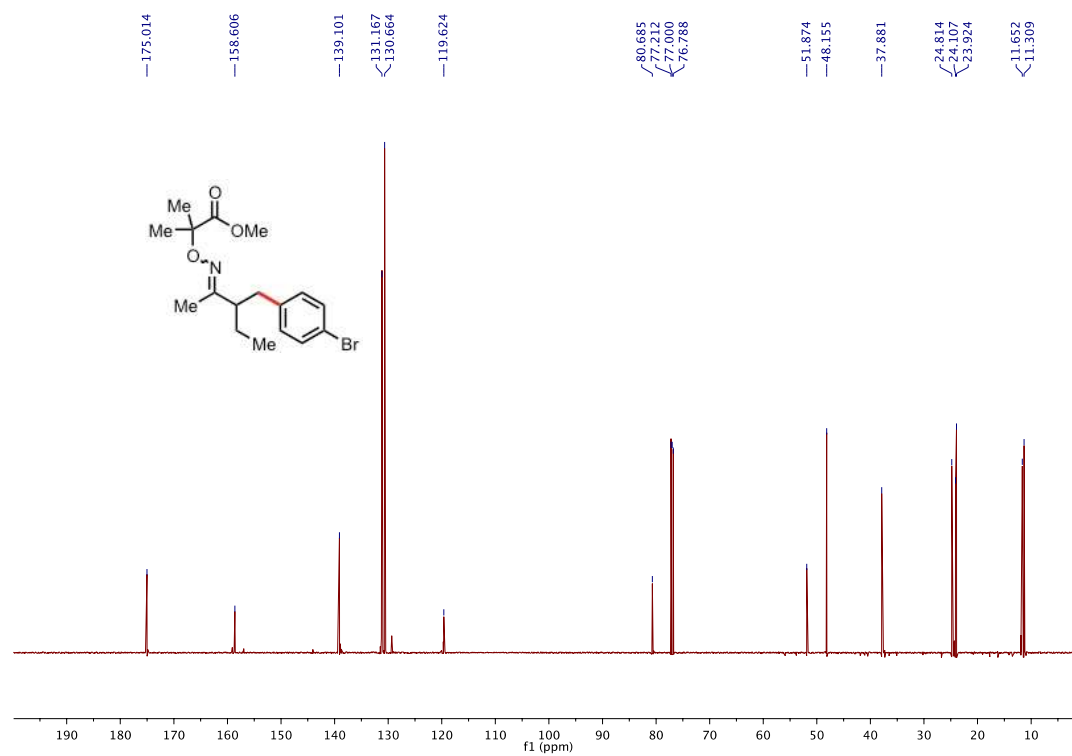



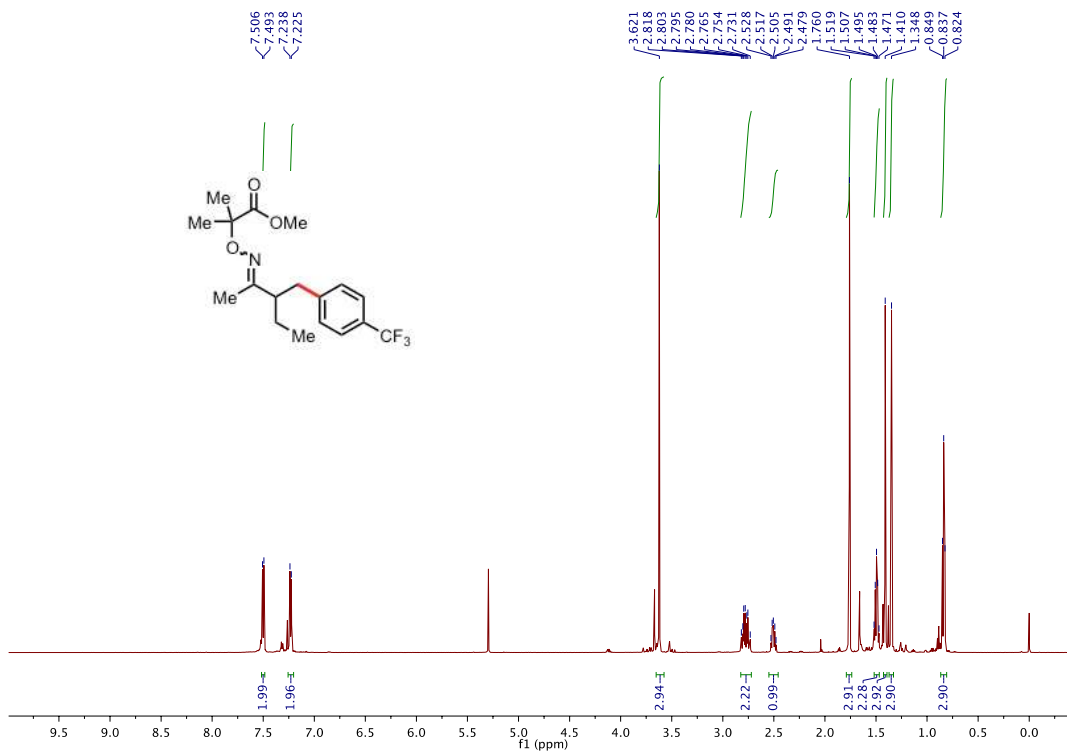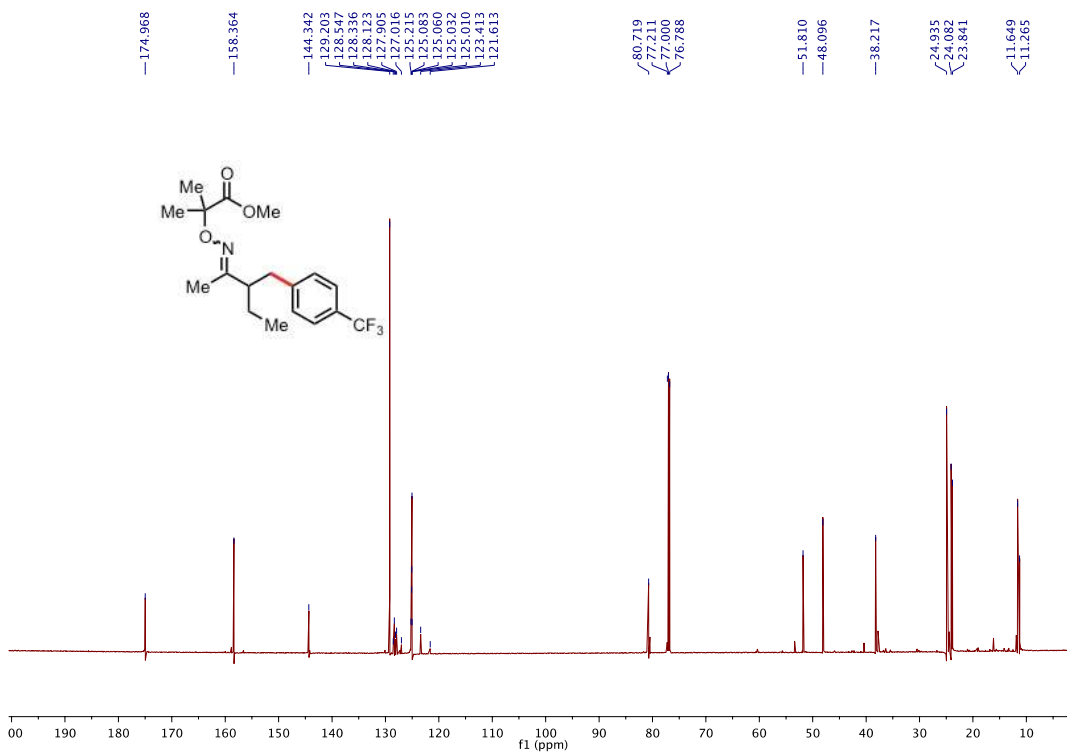

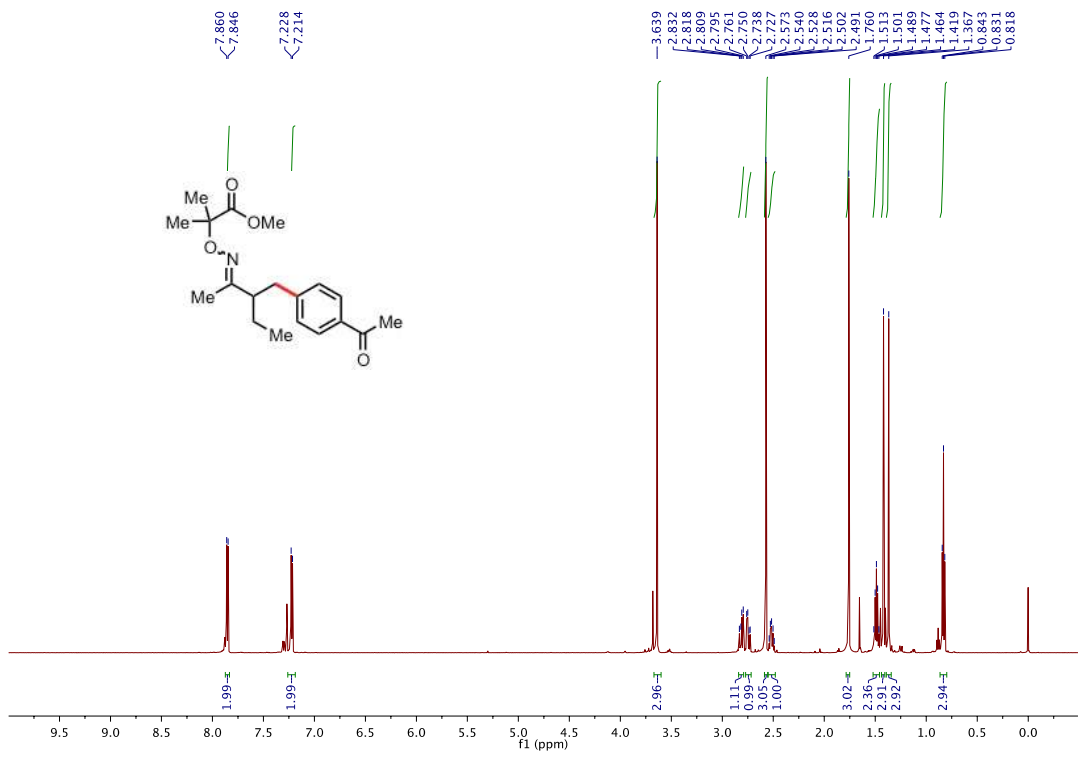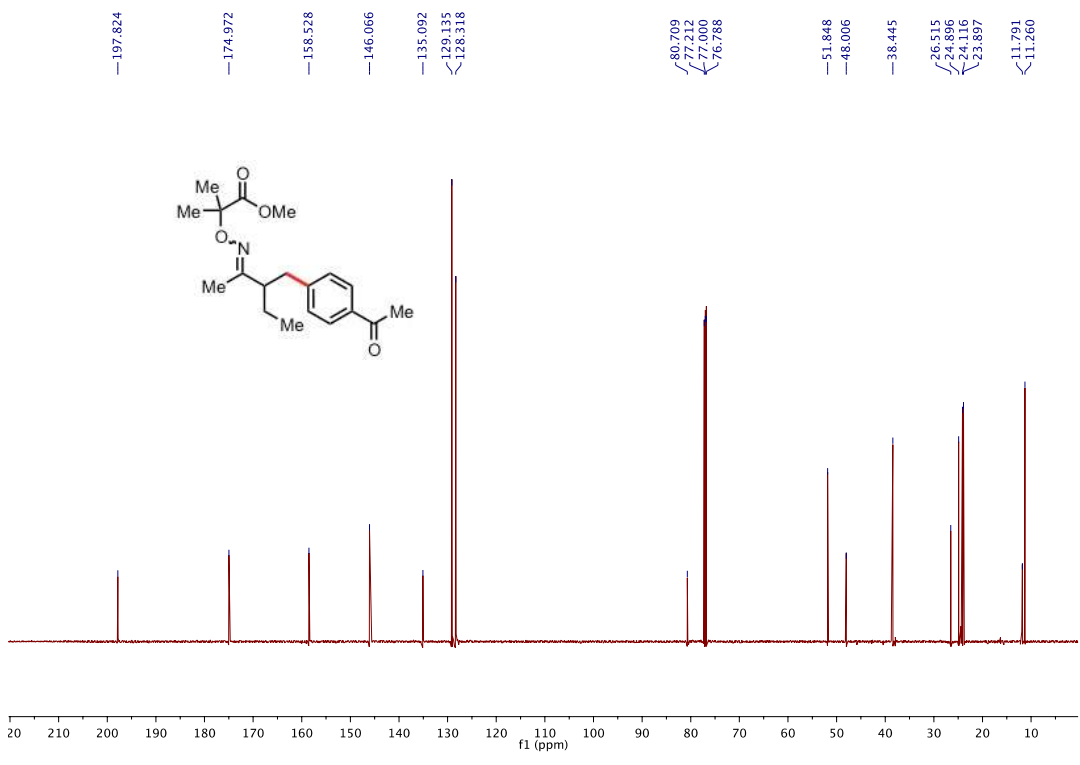

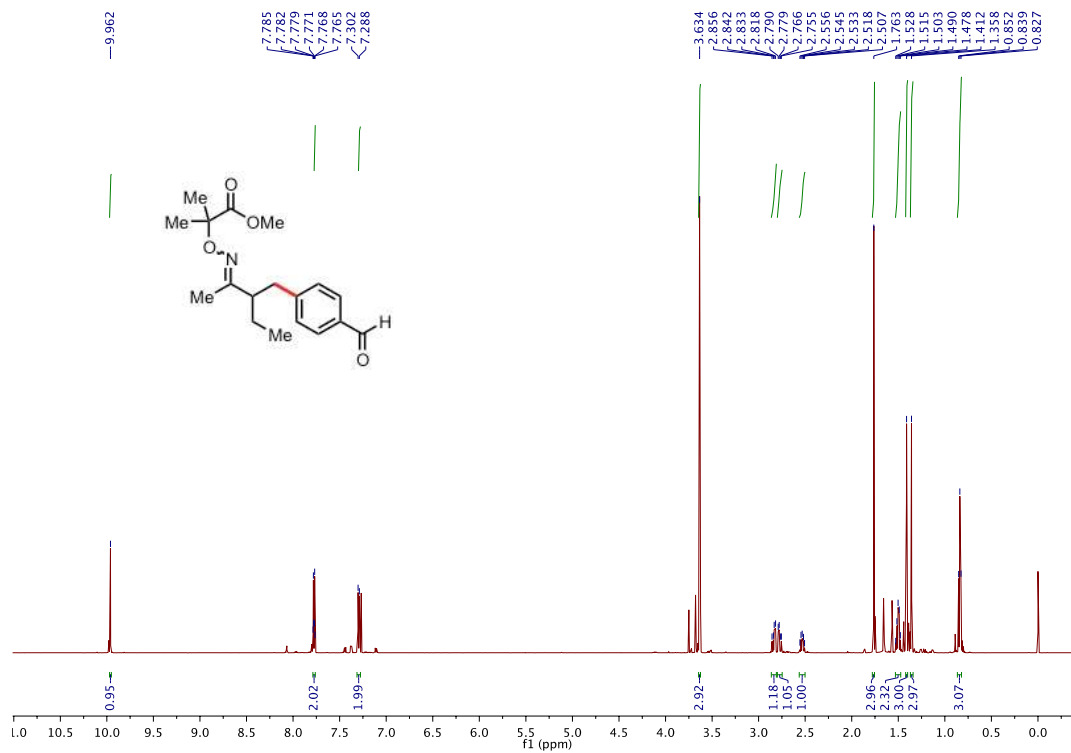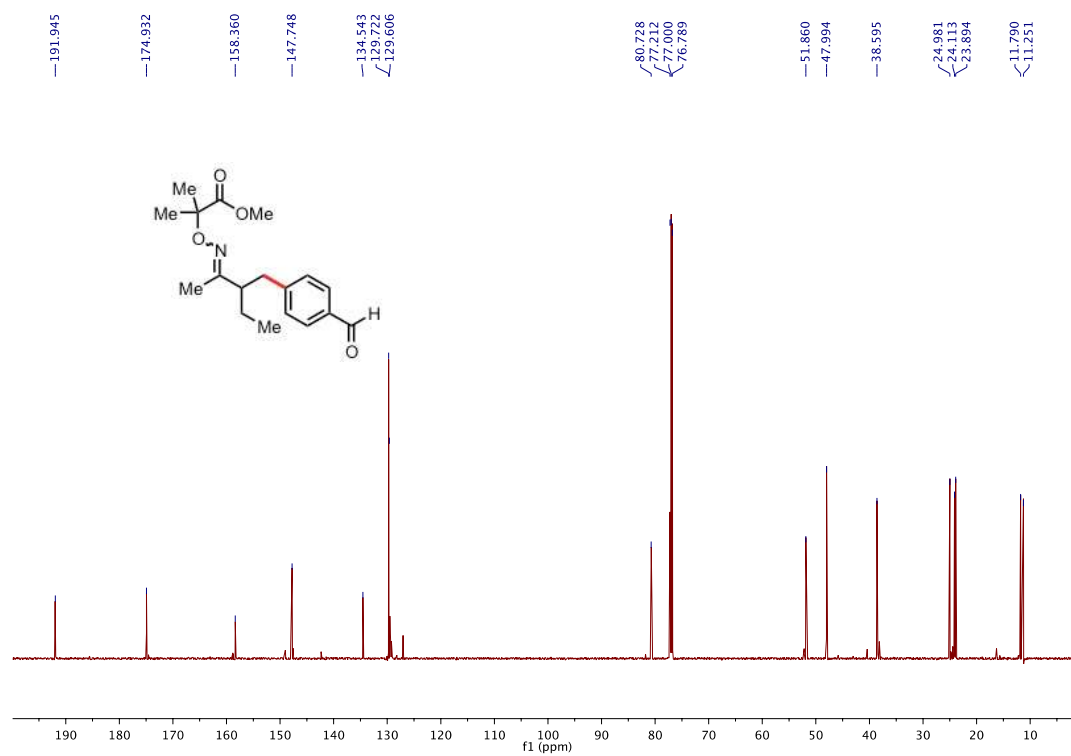

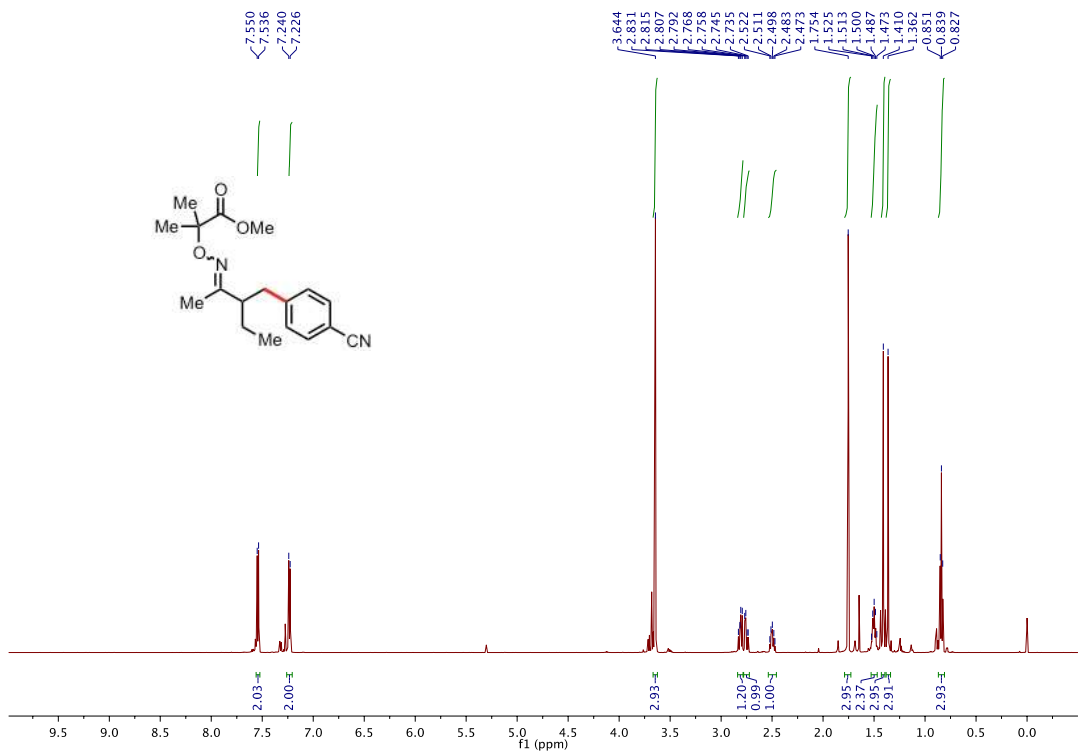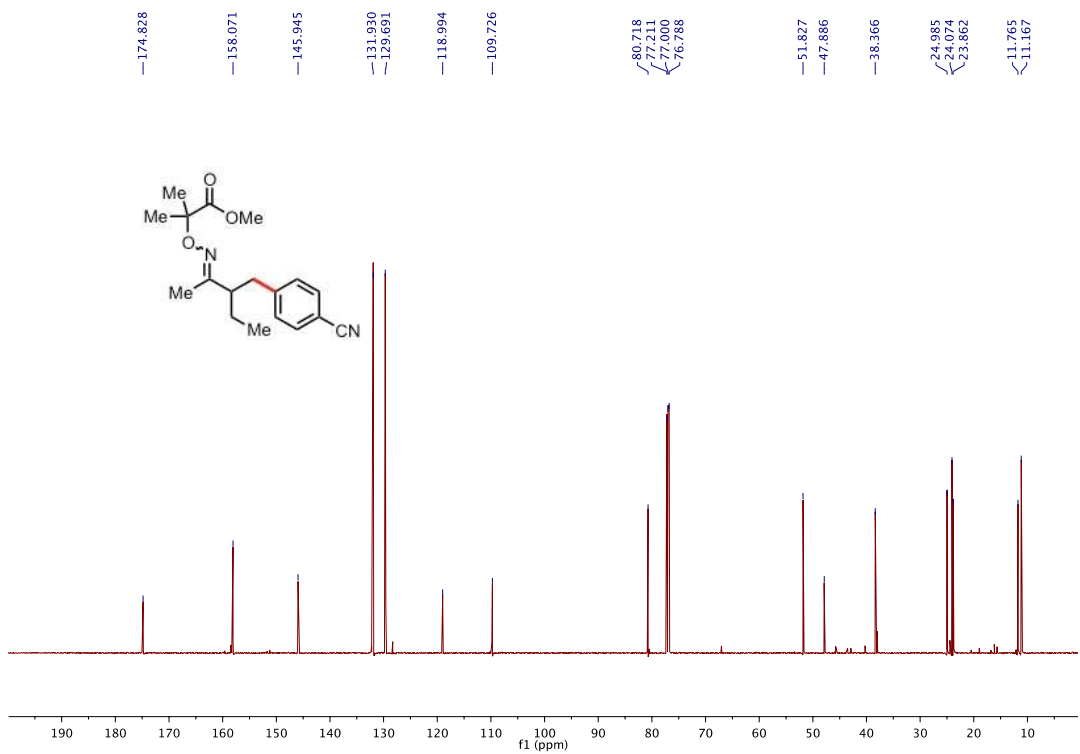

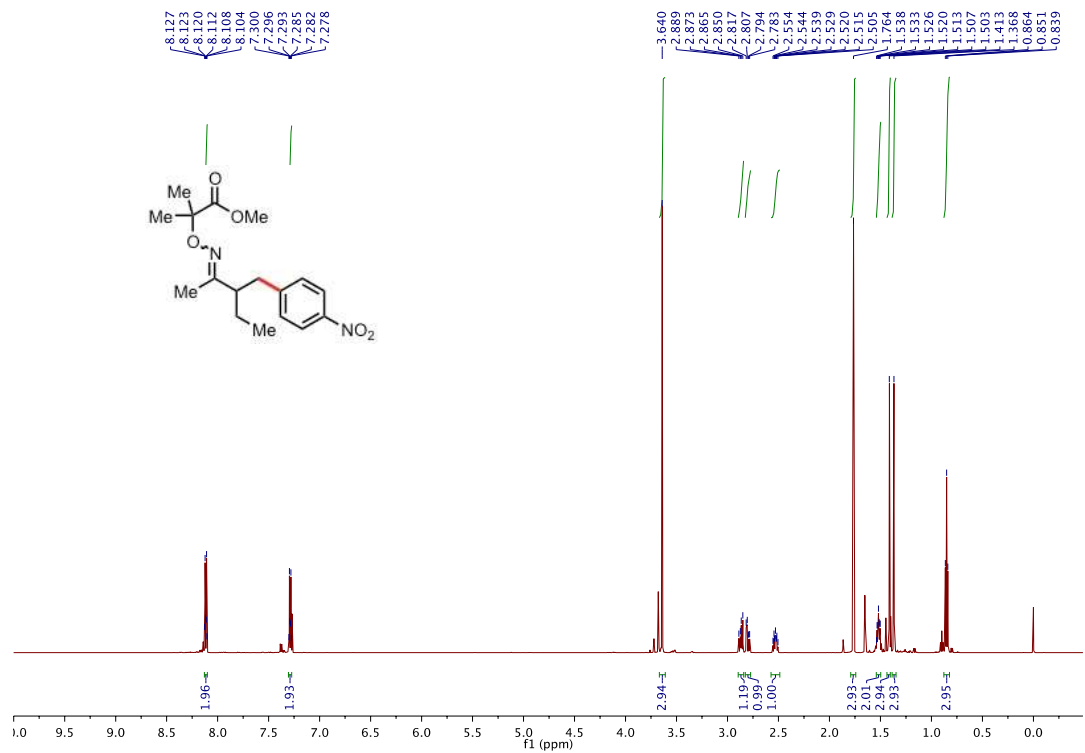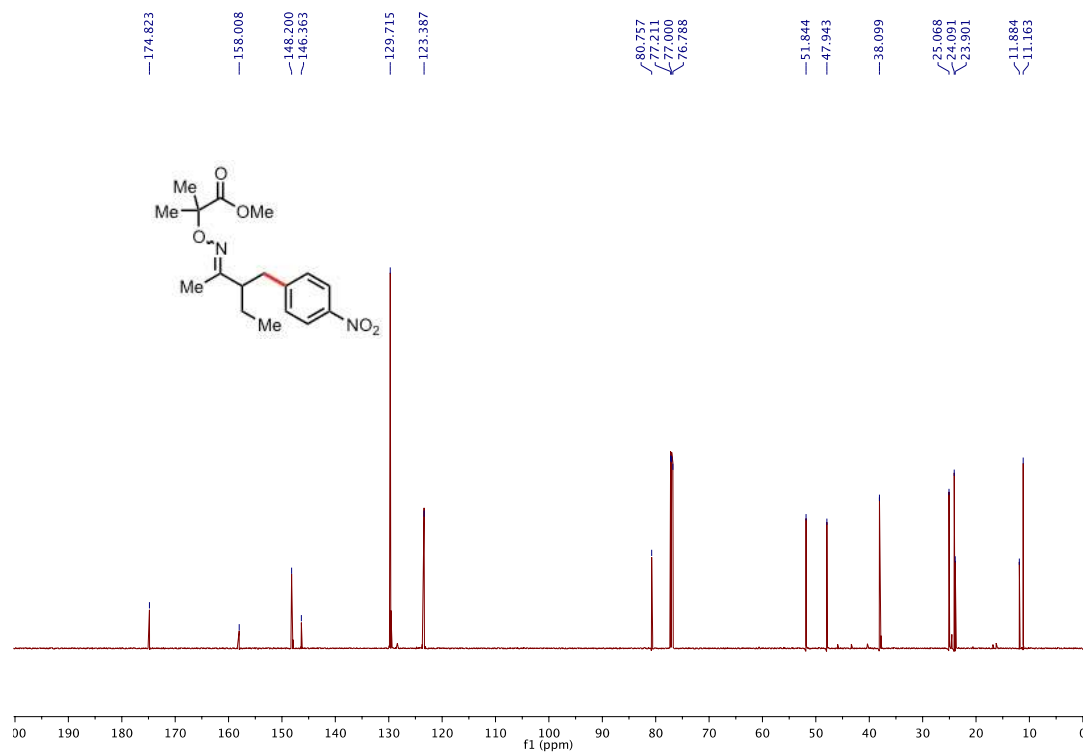

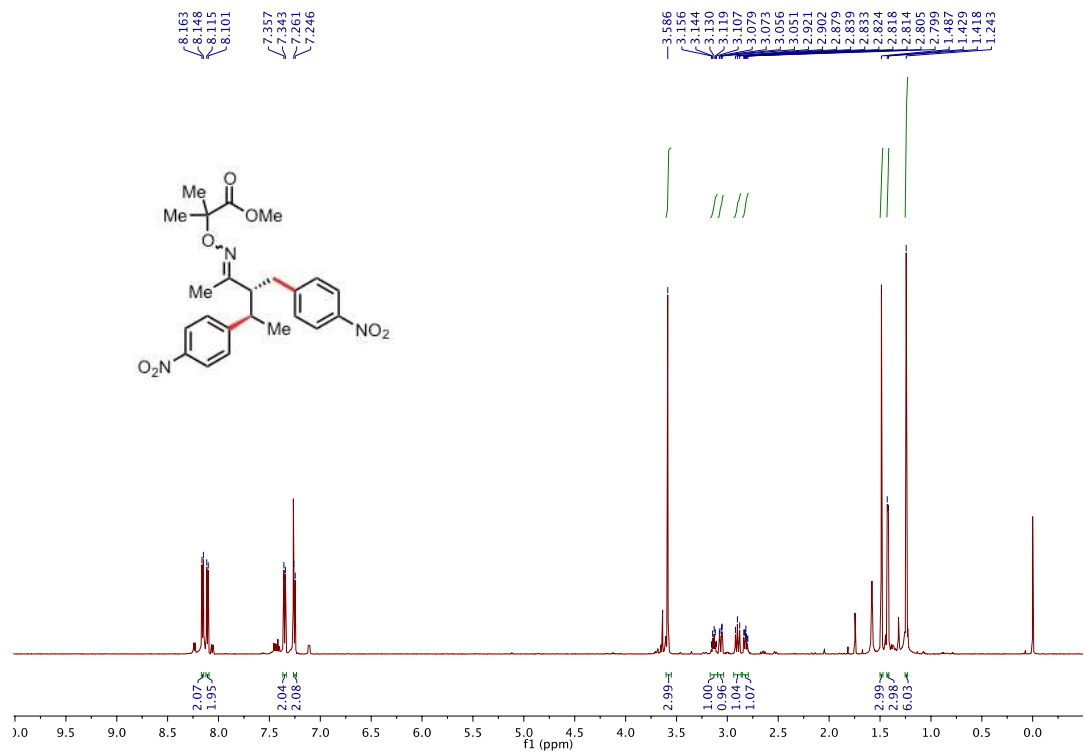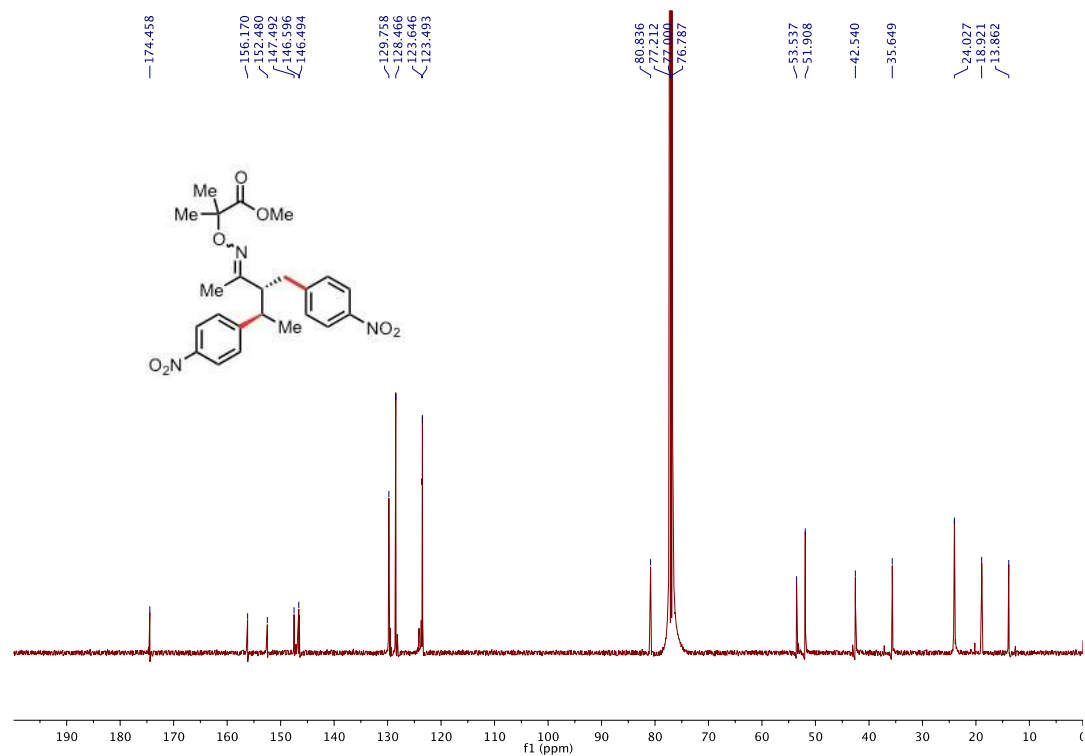



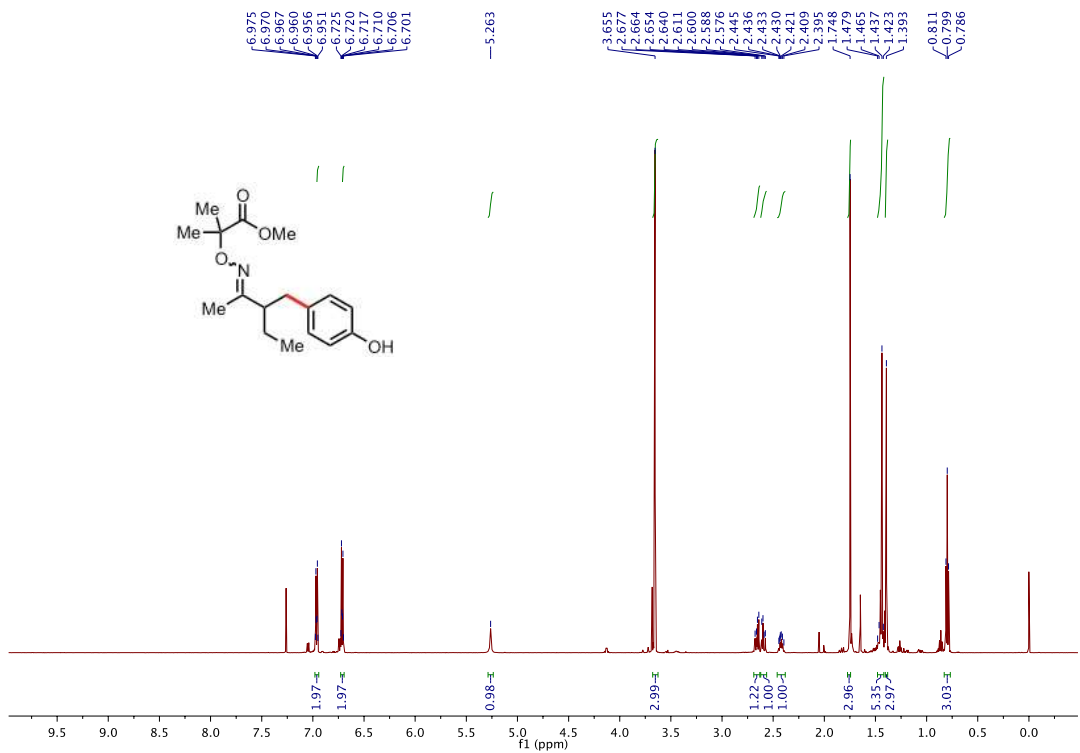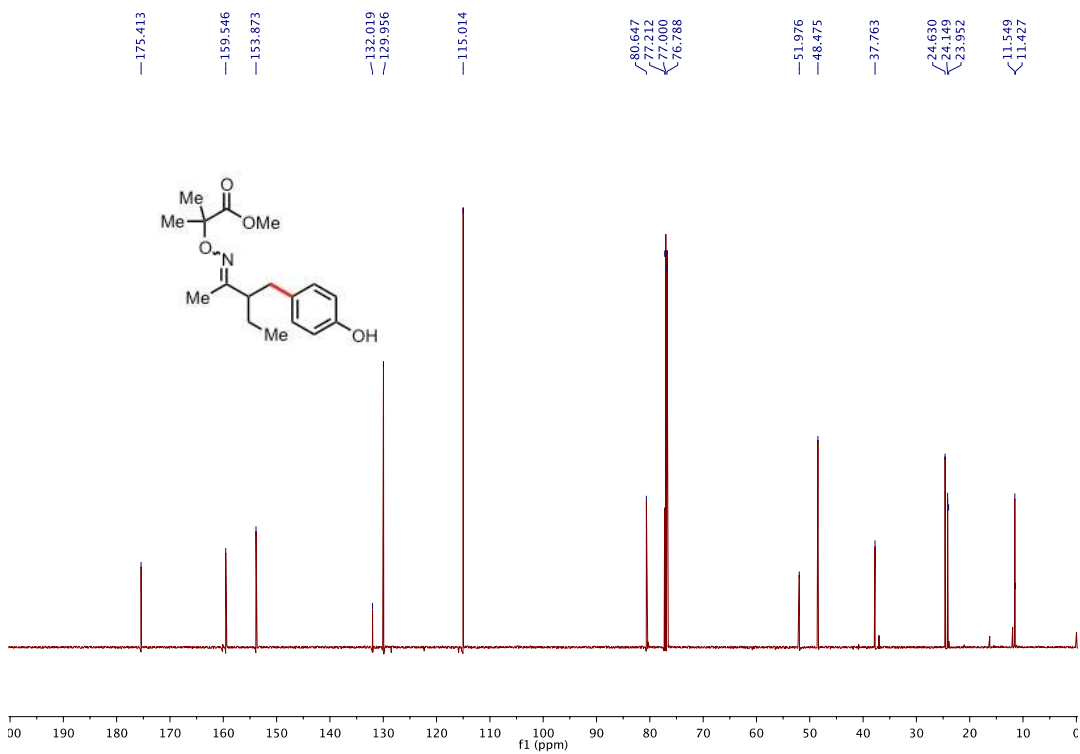



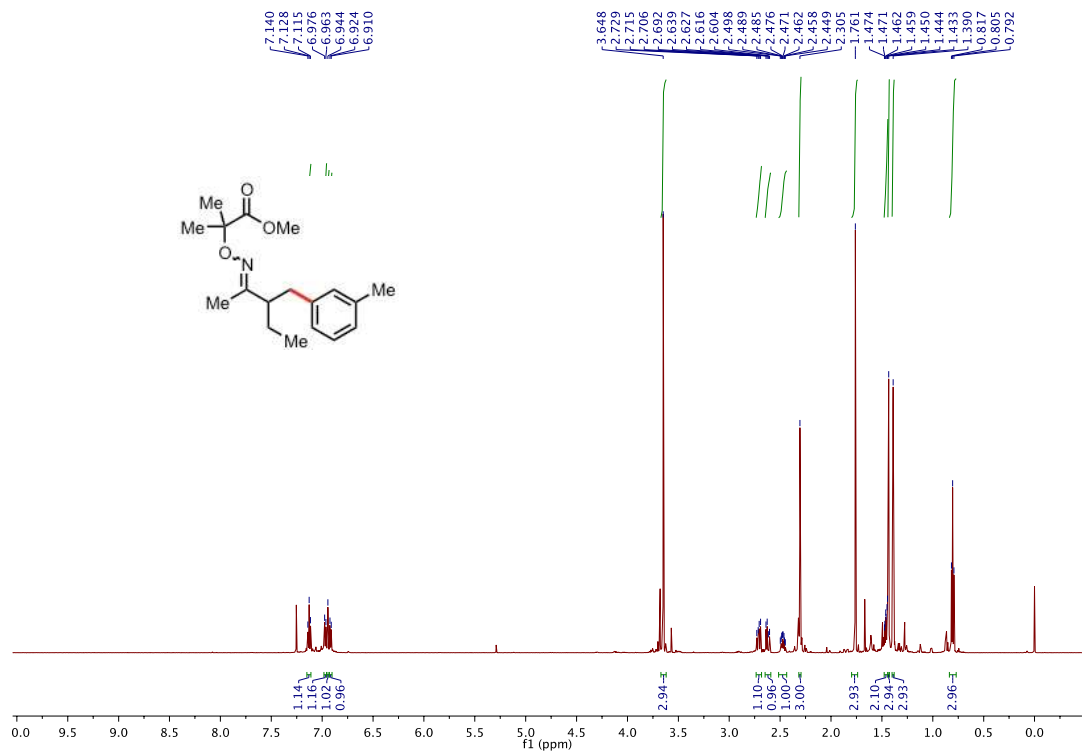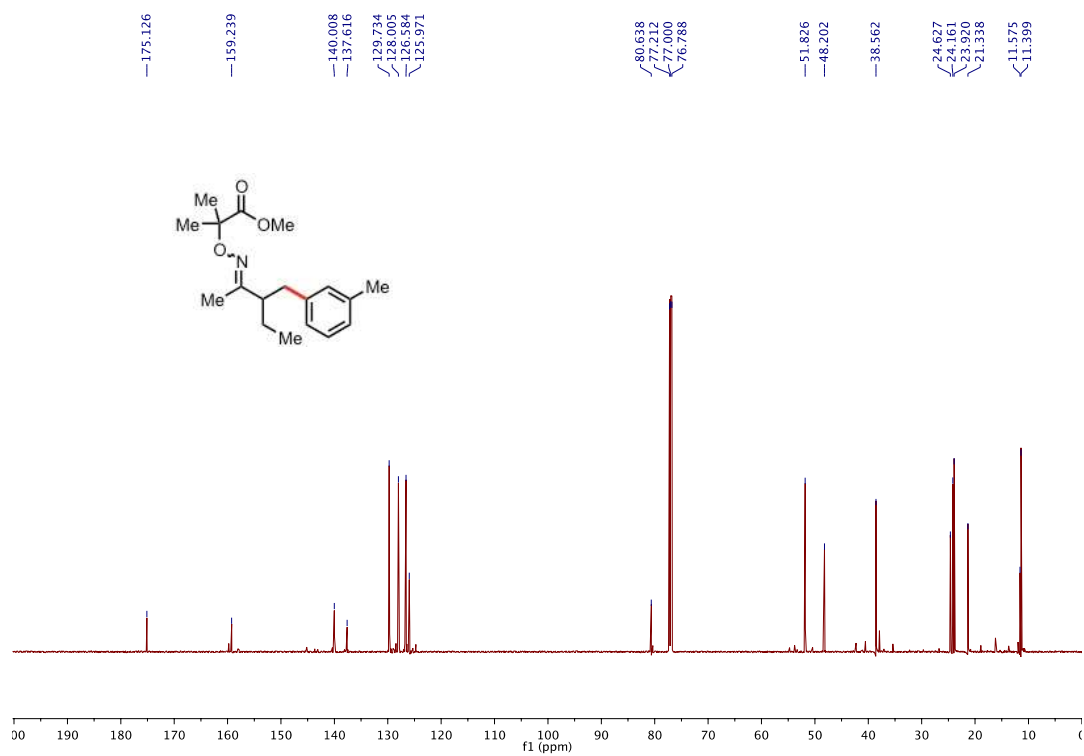

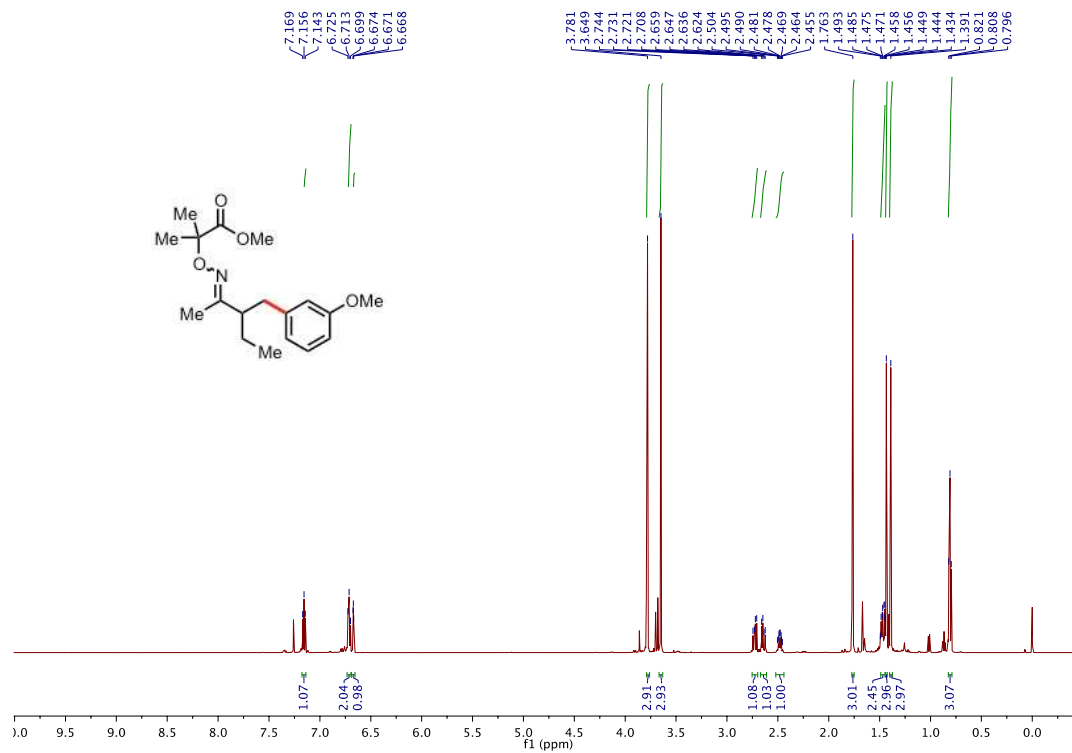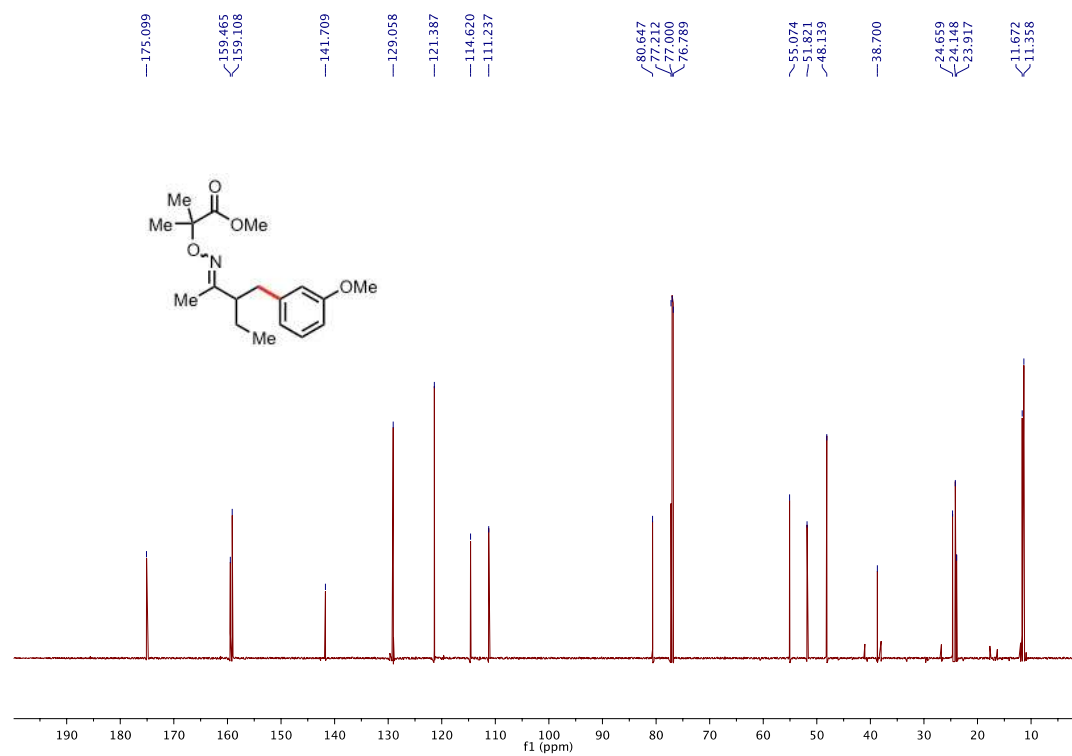

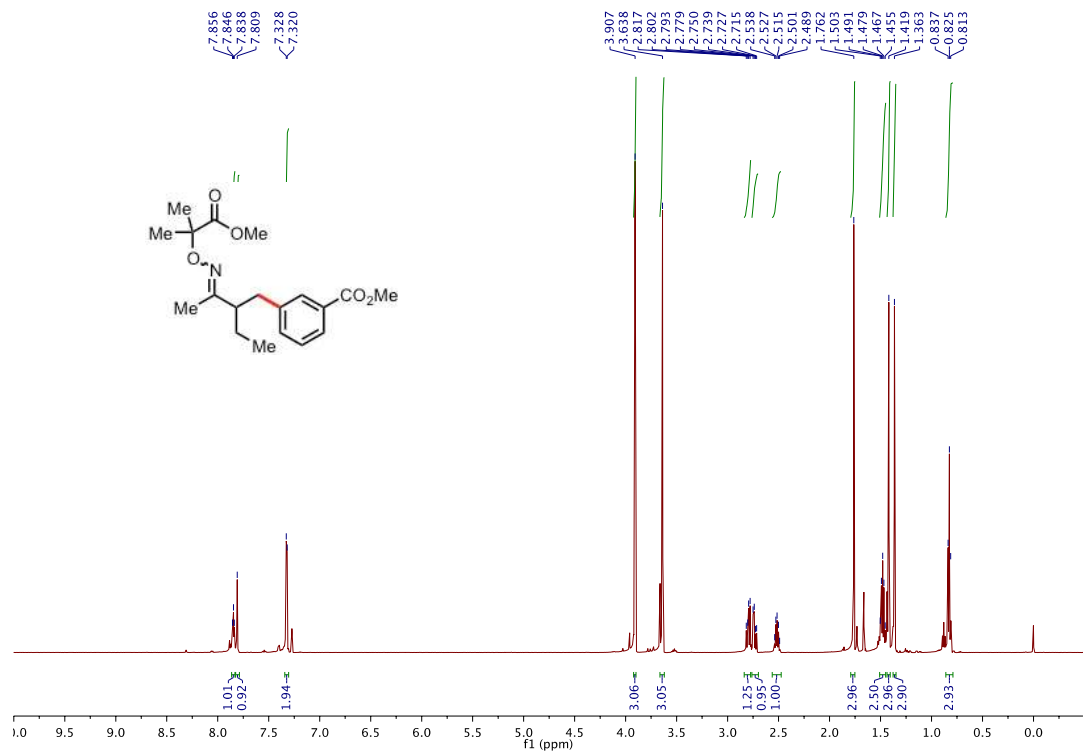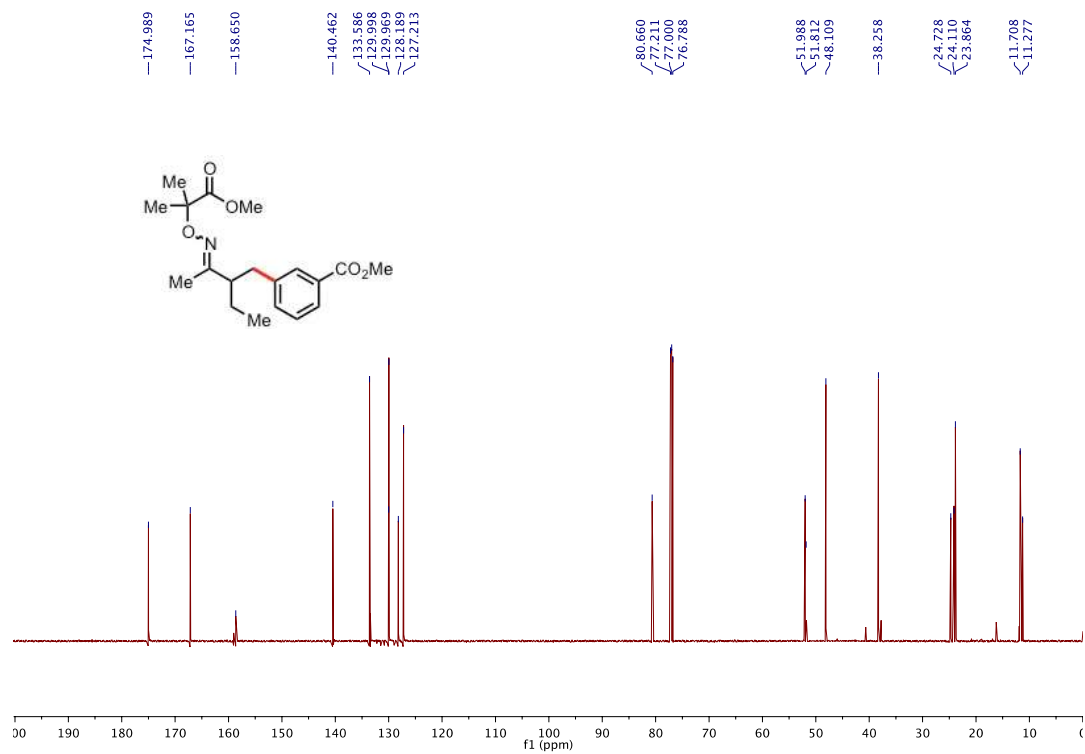

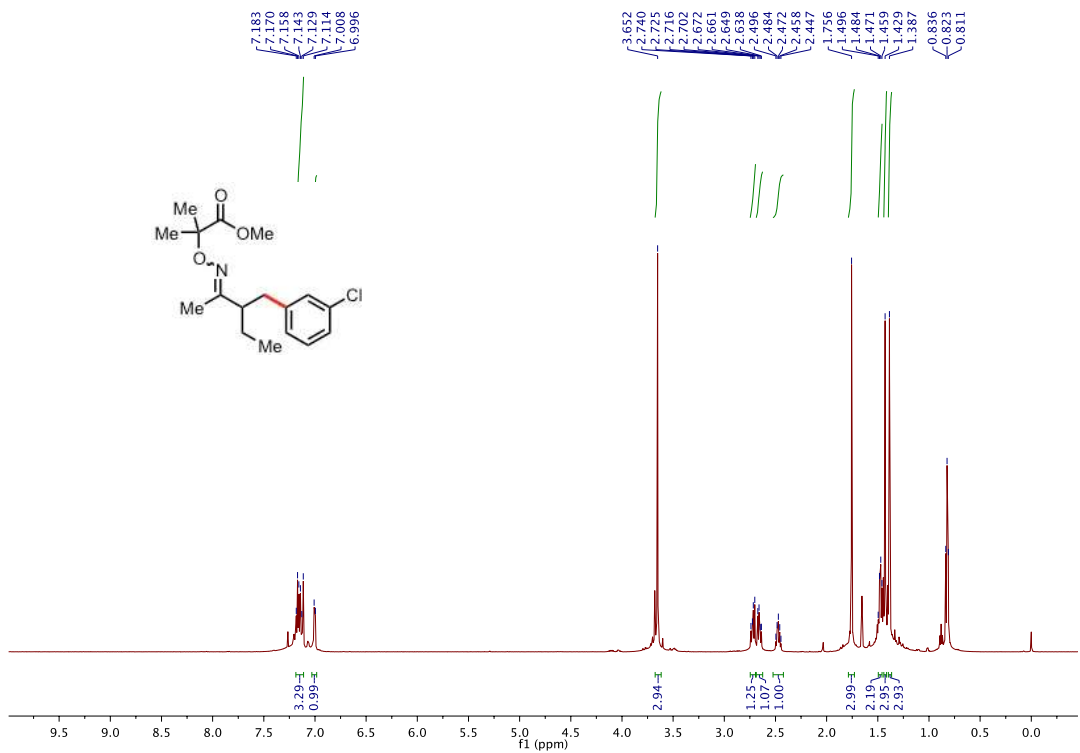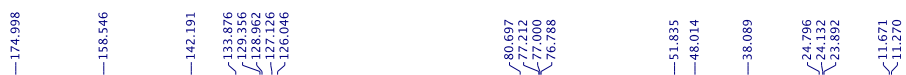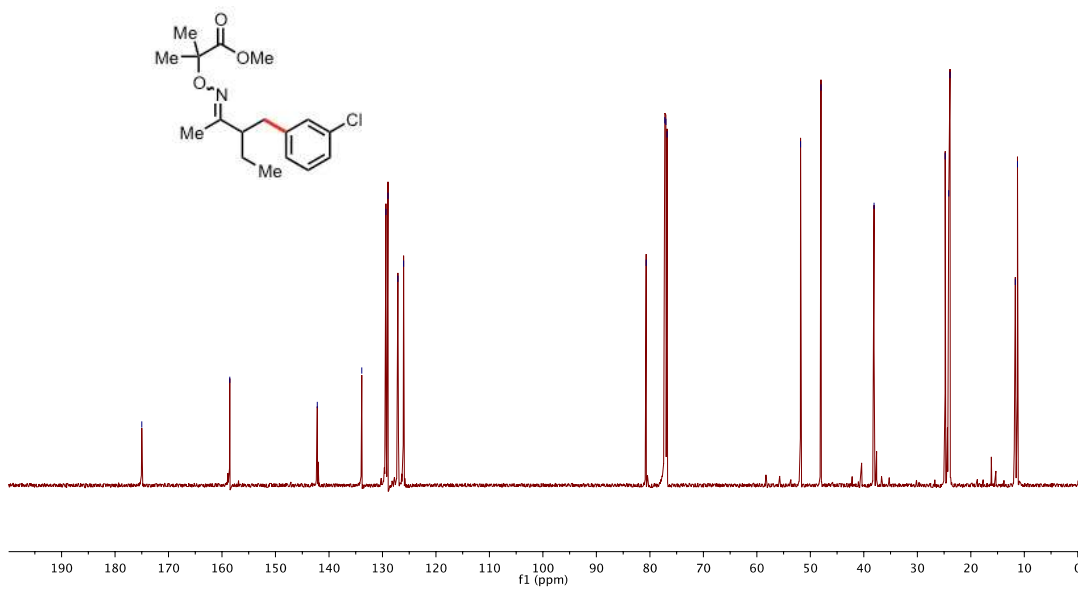

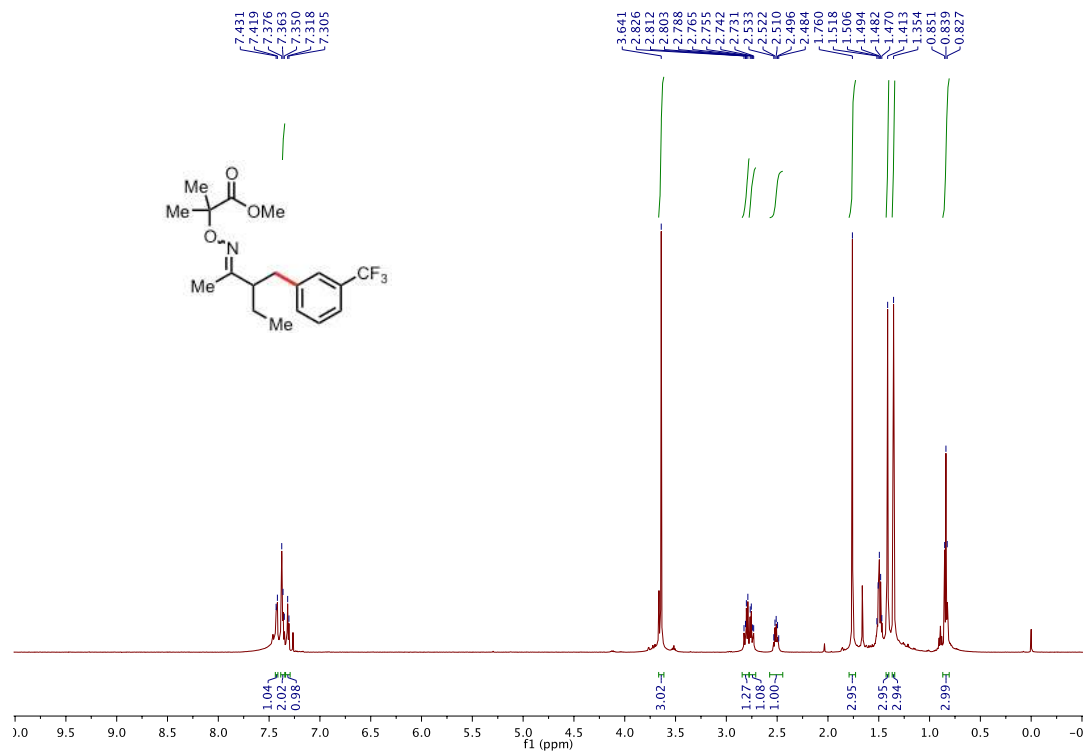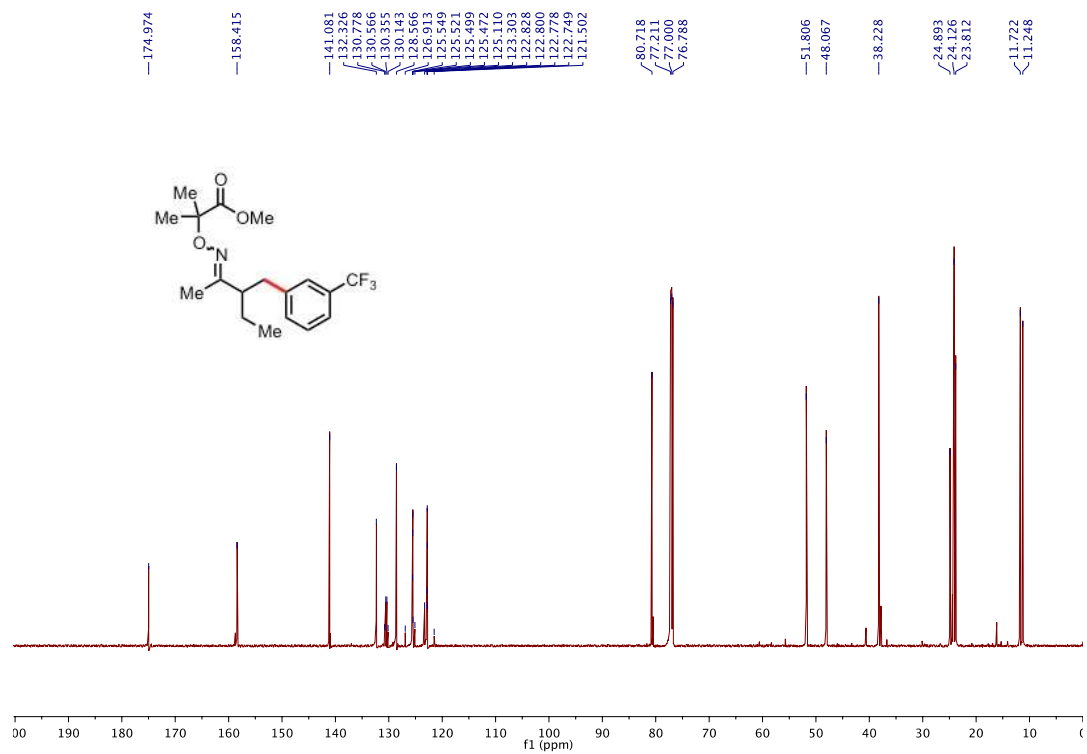

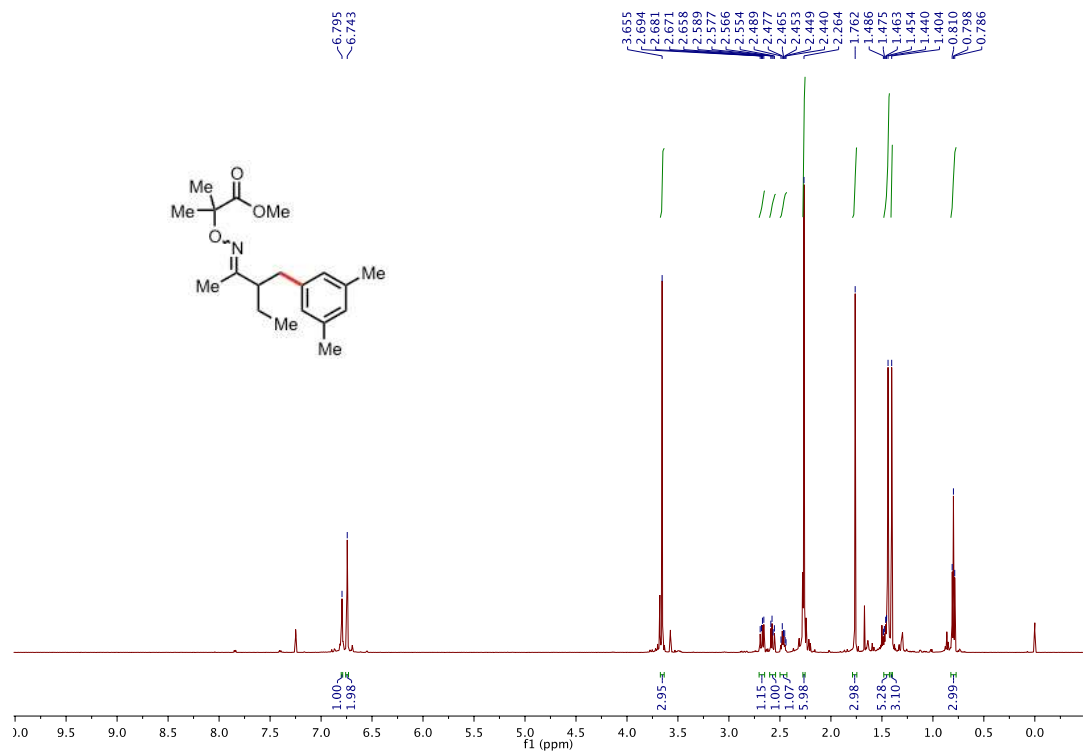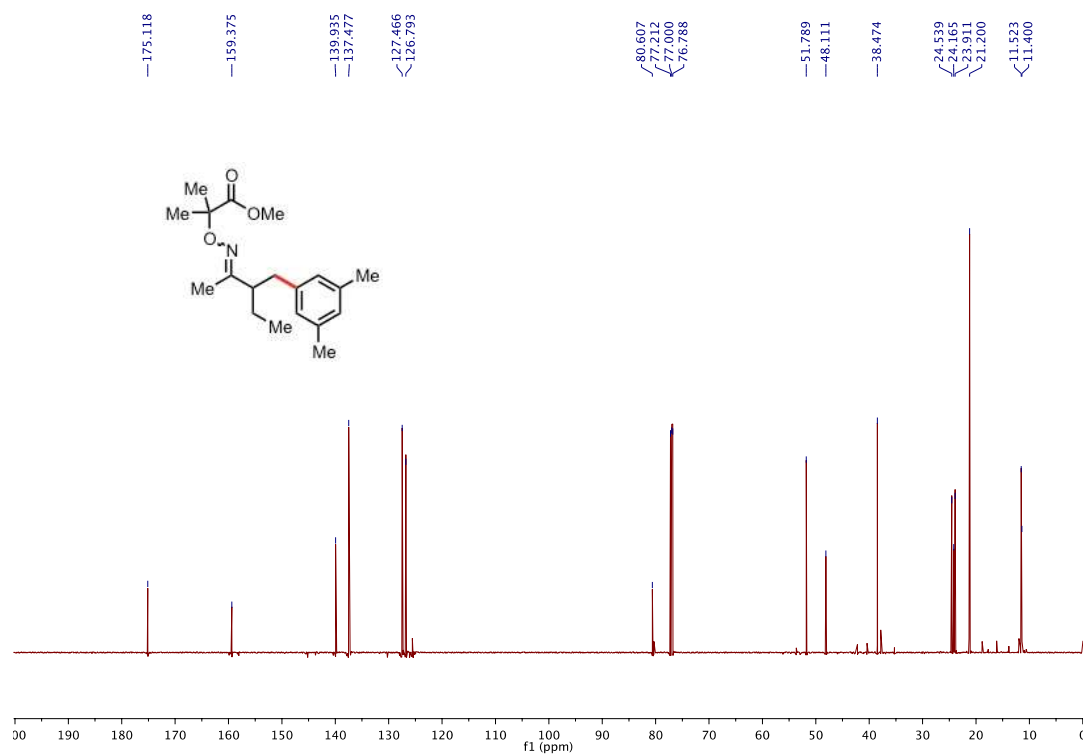

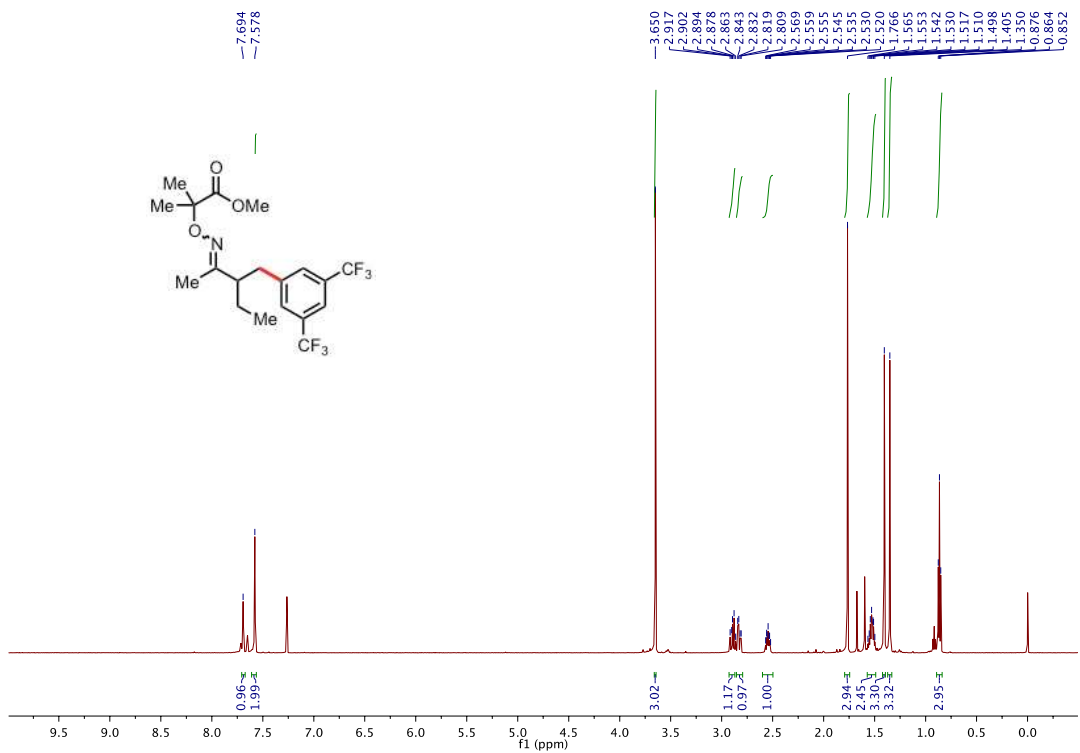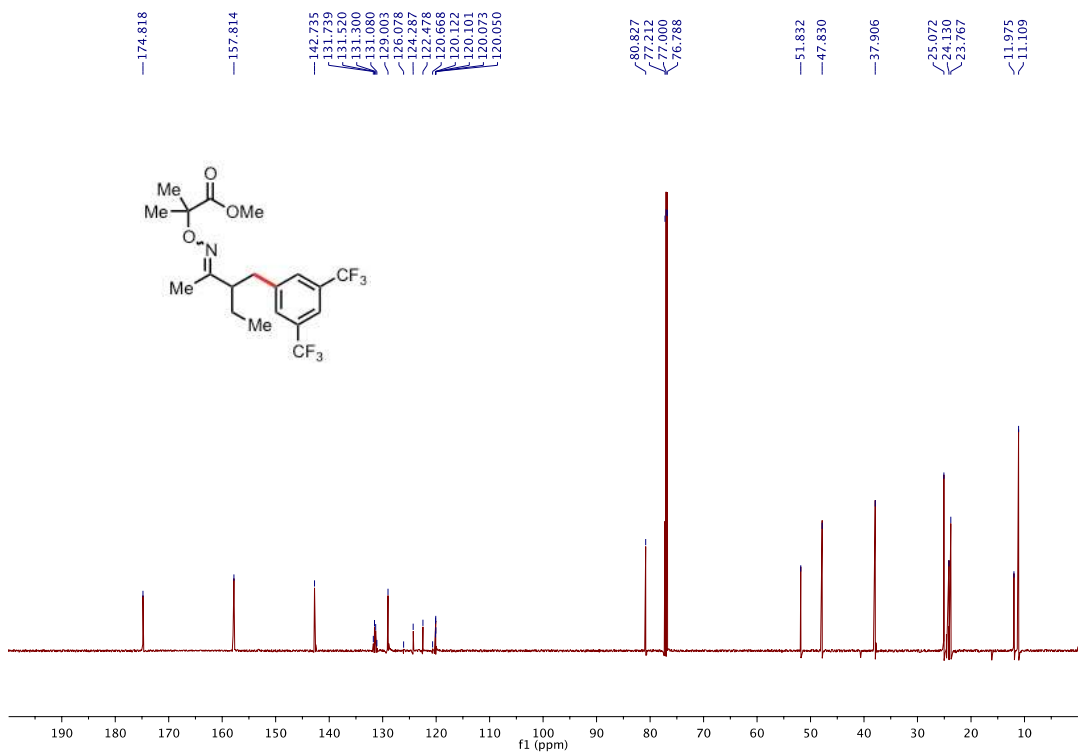

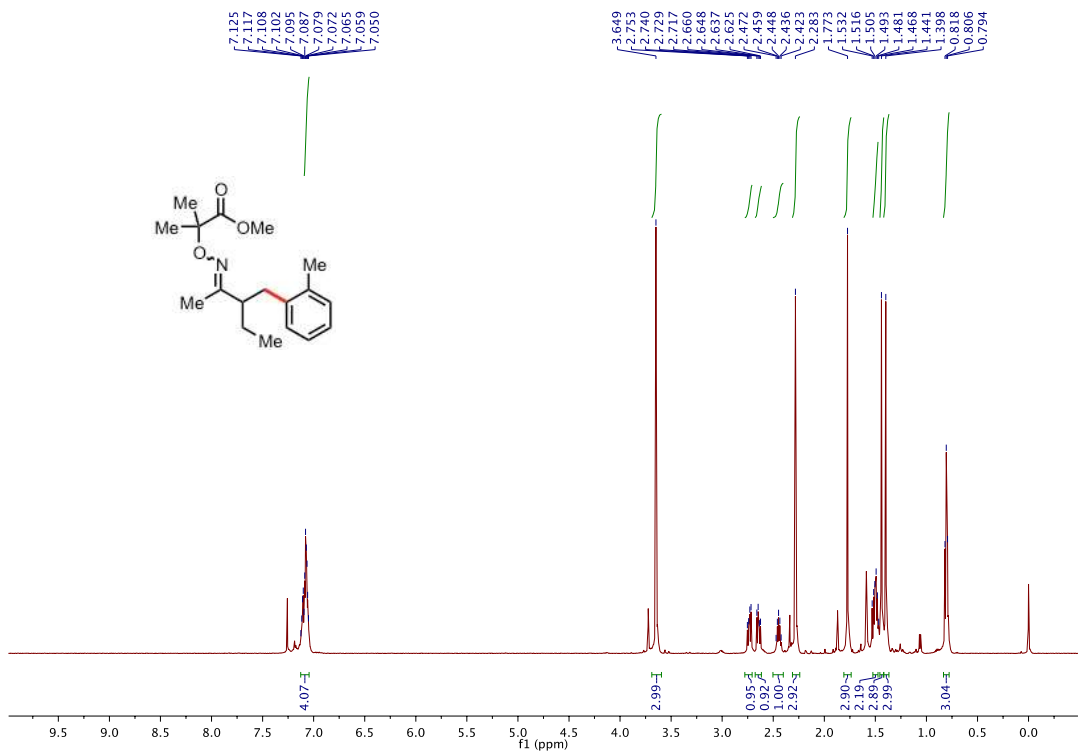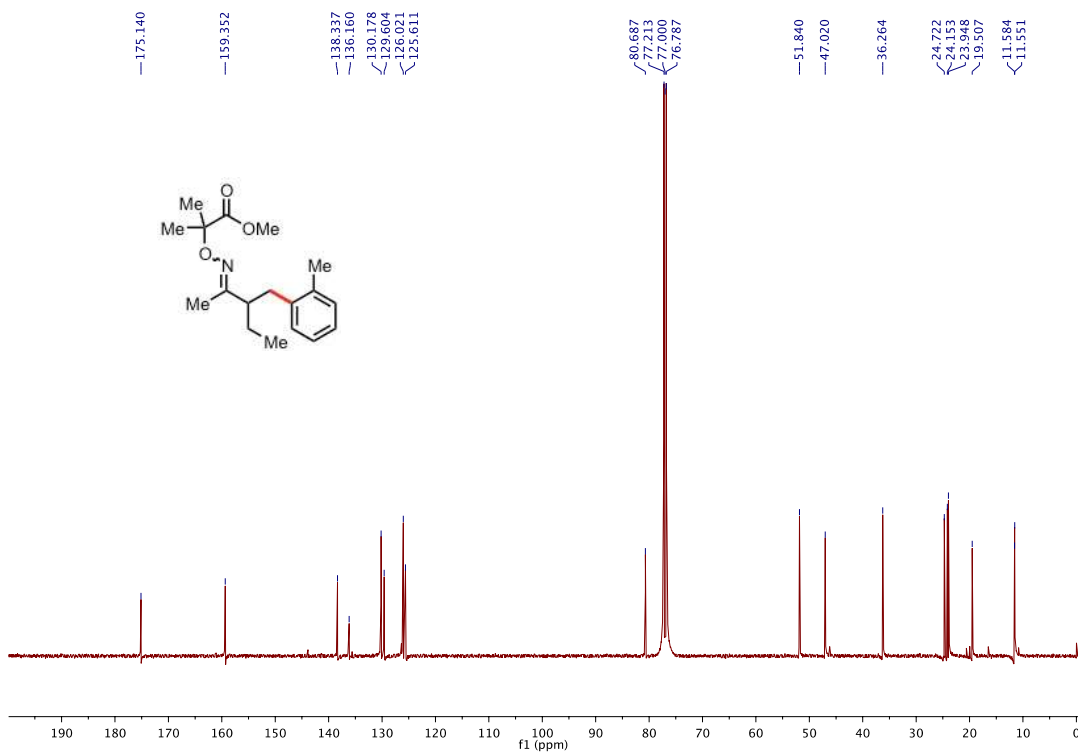



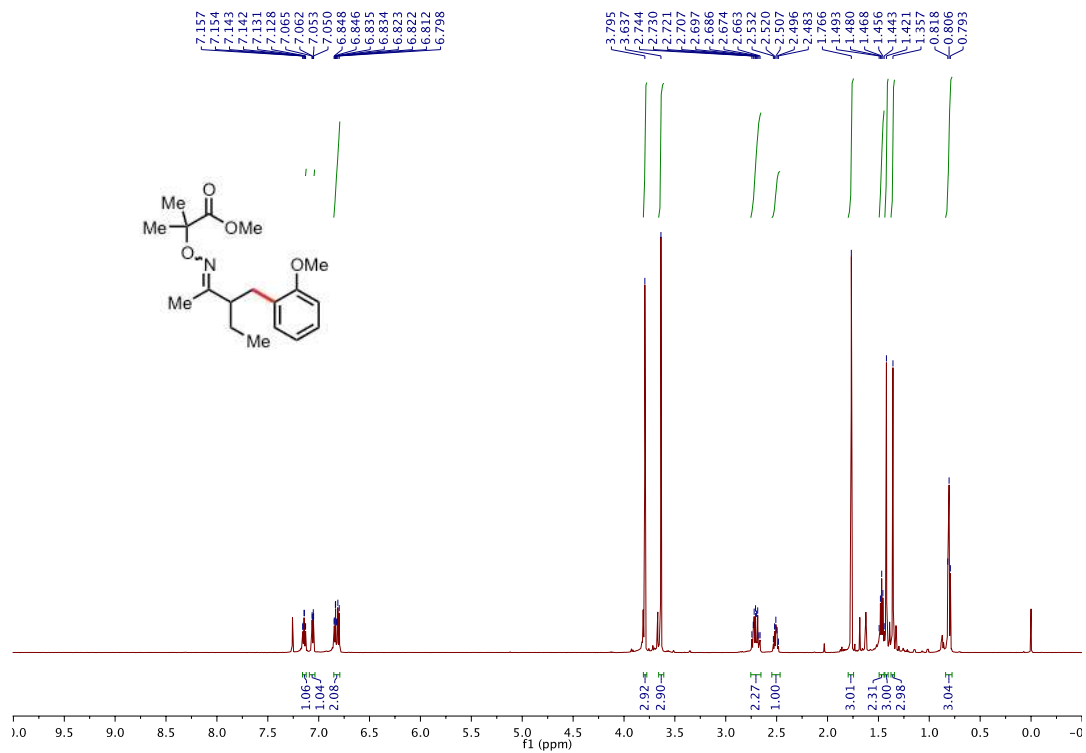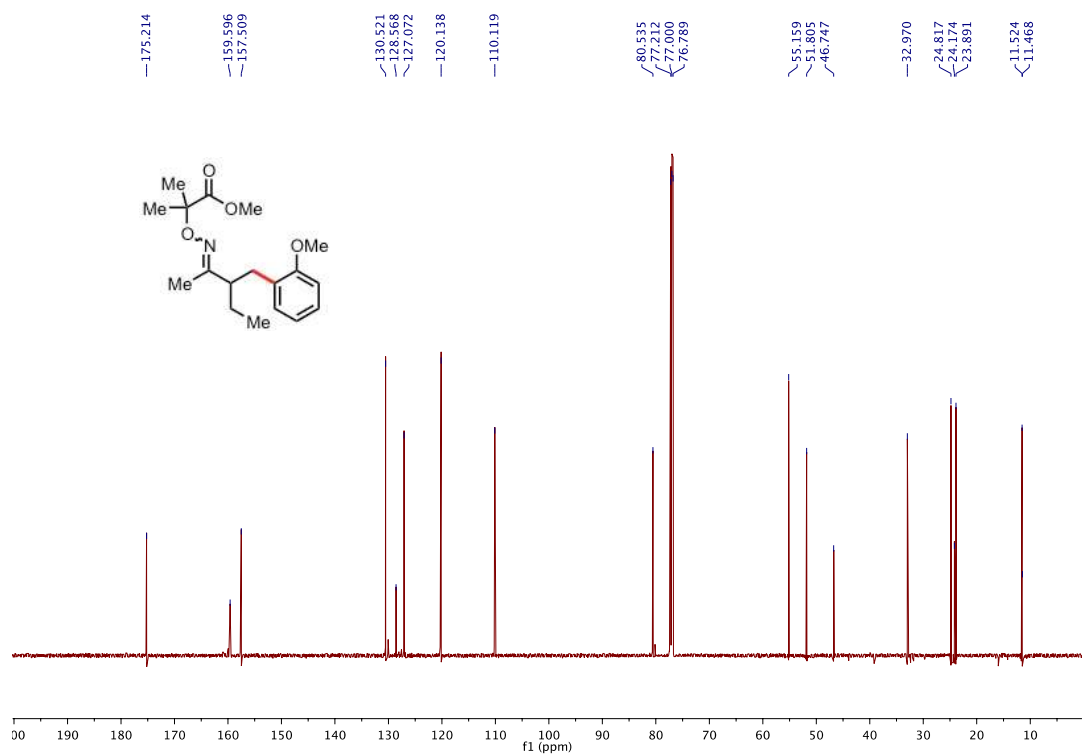

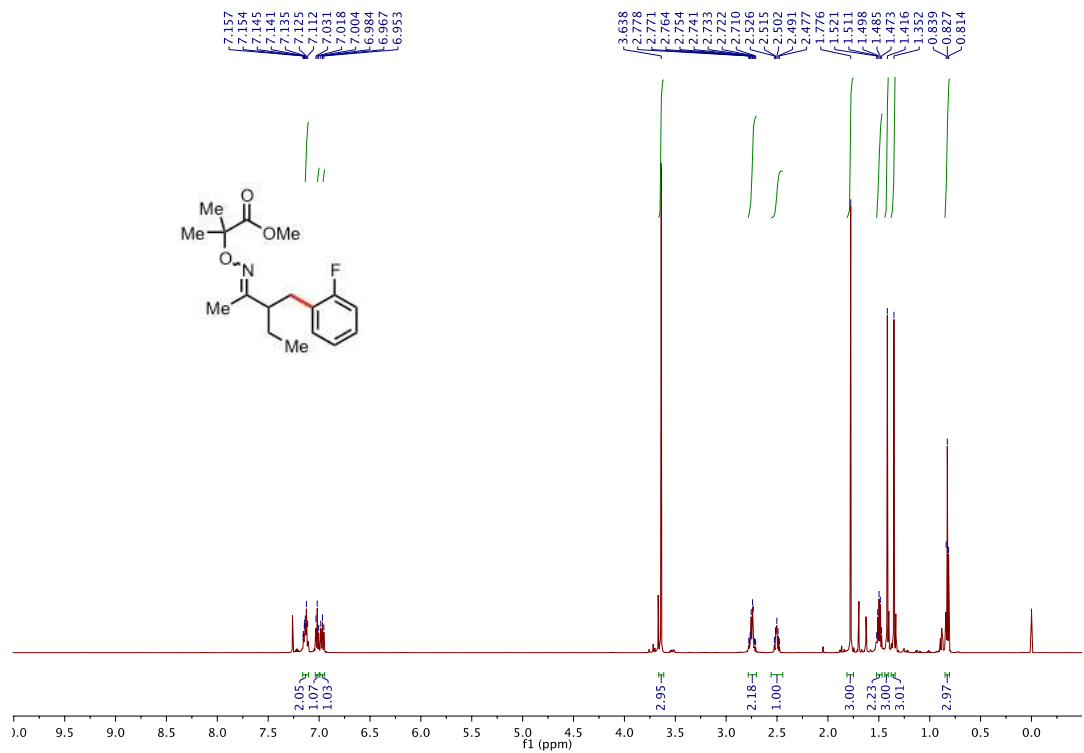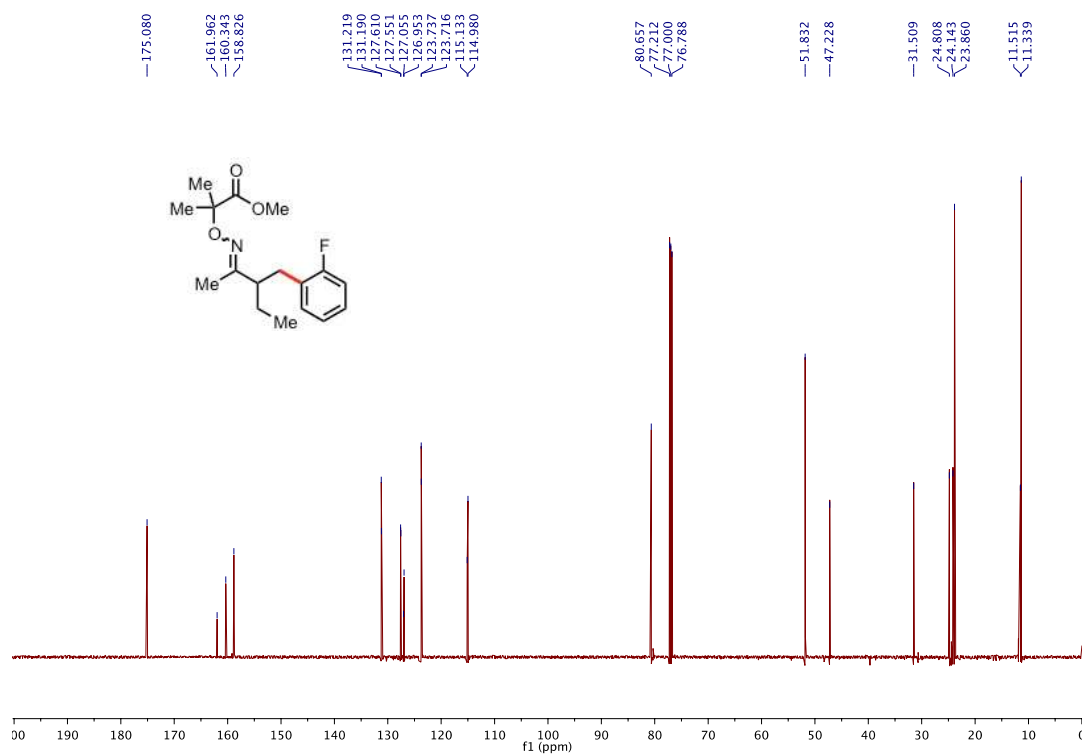

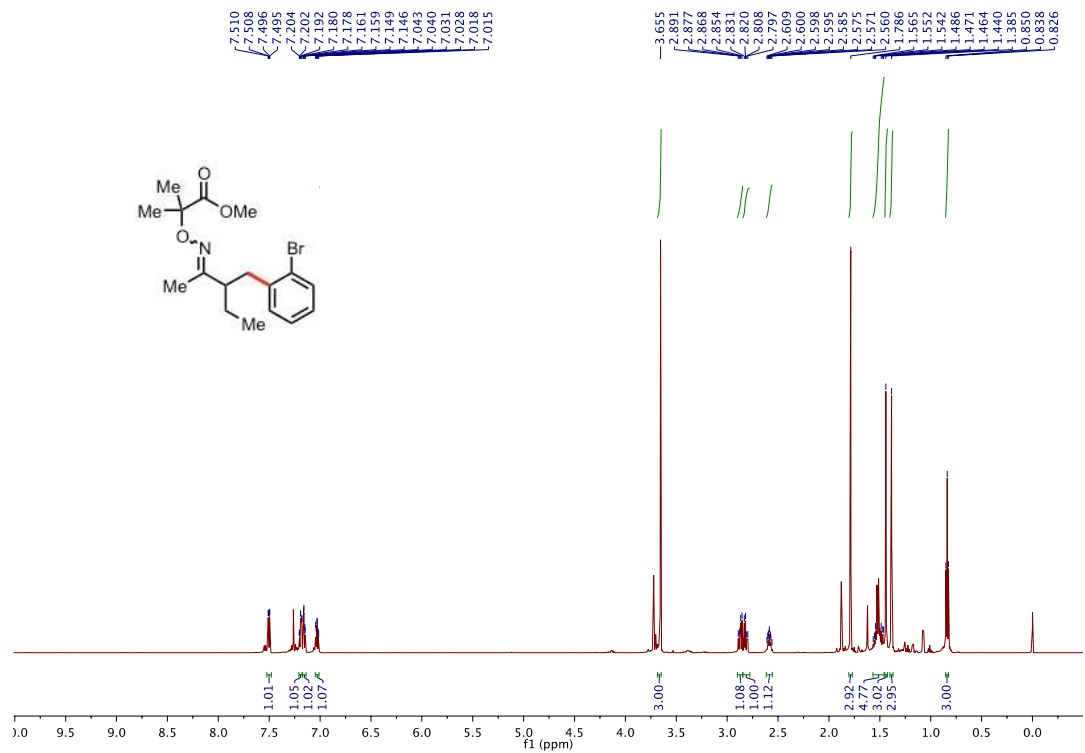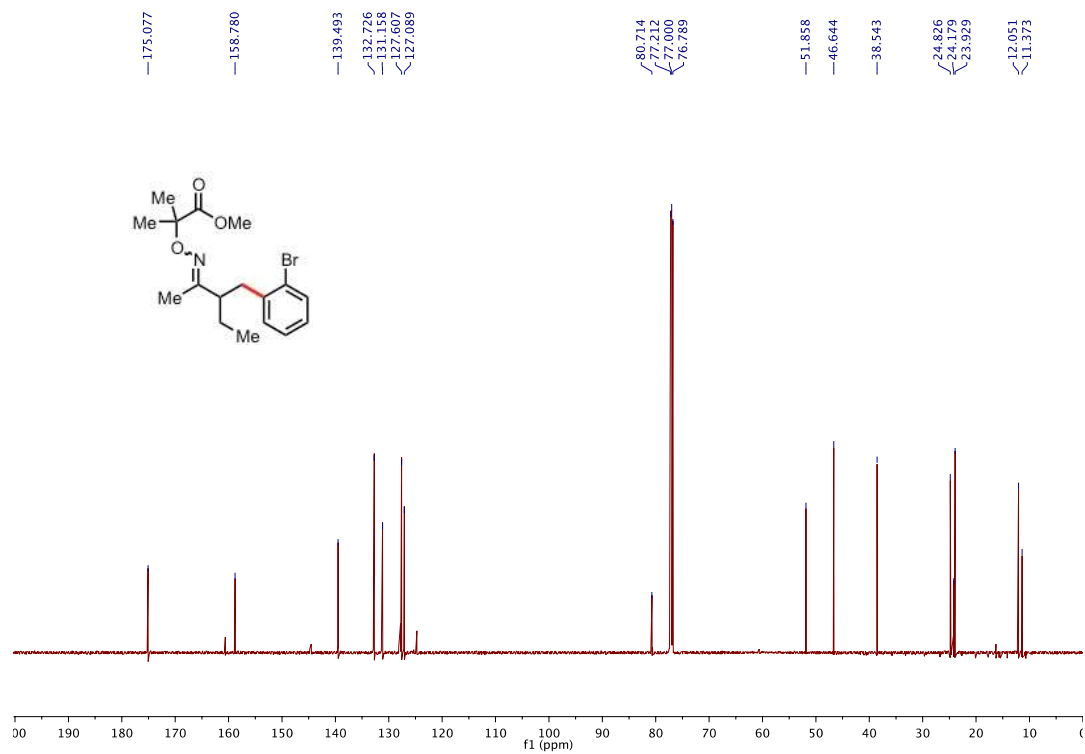

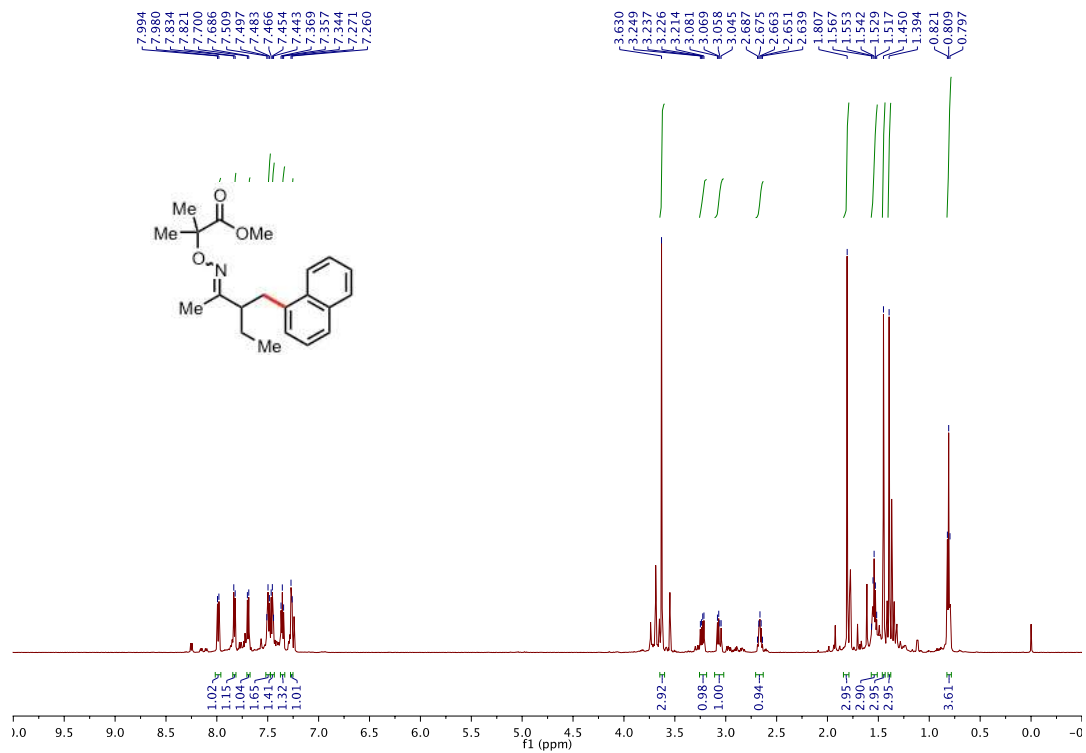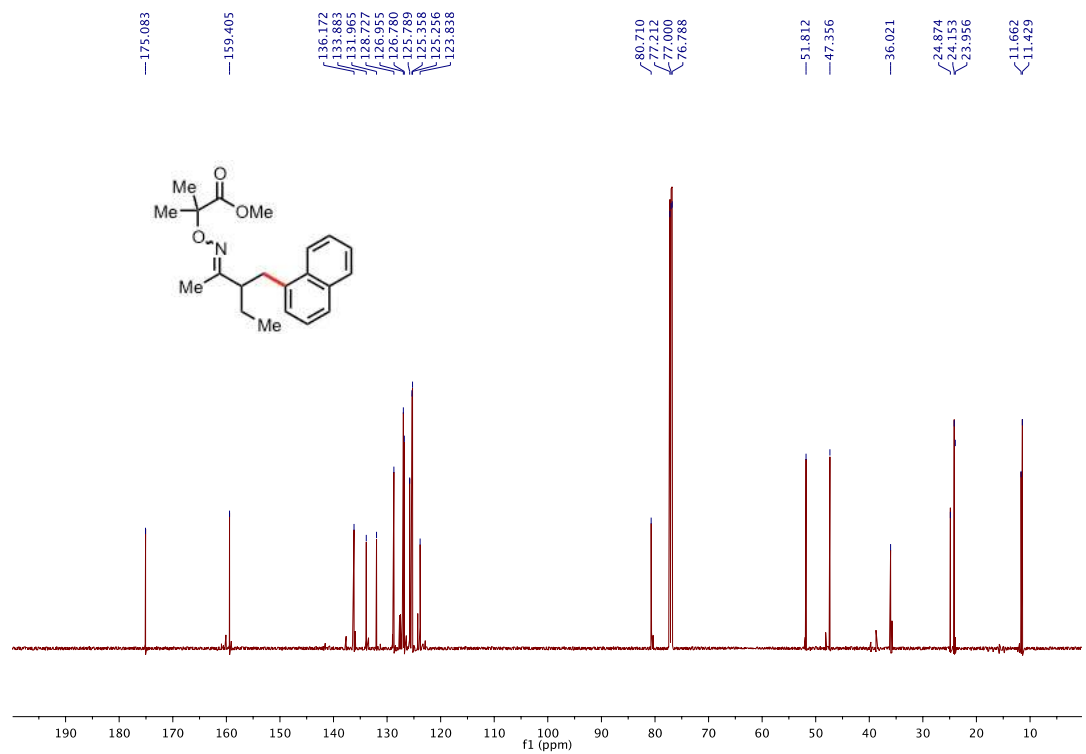

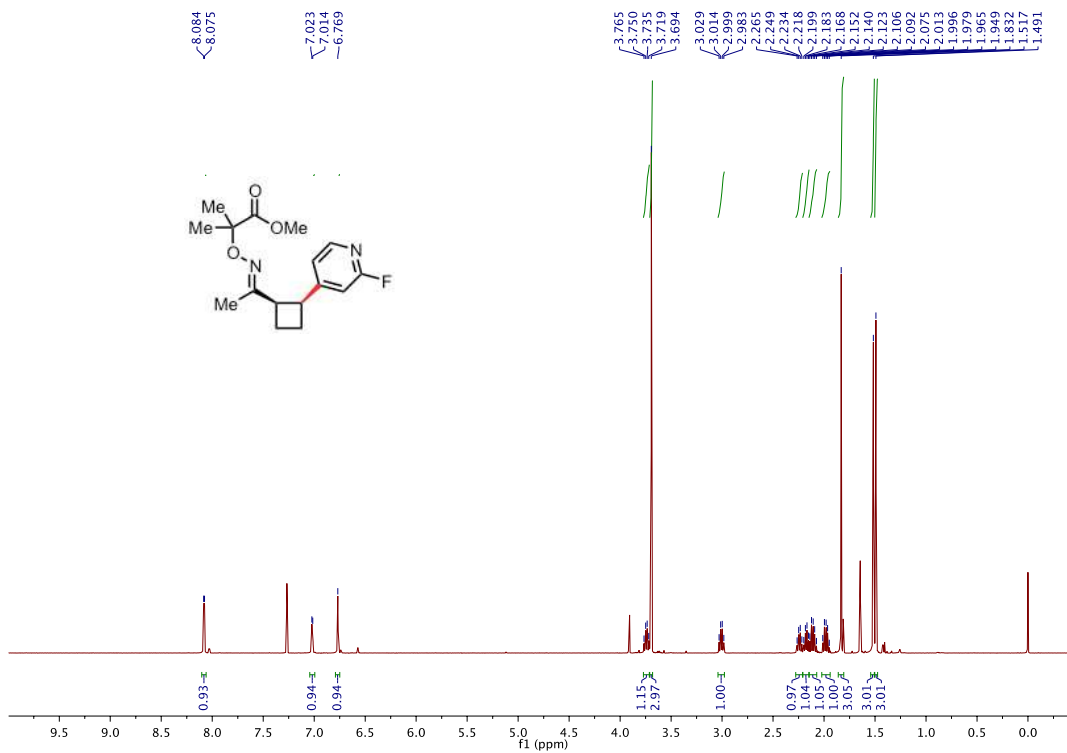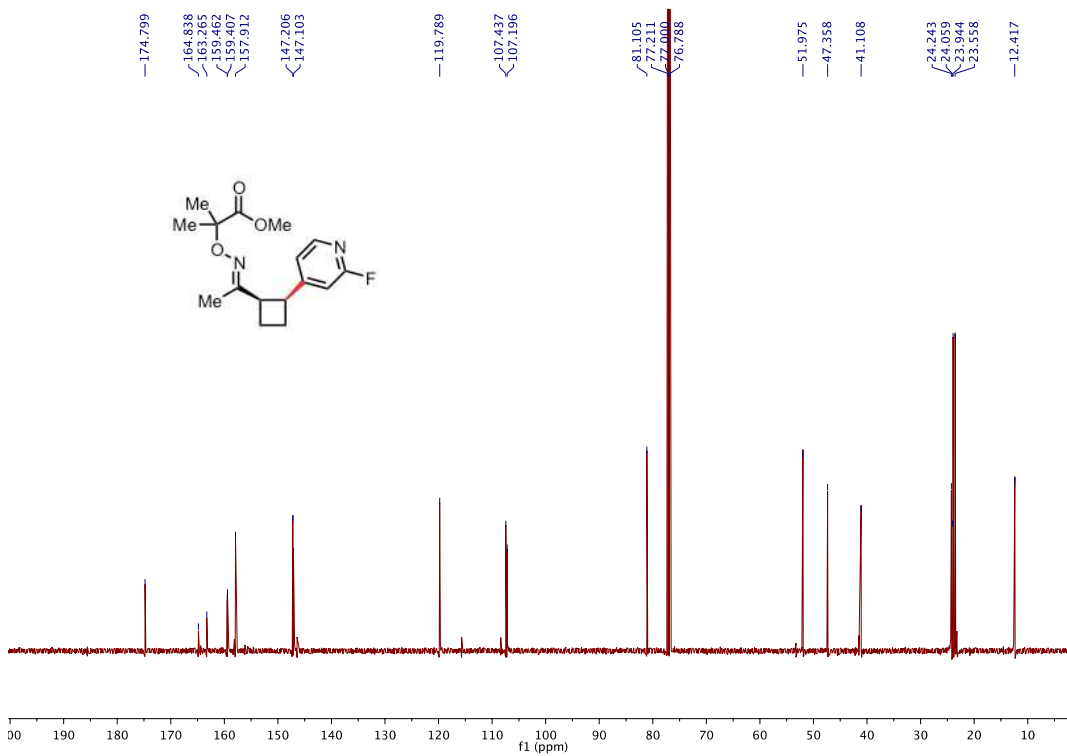

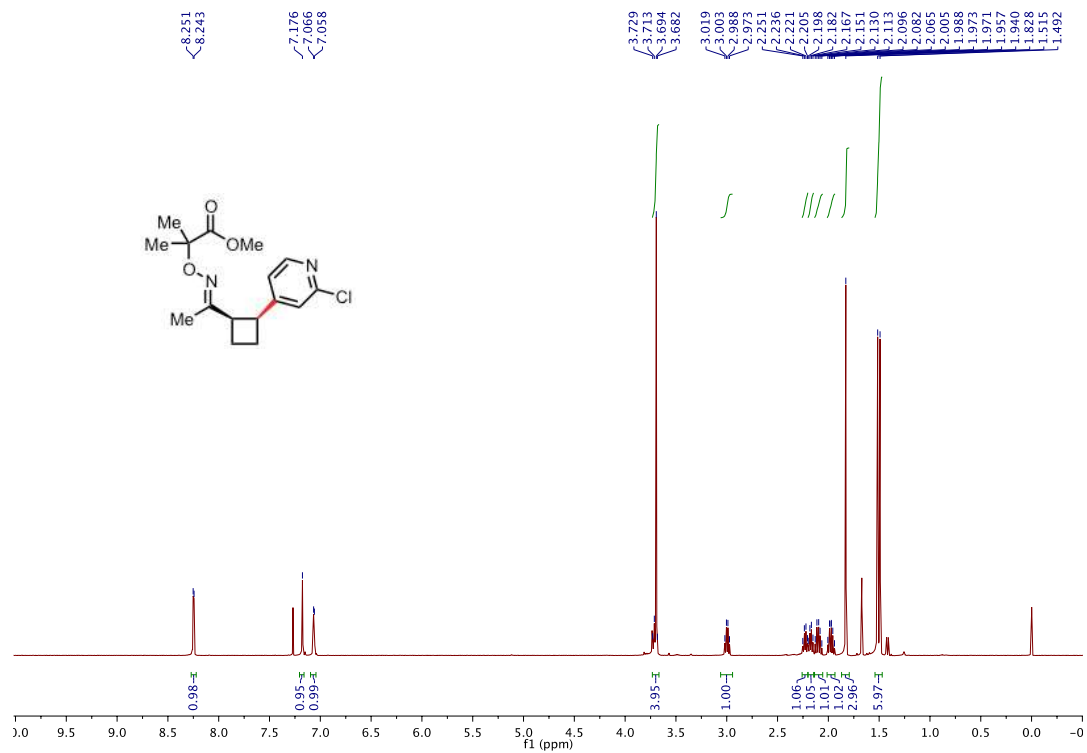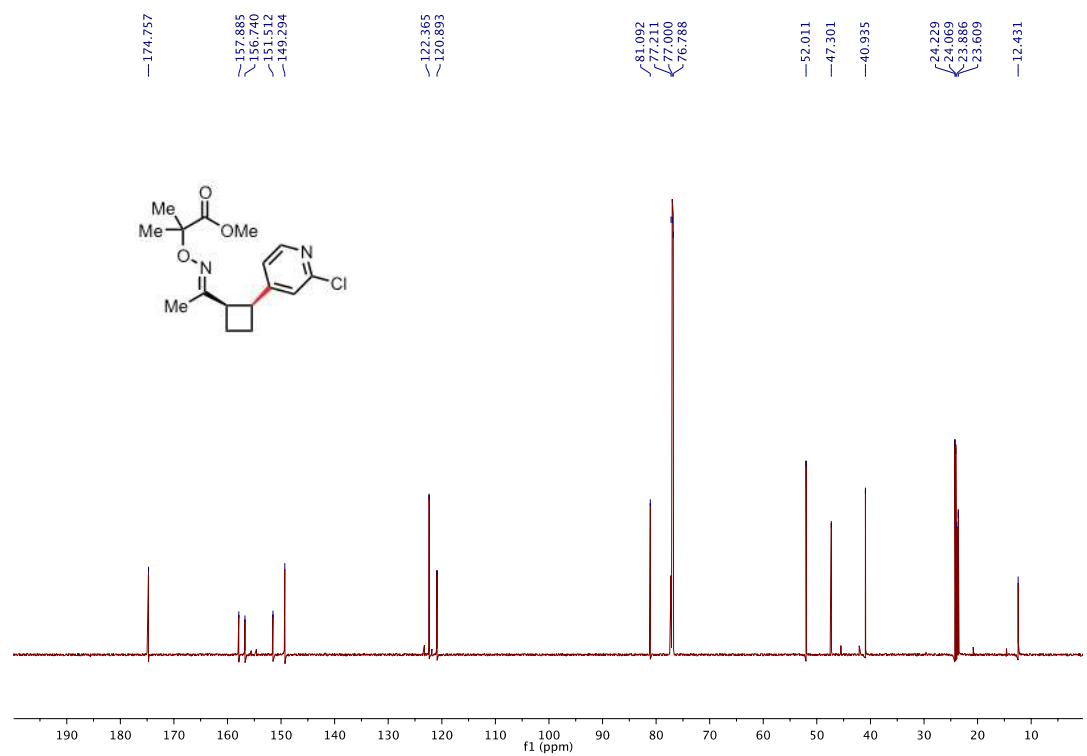

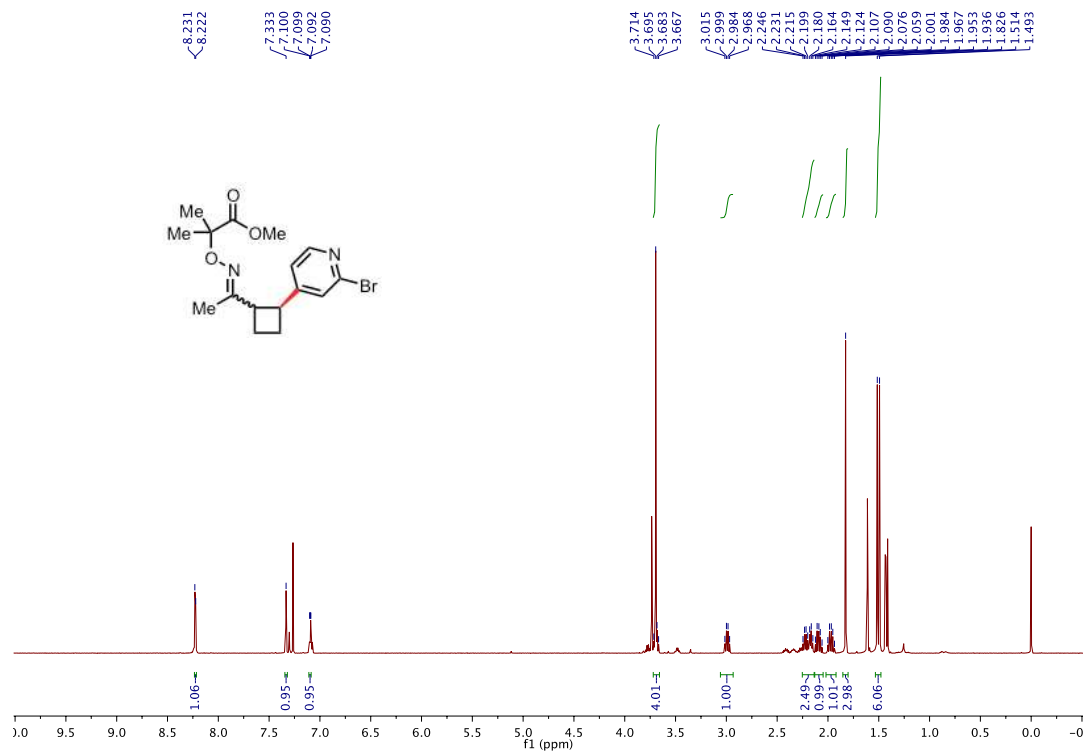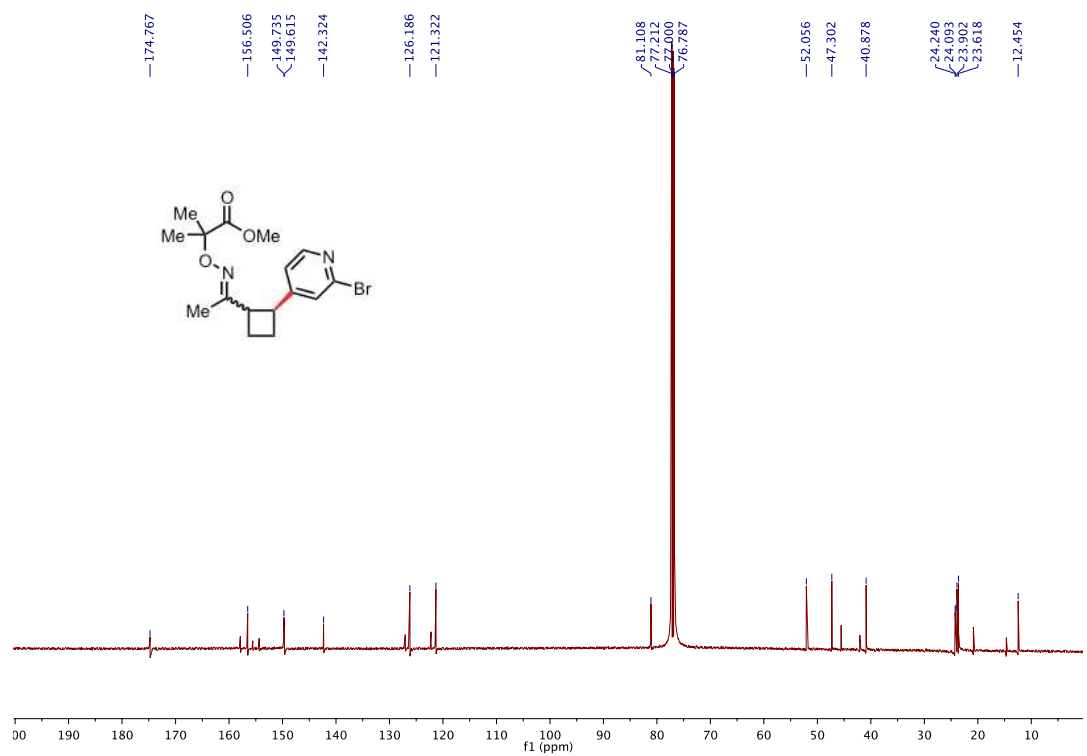

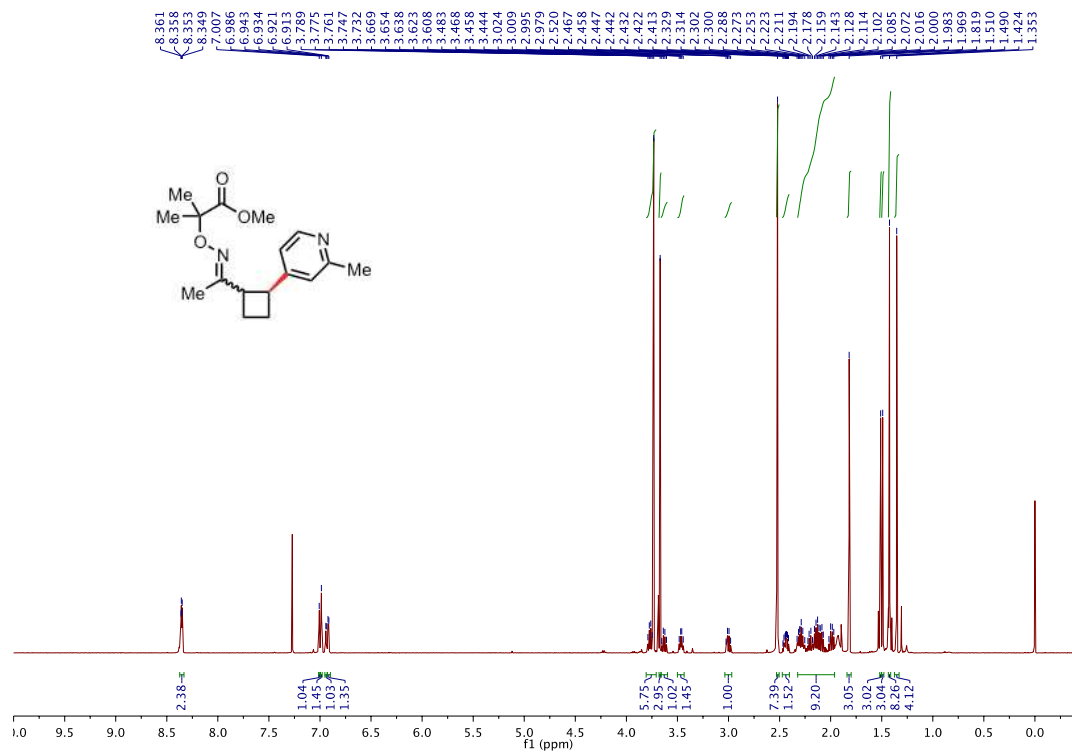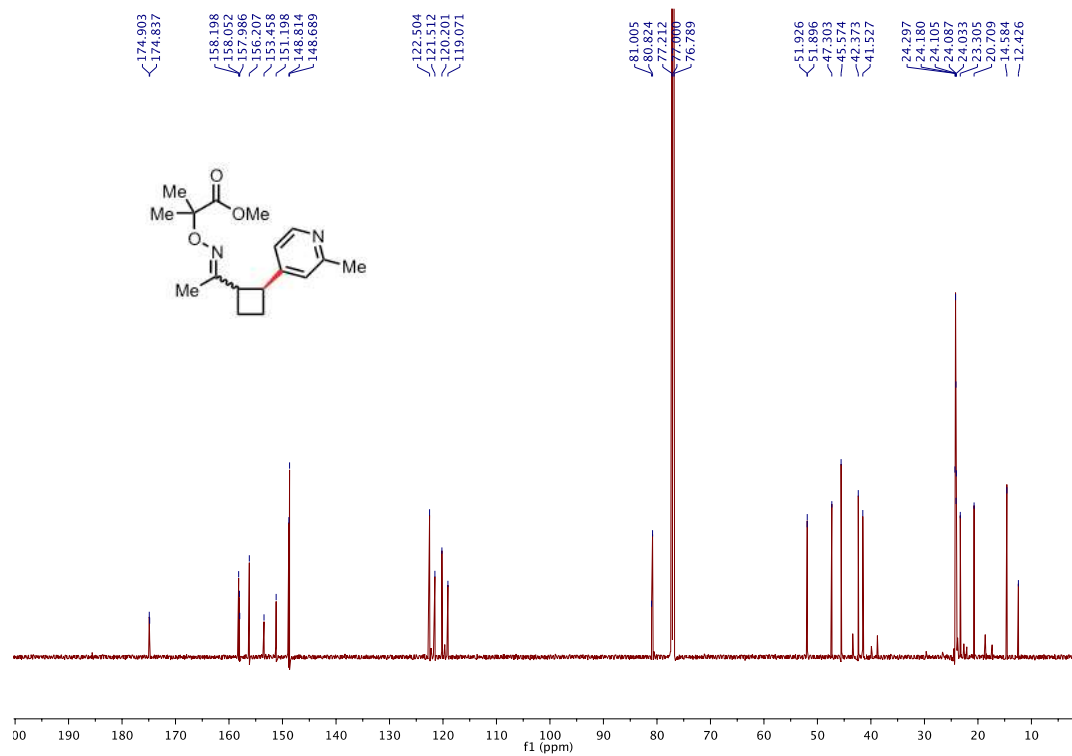



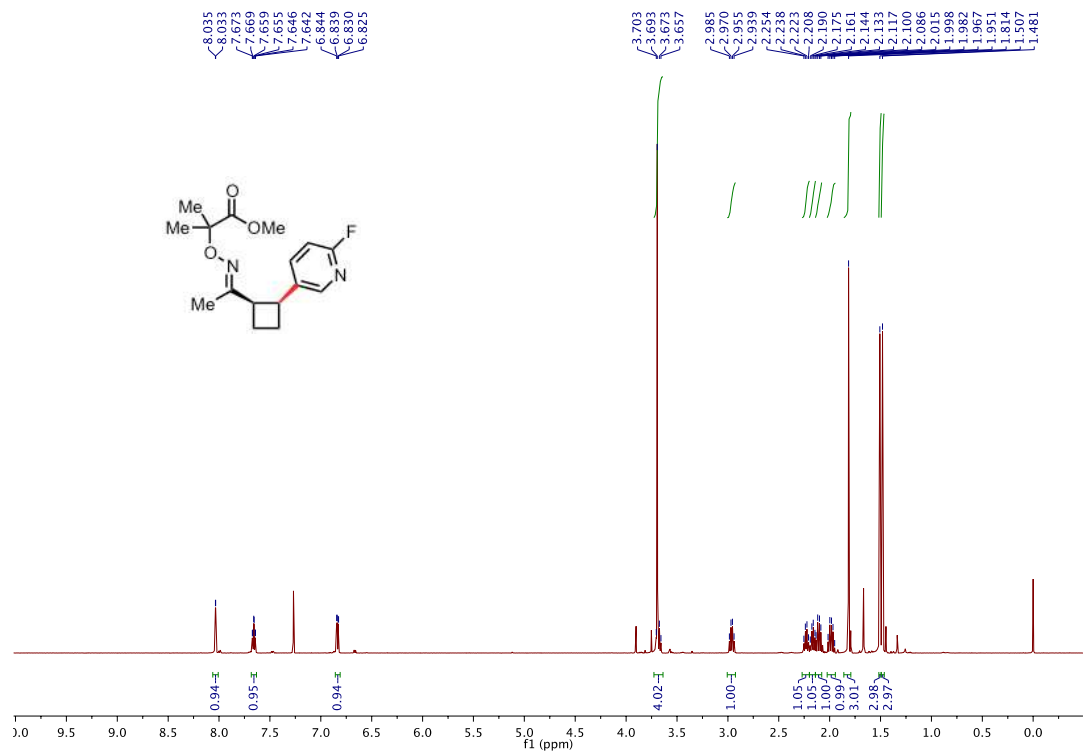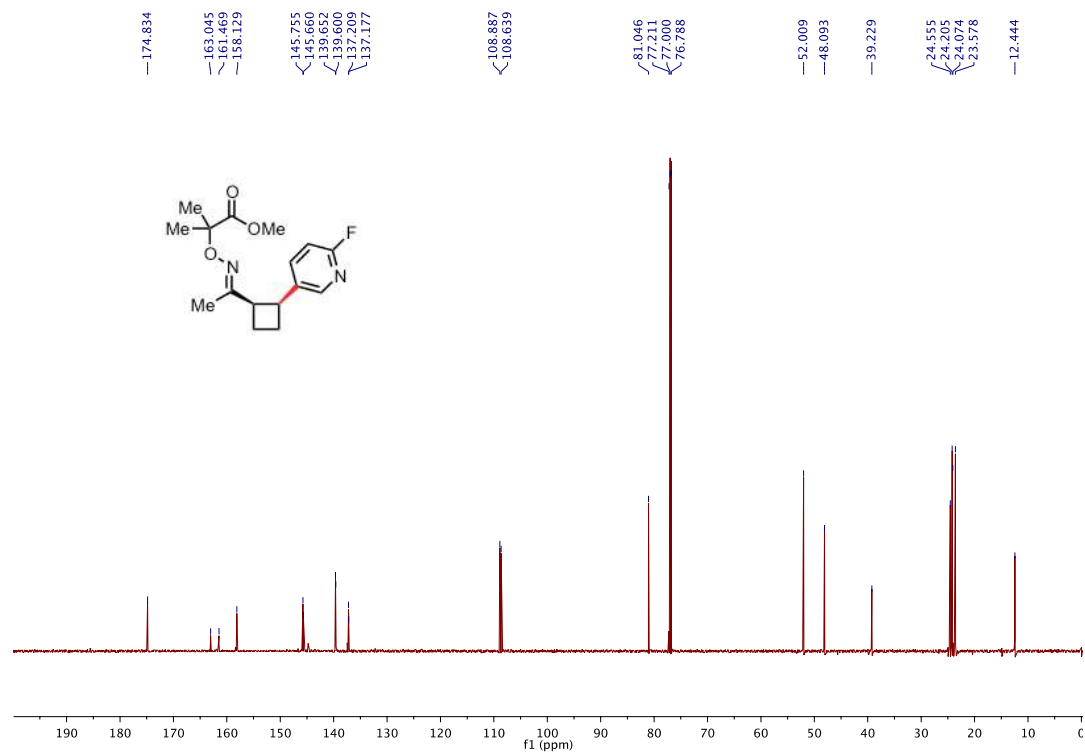

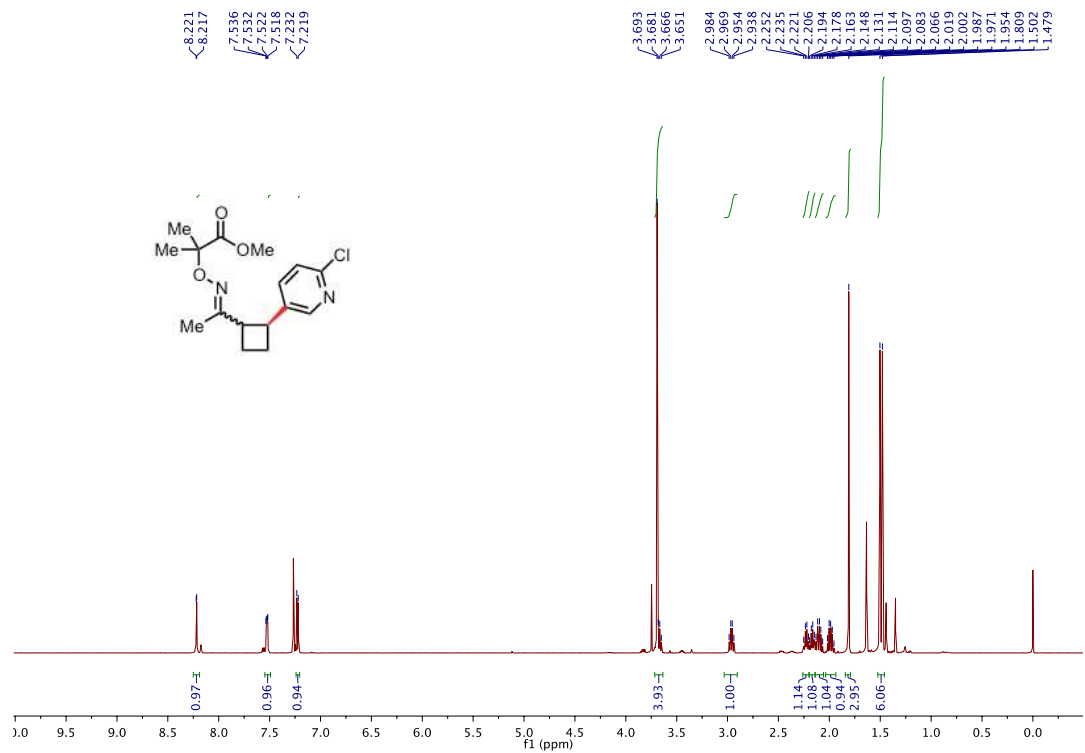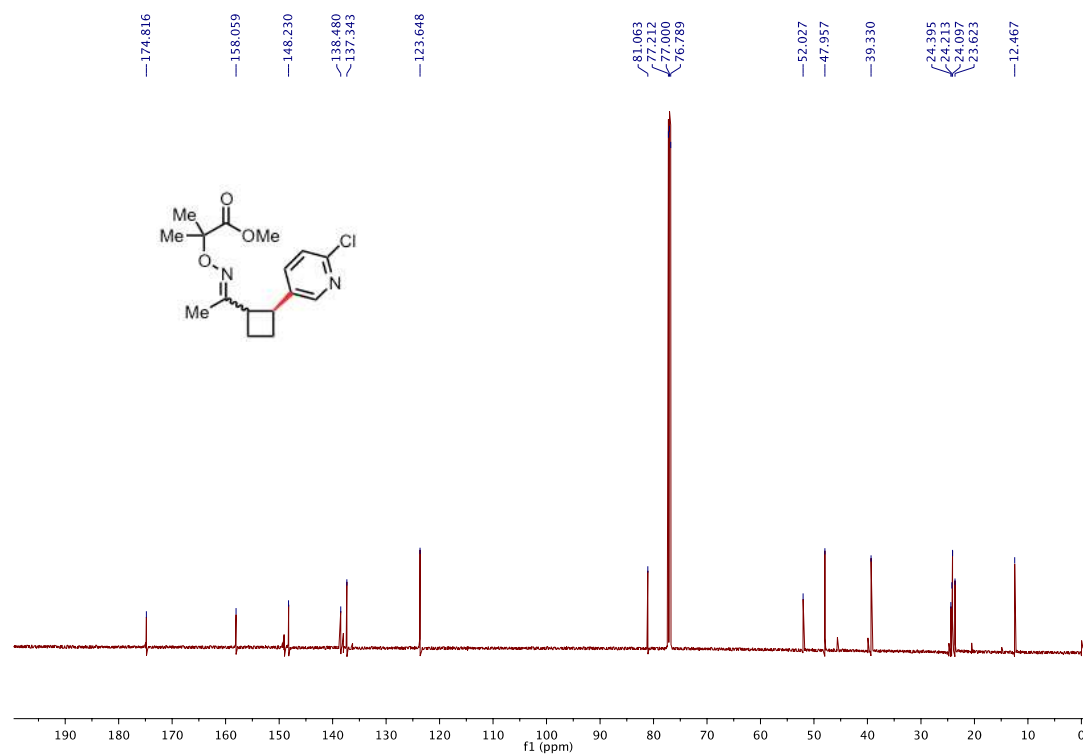

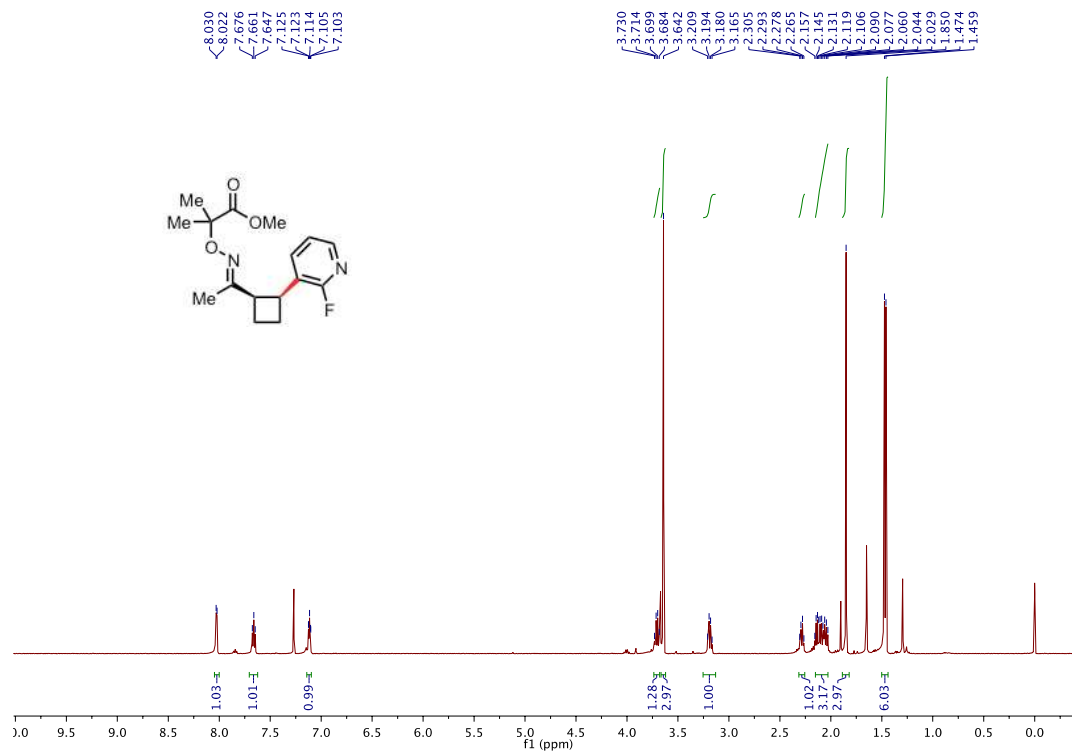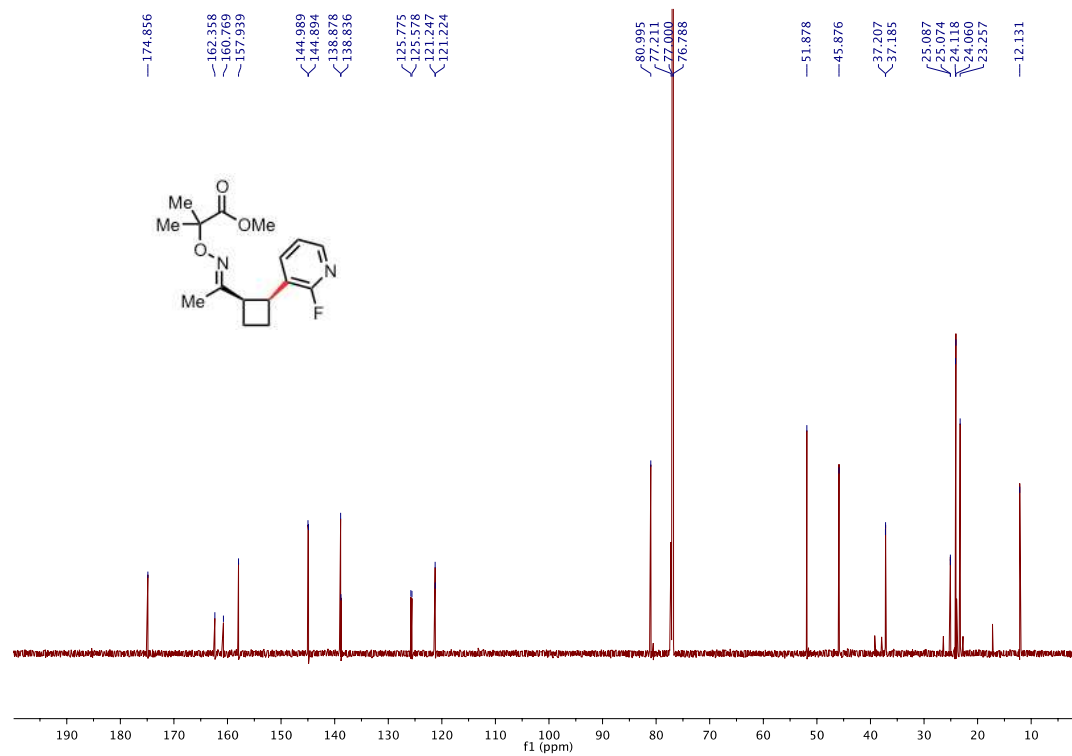

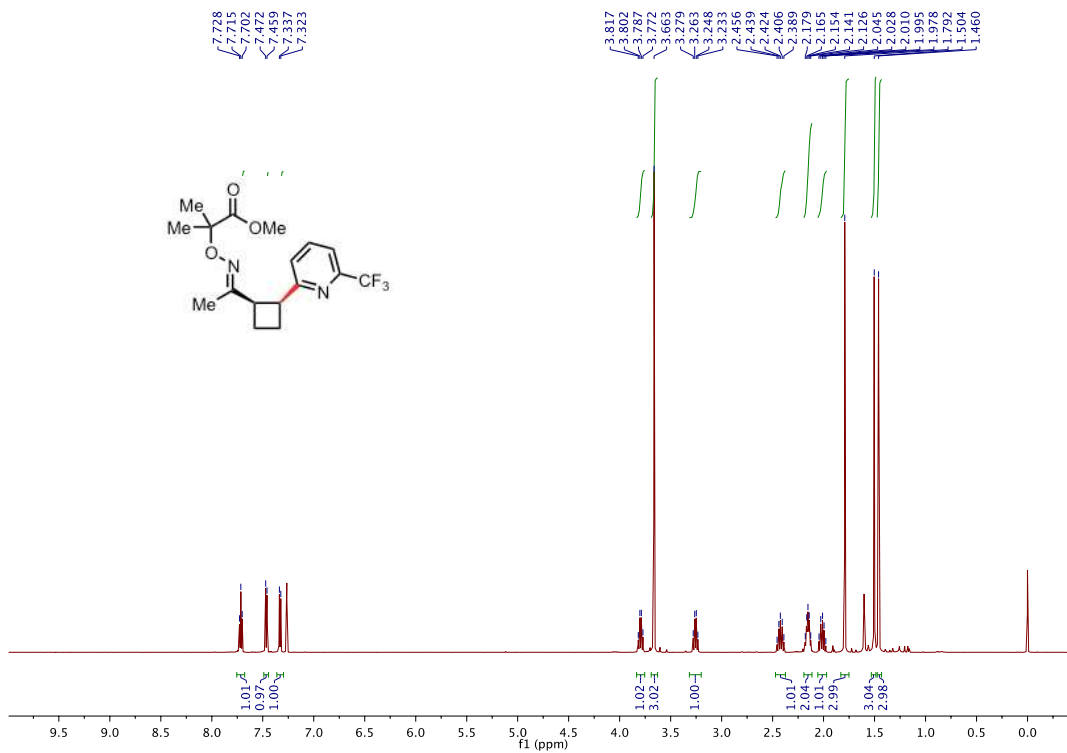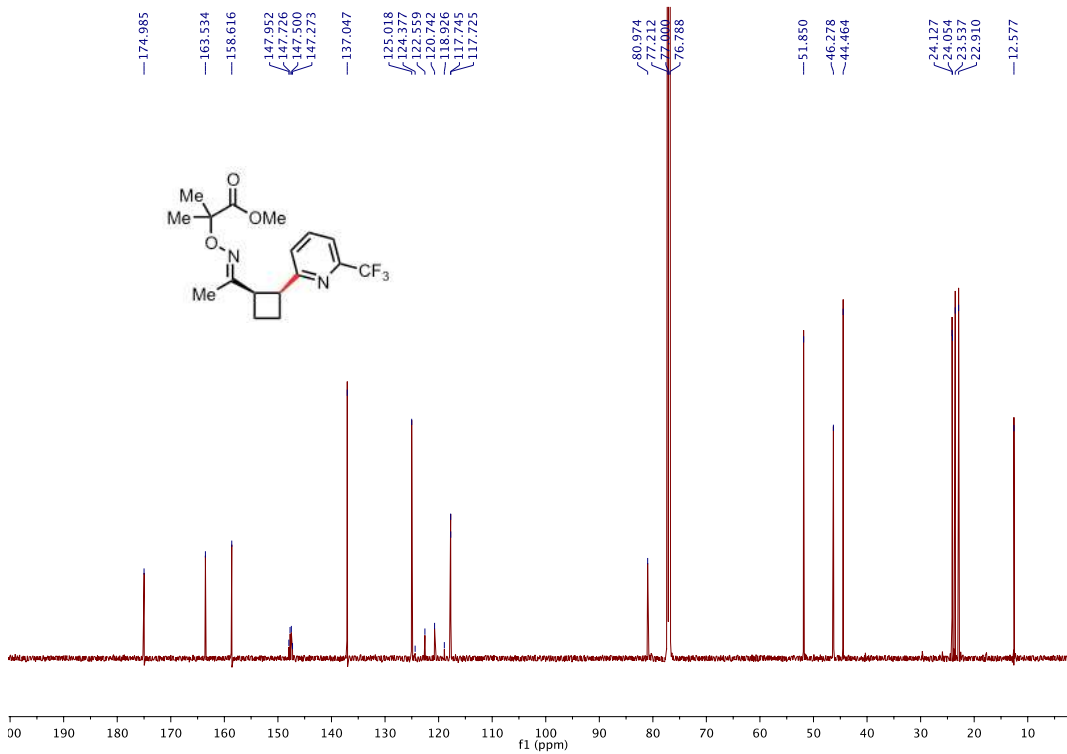

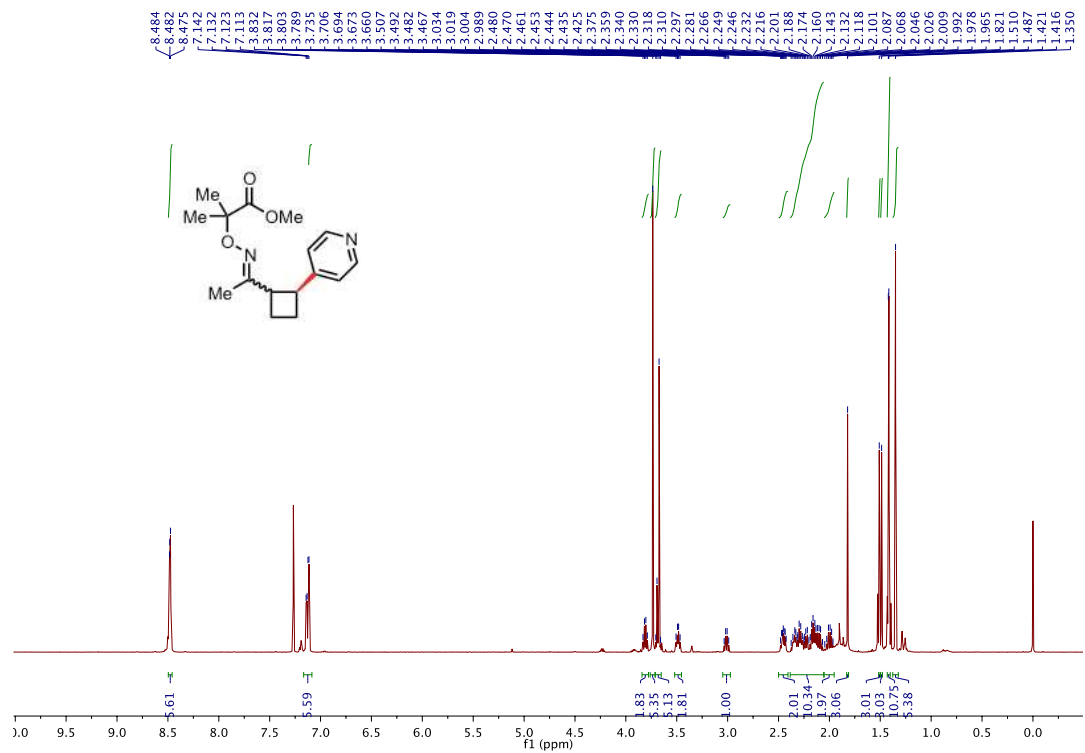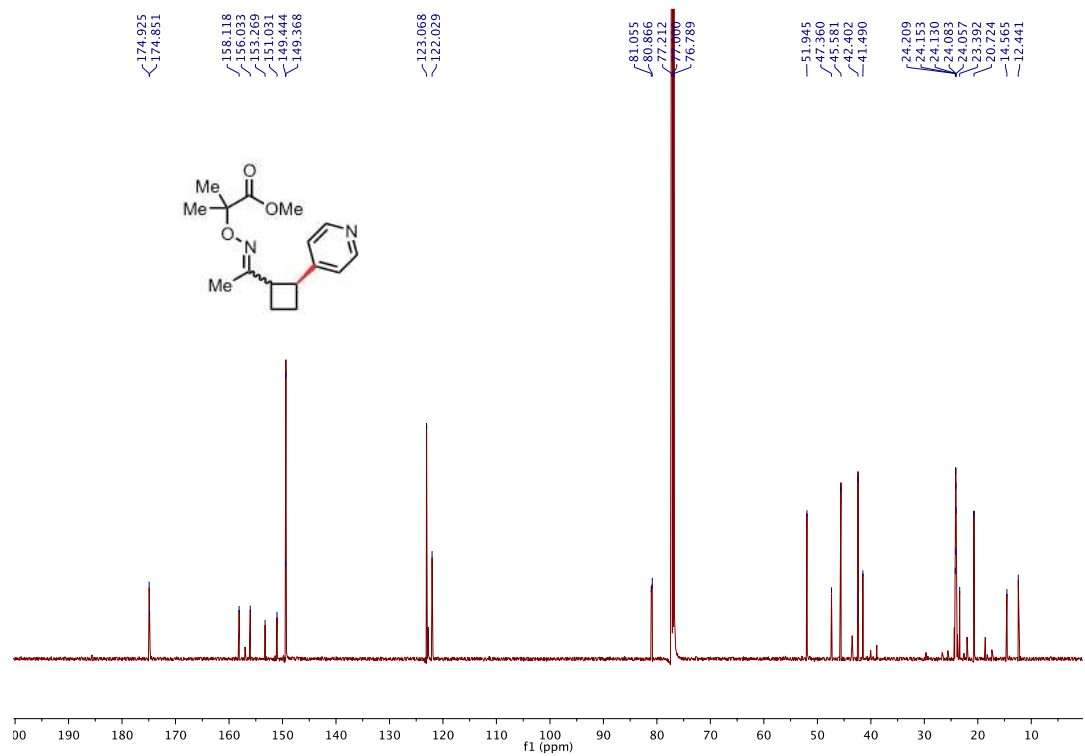

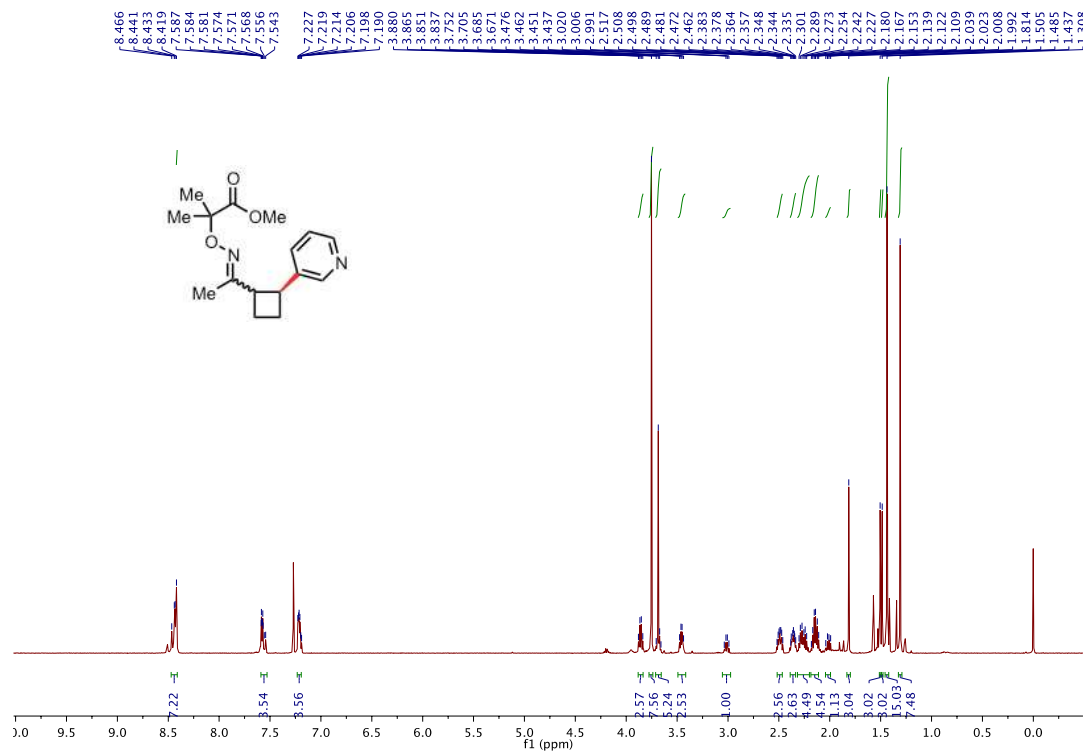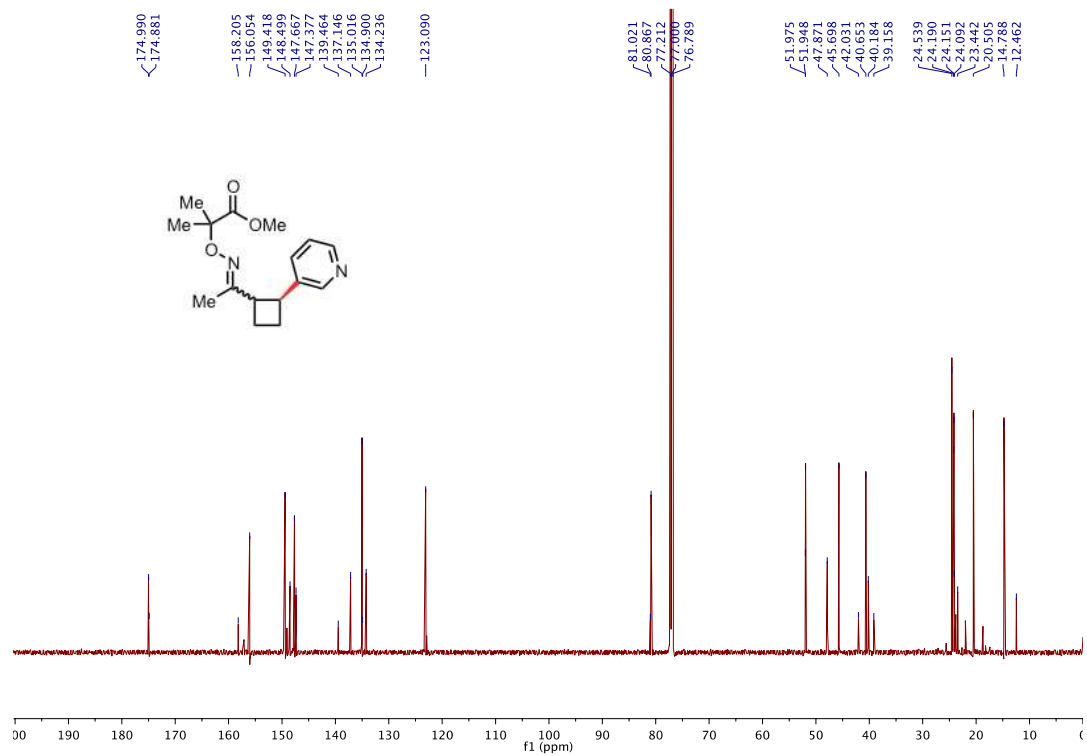

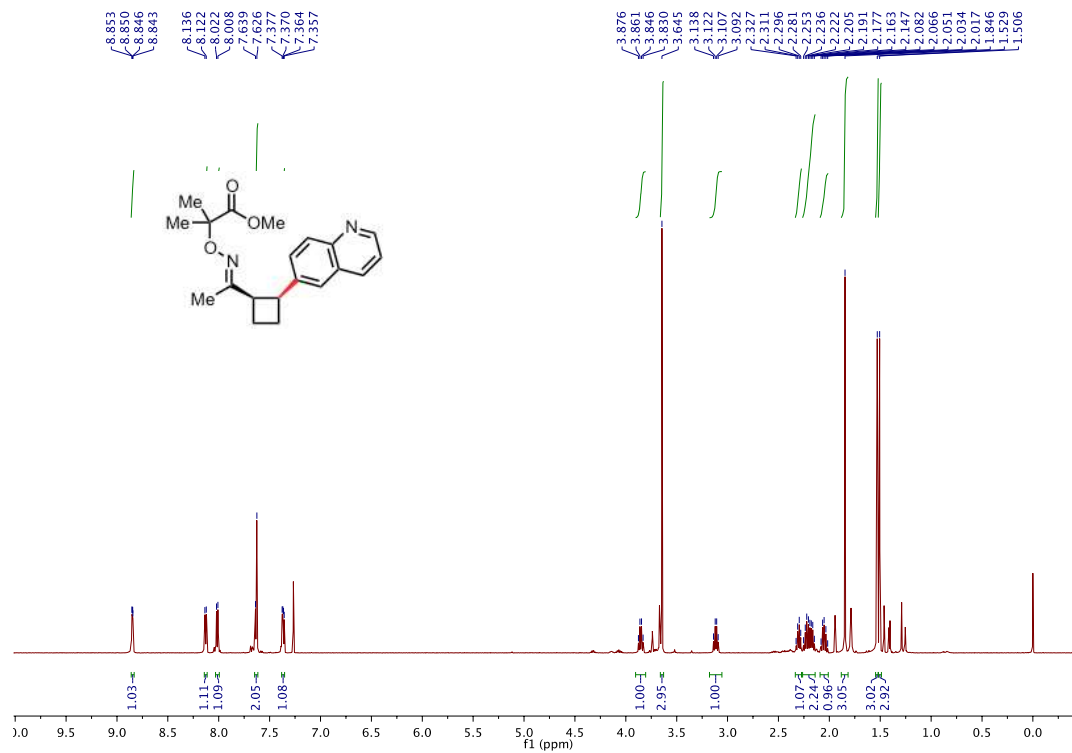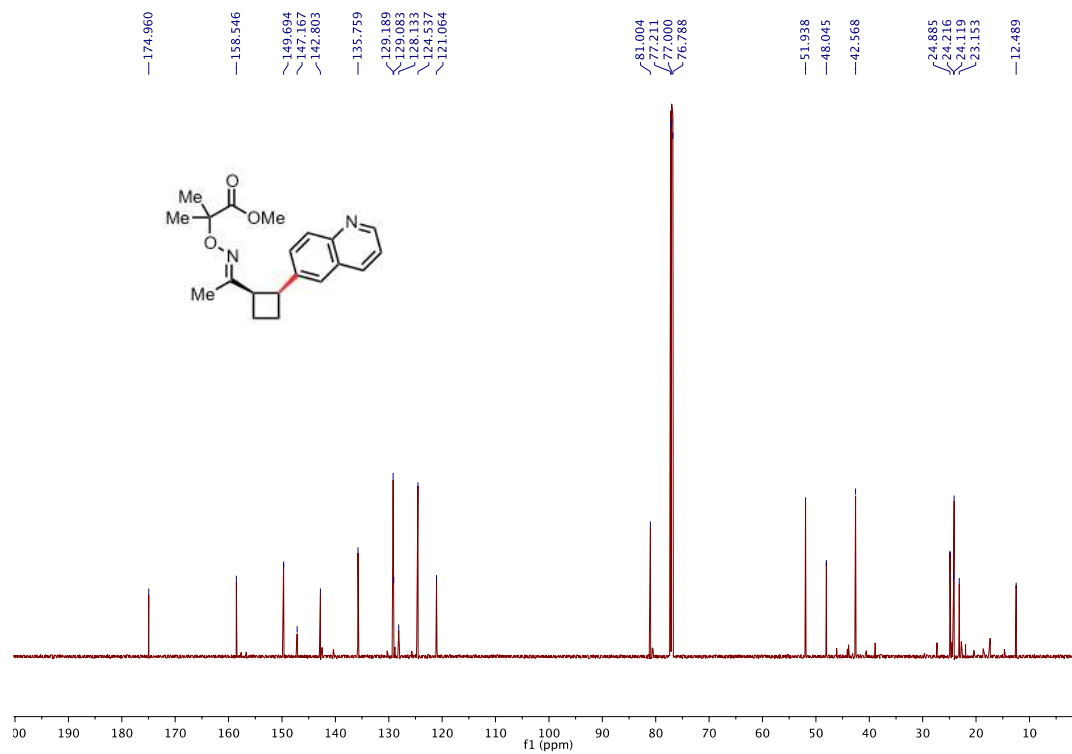

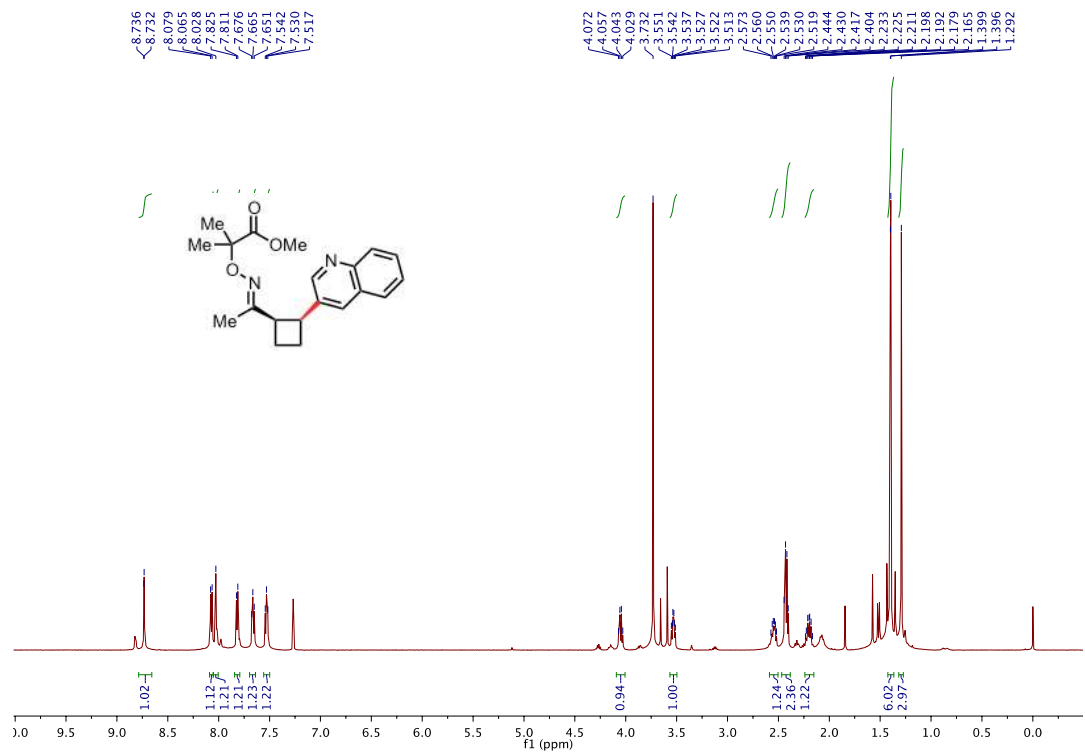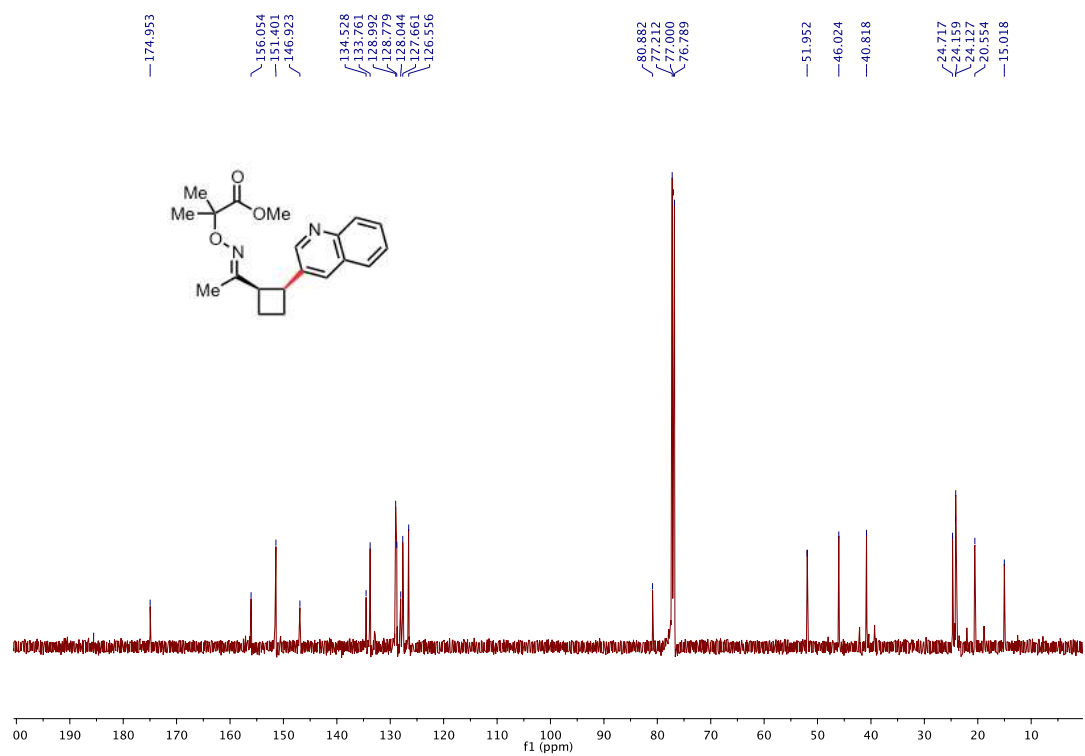



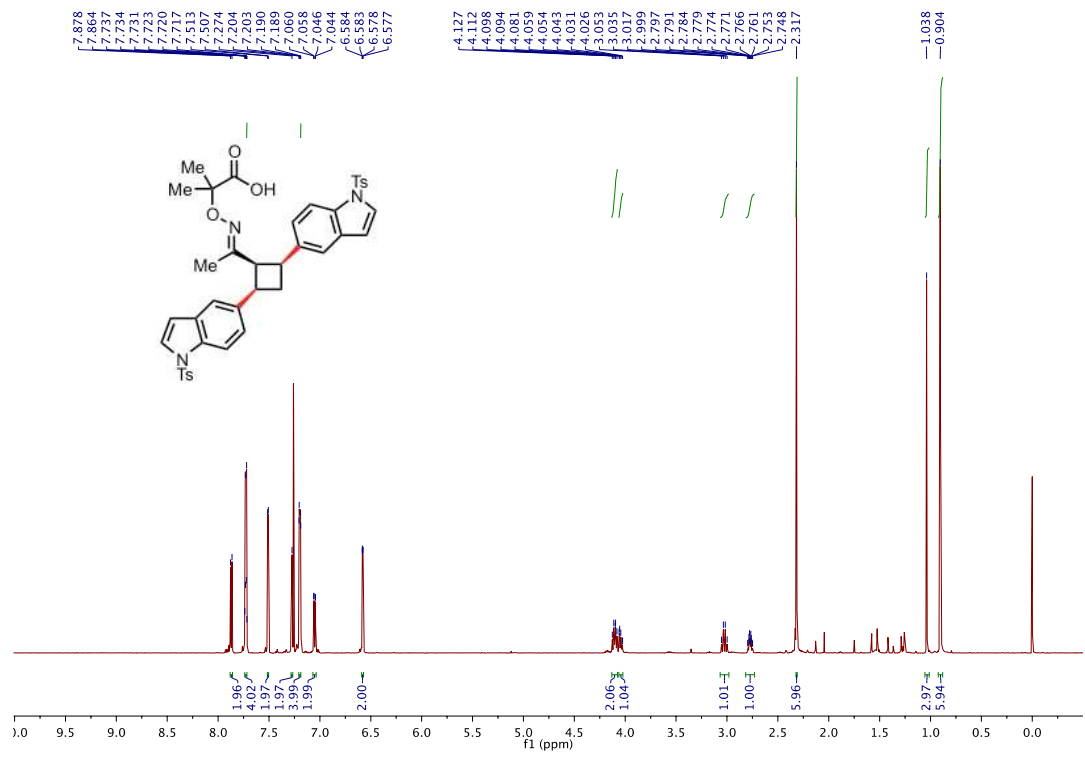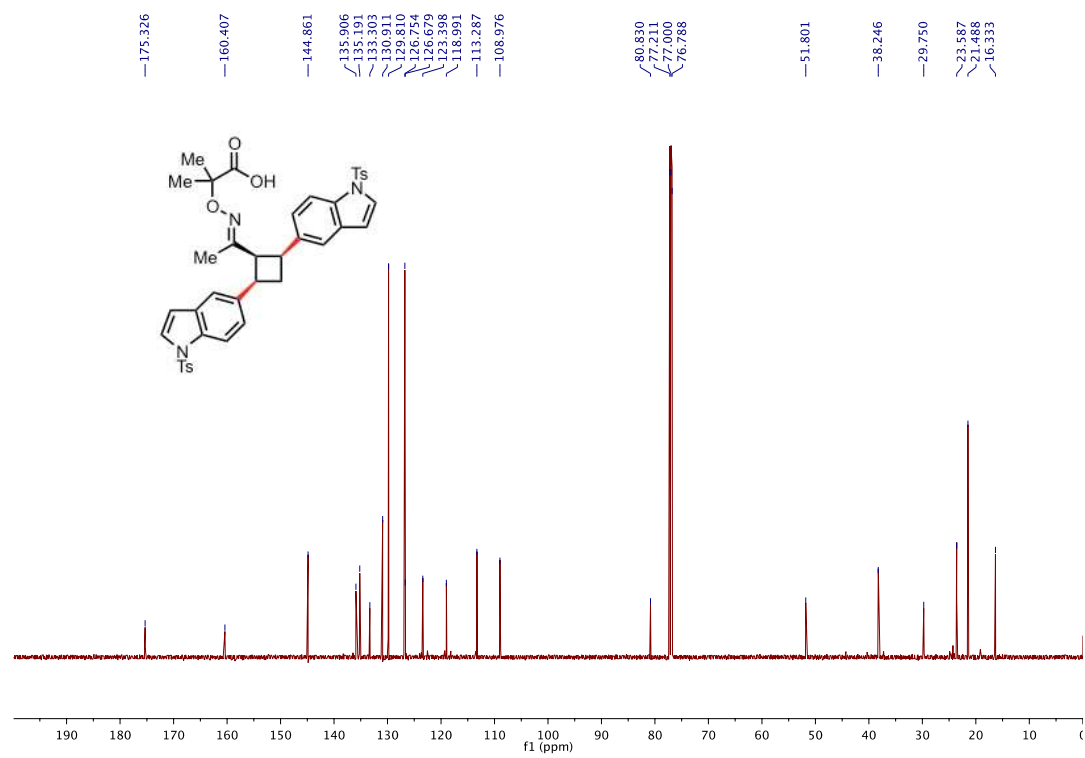

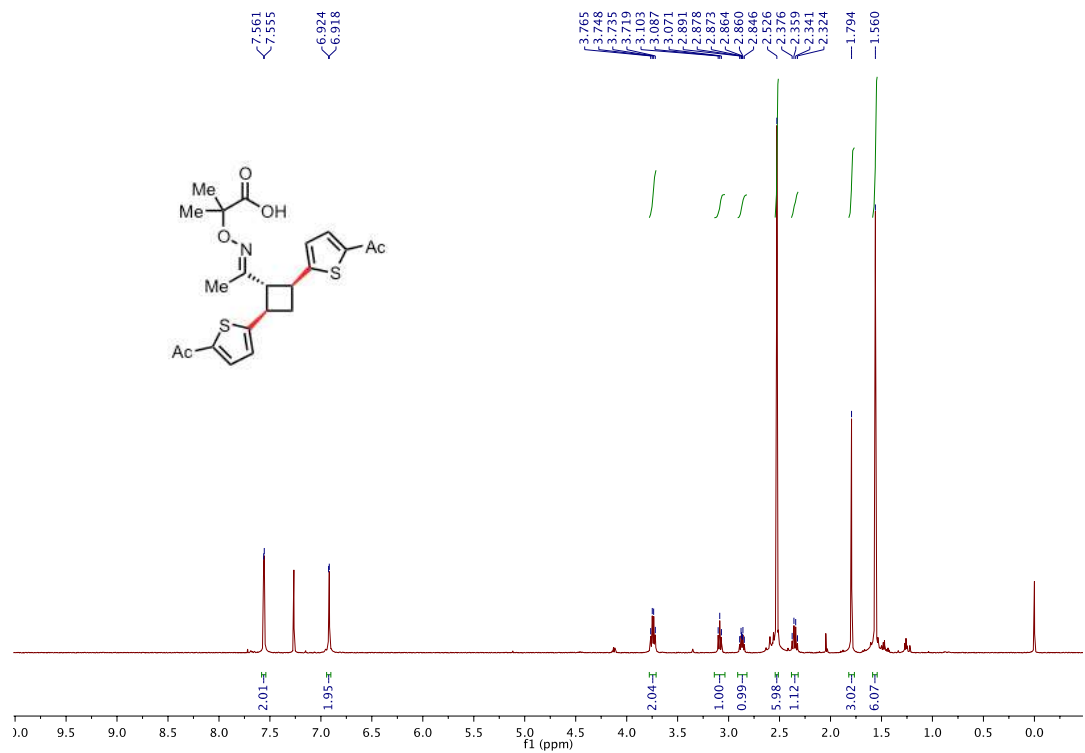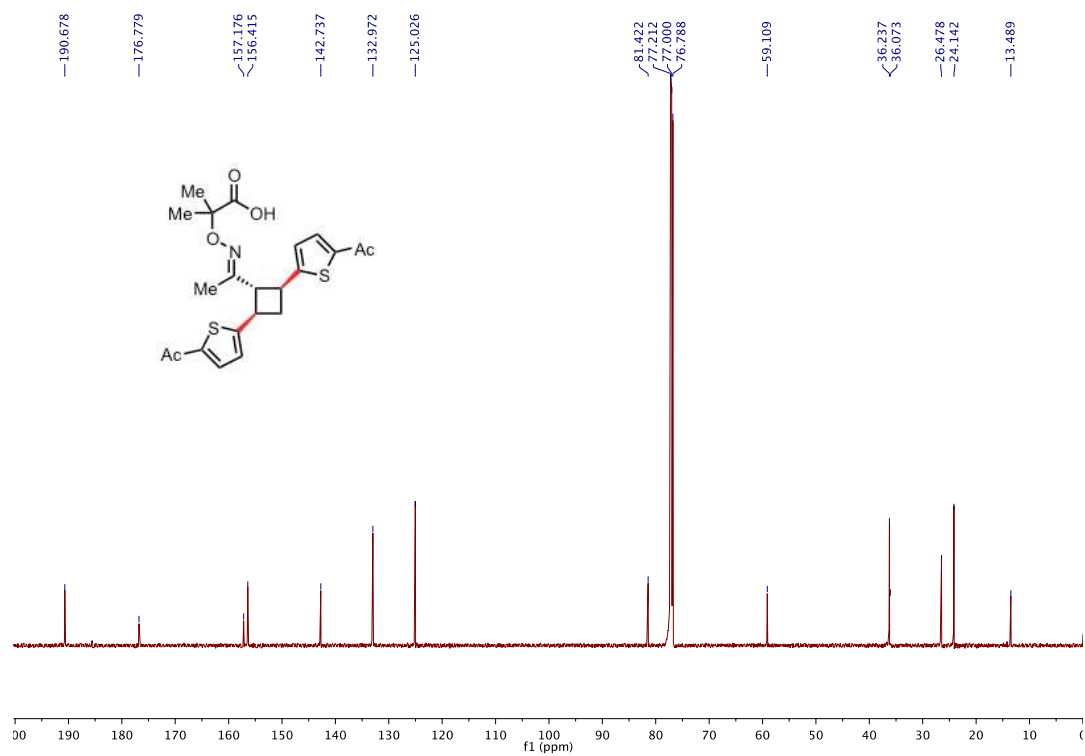

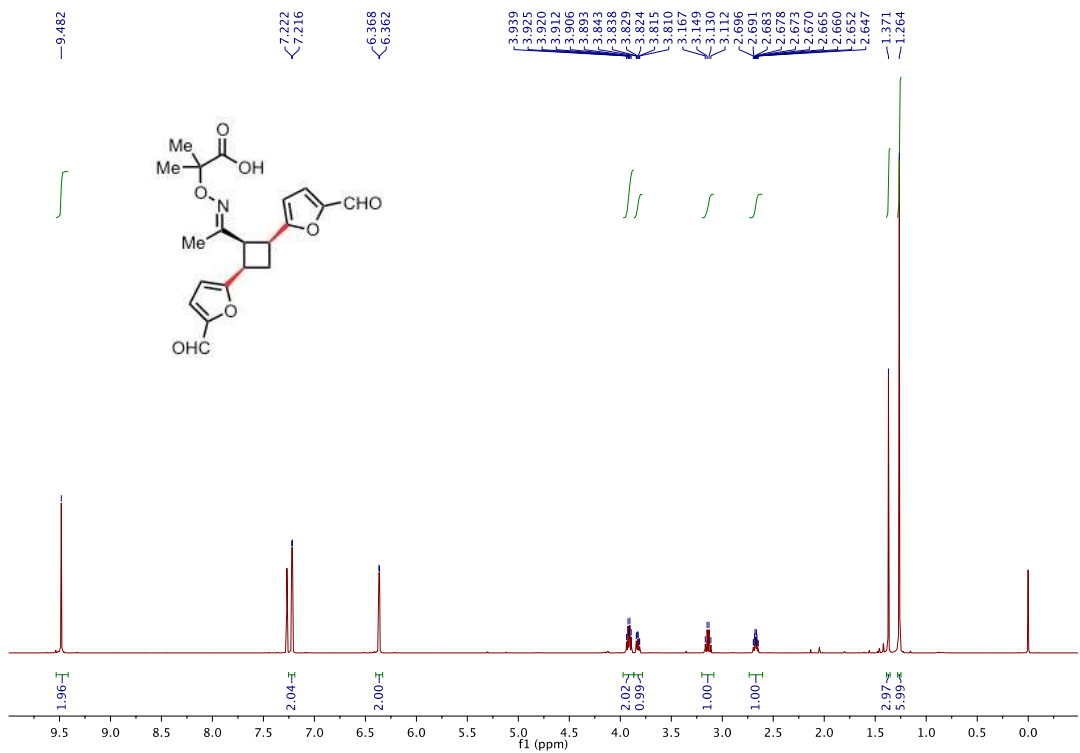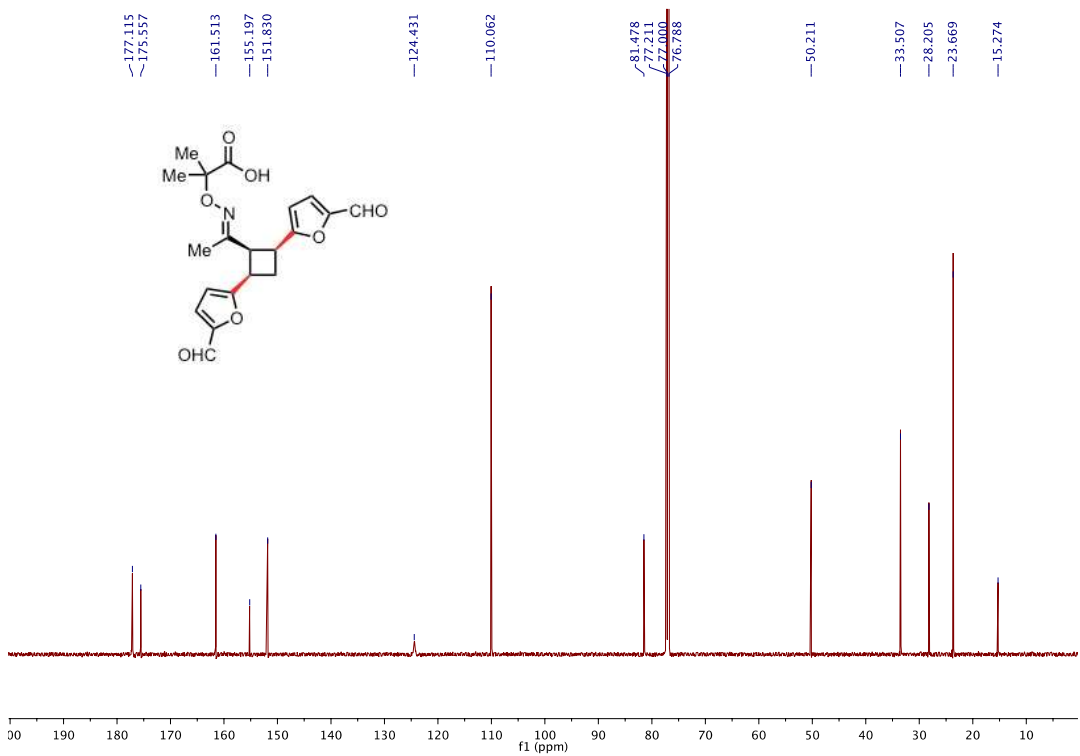

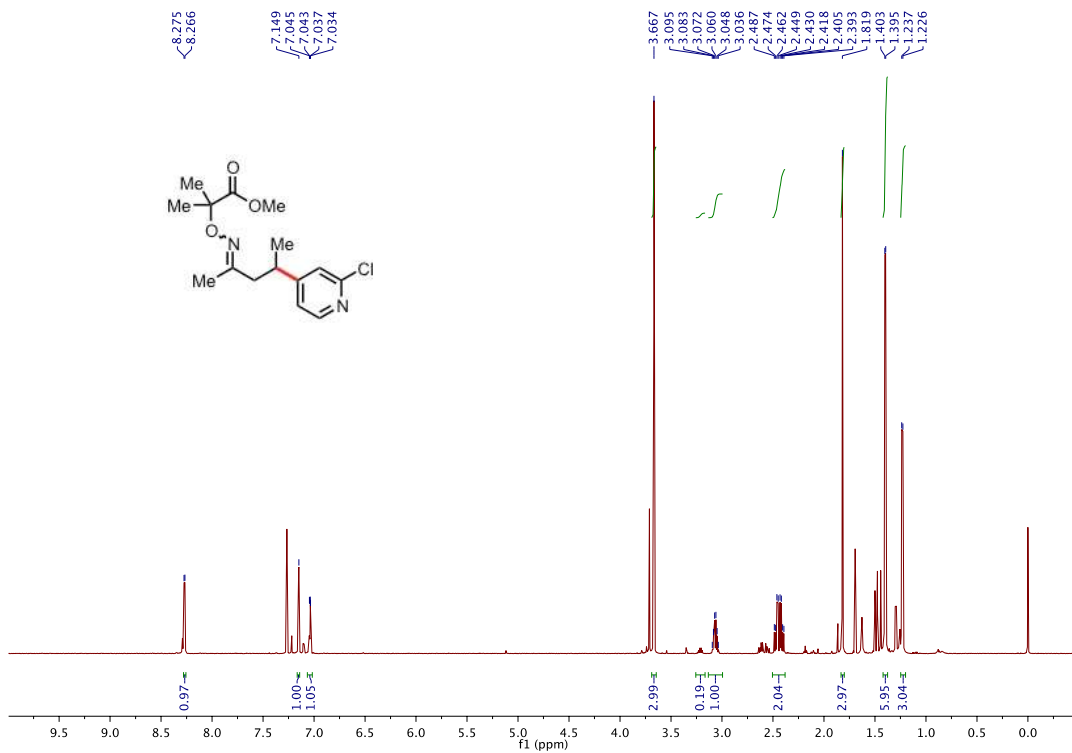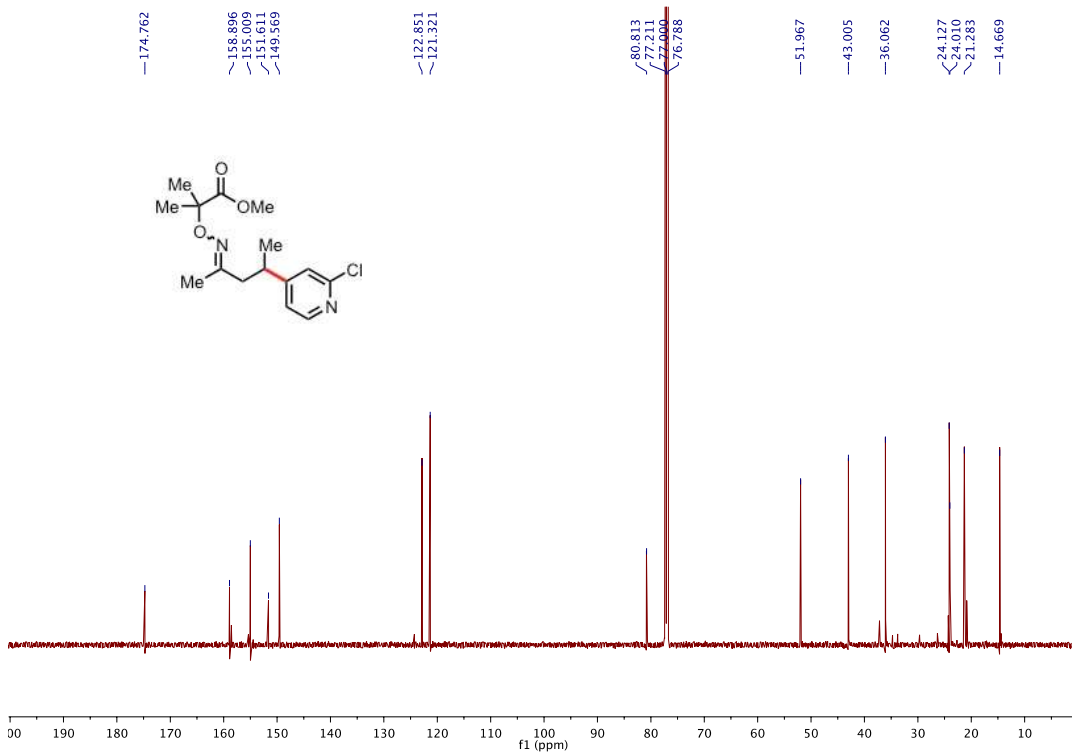

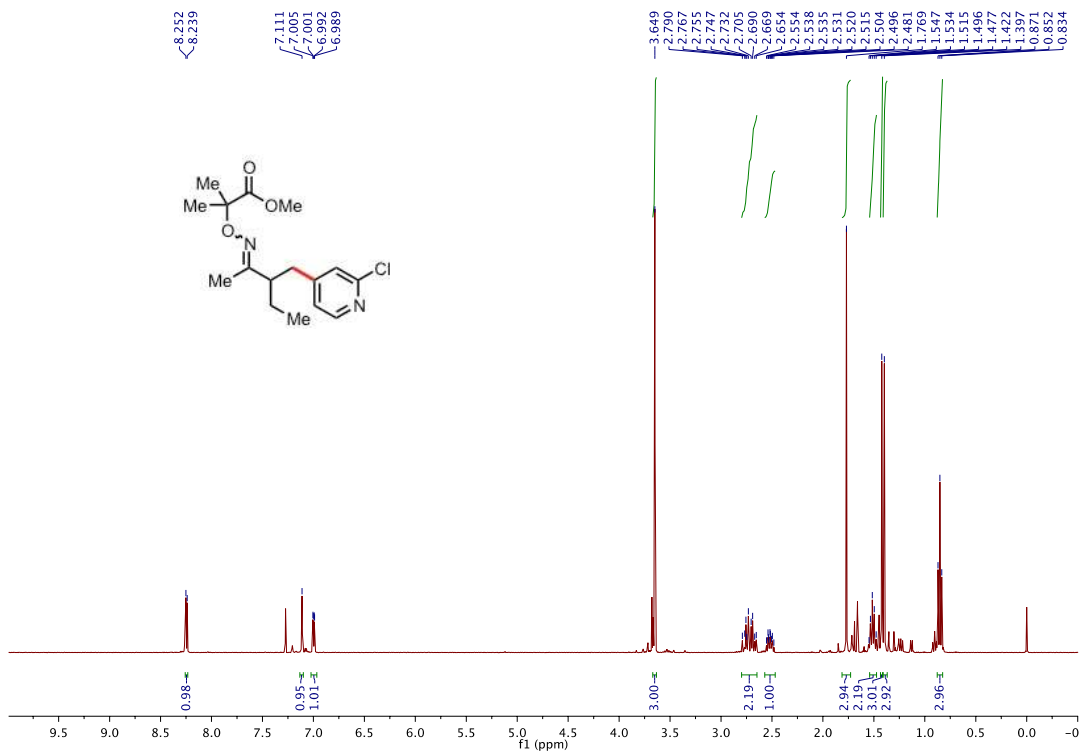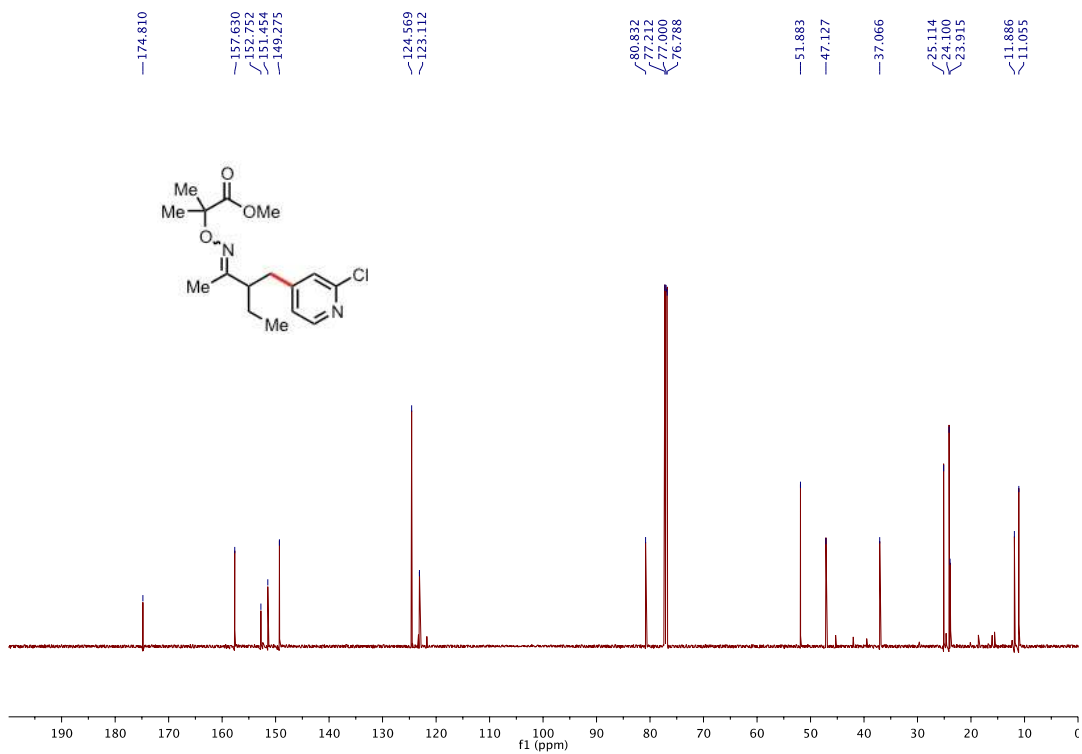

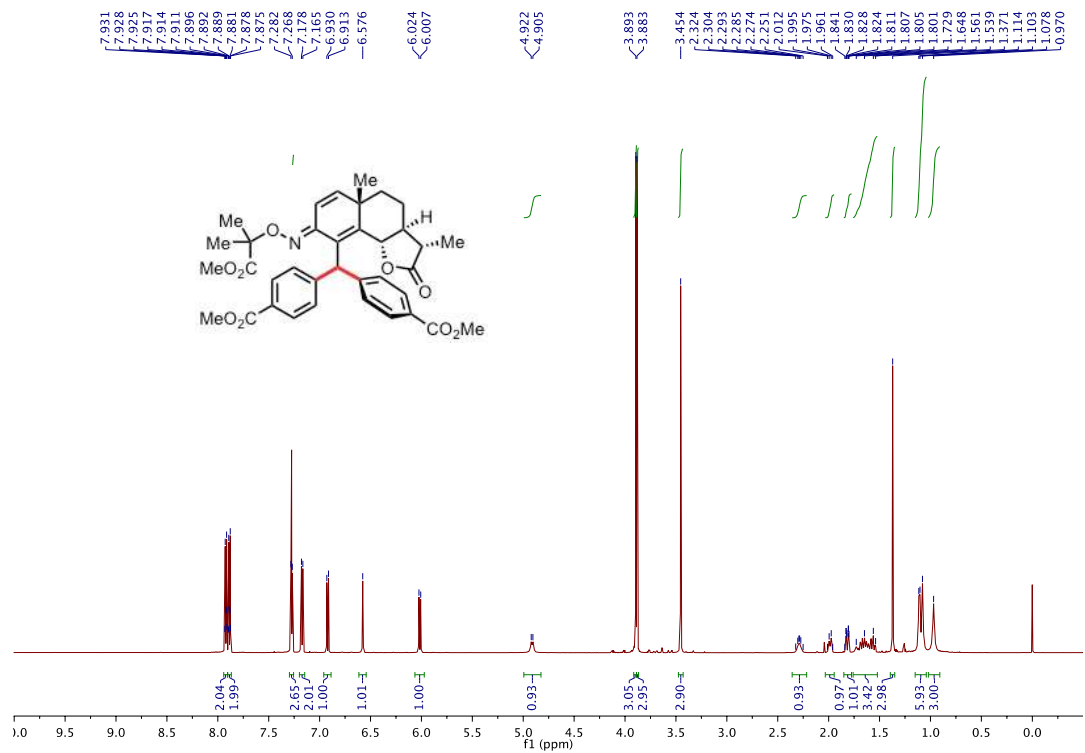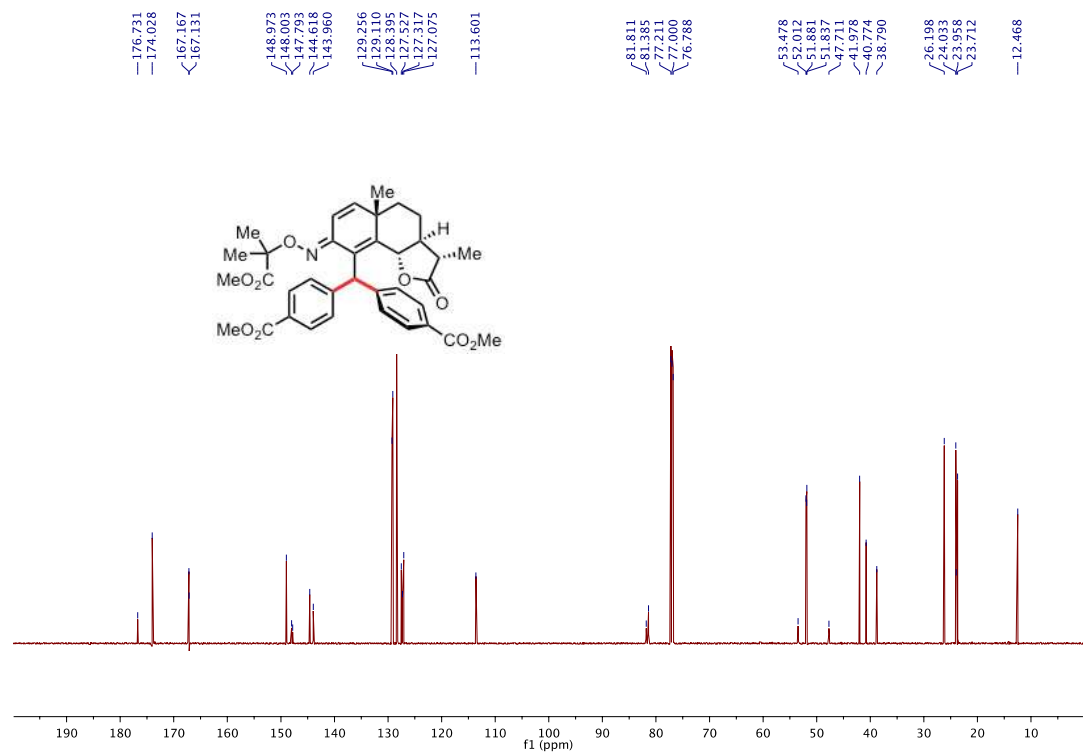

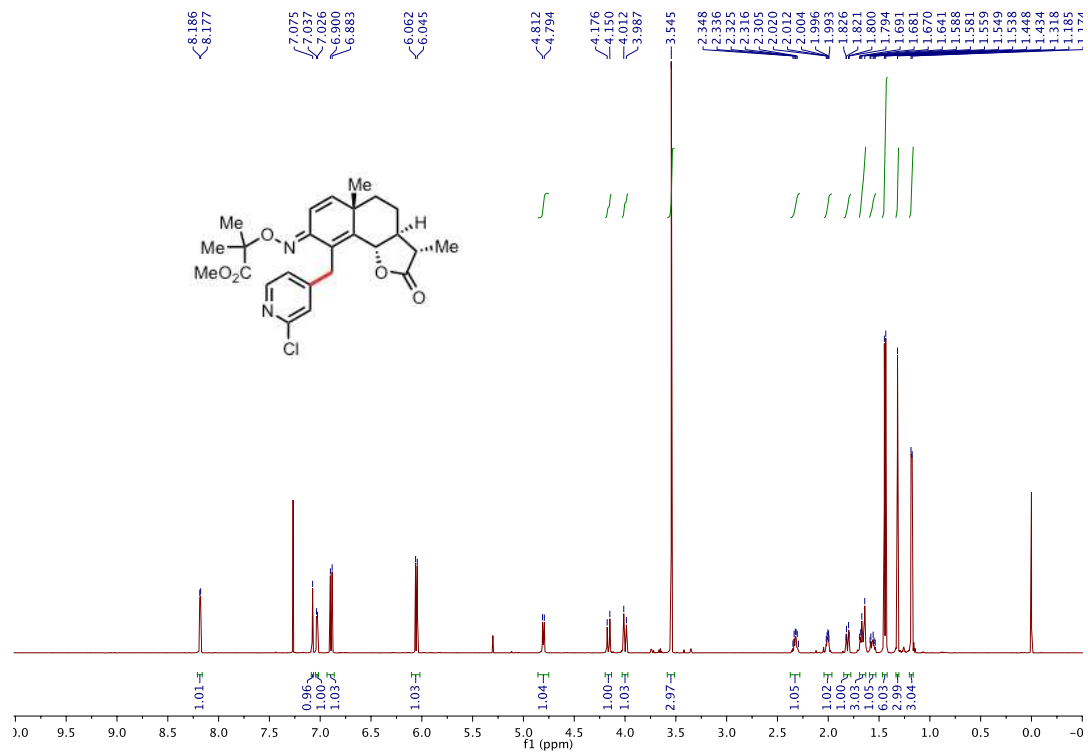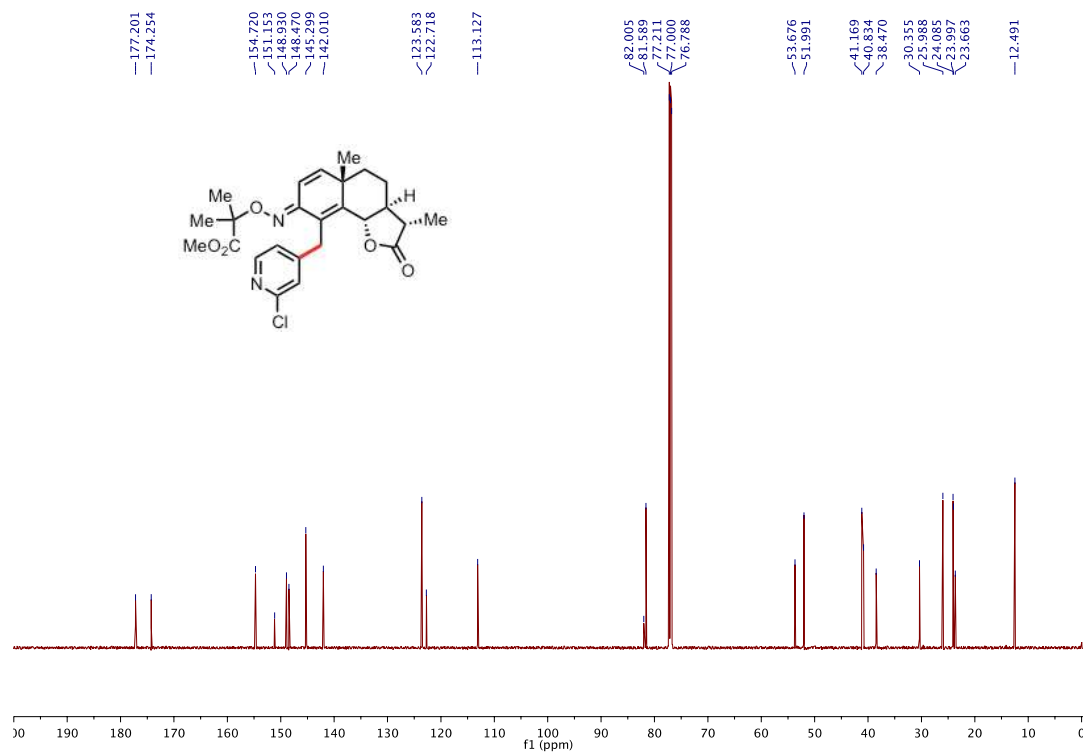

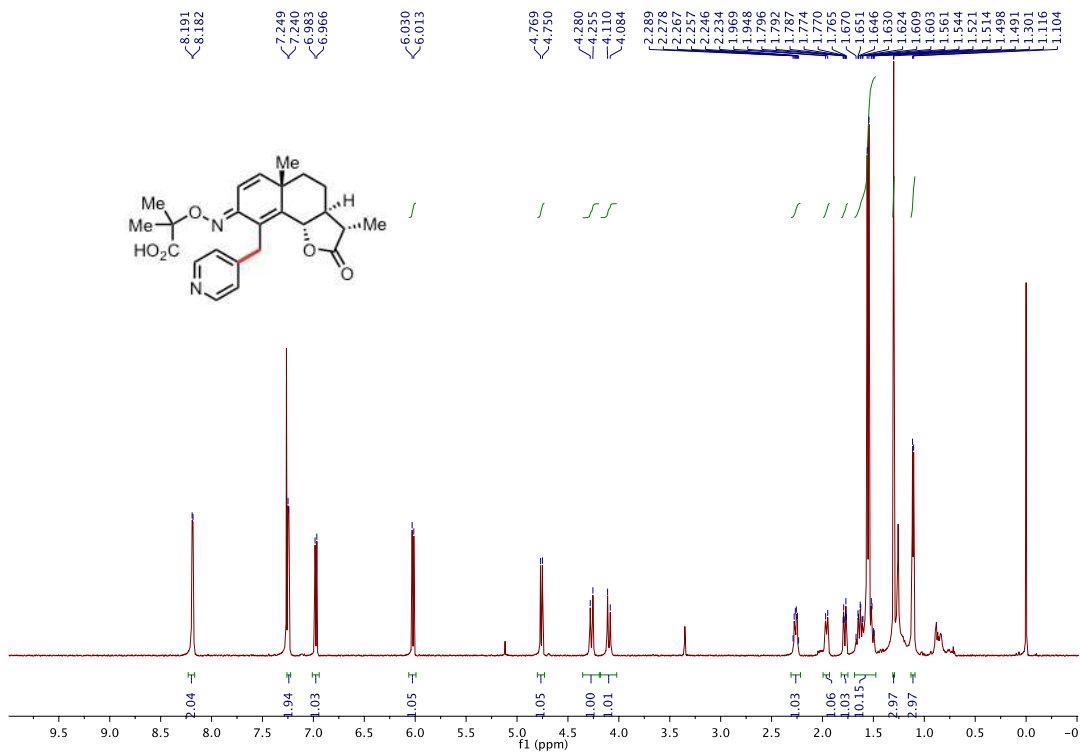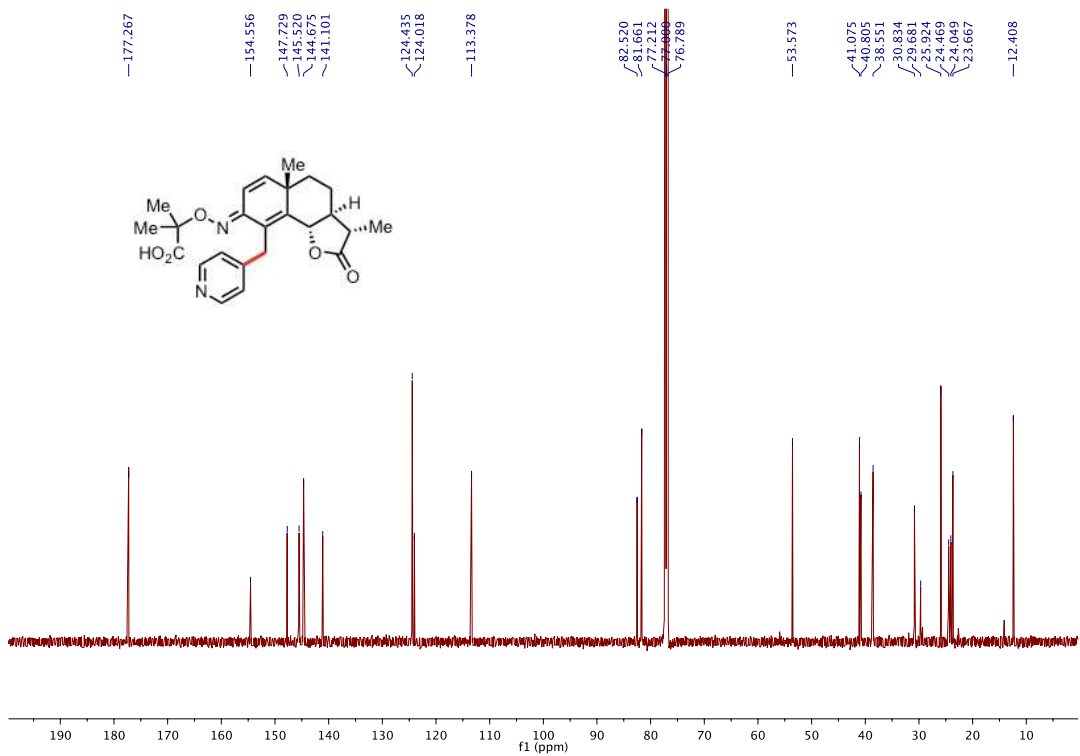



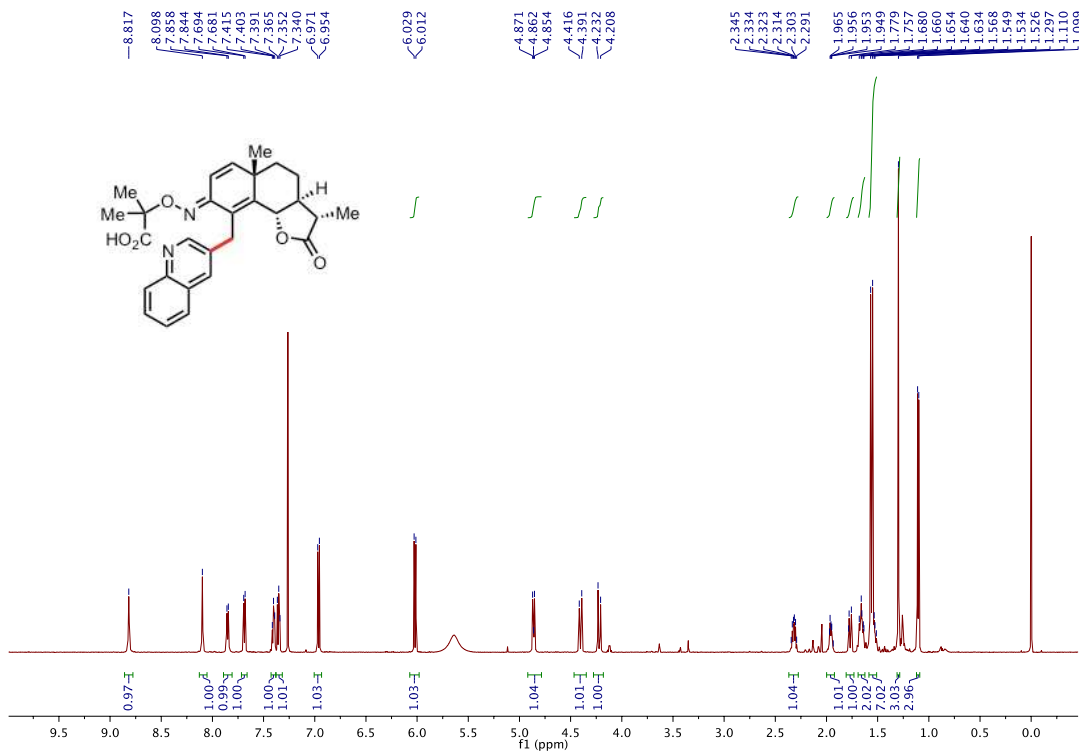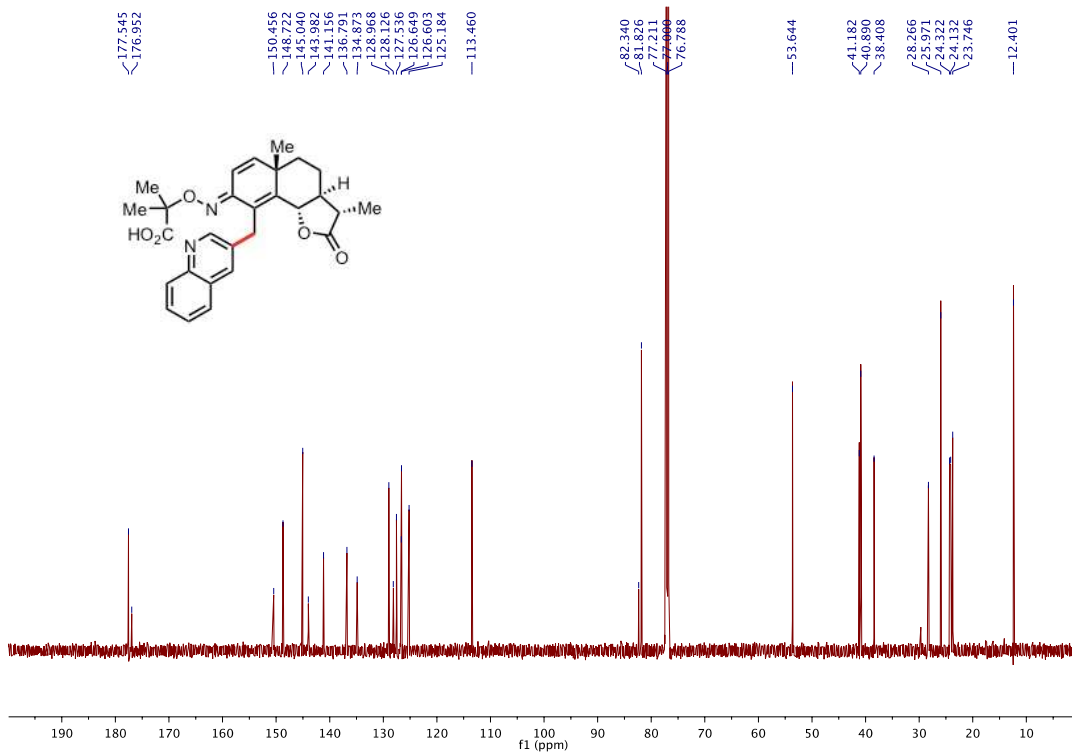

Supplement: NIHMS921020-supplement-SI.pdf [file NIHMS921020-supplement-SI.pdf]
